# Supplementary material
Source: Research Square preprint supplement (doi:10.21203/rs.3.rs-9274540/v1)
Supplement: Supplementary file 1 [file c5f8b73926b889af0dc71043.docx]

**Table of Contents**

**Section 1. Reagents and instruments**

Section 1.1. Reagents

Section 1.2. Instruments

**Section 2. Synthesis and characterization**

Section 2.1. Synthesis and characterization of ZIF-Cu

Section 2.2. Synthesis and characterization of tZIF-Cus

**Section 3. Electrocatalytic performance and characterization**

Section 3.1. Electrochemical test

Section 3.2. Reactors and electrosynthesis methods

Section 3.3. Quantitative methods

Section 3.4. Electrocatalytic performance

**Section 4. Uncovering catalytic mechanisms**

Section 4.1. Geometrical confined effect calculation

Section 4.2. Electronic confined effect calculation

Section 4.3. Temperature programmed desorption and in-situ spectroscopy

Section 4.4. Calculation of reaction energy barriers

**Section 5. Pilot test setup**

**References**

**Section 1. Reagents and instruments**

**Section 1.1. Reagents**

All reagents were of analytical grade and used as received without further purification. 2-Methylimidazole (MeIM), methanol, ethanol, metal nitrates (Cu/Zn/Fe/Co), potassium salts (KHCO3, KNO3, KNO2, KOH), and other inorganic reagents were purchased from Thermo Fisher (Shanghai, China). Nafion solution (5 wt.%), deuterated reagents, radical trapping agent (5,5-dimethyl-1-pyrroline N-oxide, DMPO), and colorimetric reagents were purchased from Sinopharm (Shanghai, China). All aqueous solutions were prepared with deionized water (18.25 MΩ cm at 25 °C).

**Section 1.2. Instruments**

**Fourier transform infrared (FT-IR) spectroscopy:** FT-IR spectra were recorded on a Bruker Tensor II spectrometer (Germany) in the range of 400–4000 cm–1 using the KBr pellet method, with 32 scans accumulated at a resolution of 4 cm–1.

**X-ray diffraction (XRD):** Phase structure and crystal phase analysis of the catalysts were performed on an X-ray diffractometer (D8 Advance, Bruker, Germany) with Cu Kα radiation source (λ=0.15406 nm). The test was conducted at a tube voltage of 40 kV and a tube current of 40 mA, with a 2θ scanning range of 10°–80°, a scanning rate of 2° min–1 and a step size of 0.02°.

**N2 adsorption-desorption isotherm test:** Specific surface area and pore structure of the catalysts were characterized on an automatic specific surface and porosity analyzer (ASAP 2020, Micromeritics, USA). Before the test, the samples were degassed under vacuum at 200 °C for 12 h, and the N2 adsorption-desorption isotherms were collected at 77 K liquid nitrogen temperature. The specific surface area was calculated by the Brunauer-Emmett-Teller (BET) model, and the pore size distribution was obtained from the desorption branch using non-local density functional theory (NLDFT) model based on spherical cavity model1.

**Scanning electron microscopy (SEM)**: Surface morphology and elemental semi-quantitative analysis of the as-prepared catalysts were performed on a field emission scanning electron microscope (Hitachi SU8010, Hitachi, Japan). The test was carried out at an accelerating voltage of 5.0 kV with a working distance of 8–10 mm.

**Transmission Electron Microscopy (TEM)**: Microstructure, crystal phase and elemental distribution of the catalysts were characterized on a field emission transmission electron microscope (JEOL JEM-F200, JEOL, Japan) at an accelerating voltage of 200 kV. Elemental mapping was collected with an equipped energy dispersive X-ray spectrometer (EDS).

**Thermogravimetric analysis-differential scanning calorimetry (TGA-DSC)**: Thermal stability and phase transition behavior of the catalysts were tested on a simultaneous thermal analyzer (Mettler Toledo, Switzerland). The test was performed under Ar atmosphere with a gas flow rate of 50 mL min–1, the heating rate was 10 °C min–1, and the test temperature range was from room temperature to 1000 °C.

**Raman spectroscopy**: Raman spectra of the electrocatalysts were recorded on a laser confocal Raman spectrometer (LabRAM HR Evolution, Horiba, Japan) with a 532 nm excitation laser. The laser power was controlled below 5 mW to avoid sample damage, the spectral collection range was 100–3000 cm–1, the integration time was 10 s, and 3 scans were accumulated for each spectrum.

**Inductively coupled plasma optical emission spectrometry (ICP-OES)**: The elemental composition and content of the catalysts were quantitatively analyzed on an inductively coupled plasma optical emission spectrometer (Agilent 720ES, Agilent, USA). Before the test, the samples were completely digested by aqua regia via microwave digestion, diluted to the linear range, and tested on the machine. The element quantification was completed by the external standard method.

**Aberration-corrected high-angle annular dark-field scanning transmission electron microscopy (AC HAADF-STEM):** Atomic-level dispersion of copper species and nanocavity's structure of the catalysts were characterized on an aberration-corrected transmission electron microscope (JEOL JEM-ARM200F, JEOL, Japan) operated at an accelerating voltage of 200 kV. The samples were prepared by drop-casting ethanol-dispersed catalyst powder onto ultrathin holey carbon-coated copper grids, followed by vacuum drying at 60 °C for 12 h prior to testing. HAADF images were collected with a collection semi-angle of 68–280 mrad to ensure Z-contrast imaging of single copper atoms, with a spatial resolution of 0.08 nm.

**X-ray photoelectron spectroscopy (XPS)**: Surface elemental composition, chemical valence state and electronic structure of the catalysts were characterized on an X-ray photoelectron spectrometer (Thermo Scientific K-Alpha, Thermo Fisher, USA) with a monochromatic Al Kα radiation source (photon energy of 1486.6 eV). All binding energies were calibrated with the adventitious carbon C 1s peak at 284.8 eV, and the spectral data were processed by peak fitting with Avantage software.

**X-ray absorption fine structure spectroscopy (XAFS):** X-ray absorption near-edge structure (XANES) and extended X-ray absorption fine structure (EXAFS) spectra of the catalysts were collected at the Beamline 8-ID of the National Synchrotron Light Source II at Brookhaven National Laboratory. The spectra of Cu K-edge were all acquired in fluorescence mode with a passivated implanted planar silicon (PIPS) detector. The raw data were background-subtracted, normalized and fitted using ATHENA and ARTEMIS software, with Cu foils and standard oxides as reference samples.

**Ultraviolet-visible absorption spectroscopy (UV-vis):** Quantitative analysis of reaction by-products (including NH2OH, NH4+, NO2–, etc.) was performed on an ultraviolet-visible spectrophotometer (UV-2600, Shimadzu, Japan). The test wave UV-vis length range was 200–800 nm with a spectral resolution of 1 nm, the absorbance data were collected in a 1 cm quartz cuvette at room temperature, and the quantitative analysis was completed via the standard curve method.

**Solution nuclear magnetic resonance (NMR):** Qualitative and quantitative analysis of urea, reaction intermediates, and isotope labeling experiments were performed on liquid-state and solid-state NMR spectrometers. Liquid-state 1H, 15N, and 13C NMR spectra were collected on a Bruker Ascen 400 MHz NMR spectrometer at 25 °C. For urea quantification, 50 μL of post-electrolysis electrolyte was mixed with 600 μL of DMSO-d6, with 0.1 μL dimethyl sulfoxide (DMSO) as the internal standard, and ¹H NMR spectra were acquired with water suppression via the excitation sculpting method. For 15N and 13C isotope labeling experiments to verify the C–N coupling source, electrolysis was performed with 15N-labeled KNO3 and 13C-labeled NaHCO3 as the sole nitrogen and carbon sources, respectively; post-reaction electrolytes were subjected to 15N NMR and 13C NMR analysis to confirm the origin of nitrogen and carbon in the synthesized urea. Solid-state 13C and 15N cross-polarization magic angle spinning (CP/MAS) NMR spectra were recorded at a spinning rate of 12 kHz, to identify the purity of vacuum-evaporated solid urea product and rule out organic by-products.

**Temperature programmed desorption (TPD)**: CO and NO adsorption-desorption properties of the catalysts were tested on an automatic chemisorption analyzer (AutoChem II 2920, Micromeritics, USA) equipped with a thermal conductivity detector (TCD) and a mass spectrometer (MS). Approximately 100 mg of catalyst sample was loaded into a U-shaped quartz tube, pretreated at 200 °C under high-purity He flow (50 mL min–1) for 2 h to remove surface-adsorbed impurities and water, then cooled to 50 °C under He atmosphere. Subsequently, the sample was exposed to a flow of 10 vol% CO/He or 10 vol% NO/He (50 mL min–1) for 2 h to achieve saturated adsorption, followed by purging with pure He (50 mL min–1) for 1 h to eliminate physically adsorbed gaseous species. Finally, TPD curves were recorded by heating the sample from 50 °C to 800 °C at a ramp rate of 10 °C min–1 under continuous He flow (30 mL min–1), with the desorbed CO and NO signals monitored in real time by the mass spectrometer.

**Electron paramagnetic resonance spectroscopy (EPR)**: Qualitative and quantitative characterizations of free radicals during the reaction were performed on an electron spin resonance spectrometer (JEOL FA-200, JEOL, Japan), with 5,5-dimethyl-1-pyrroline-N-oxide (DMPO) as the radical trapping agent. The in-situ radical signal during electrolysis was collected in real time with a capillary in-situ cell.

**In-situ Raman spectroscopy:** Dynamic evolution of reaction intermediates on the catalyst surface during electrocatalytic C–N coupling was monitored on a laser confocal Raman spectrometer (LabRAM HR Evolution, Horiba, Japan) coupled with a custom-built three-electrode in-situ electrochemical cell. The spectrometer was equipped with a 532 nm excitation laser, with the laser power controlled below 5 mW to avoid sample damage and photothermal interference. The in-situ cell featured a polytetrafluoroethylene (PTFE) body with a 1 mm-thick quartz optical window, a catalyst-loaded carbon paper working electrode (1 × 1 cm2), a Pt wire counter electrode, and a saturated calomel electrode (SCE). The electrolyte was 0.1 M KHCO3 + 0.1 M KNO3, continuously circulated through the cell at 5 mL min–1, with saturated CO2 fed at 20 mL min–1 throughout the test. Raman spectra were collected in the range of 100–3000 cm–1 at applied potentials from 0 V to –1.1 V vs. reversible hydrogen electrode (RHE).

**In-situ attenuated total reflection surface-enhanced infrared absorption spectroscopy (ATR-SEIRAS):** Dynamic evolution of reaction intermediates during the electrocatalytic process was monitored on an in-situ ATR-SEIRAS spectrometer (Bruker Vertex 70v, Bruker, Germany) equipped with a liquid nitrogen-cooled MCT detector. The spectra were collected in the range of 1000–4000 cm–1. A three-electrode in-situ electrolytic cell with a Si prism as the working electrode substrate was adopted, and the infrared spectra were collected in real time at different applied potentials from 0 V to –1.1 V vs. RHE.

**Section 2. Synthesis and characterization**

**Section 2.1. Synthesis and characterization of ZIF-Cu**

1.97 g of 2-methylimidazole was dissolved in a mixed solvent of 75 mL methanol and 5 mL deionized water, and the mixture was stirred at 300 rpm for 30 min at room temperature. The addition of deionized water moderately adjusted the solvent polarity to favor uniform nucleation of ZIF crystals and suppress the formation of oversized aggregates. 1.695 g of zinc nitrate hexahydrate, 80 mg of copper nitrate trihydrate, and 50 mg of polyvinylpyrrolidone (PVP, K30) as a dispersant were dissolved in 80 mL of methanol, and the mixture was sonicated at 300 W and 40 kHz for 45 min to form a clear homogeneous solution. PVP K30 chelated with Cu2+ ions to prevent their local aggregation during ZIF crystallization.

The metal salt solution was added dropwise into the imidazole solution at 2 mL min–1 via a peristaltic pump to avoid sudden supersaturation of metal ions and irregular crystal growth. The resulting suspension was transferred to a sealed glass reactor, maintained statically at 60 °C for 12 h, and then stirred at 200 rpm for another 12 h to promote the growth of well-faceted ZIF crystals and enhance Cu incorporation into the ZIF lattice. The product was collected by centrifugation at 8000 rpm for 15 min, washed with 50 mL of methanol three times, and vacuum-dried at 60 °C and 2.67 Pa for 24 h to remove residual solvent and prevent pore blockage.

For comparison, ZIF-Fe and ZIF-Co were synthesized via the same procedure, with copper nitrate trihydrate replaced by equimolar iron nitrate enneahydrate (112 mg) and cobalt nitrate hexahydrate (72 mg), respectively, to maintain the same metal ion molar concentration.


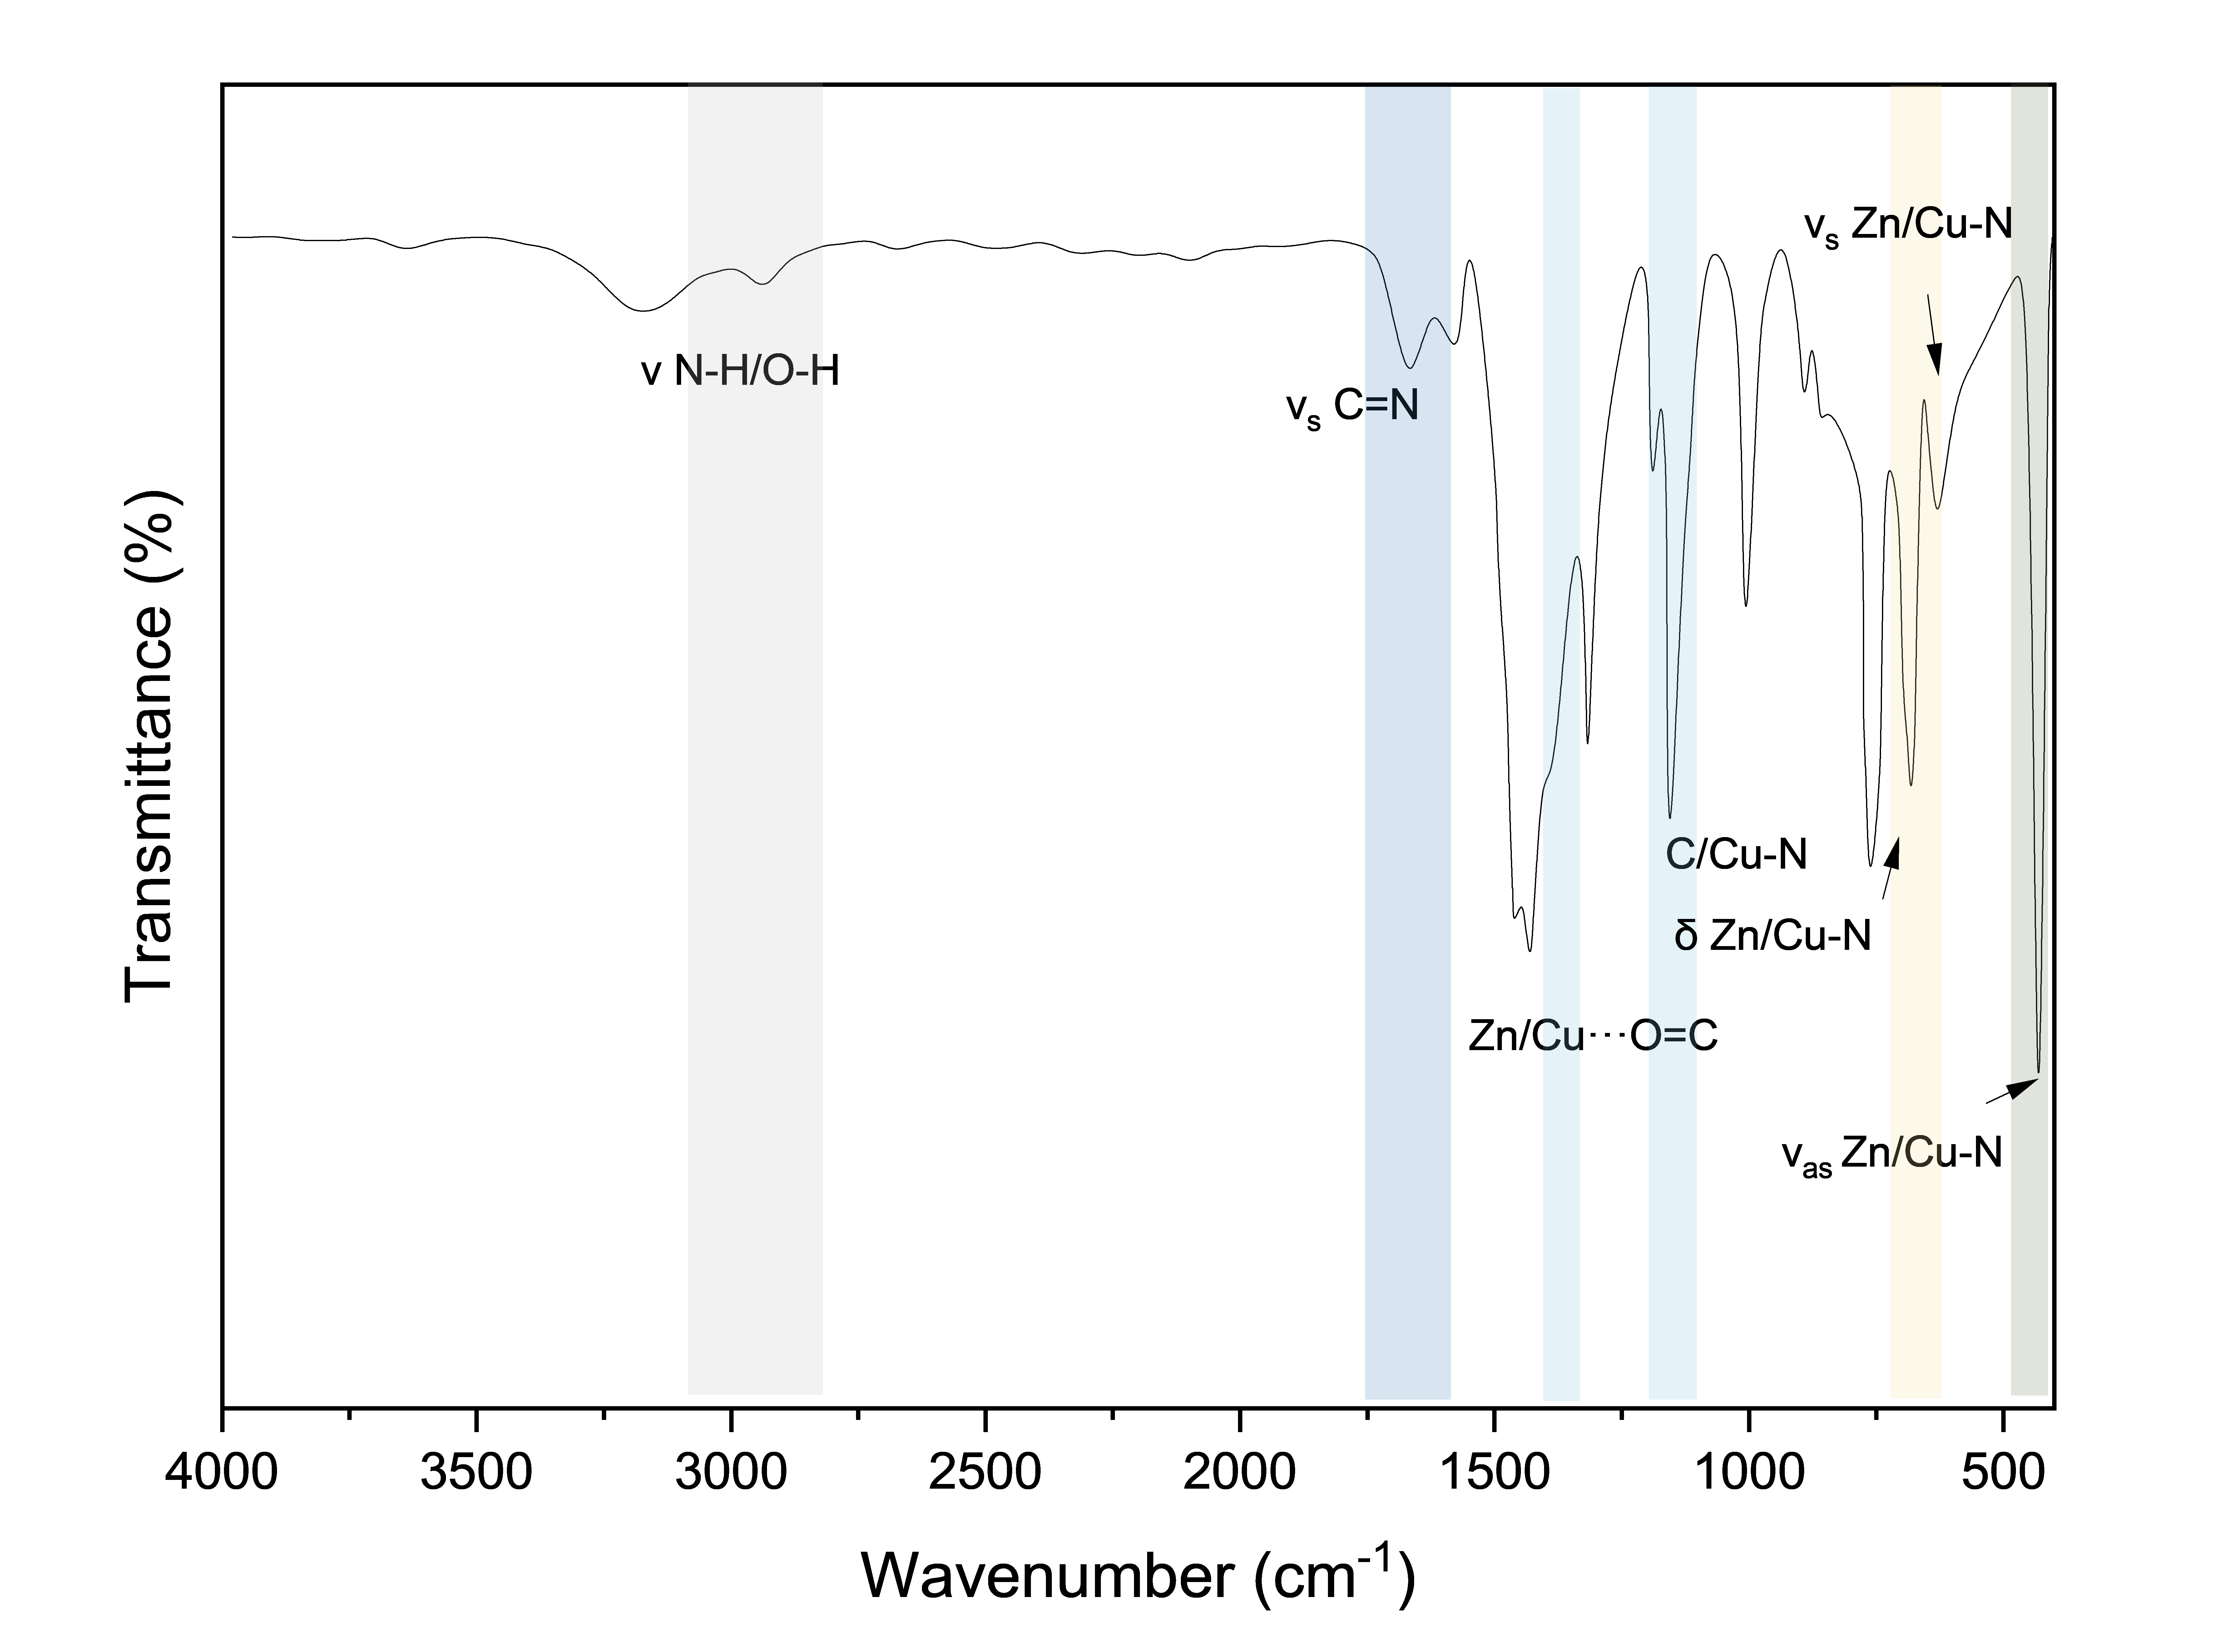


**Supplementary Fig. 1**. Fourier transform infrared (FT-IR) spectrum of ZIF-Cu (KBr pellet method, 400–4000 cm–1).

FT-IR spectroscopy was used to verify the successful construction of the Cu-doped zeolitic imidazolate framework (ZIF-Cu) precursor in the range of 400–4000 cm–1. The broad absorption band at ~3000 cm–1 is ascribed to O–H stretching of physiosorbed water in the porous ZIF structure and N-H stretching of the 2-methylimidazole (MeIM) linker. The intense, well-defined peak at 1500–1700 cm–1 corresponds to the characteristic C=N stretching of the imidazole ring, a fingerprint marker for the formation of the ZIF topological framework2. Distinct medium-strong absorption peaks at 420–480 cm–1 and 600 cm–1 are attributed to the symmetric and asymmetric stretching vibrations of Zn-N and Cu–N coordination bonds, respectively3. These shifted peaks from the pristine Zn-N vibration of pure ZIF-8 directly confirm that Cu2+ ions have been successfully incorporated into the ZIF lattice by substituting partial Zn nodes, forming stable Cu–N coordination bonds without phase-separated aggregates.


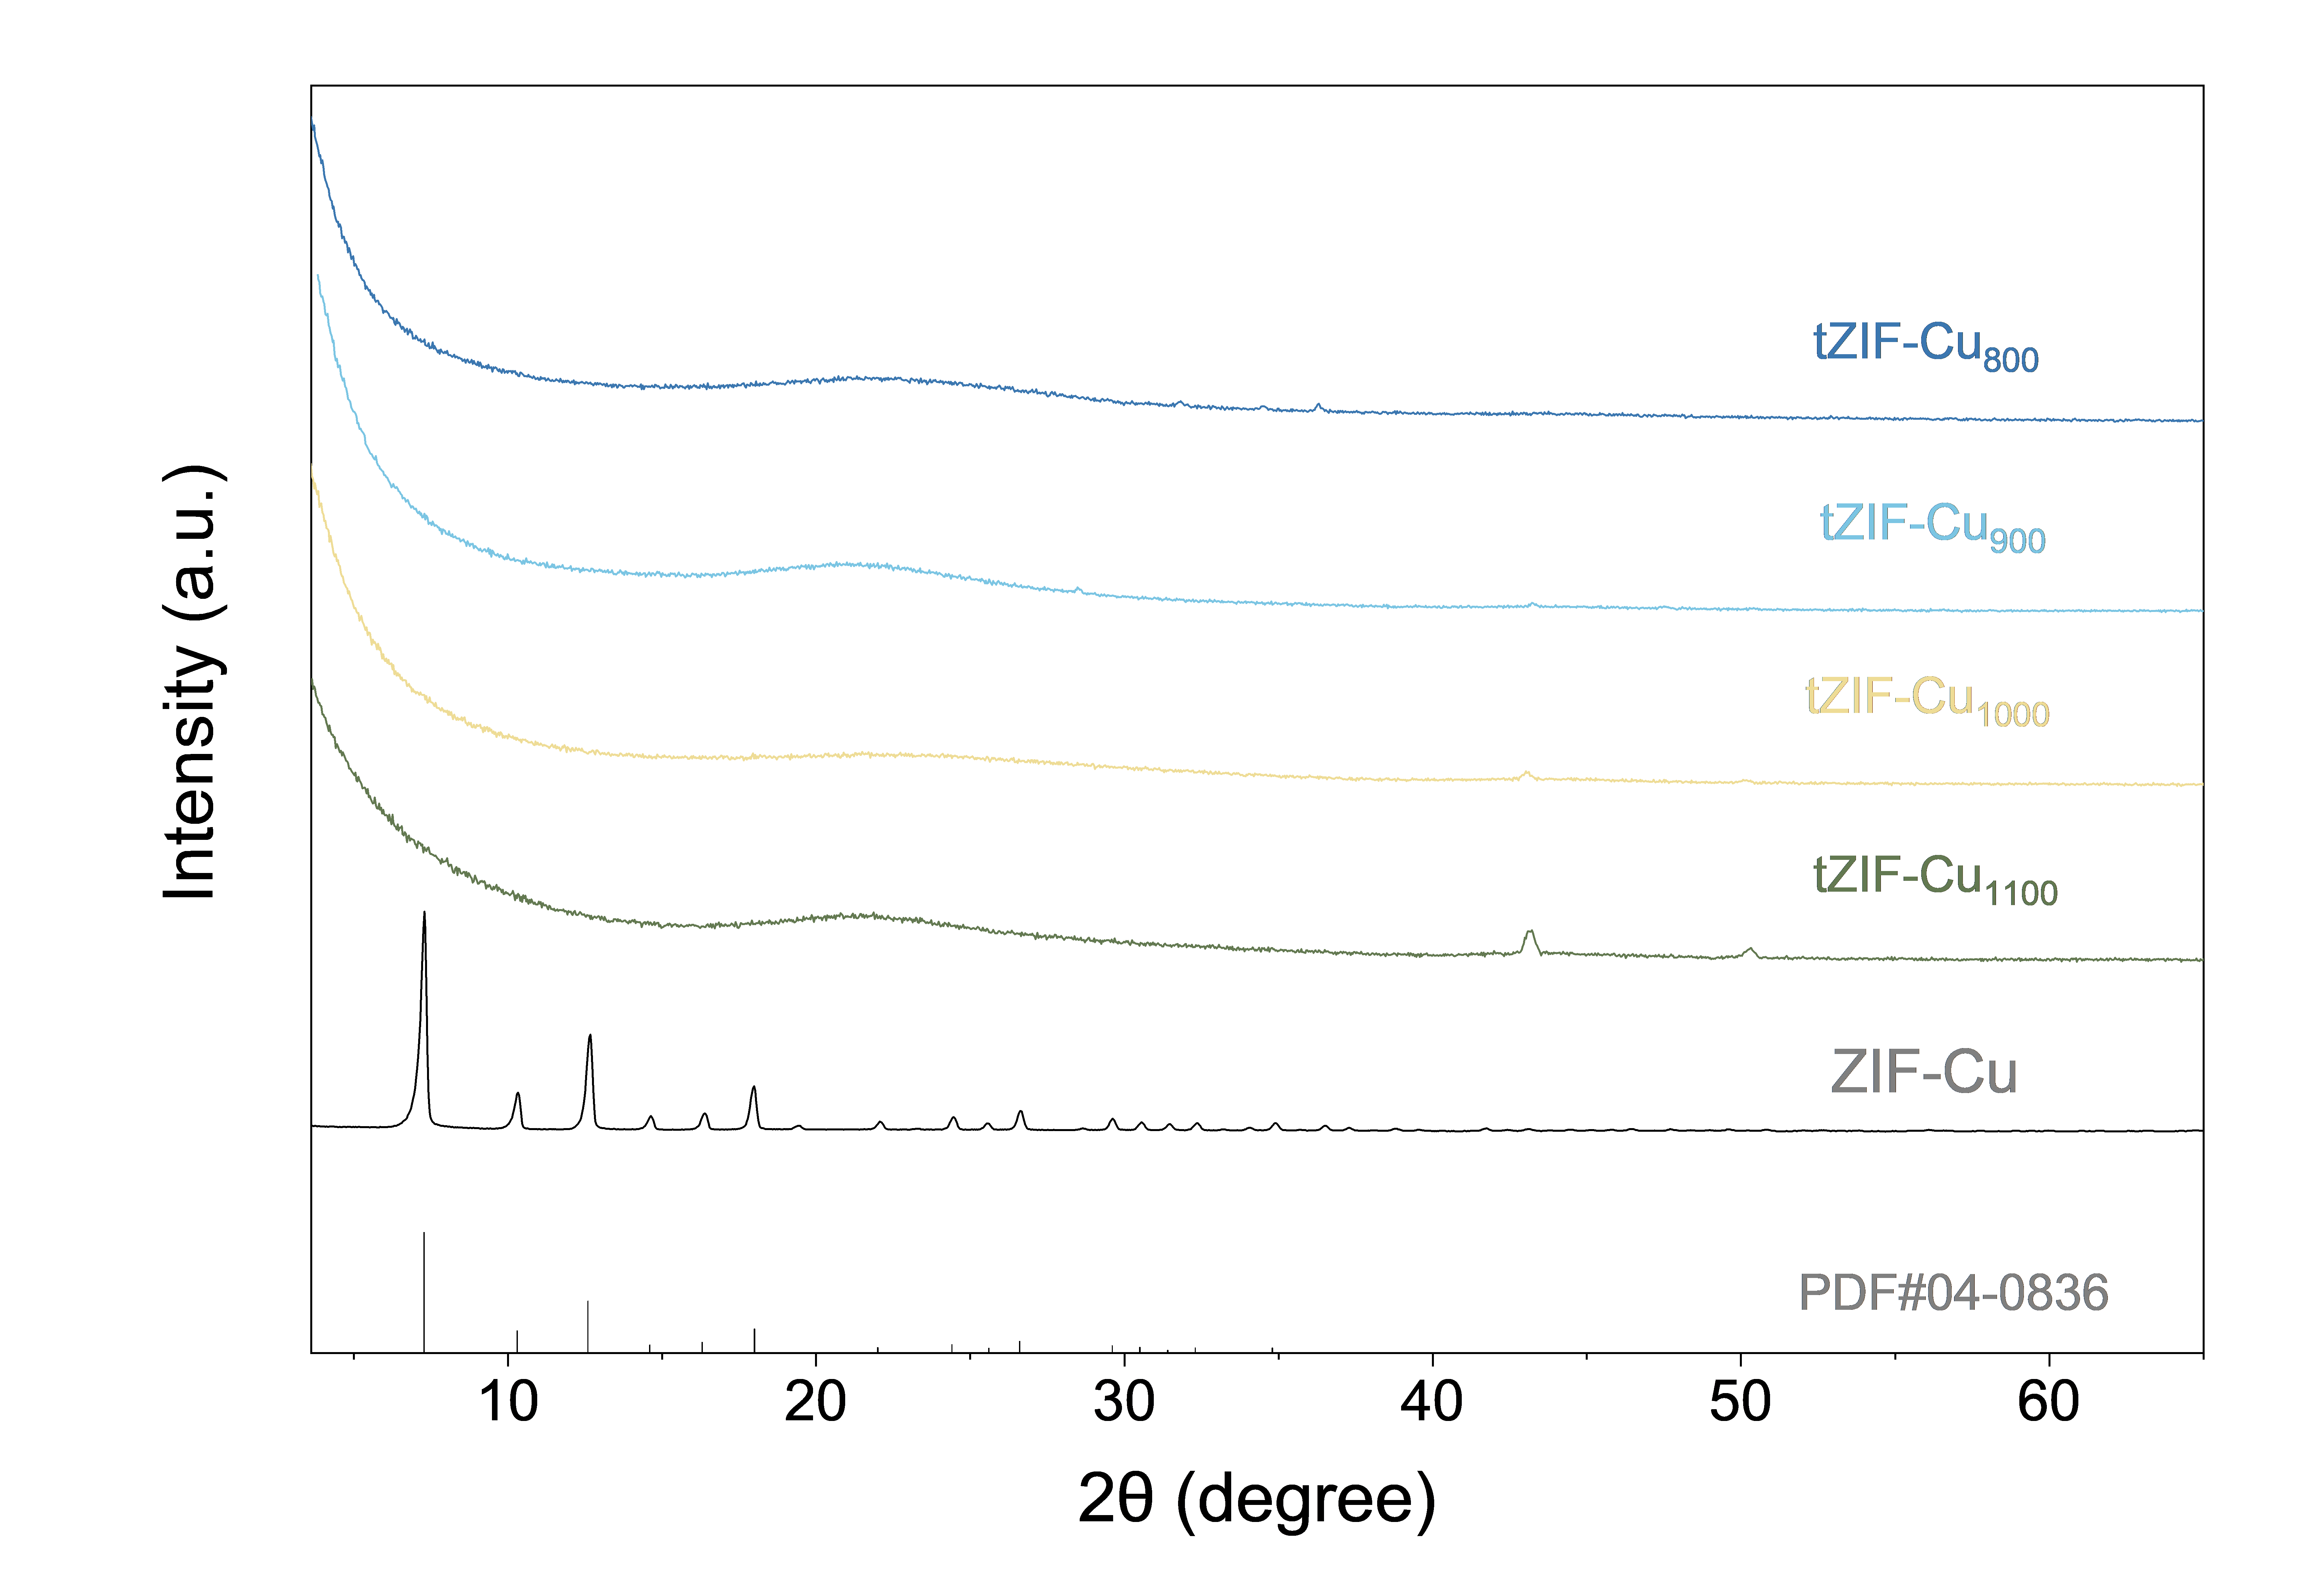


**Supplementary Fig. 2**. Powder X-ray diffraction (XRD) patterns of ZIF-Cu precursor and thermally sculpted tZIF-Cu samples (tZIF-Cu800, tZIF-Cu900, tZIF-Cu1000, tZIF-Cu1100) (Cu Kα radiation, λ=0.15406 nm, 2θ=10°–80°). The standard pattern of ZIF-8 (PDF#04-0836) is shown as a reference.

Powder X-ray diffraction (XRD) patterns elucidate the structural evolution of the ZIF-Cu precursor and its thermally sculpted derivatives (tZIF-Cu) across pyrolysis temperatures. The as-synthesized ZIF-Cu exhibits a series of well-resolved, sharp diffraction peaks at 2θ = 7.3°, 10.4°, 12.7°, and 18.0°, in perfect agreement with the standard sodalite (SOD) topology of ZIF-8 (PDF#04-0836)4,5. This confirms the successful construction of a highly crystalline zeolitic imidazolate framework, where Cu doping introduces no impurity phases or disruption to the intrinsic ZIF lattice structure.

All thermally treated tZIF-Cu samples show complete disappearance of the characteristic ZIF diffraction peaks, with only a broad, weak hump centered at 2θ~25°corresponding to the (002) plane of low-graphitization amorphous carbon6. This indicates the full collapse of the ZIF framework’s long-range periodic crystalline structure during high-temperature pyrolysis, concurrent with the formation of a nitrogen-doped carbon matrix. Notably, no sharp diffraction peaks assignable to crystalline Zn, ZnO, Cu, CuO, or Cu2O were detected across the entire 2θ range, verifying the absence of aggregated metal/metal oxide nanoclusters. This aligns with the atomically dispersed Cu sites observed via AC HAADF-STEM, confirming that Cu species remain stably anchored in the carbon scaffold without sintering during thermal sculpting.


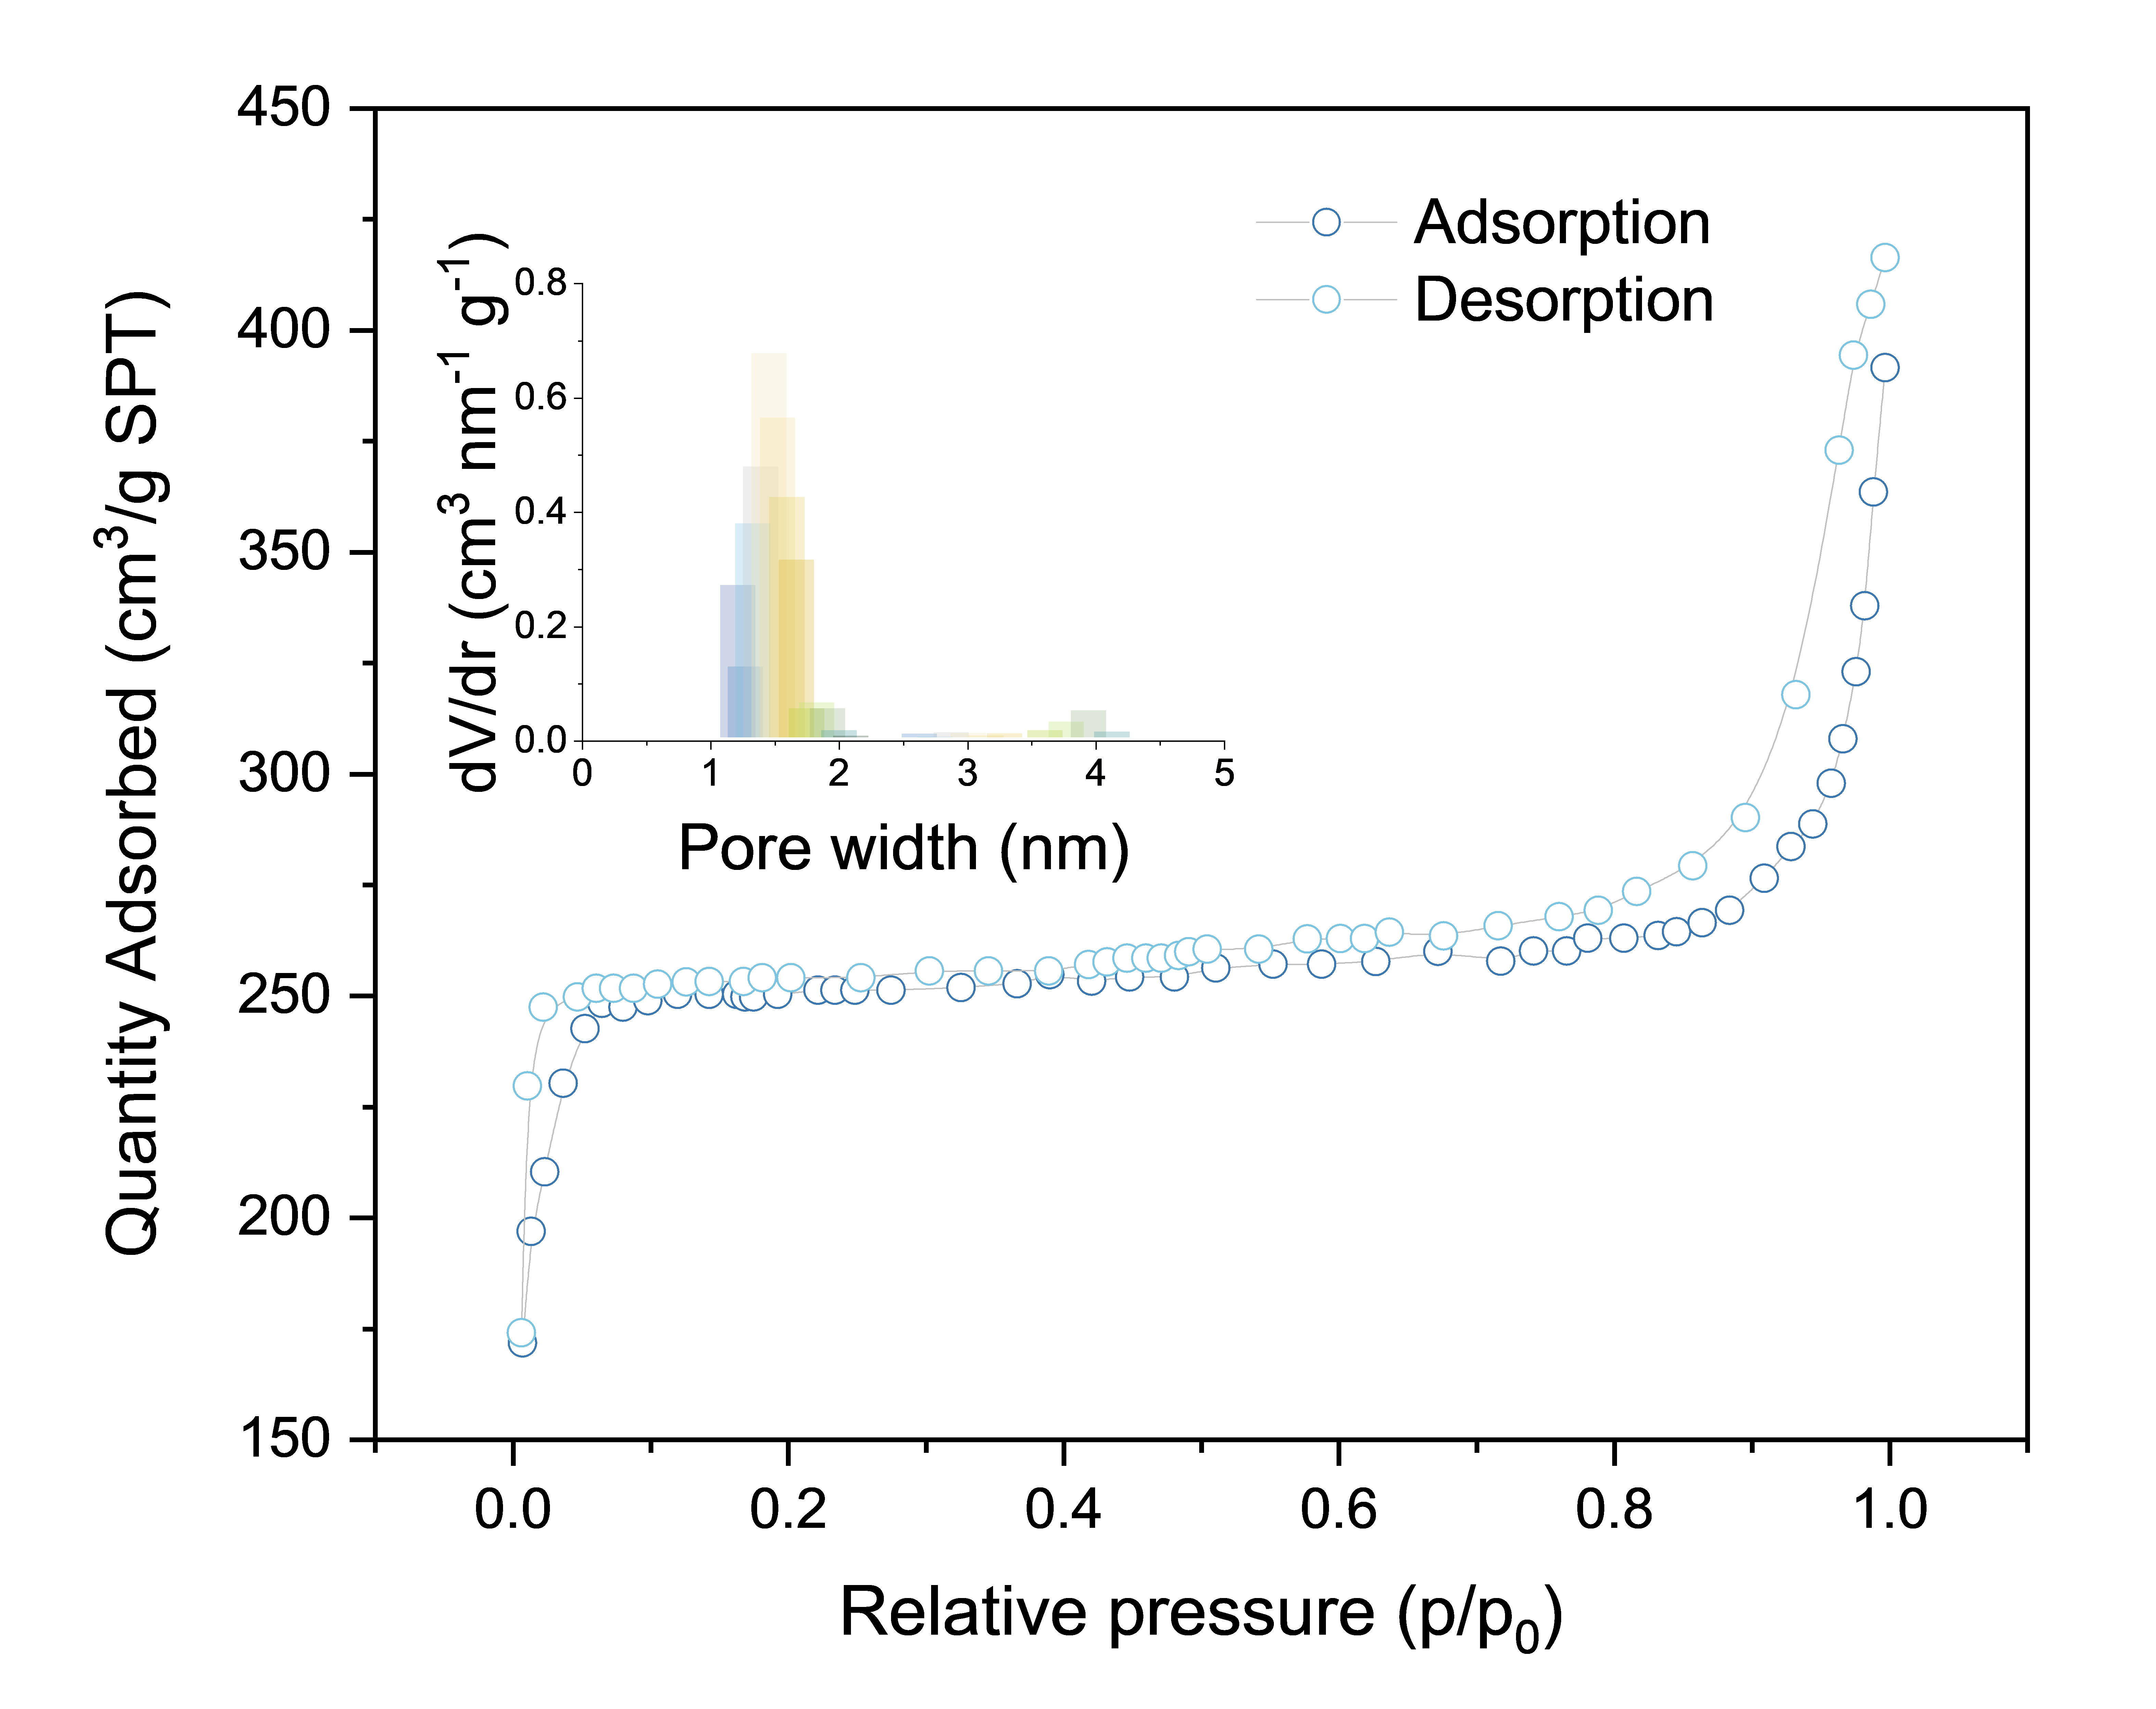


**Supplementary Fig. 3**. N2 adsorption-desorption isotherms (77 K) and corresponding pore size distribution (NLDFT model) of ZIF-Cu.

The N2 adsorption-desorption isotherms and corresponding pore size distribution profile elucidate the textural properties of the as-synthesized ZIF-Cu precursor. The isotherm exhibits a typical Type I behavior per IUPAC classification, evidenced by a sharp, steep nitrogen uptake at relative pressure (p/p0) < 0.1, a signature of the well-developed microporous structure inherent to crystalline zeolitic imidazolate frameworks. A gradual rise in adsorption volume at p/p0 = 0.8–1.0, coupled with slight desorption hysteresis, indicates a minor fraction of intercrystalline mesopores from the stacking of ZIF-Cu microcrystals. Brunauer-Emmett-Teller (BET) analysis yields a high specific surface area of 1748.5 m2 g–1, confirming the high porosity and structural integrity of the ZIF lattice. The pore size distribution (PSD) was derived from the N2 adsorption isotherm at 77 K using the NLDFT method:

where is the experimental N2 adsorption capacity (cm3 g–1), is the relative pressure, is the NLDFT kernel for a cylindrical/slit pore of diameter D (cm3 g–1), is the pore size distribution (cm3 g–1 nm–1), and *D* is the pore diameter (nm).

The NLDFT calculated pore size distribution (inset) reveals a dominant narrow pore size distribution centered at ~1.5 nm1, matching the intrinsic micropore dimension of the SOD-type ZIF-8 framework.


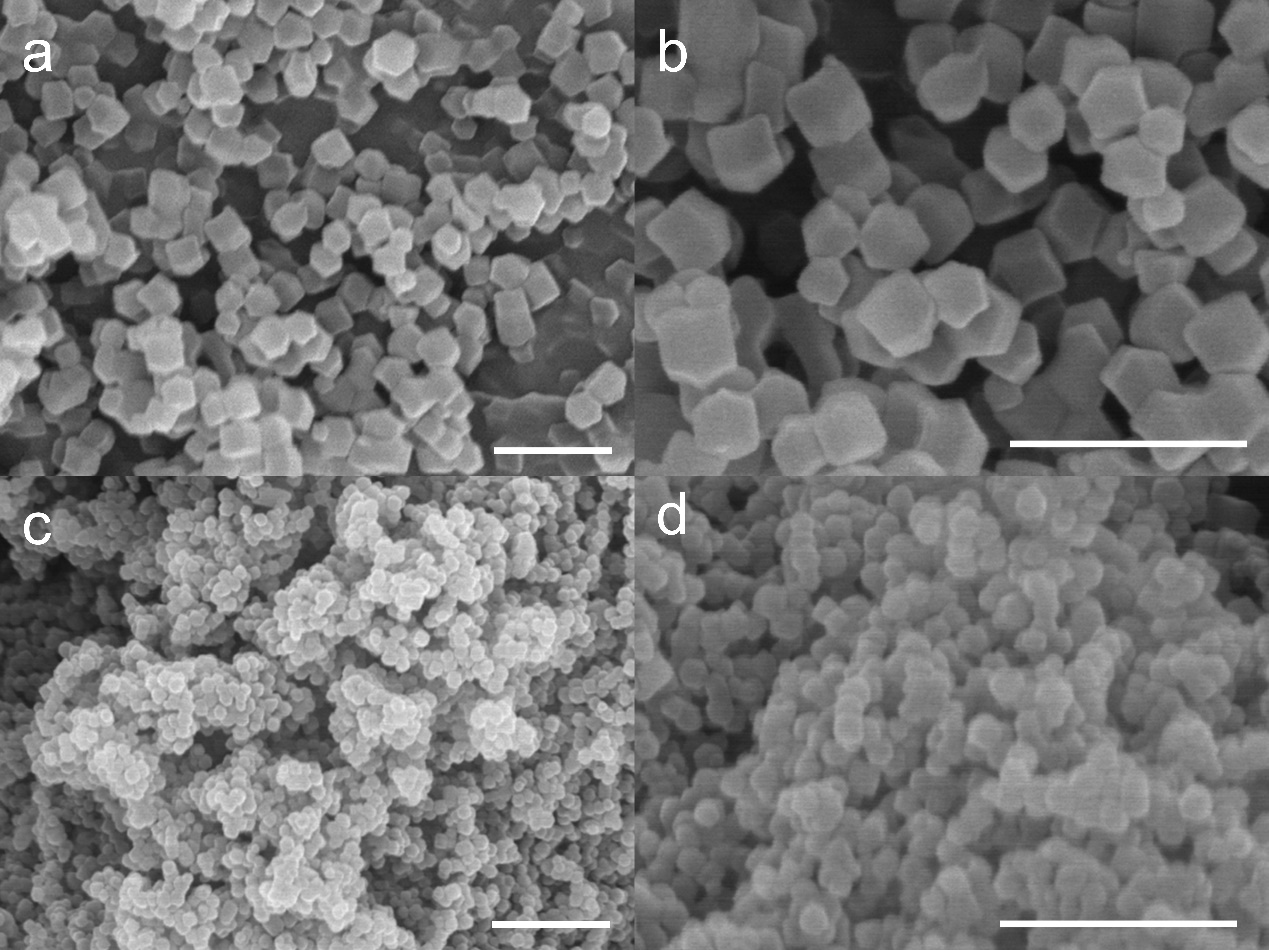


**Supplementary Fig. 4**. Scanning electron microscopy (SEM) images of (a, b) pristine ZIF precursor and (c, d) ZIF-Cu. All scale bars are 250 nm.

Scanning electron microscopy (SEM) reveals the morphological evolution of the ZIF framework through Cu doping and thermal processing. Pristine ZIF and the as-synthesized ZIF-Cu precursor display uniform, well-defined rhombic dodecahedral microcrystals with smooth facets and narrow size distribution, characteristic of the sodalite topology of ZIF-8 (Supplementary Fig. 4a, b). Cu2+ ions (0.71 Å ionic radius) partially substitute Zn2+ (0.74 Å) in ZIF-8's tetrahedral nodes, disrupting the regular coordination environment and growth kinetics. This substitution increases nucleation density while inhibiting anisotropic crystal growth, leading to smaller particles. Meanwhile, Cu2+-imidazolate coordination modulates surface energy, favoring spherical/irregular morphologies over the thermodynamically stable dodecahedral structure. The degree of spheroidization and size reduction depends on Cu2+ concentration, reaction conditions, and substitution extent (Supplementary Fig. 4c, d).


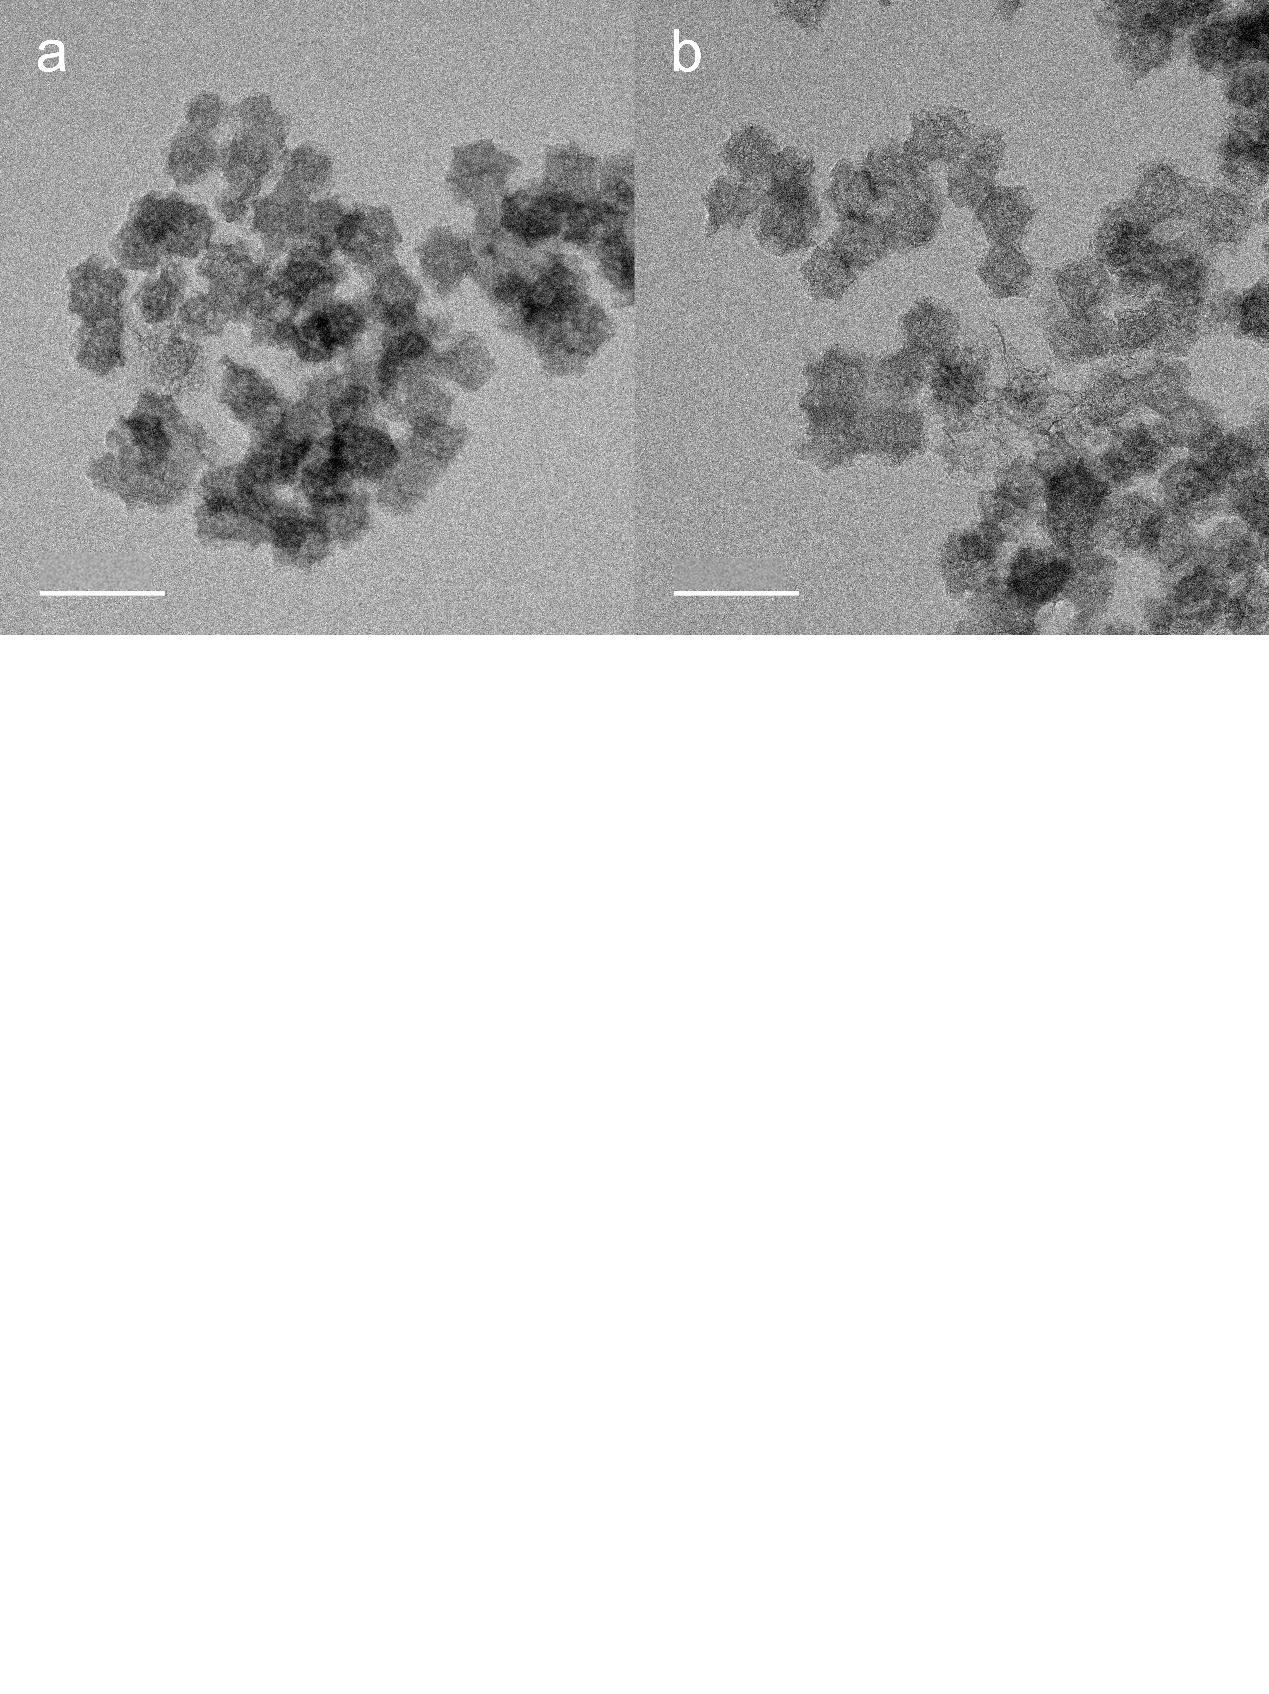


**Supplementary Fig. 5**. Transmission electron microscopy (TEM) images of (a) ZIF precursor and (b) ZIF-Cu. All scale bars are 50 nm.

TEM further elucidates the microstructure of ZIF precursor and ZIF-Cu. No high-contrast crystalline nanoparticles corresponding to Cu/Zn metals or their oxides are observed, in full agreement with XRD results.

**Section 2.2. Synthesis and characterization of tZIF-Cu**


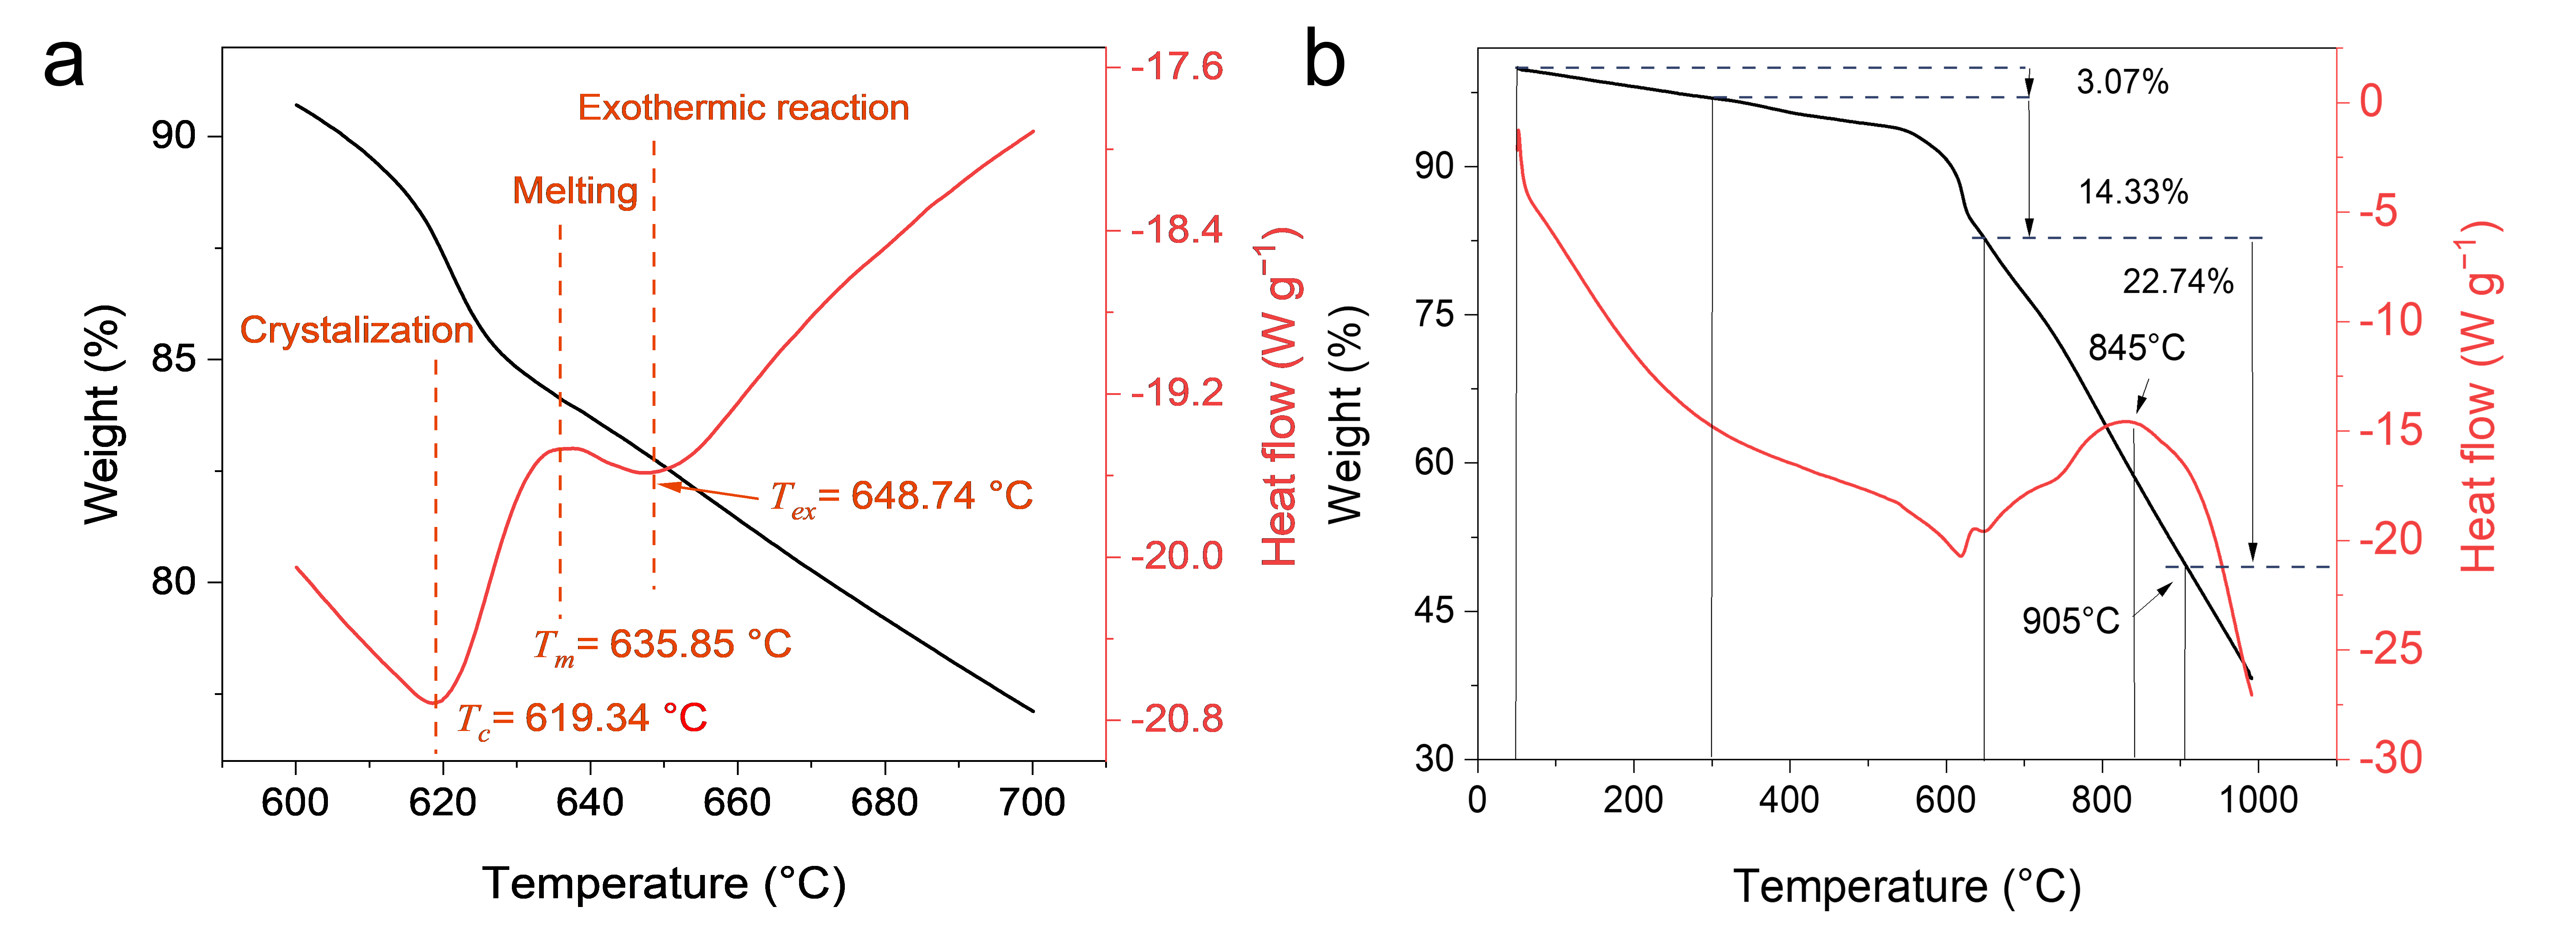


**Supplementary Fig. 6**. Thermogravimetric analysis-differential scanning calorimetry (TGA-DSC) curves of ZIF-Cu precursor: (a) partial enlarged view in 600–700 °C, (b) full view in 50–1000 °C.

As shown in Supplementary Fig. 6, the TGA curve of ZIF-Cu presents three main weight loss stages. The first stage (50–300 °C, 3.07% mass loss) corresponds to desorption of adsorbed water and residual organics, with no distinct DSC thermal effect. The second stage (300–650 °C, total 14.33% mass loss) shows three DSC signals at 619.34 °C (crystallization), 635.85 °C (melting) and 648.74 °C (exothermic linker decomposition), attributed to gradual degradation of 2-methylimidazole linkers. The third stage (650–905 °C, 22.74% mass loss) exhibits a broad endothermic peak at 845.2 °C and a sharp peak at 905 °C, assigned to pre-gasification of reduced Zn species and boiling gasification of Zn nodes, respectively.

The Zn pre-gasification at 845.2 °C (below its 905 °C standard boiling point) arises from flowing Ar atmosphere, which continuously carries away Zn vapor and breaks the gas-liquid equilibrium. This low-temperature pre-gasification forms abundant micropore nuclei in the carbon matrix, facilitating the subsequent construction of uniform 1.5–1.8 nm nanoconfined cavities at 900 °C.

**Detailed synthesis process for tZIF-Cus:** Dried ZIF-Cu powder (1.0 g) was ground in a metal-free agate mortar, sieved through a 200-mesh screen, and placed in a horizontal tube furnace for pyrolysis under continuous high-purity Ar flow to prevent oxidation. A three-stage pyrolysis protocol was designed to precisely match the above thermal behavior, enabling controllable framework evolution and active site construction. Stage I (solvent desorption): The furnace was heated to 300 °C at 2 °C min–1 (50 mL min–1 Ar flow) and held for 2 h to fully remove residual solvents without structural cracking. Stage II (ligand decomposition): The Ar flow was increased to 100 mL min–1, followed by heating to 600 °C at 1 °C min–1 and holding for 3 h, to achieve gradual ligand decomposition and pre-carbonized skeleton formation without burst gas-induced structural damage. Stage III (targeted structure evolution): Differentiated temperature-ramp, isothermal hold and stepwise cooling protocols were designed for final pyrolysis temperatures of 800–1100 °C (100 mL min–1 Ar flow throughout) to balance Cu–N4 active site construction and structural stability, avoiding thermal stress-induced carbon matrix cracking.

Specific protocols for each sample are as follows:

tZIF-Cu800: Heated from 600 °C to 800 °C at 2 °C min–1, held for 3 h, then cooled to 200 °C at 3 °C min–1 followed by natural cooling, to enable uniform Cu–N4 reconstruction without metal agglomeration.

tZIF-Cu900: Heated from 600 °C to 850 °C at 3 °C min–1, then to 900 °C at 1 °C min–1, held for 2 h, then cooled to 600 °C at 2 °C min–1 and to 200 °C at 4 °C min–1 followed by natural cooling, to achieve controlled Zn vapor etching and Cu–N4 site stabilization.

tZIF-Cu1000: Heated from 600 °C to 900 °C at 5 °C min–1, held for 1 h, then to 1000 °C at 2 °C min–1, held for 2 h, then cooled to 700 °C at 1 °C min–1, held for 30 min, to 300 °C at 3 °C min–1, and to room temperature at 5 °C min–1, to pre-anchor active sites during moderate graphitization.

tZIF-Cu1100: Heated from 600 °C to 900 °C at 5 °C min–1 (1 h hold), to 1050 °C at 3 °C min–1, held for 30 min, then to 1100 °C at 1 °C min–1, held for 1 h, then cooled to 800 °C at 0.5 °C min–1, held for 1 h, to 400 °C at 2 °C min–1, to 100 °C at 4 °C min–1 followed by natural cooling, to minimize Cu sintering and N volatilization.


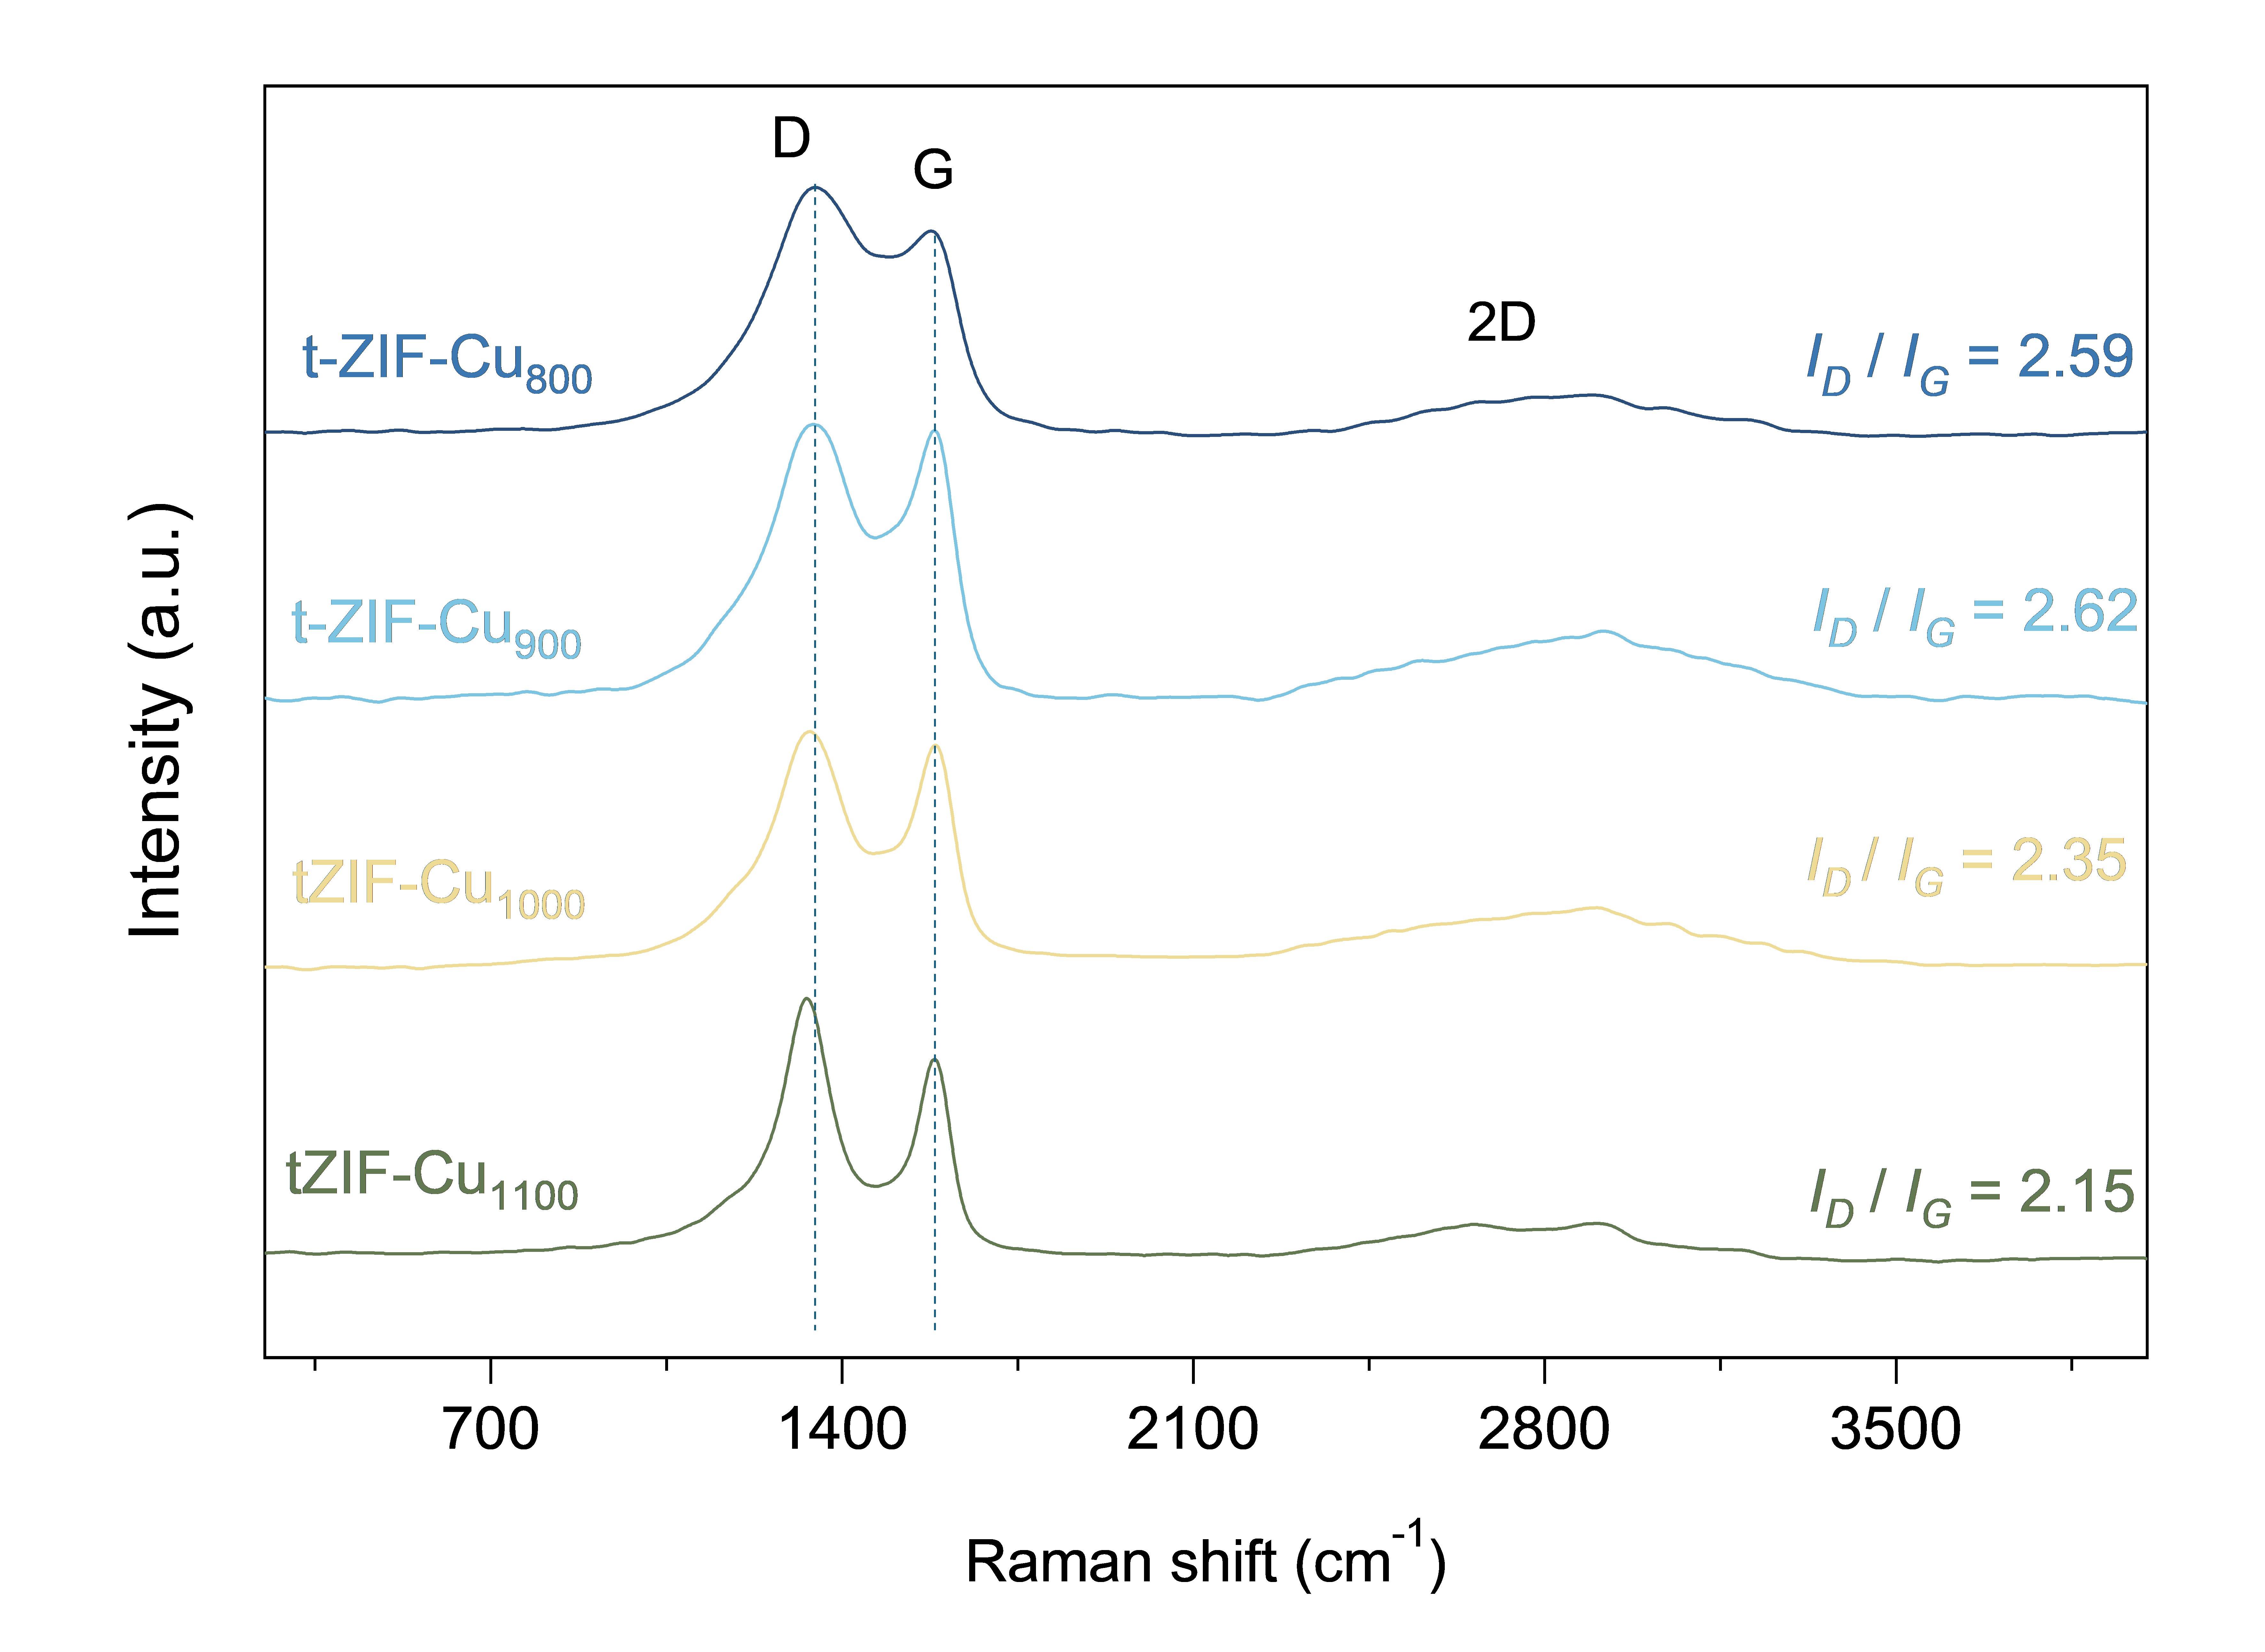


**Supplementary Fig. 7**. Raman spectra of tZIF-Cu800, tZIF-Cu900, tZIF-Cu1000 and tZIF-Cu1100 (532 nm excitation laser, 100–3000 cm–1). The intensity ratio of D-band to G-band (ID/IG) is labeled for each sample.

Raman spectroscopy provides direct insight into the evolution of carbon structural order during thermal pyrolysis of ZIF-Cus. All tZIF-Cus exhibit two characteristic bands at ~1350 cm–1 (D-band, ring-breathing mode of carbon) and ~1580 cm–1 (G-band, phonon of sp2-bonded carbon atoms)7, alongside a broad 2D band at 2700–2900 cm–1 confirming the formation of a nitrogen-doped carbon scaffold8.

The calculated ID/IG ratios follow a distinct trend of 2.59 (tZIF-Cu800), 2.62 (tZIF-Cu900), 2.35 (tZIF-Cu1000), and 2.15 (tZIF-Cu1100). The initial rise from 800 to 900 °C reflected the generation of abundant structural defects and edge sites during Zn volatilization and linker carbonization9,10. The subsequent decline above 900 °C indicated the onset of graphitization, as elevated temperatures drive the rearrangement of sp² carbon domains, reducing defect density and promoting long-range structural order. This moderate evolution of ID/IG confirms a controlled balance between defect-rich active sites and graphitic conductivity, critical for efficient electrocatalytic performance.


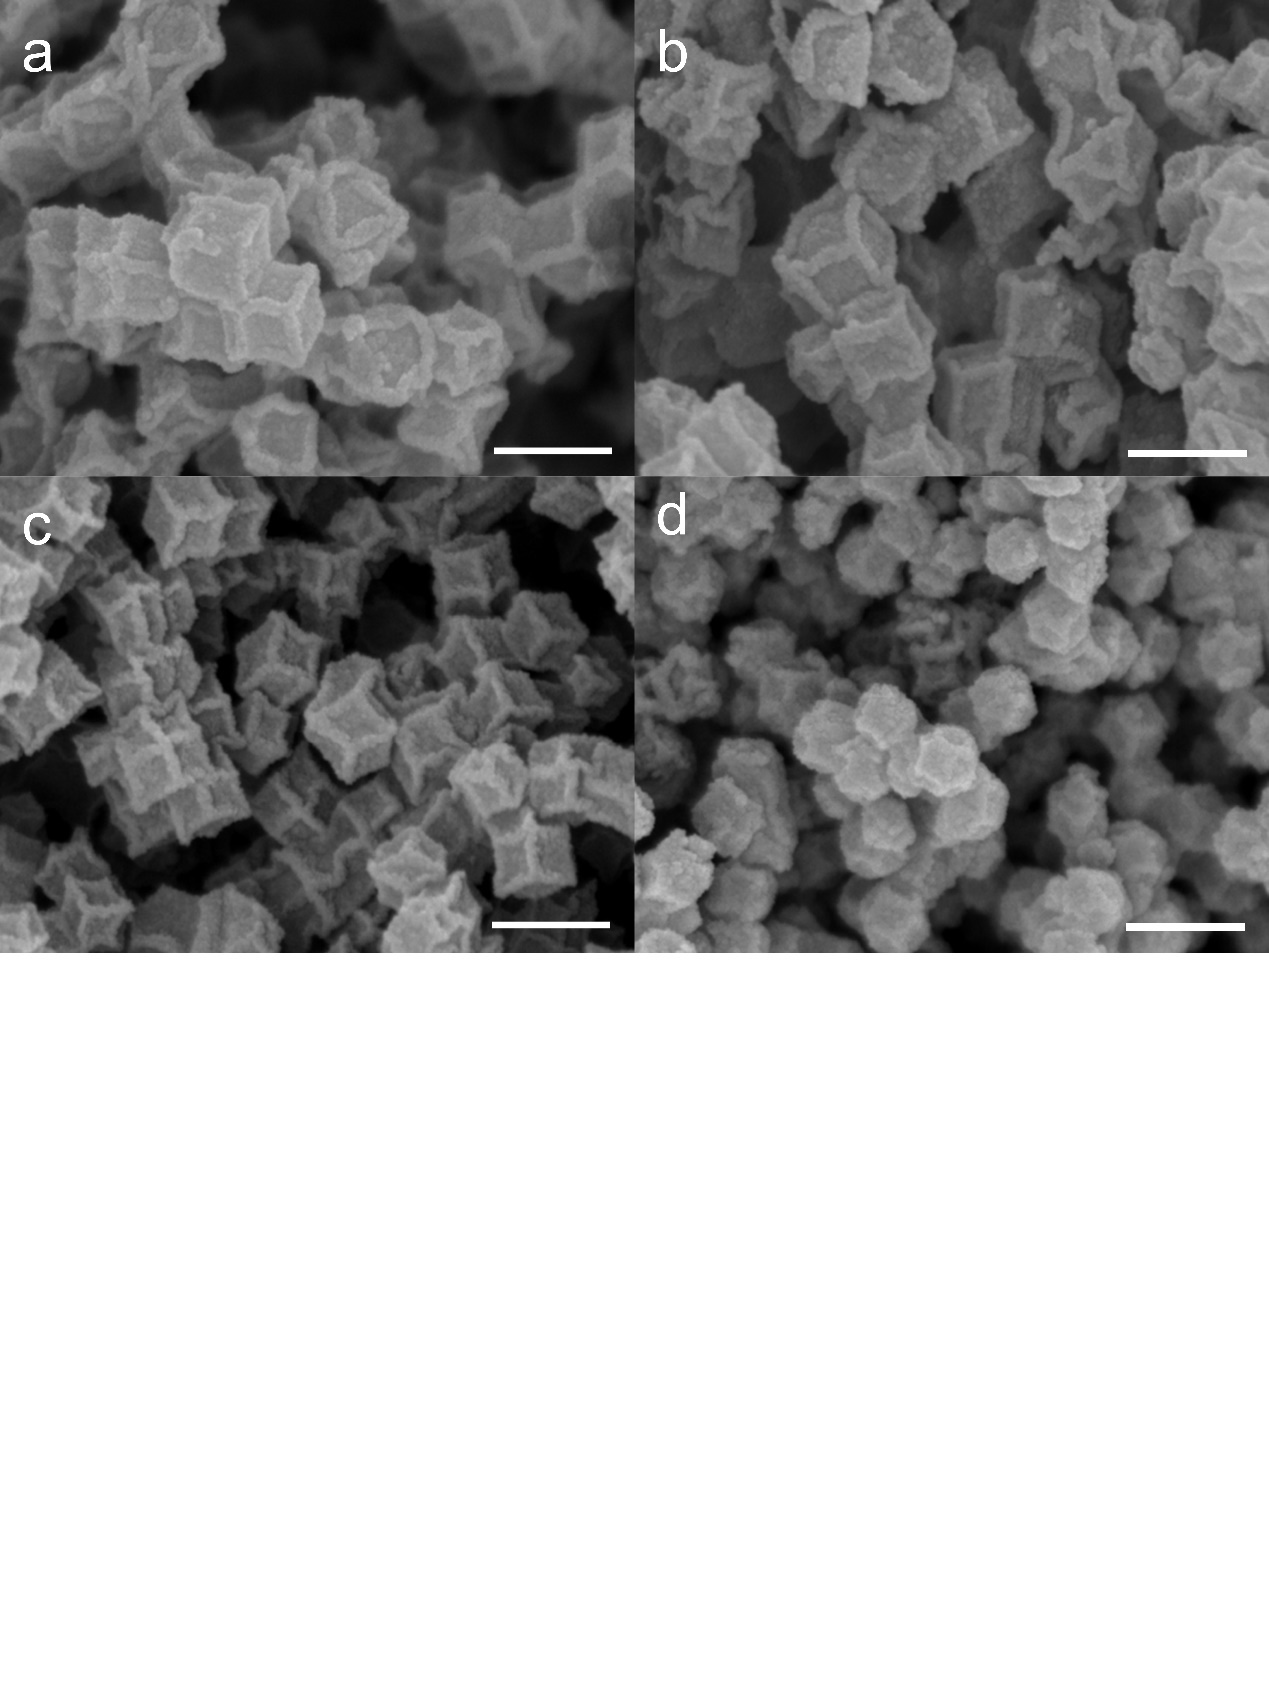


**Supplementary Fig. 8**. Scanning electron microscopy (SEM) images of (a) tZIF-Cu800, (b) tZIF-Cu900, (c) tZIF-Cu1000 and (d) tZIF-Cu1100. All scale bars are 250 nm.


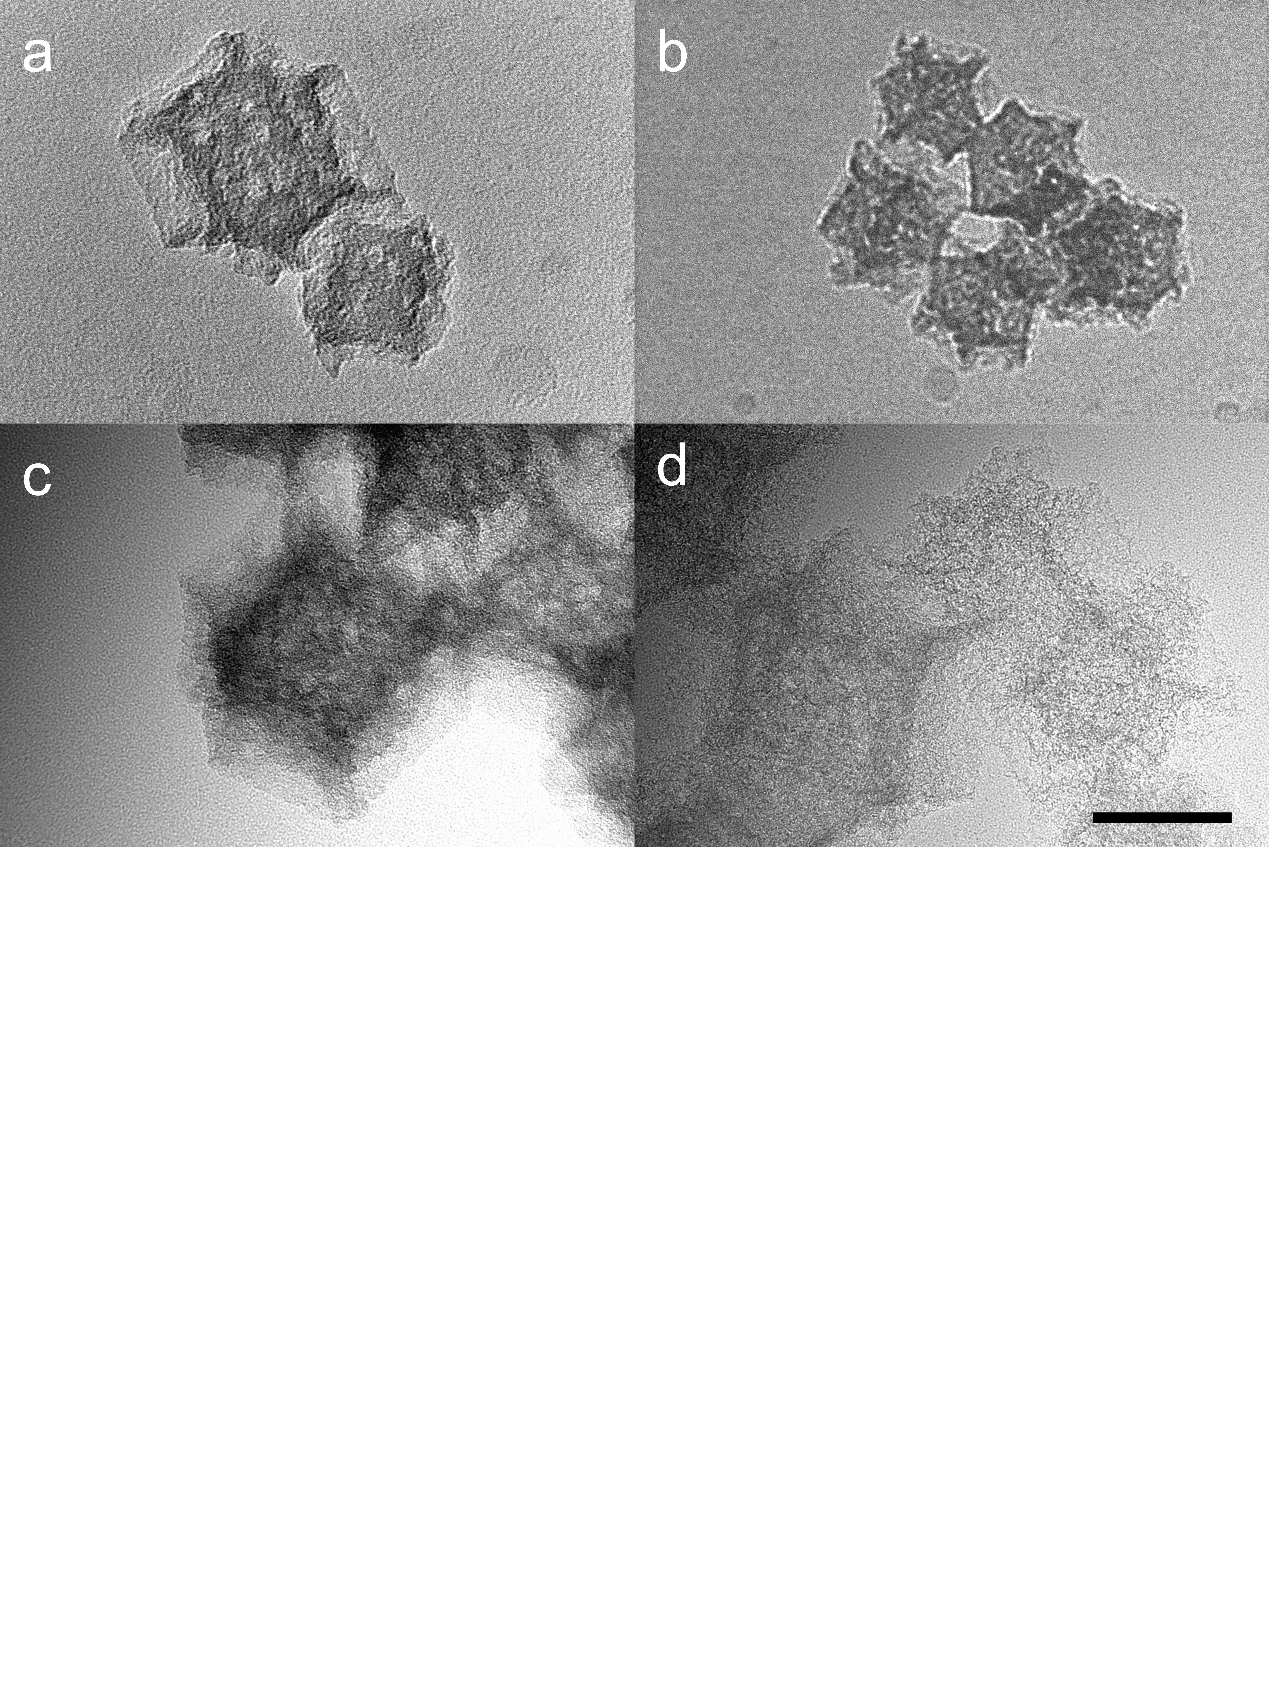


**Supplementary Fig. 9**. Transmission electron microscopy (TEM) images of (a) tZIF-Cu800, (b) tZIF-Cu900, (c) tZIF-Cu1000 and (d) tZIF-Cu1100. The scale bar is 50 nm.


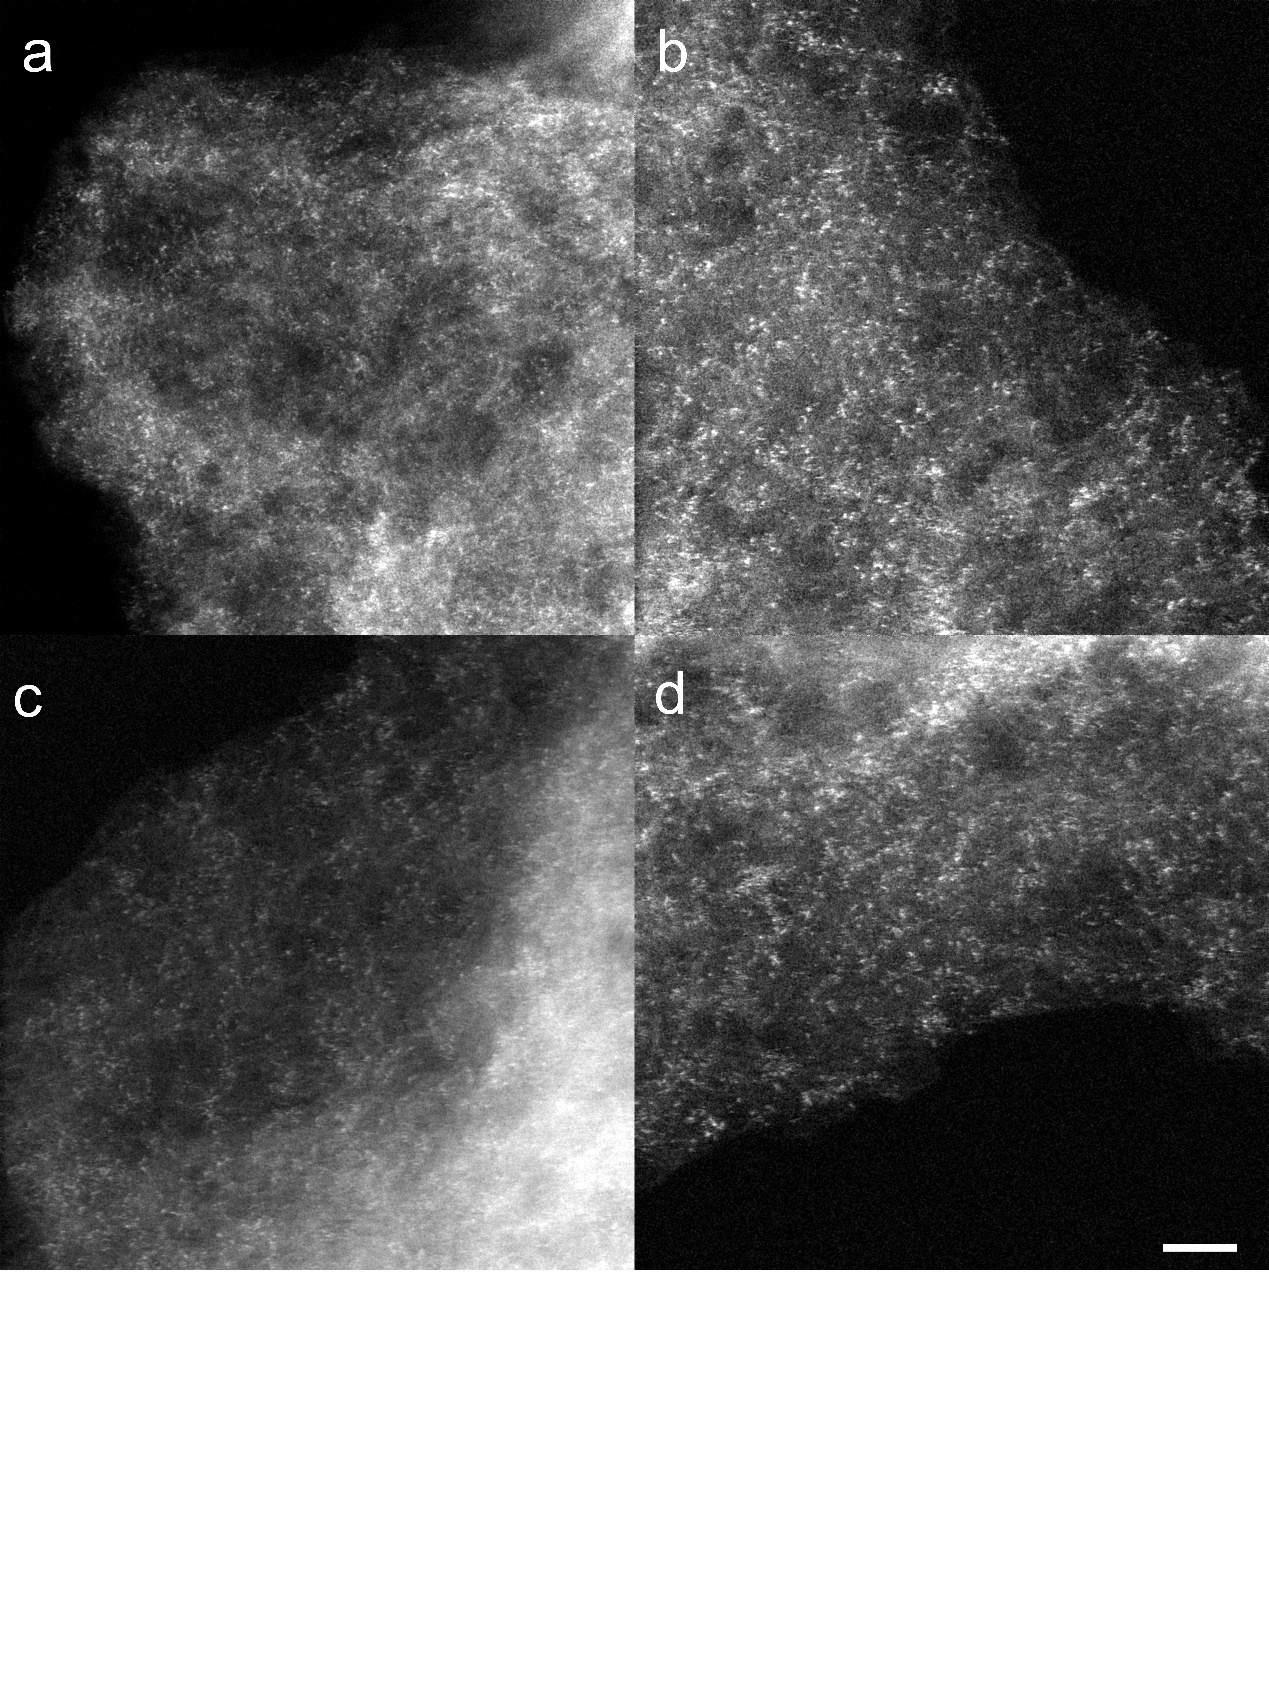


**Supplementary Fig. 10**. Aberration-corrected high-angle annular dark-field scanning transmission electron microscopy (AC HAADF-STEM) images of (a) tZIF-Cu800, (b) tZIF-Cu900, (c) tZIF-Cu1000 and (d) tZIF-Cu1100, showing the atomic dispersion of Cu species. The scale bar is 2 nm.


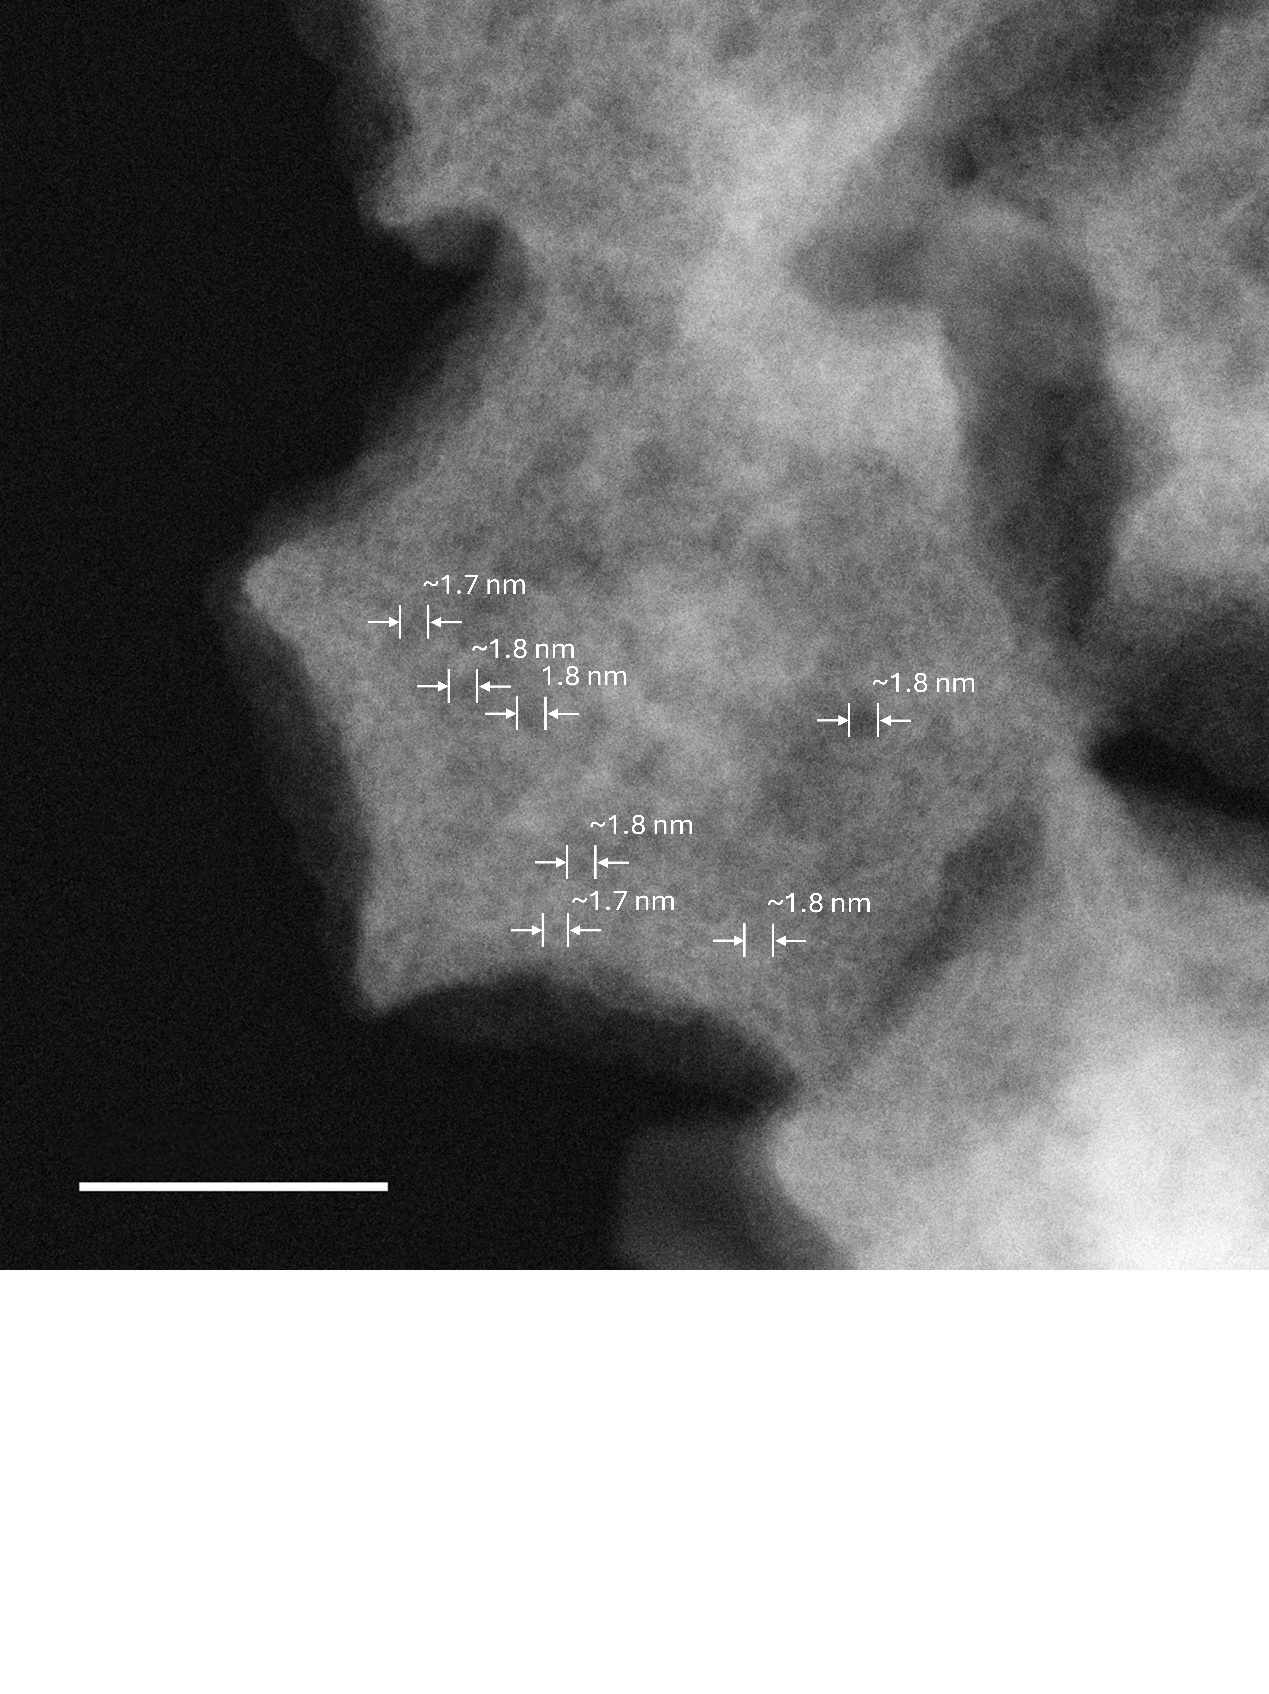


**Supplementary Fig. 11**. Scanning transmission electron microscopy (STEM) image of tZIF-Cu900, showing the nanoconfined cavities with a dominant size of 1.7–1.8 nm. The scale bar is 50 nm.


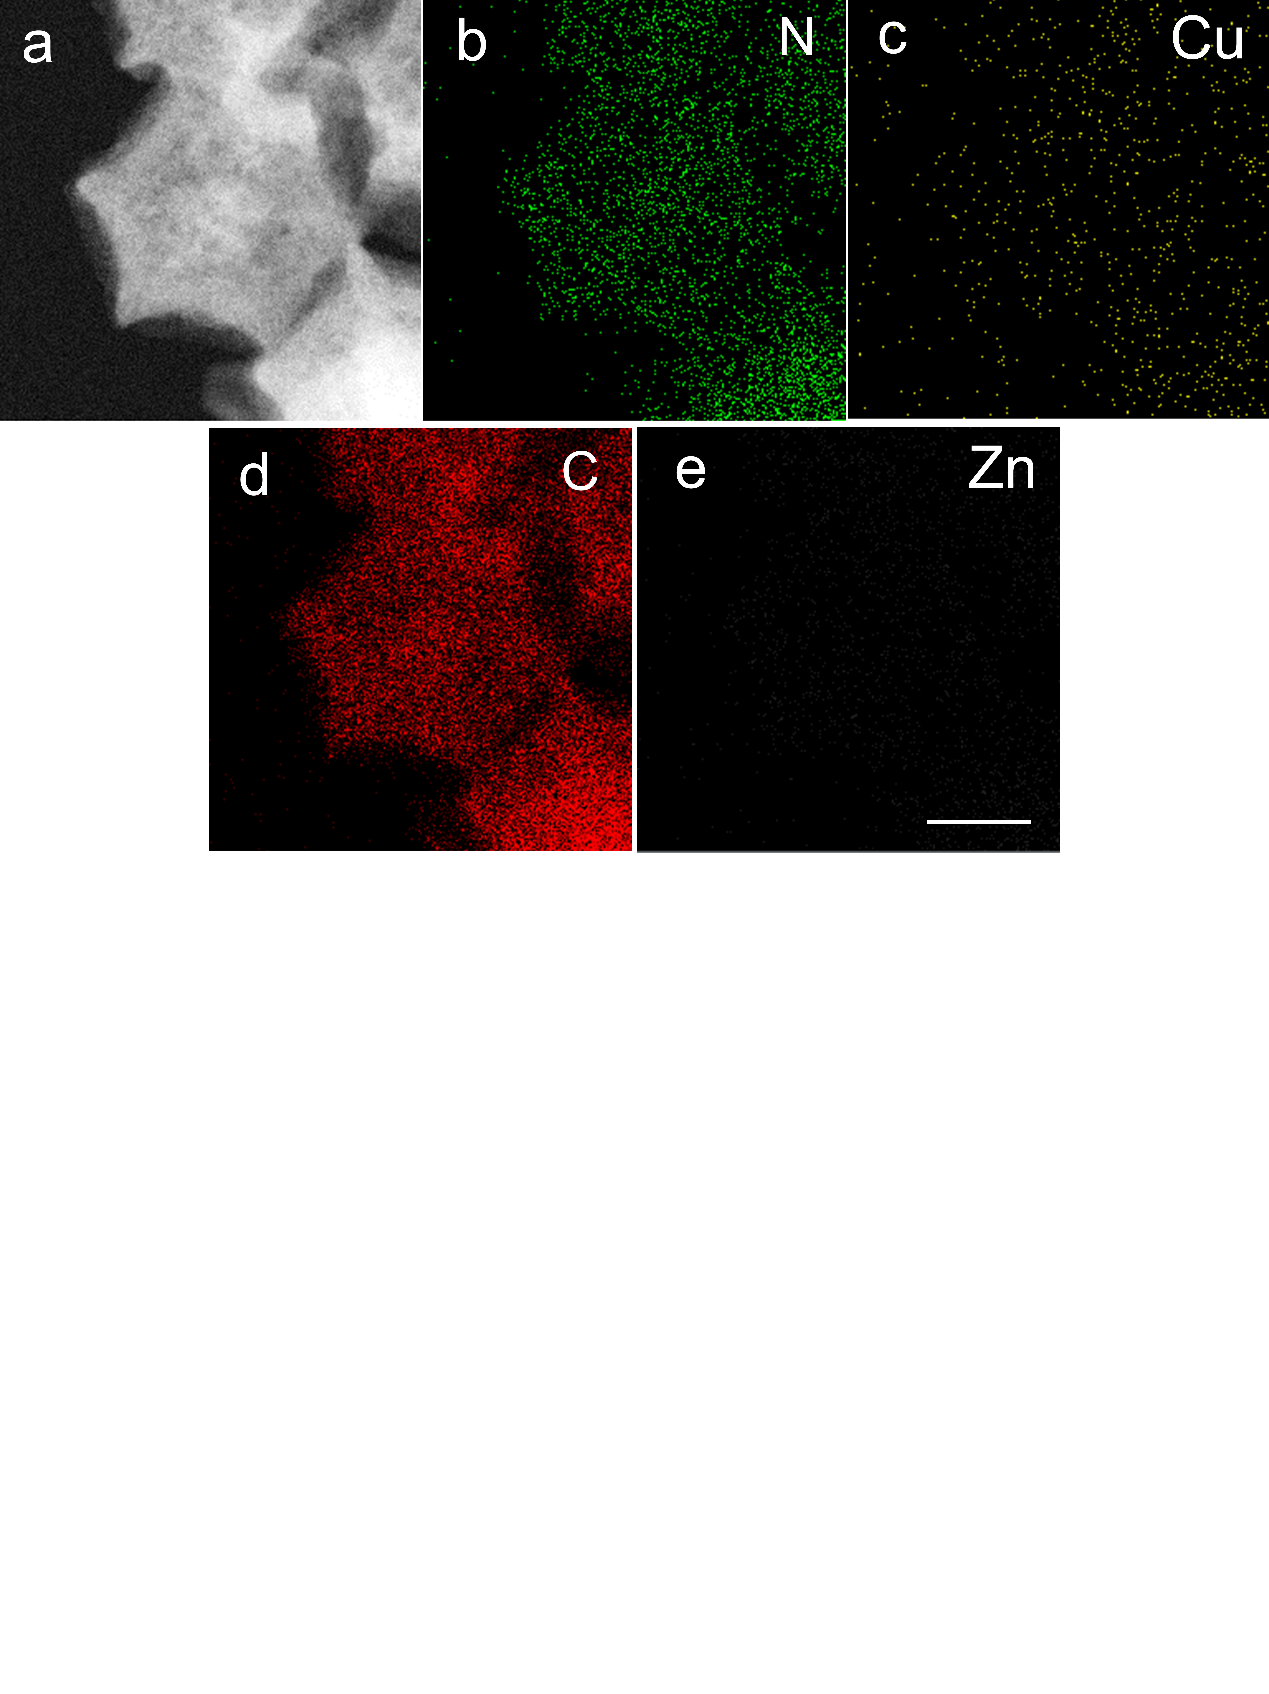


**Supplementary Fig. 12**. Energy dispersive X-ray spectroscopy (EDS) elemental mapping of tZIF-Cu900: (a) STEM bright-field image, and corresponding elemental maps of (b) N, (c) Cu, (d) C, (e) Zn. Scale bar is 50 nm.

EDS elemental mapping (Supplementary Fig. 12) showed dominant uniform C, significant homogeneous N, atomically dispersed trace Cu, and nearly undetectable Zn. The weight ratios of both Cu and Zn were below 1 wt.%.

Furthermore, the actual Cu and Zn contents of all tZIF-Cu samples were quantified by ICP-OES. The residual Zn content in all pyrolyzed samples is below 0.03 wt%, and the Cu content in tZIF-Cu800, tZIF-Cu900, tZIF-Cu1000, and tZIF-Cu1100 is 0.23 wt%, 0.22 wt%, 0.22 wt%, and 0.21 wt%, respectively, consistent with EDS results.


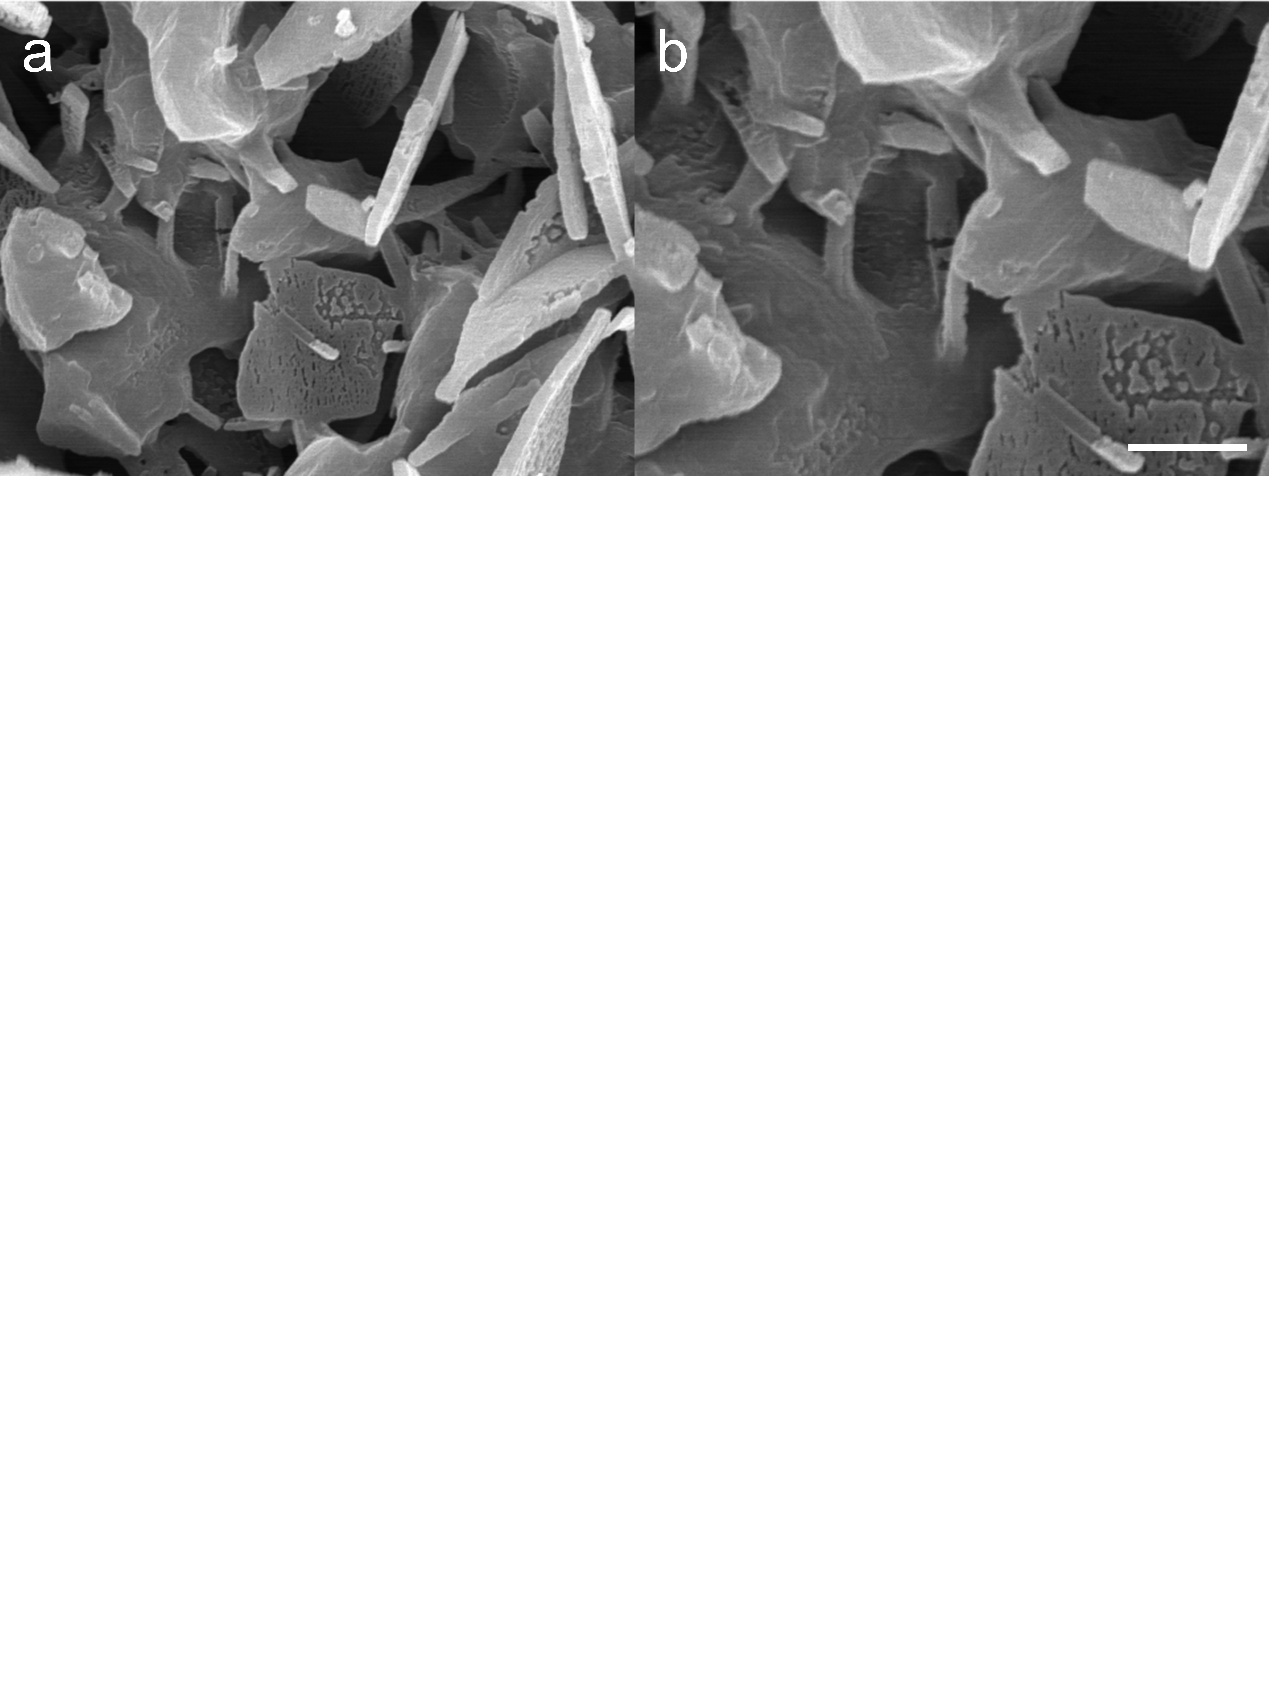


**Supplementary Fig. 13**. Scanning electron microscopy (SEM) images of tZIF900 (undoped ZIF) annealed at 900 °C. The scale bar is 500 nm.


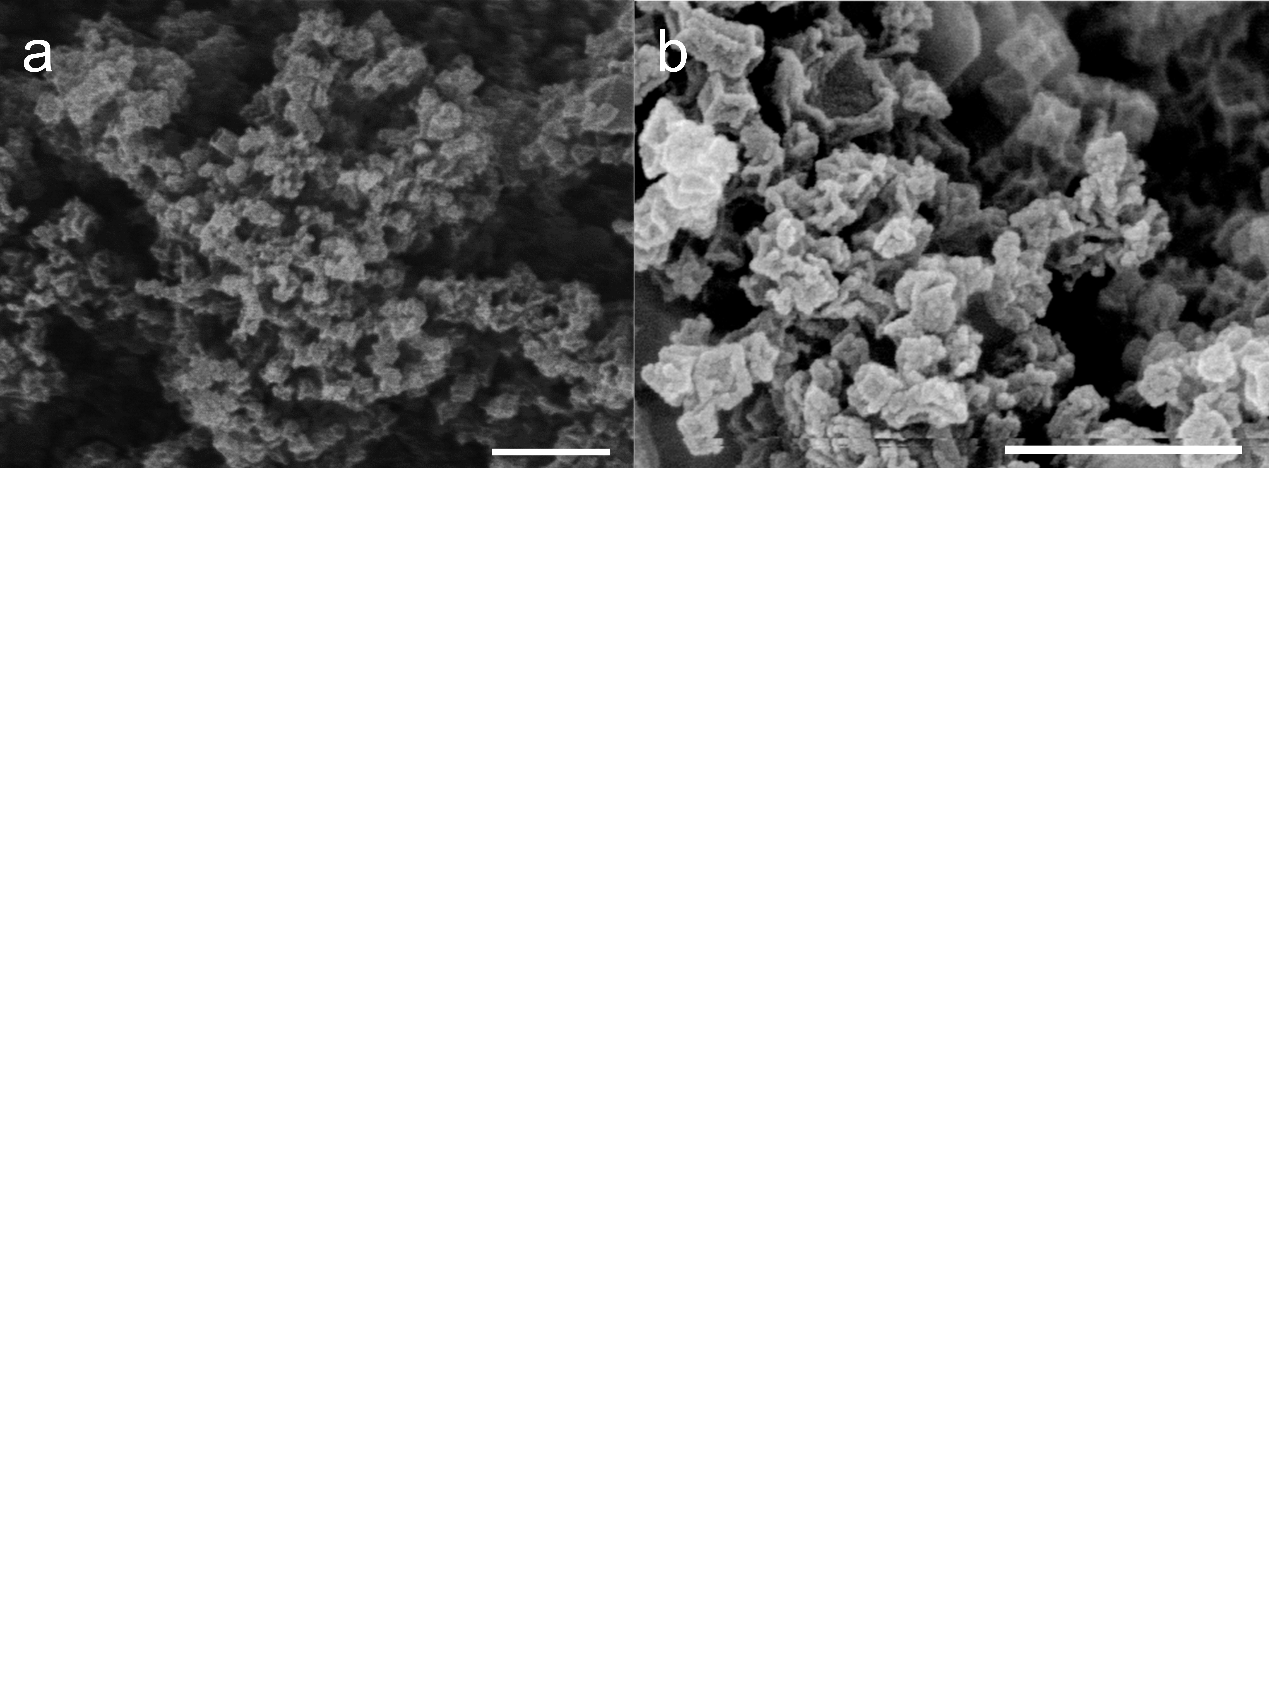


**Supplementary Fig. 14**. Scanning electron microscopy (SEM) images of control sample tZIF-Co900 synthesized via the same thermal sculpting protocol as tZIF-Cu900. All scale bars are 250 nm.


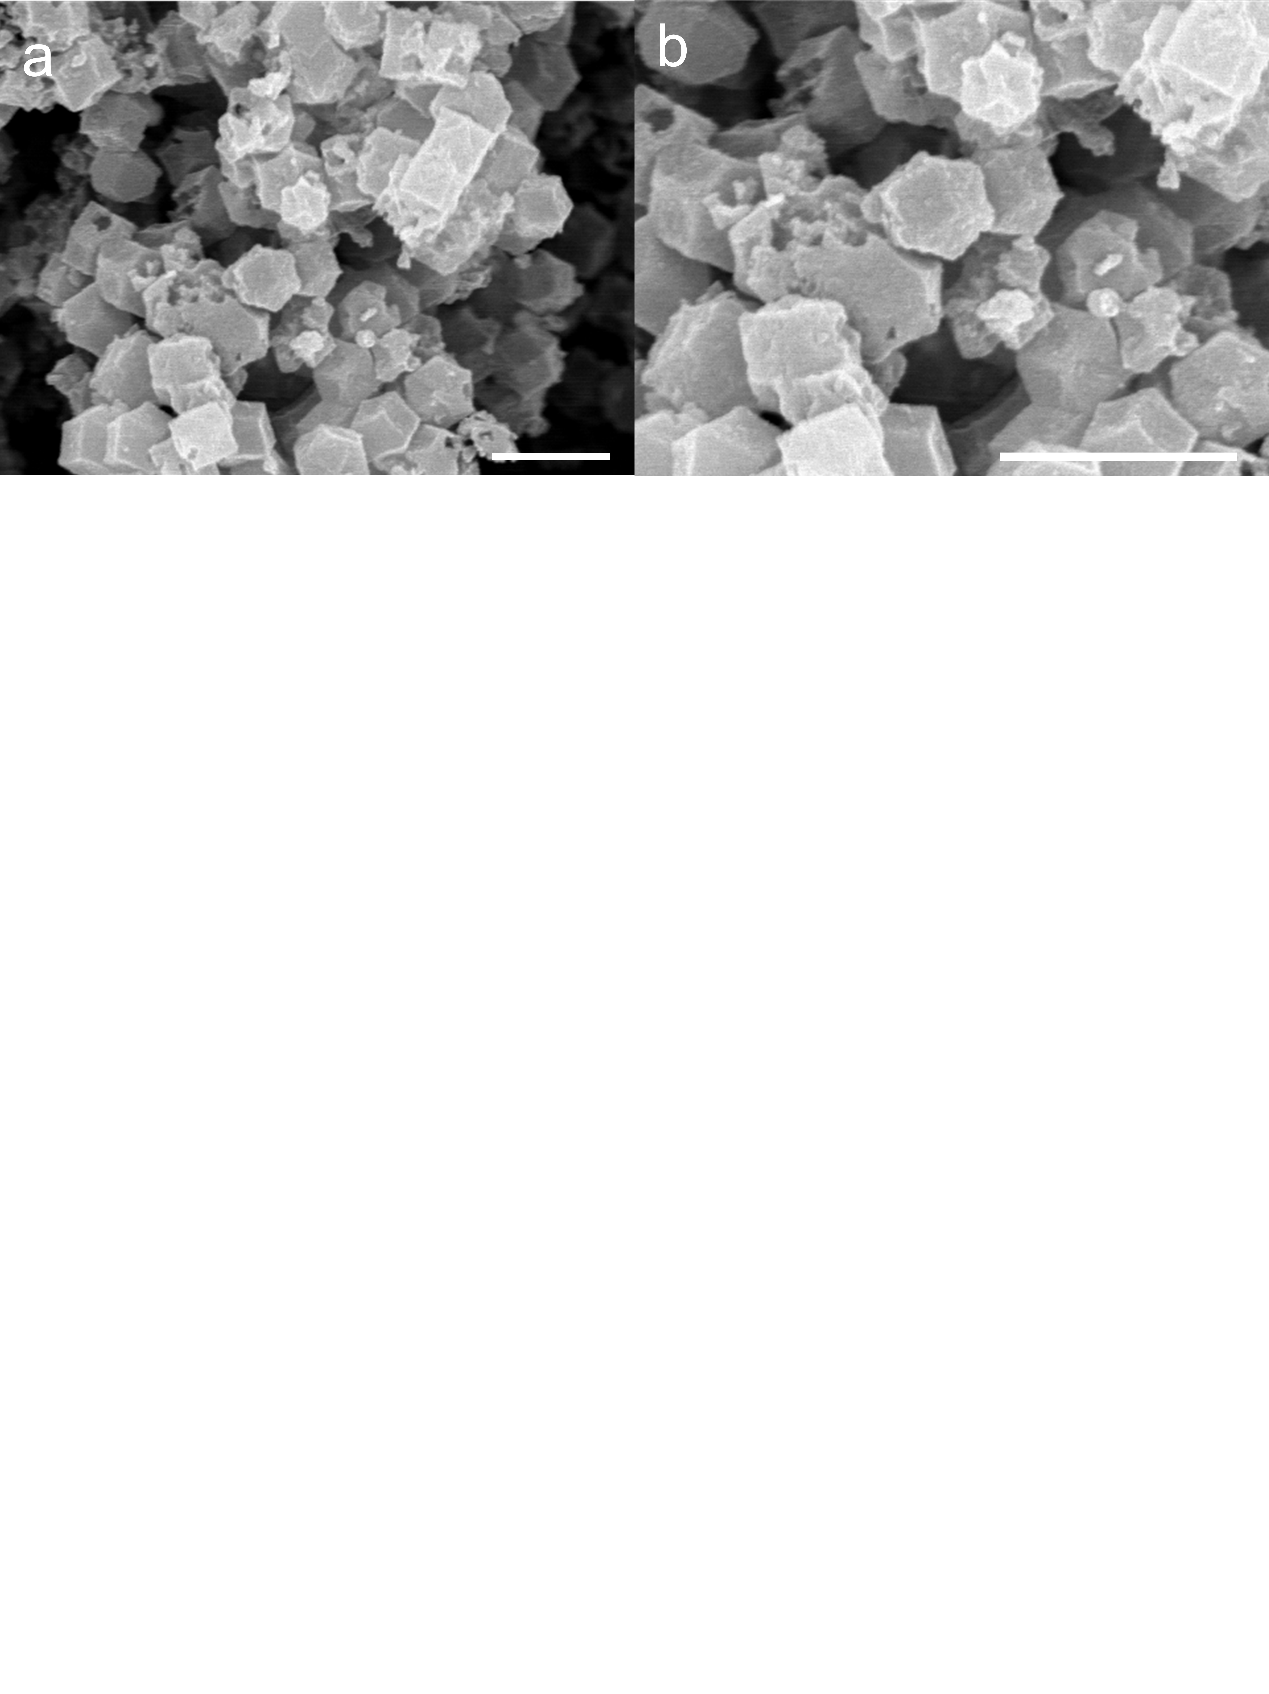


**Supplementary Fig. 15**. Scanning electron microscopy (SEM) images of control sample tZIF-Fe900 synthesized via the same thermal sculpting protocol as tZIF-Cu900. All scale bars are 250 nm.


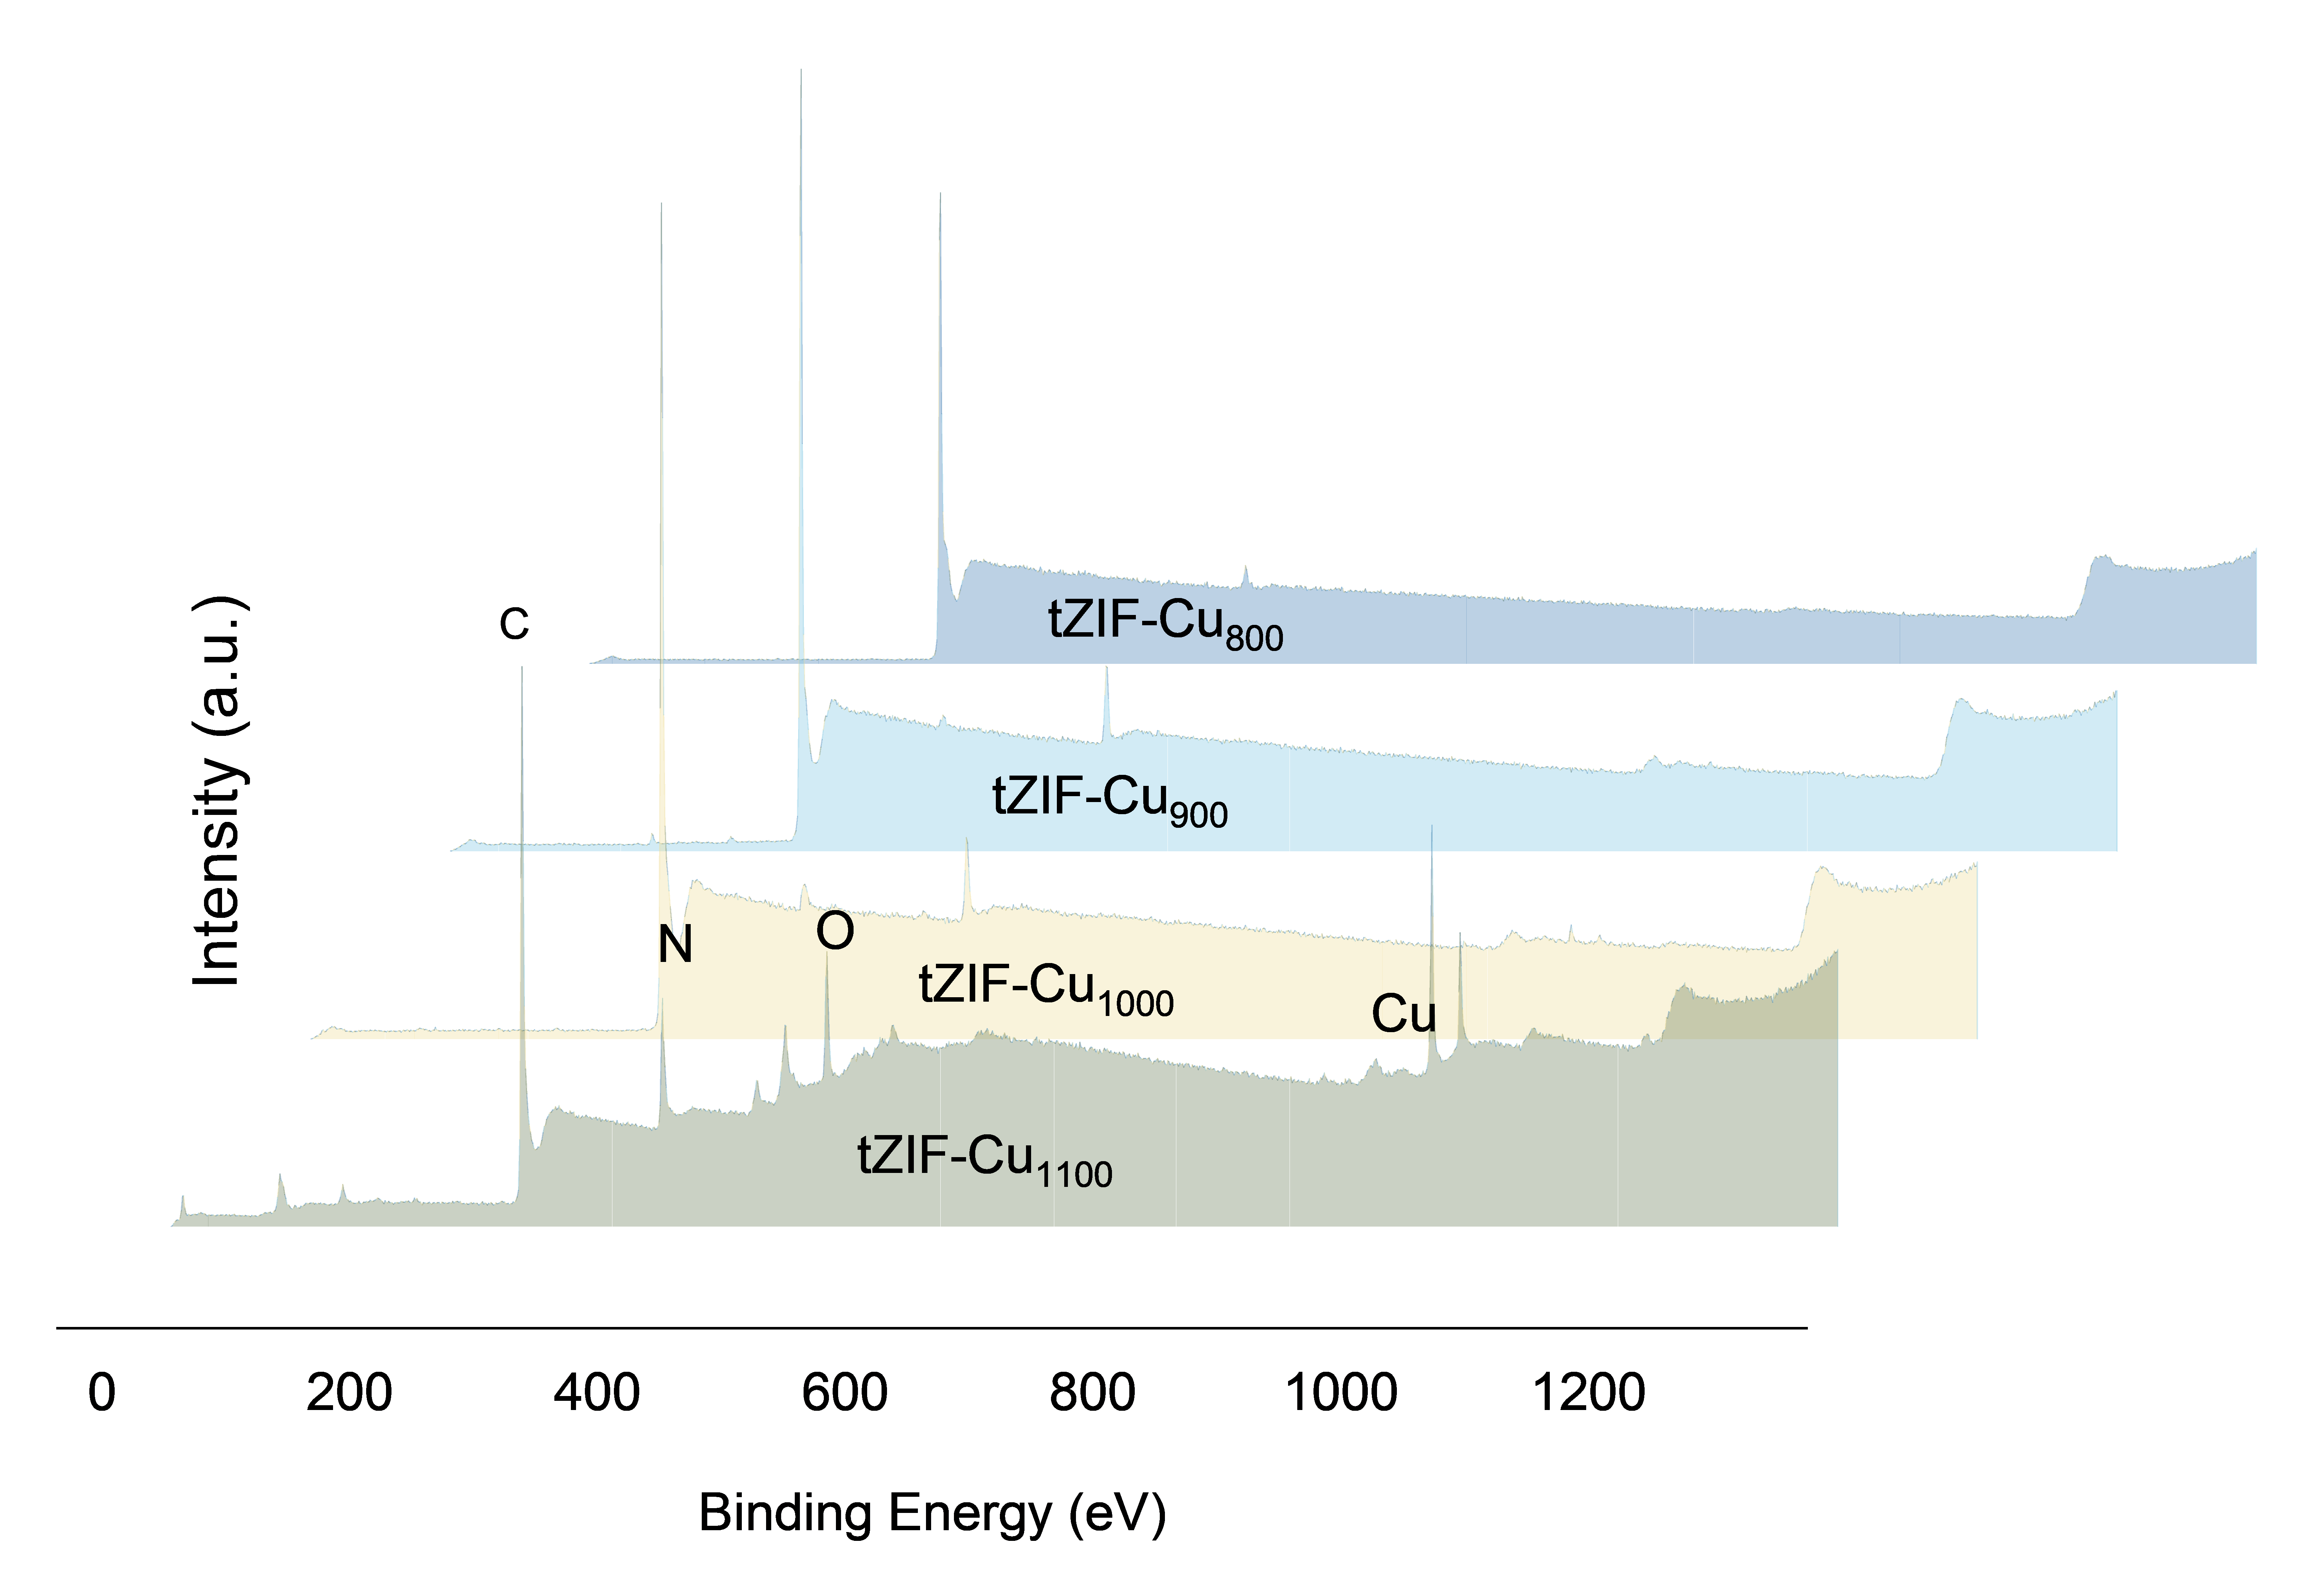


**Supplementary Fig. 16**. X-ray photoelectron spectroscopy (XPS) survey spectra of tZIF-Cu800, tZIF-Cu900, tZIF-Cu1000 and tZIF-Cu1100 (monochromatic Al Kα radiation, 1486.6 eV).


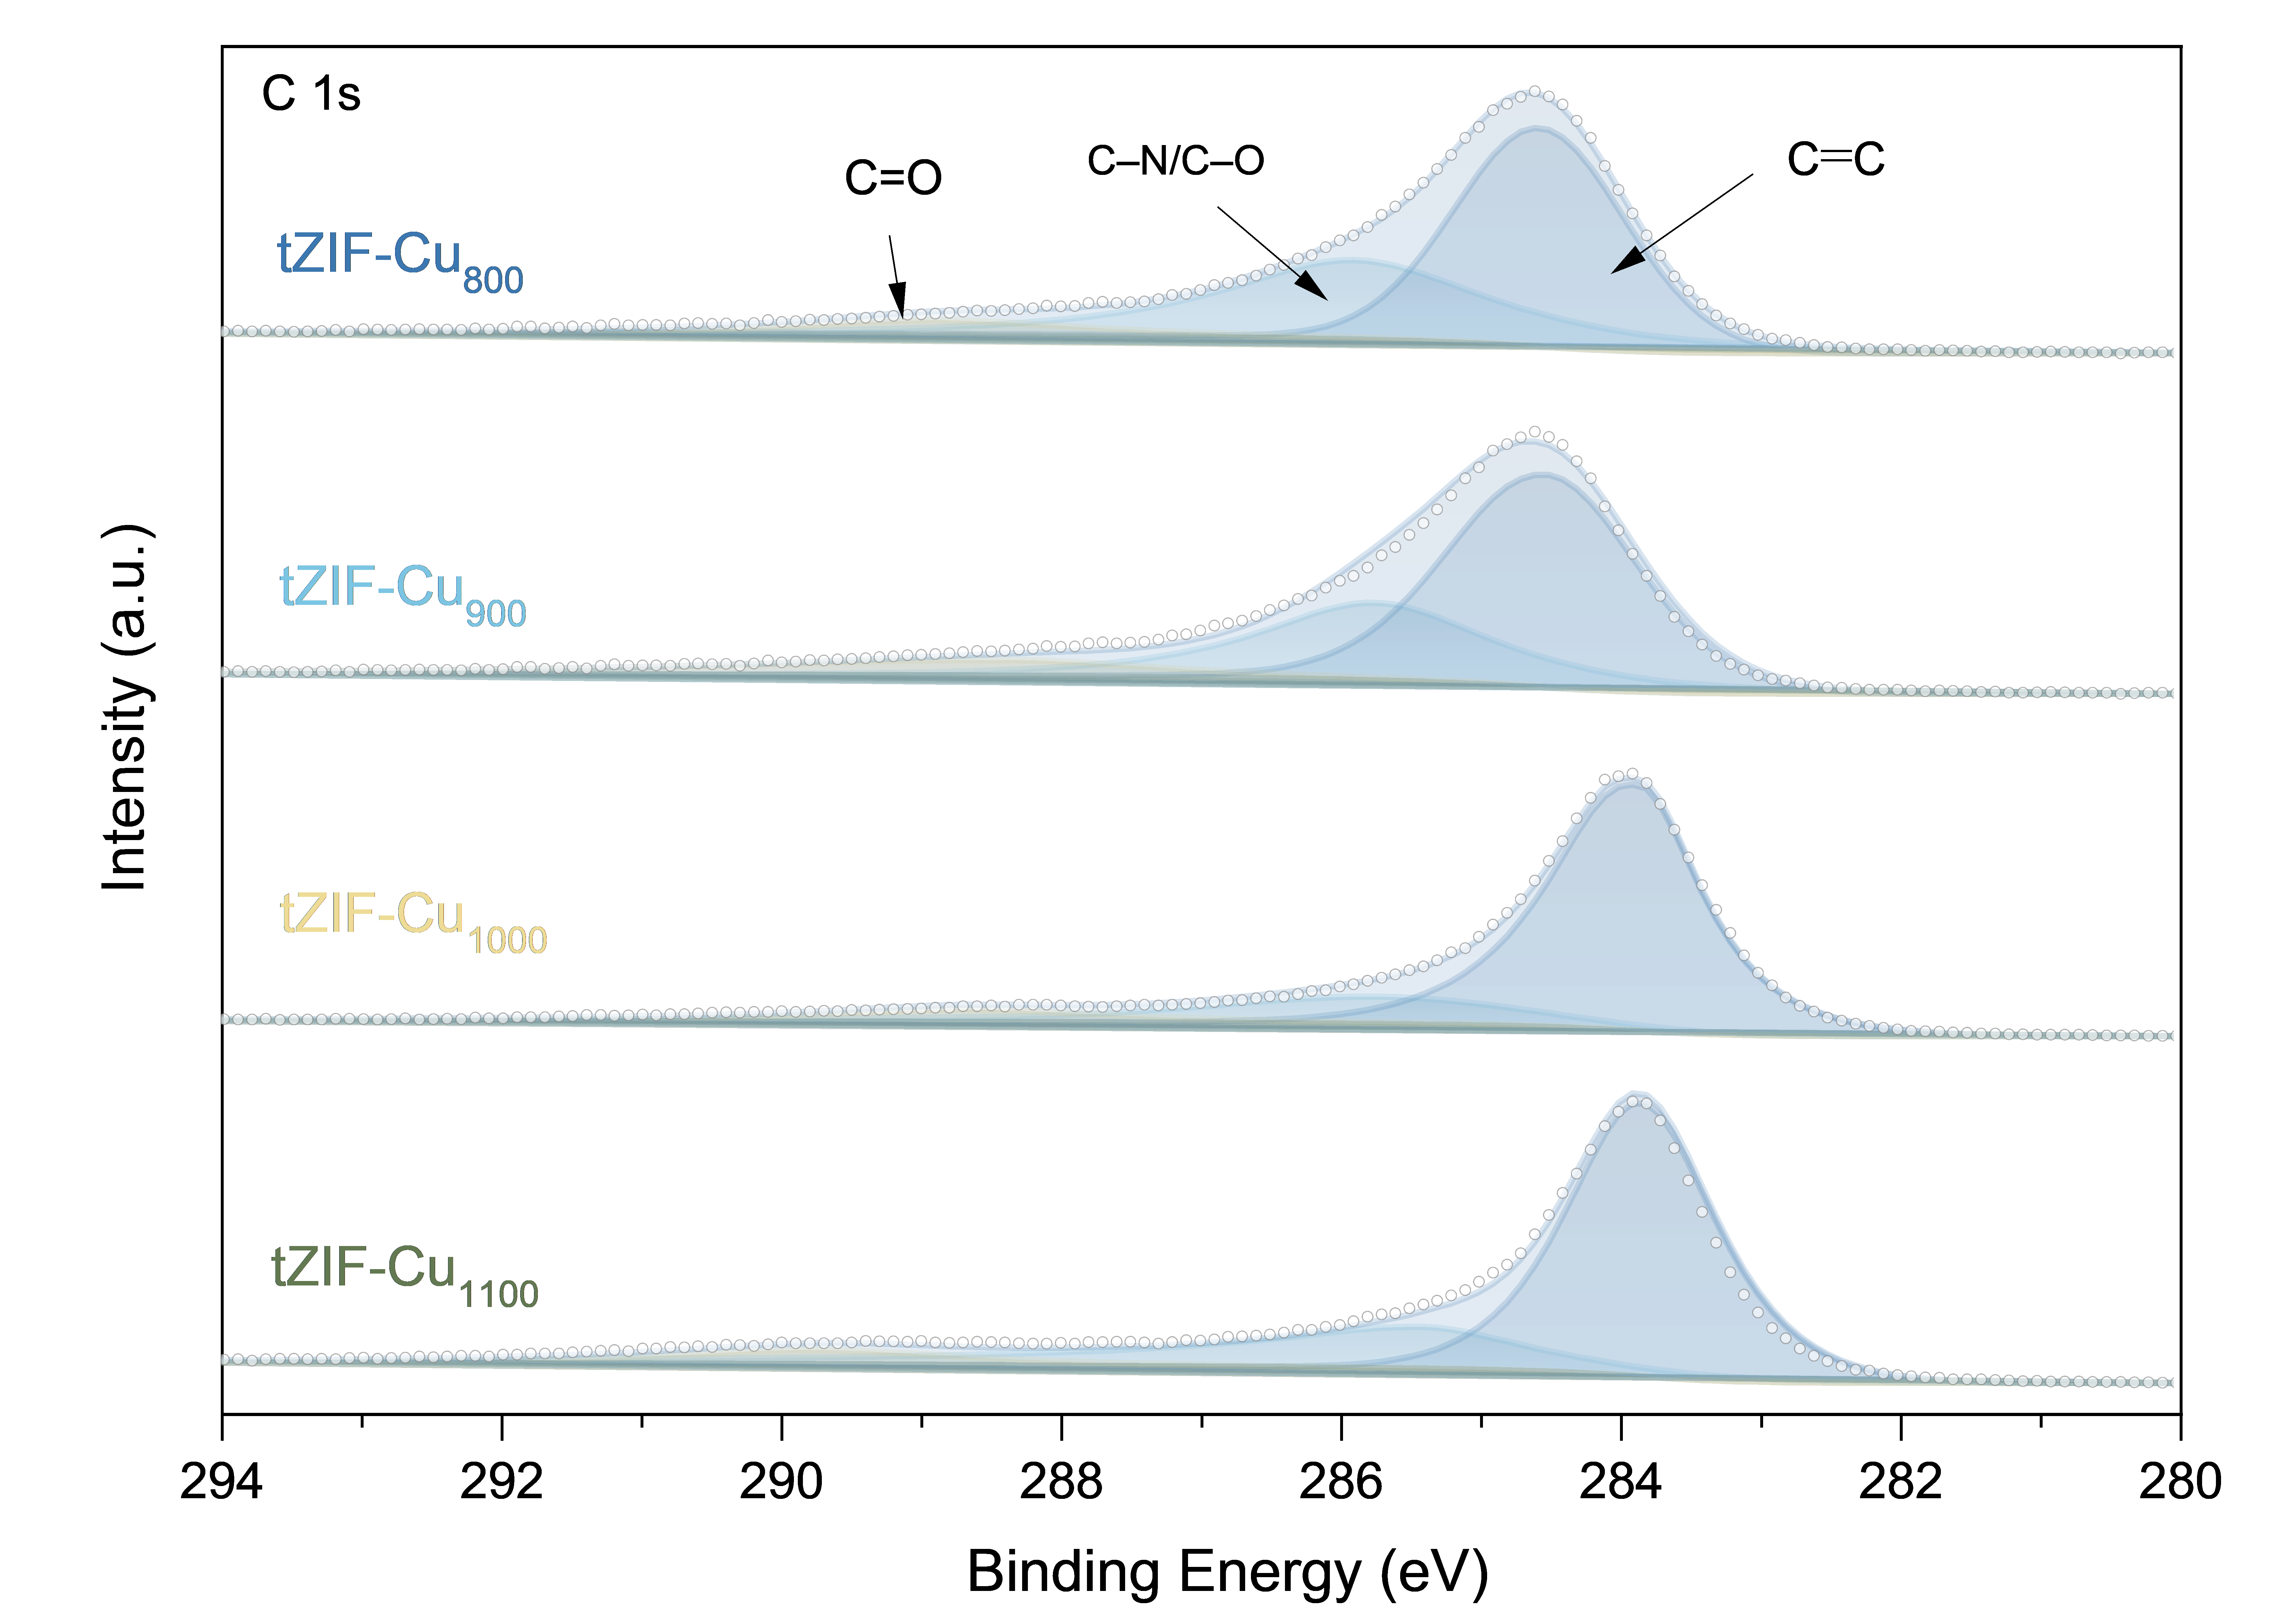


**Supplementary Fig. 17**. High-resolution O 1s X-ray photoelectron spectroscopy (XPS) spectra of tZIF-Cu800, tZIF-Cu900, tZIF-Cu1000 and tZIF-Cu1100. All binding energies were calibrated by the adventitious C 1s peak at 284.8 eV.


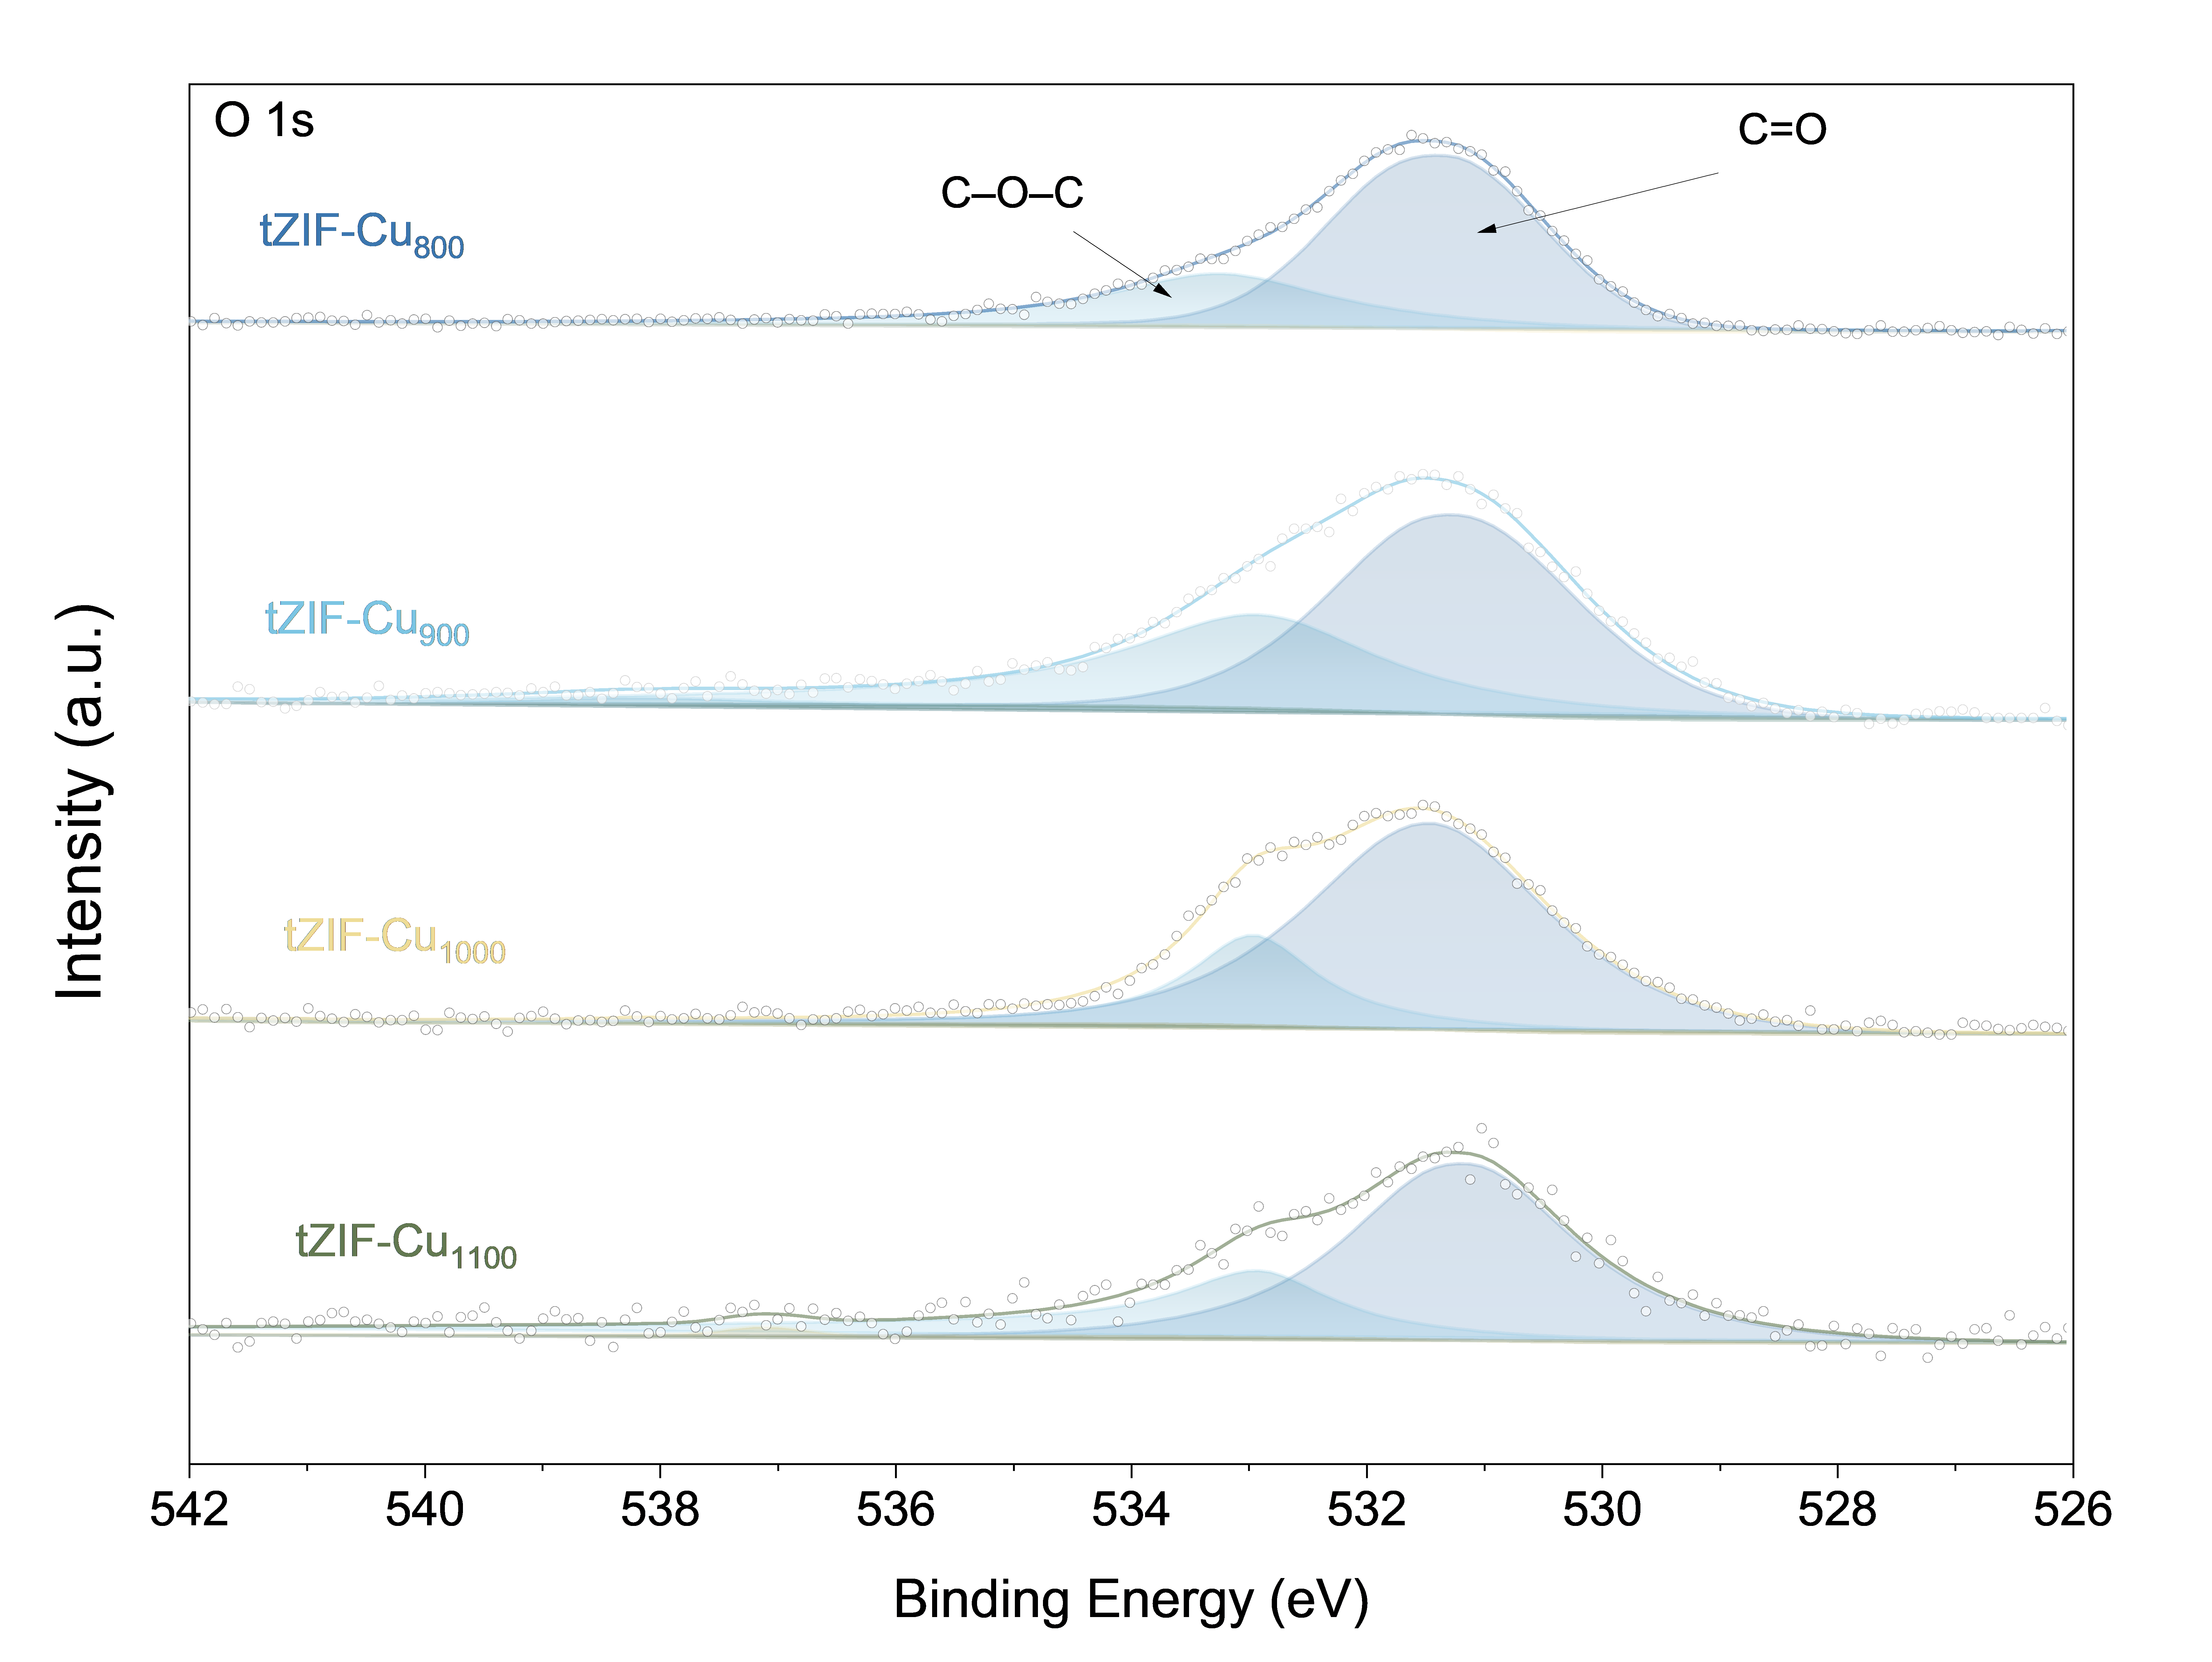


**Supplementary Fig. 18**. High-resolution C 1s X-ray photoelectron spectroscopy (XPS) spectra of tZIF-Cu800, tZIF-Cu900, tZIF-Cu1000 and tZIF-Cu1100. All binding energies were calibrated by the adventitious C 1s peak at 284.8 eV.

XPS was performed to characterize the surface chemical composition and coordination environment of tZIF-Cu samples. N 1s spectra are deconvoluted into 3 characteristic peaks assigned to pyridinic N, pyrrolic N, and graphitic N. Pyridinic N11, the dominant species for anchoring Cu single atoms, accounts for 8.7 at% in tZIF-Cu900, higher than that in tZIF-Cu800 (7.2 at%), tZIF-Cu1000 (6.8 at%), and tZIF-Cu1100 (5.1 at%). Cu 2p spectra of all samples show two main peaks at ~932.4 eV (Cu 2p3/2) and ~952.2 eV (Cu 2p1/2)12,13, accompanied by weak satellite peaks, indicating the dominant presence of Cu⁺ species. The Cu 2p3/2 binding energy shifts slightly to higher values from tZIF-Cu800 to tZIF-Cu1100, indicating a gradual increase in the oxidation state of Cu species with rising pyrolysis temperature. The satellite peak intensity decreases with increasing temperature, confirming the absence of Cu2+ aggregates and the dominant presence of Cu+ species in all samples. For the O 1s spectra, deconvoluted peaks at 531.2 eV (C=O) and 533.6 eV (C–O–C) are identified14, with the total oxygen content decreasing from 8.2 at% (tZIF-Cu800) to 3.1 at% (tZIF-Cu1100), consistent with the removal of oxygen-containing functional groups during high-temperature pyrolysis. For the C 1s spectra, the deconvoluted peaks at 284.5 eV (sp2 C=C) and ~285.6 eV (C–N/C–O) are observed for all samples15. With increasing pyrolysis temperature, the proportion of sp2 C=C increases from 62.3 at% (tZIF-Cu800) to 81.5 at% (tZIF-Cu1100), accompanied by a 0.7 eV downshift to 283.8 eV of the C=C peak, confirming the enhanced graphitization of the carbon matrix at elevated temperatures16.


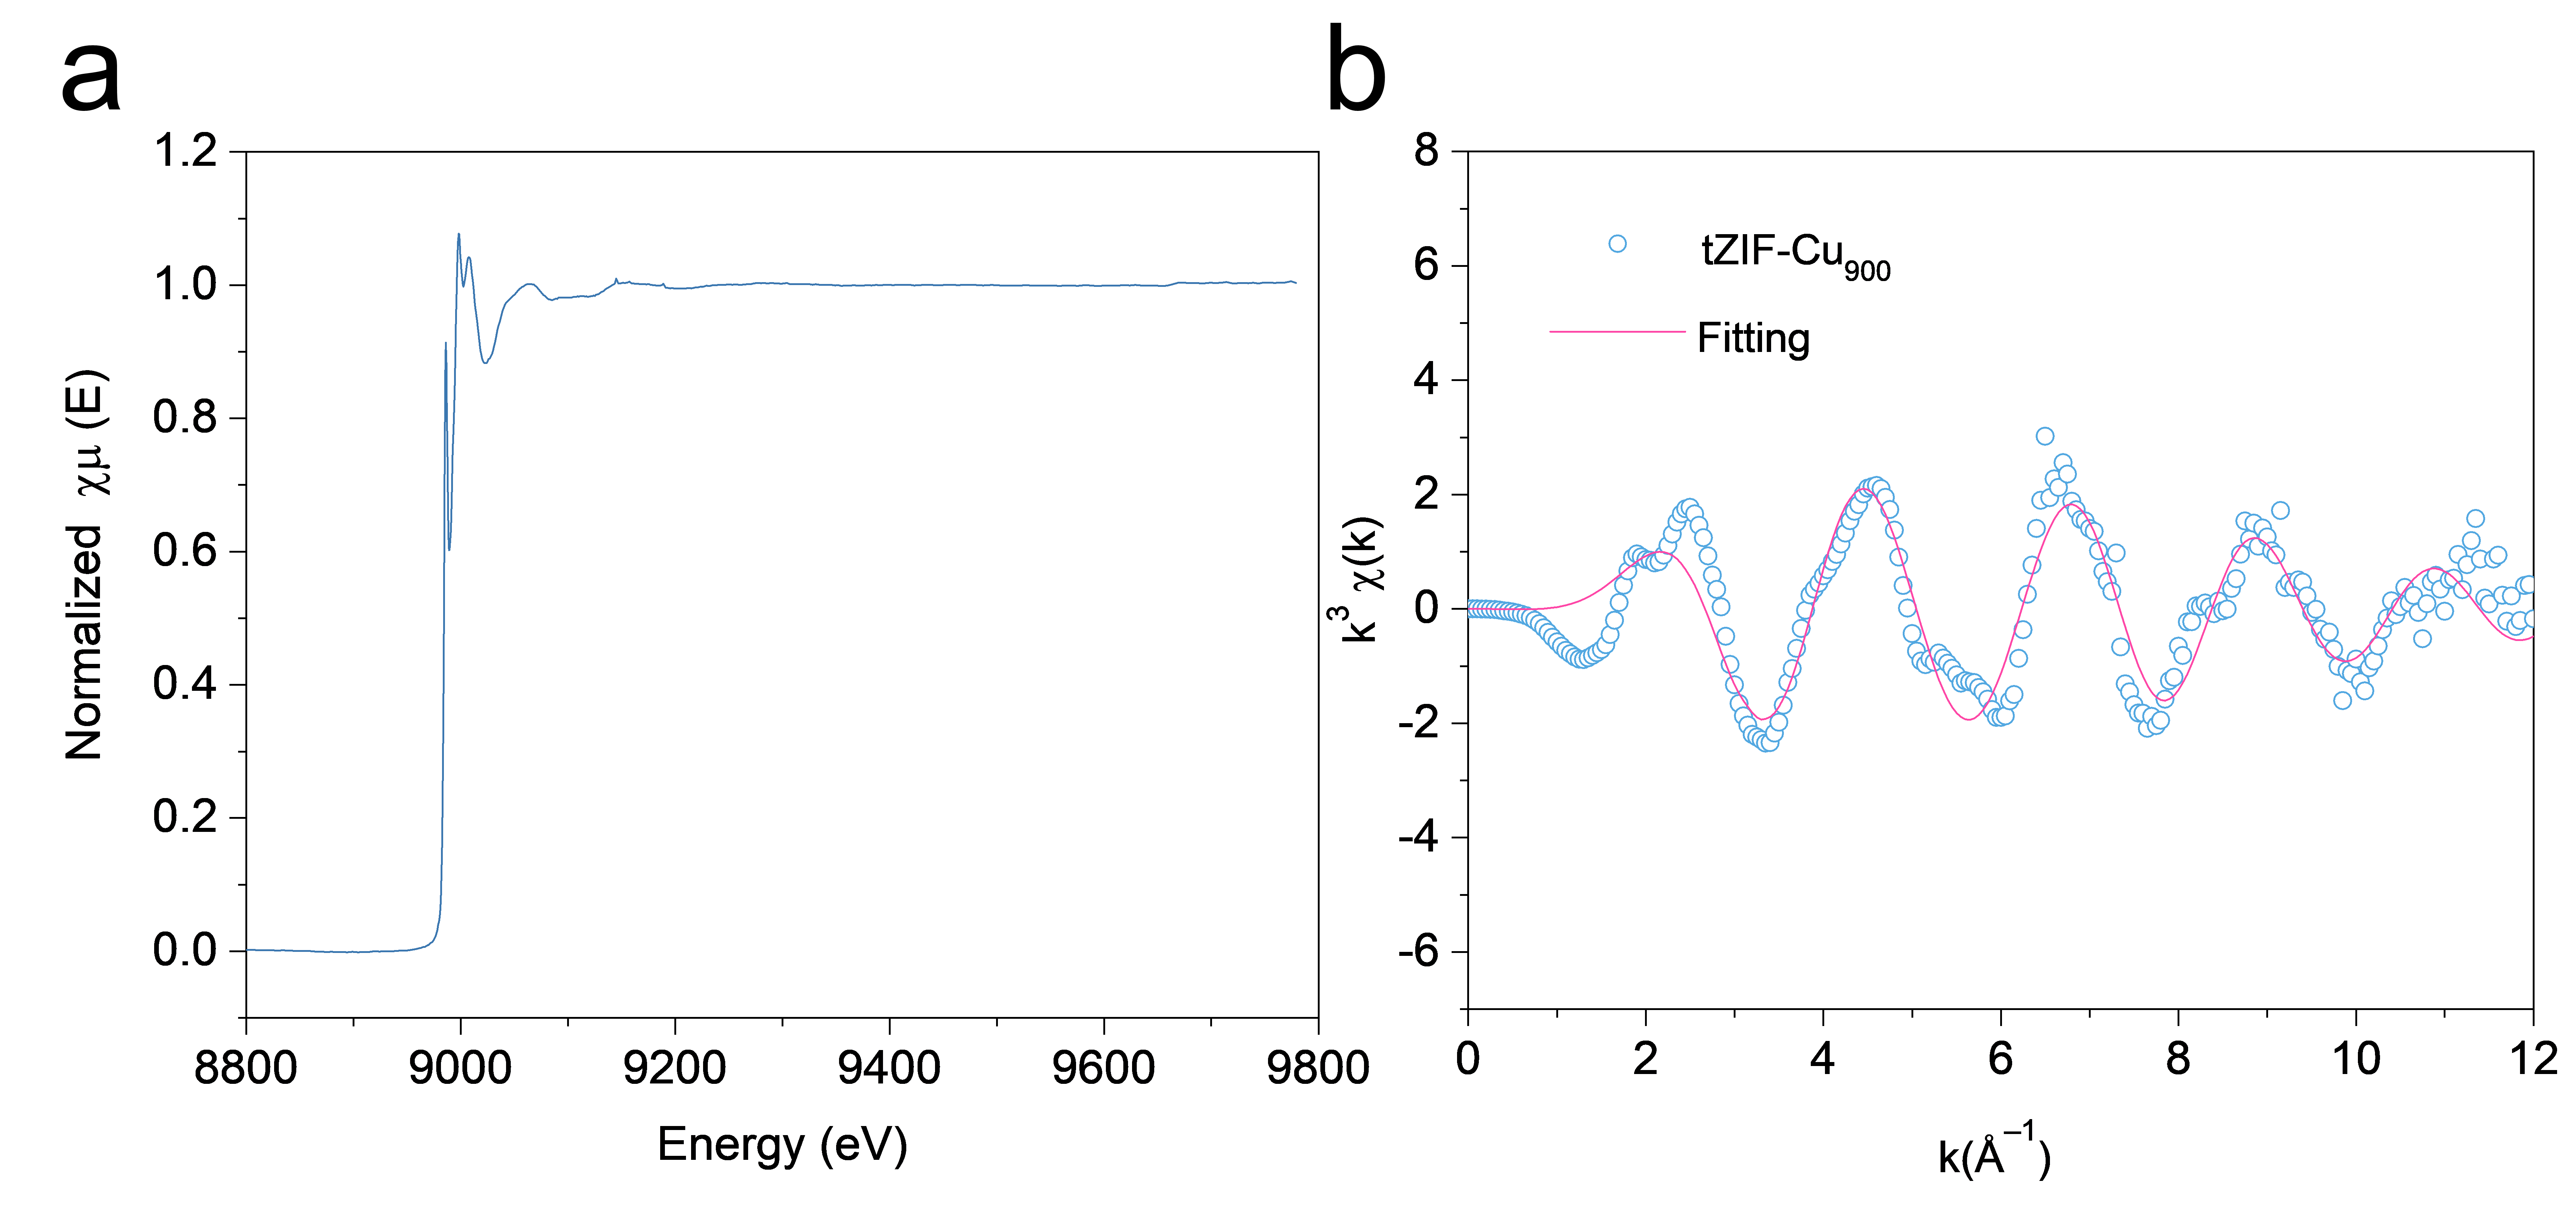


**Supplementary Fig. 19**. Cu K-edge extended X-ray absorption fine structure (EXAFS) analysis of tZIF-Cu900: (a) k2-weighted EXAFS oscillation in k space, (b) fitting curve of Fourier-transformed EXAFS in R space. The spectra were collected in fluorescence mode at the Beamline 8-ID of NSLS-II, Brookhaven National Laboratory.

XANES and EXAFS spectroscopy were performed to uncover the electronic structure and local coordination environment of Cu species in tZIF-Cu900 (Fig. 2c, d, Supplementary Fig. 19). For the Cu K-edge XANES spectra, the near-edge absorption threshold of tZIF-Cu900 is located at 8986 eV, between the absorption edges of Cu foil (8979 eV) and CuO (8988 eV), and close to that of Cu2O (8984 eV), directly confirming that the Cu species in tZIF-Cu900 are predominantly in the +1 valence state17,18, consistent with XPS results. Fourier transform (FT) of the k²-weighted EXAFS spectra reveals a single dominant scattering peak at ~1.5 Å, corresponding to the first-shell Cu–N coordination. No characteristic Cu-Cu scattering peak at ~2.2 Å or Cu-O scattering peak at ~1.8 Å is observed. Wavelet transform (WT) of the EXAFS spectra verifies that only one intensity maximum at k = 7 Å–1, R = 1.5 Å is observed for tZIF-Cu900, corresponding to Cu–N coordination, with no intensity maxima associated with Cu-Cu metallic bonding. The fitting results show that the first coordination shell of Cu is dominated by Cu–N bonds, with a coordination number of 3.5 ± 0.43 and an average bond length of 1.87 ± 0.01 Å, consistent with the theoretical Cu–N4 coordination structure. The Debye-Waller factor (σ2) of 6.92 ± 2.19 × 10–3 Å2 indicates the high structural rigidity of the Cu–N4 moiety, which is critical for maintaining the stability of the active sites during electrocatalysis.

**Section 3. Electrocatalytic performance and characterization**

**Section 3.1. Electrochemical test**

**Linear sweep voltammetry (LSV)**: LSV was performed on a CHI 660E electrochemical workstation with a standard three-electrode system, at a scan rate of 5 mV s–1 with 85% iR-drop compensation. All potentials were converted to the reversible hydrogen electrode (RHE) scale via the Nernst equation:

Tests were conducted in targeted electrolyte systems to characterize different catalytic behaviors: (1) NO3RR: Ar saturated 0.1 M K2SO4 + 0.1 M KNO3, scan range 0.2 V to –0.6 V vs. RHE; (2) HER: 1.0 M H2SO4, scan range 0.2 V to –0.6 V vs. RHE; (3) CO2RR: CO2 saturated 0.1 M KHCO3, scan range 0.2 V to –0.6 V vs. RHE; (4) pH optimization: NO3RR activity was compared in alkaline (0.1 M KOH + 0.1 M KNO3) and neutral (0.1 M K2SO₄ + 0.1 M KNO3) electrolytes; (5) C–N coreduction: electrocatalytic response was tested in four electrolytes (Ar saturated 0.1 M KNO3, CO2 saturated 0.1 M KHCO3, Ar saturated 0.1 M KNO3+0.1 M KHCO3, CO2 saturated 0.1 M KNO3+0.1 M KHCO3) with a scan range of 0.2 V to –0.6 V vs. RHE. Inert Ar or CO2 was continuously purged (20 mL min–1) throughout the corresponding tests to maintain the target atmosphere.

**Cyclic voltammetry (CV):** Electrochemical active surface area (*ECSA*) of the catalysts was determined by cyclic voltammetry on a CHI 660E electrochemical workstation. The test was carried out in a three-electrode system, CV curves were collected at different scanning rates (5, 10, 20, 30, 50, 100, and 200 mV s–1) in the non-Faradaic interval (–0.16–0.16 V *vs*. SCE), and the electrochemical active surface area was calculated via the double-layer capacitance (Cdl). The *ECSA* values were obtained by the equation:

where *S* is the actual geometric surface area of the working electrode. The double layer capacitance (*Cdl*) was then determined by plotting the current as a function of scan rate at 0.1 V.

**Electrochemical impedance spectroscopy (EIS):** Interfacial charge transfer kinetics of the catalysts was tested by electrochemical impedance spectroscopy on a CHI 660E electrochemical workstation. The test frequency range was 105 Hz to 10–2 Hz, the AC perturbation amplitude was 5 mV, and the test potential was –0.9 V vs. RHE. The impedance data were fitted with an equivalent circuit using ZView software.


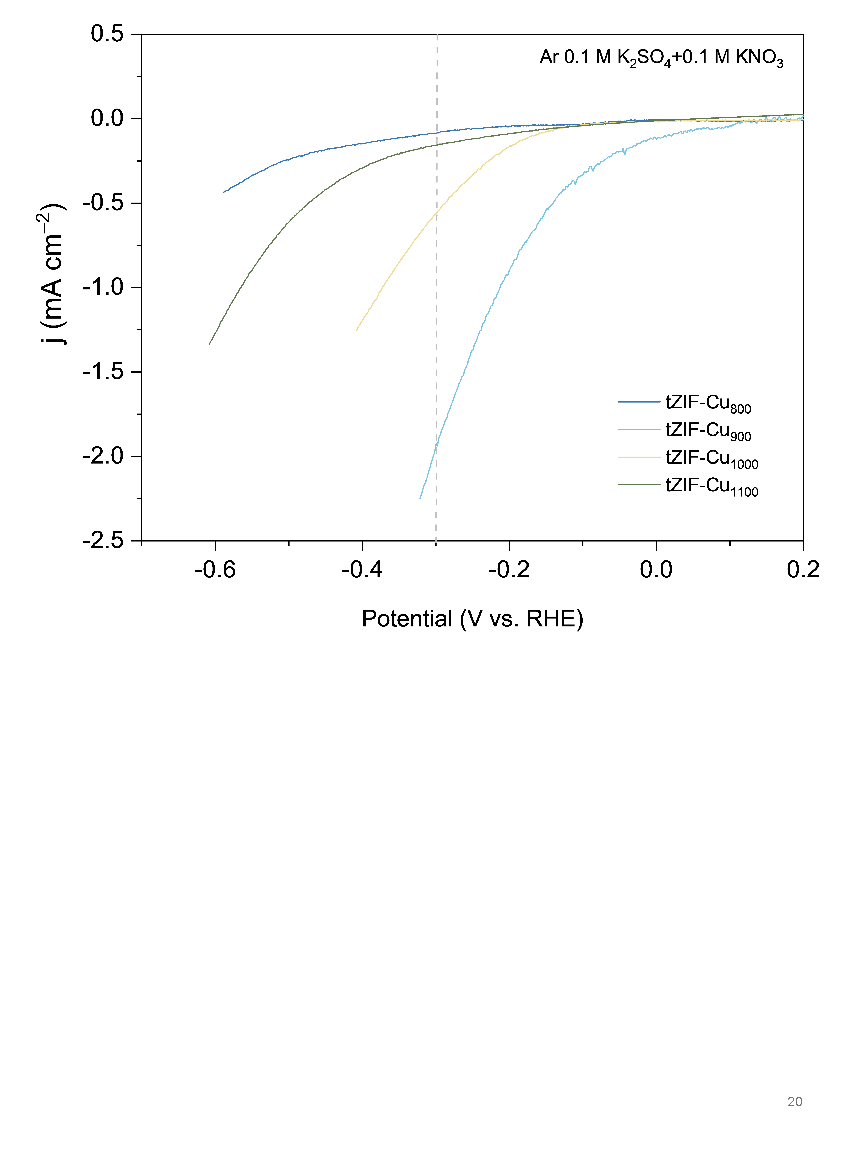


**Supplementary Fig. 20**. Linear sweep voltammetry (LSV) curves for nitrate reduction reaction (NO3RR) of tZIF-Cu series catalysts in Ar-saturated 0.1 M K2SO4 + 0.1 M KNO3 electrolyte.


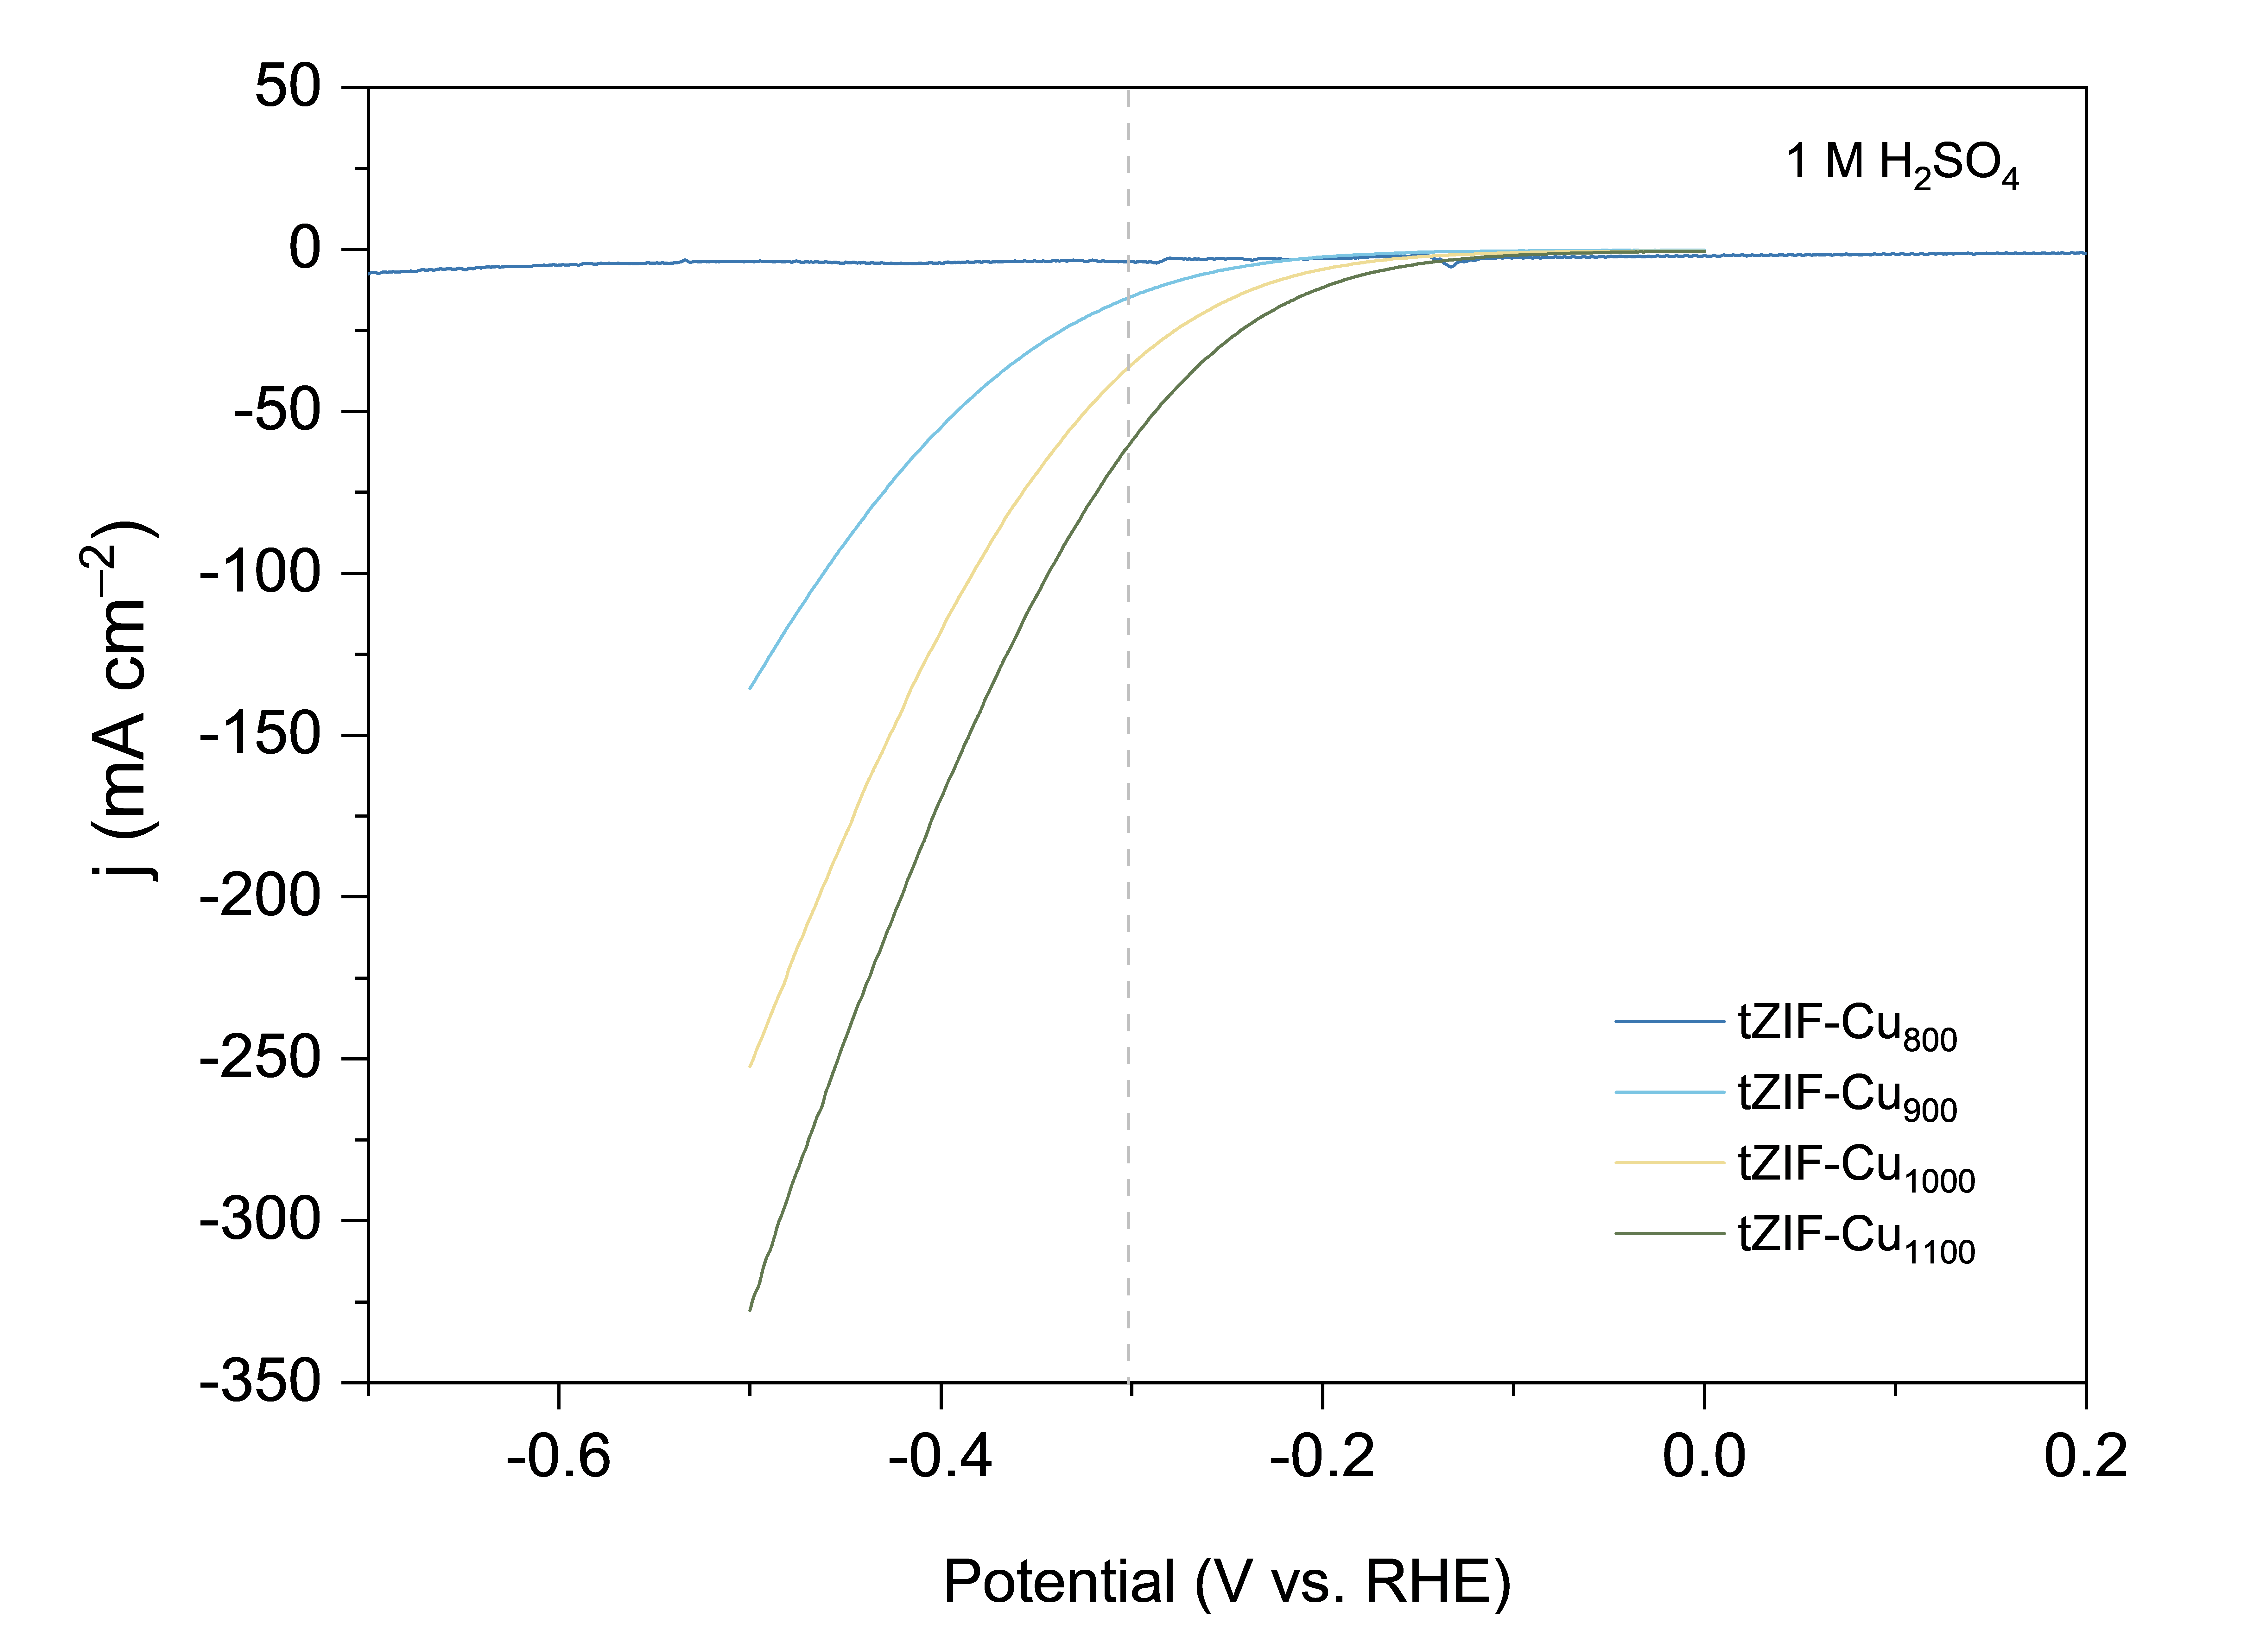


**Supplementary Fig. 21**. Linear sweep voltammetry (LSV) curves for hydrogen evolution reaction (HER) of tZIF-Cu series catalysts in 1.0 M H2SO4 electrolyte.


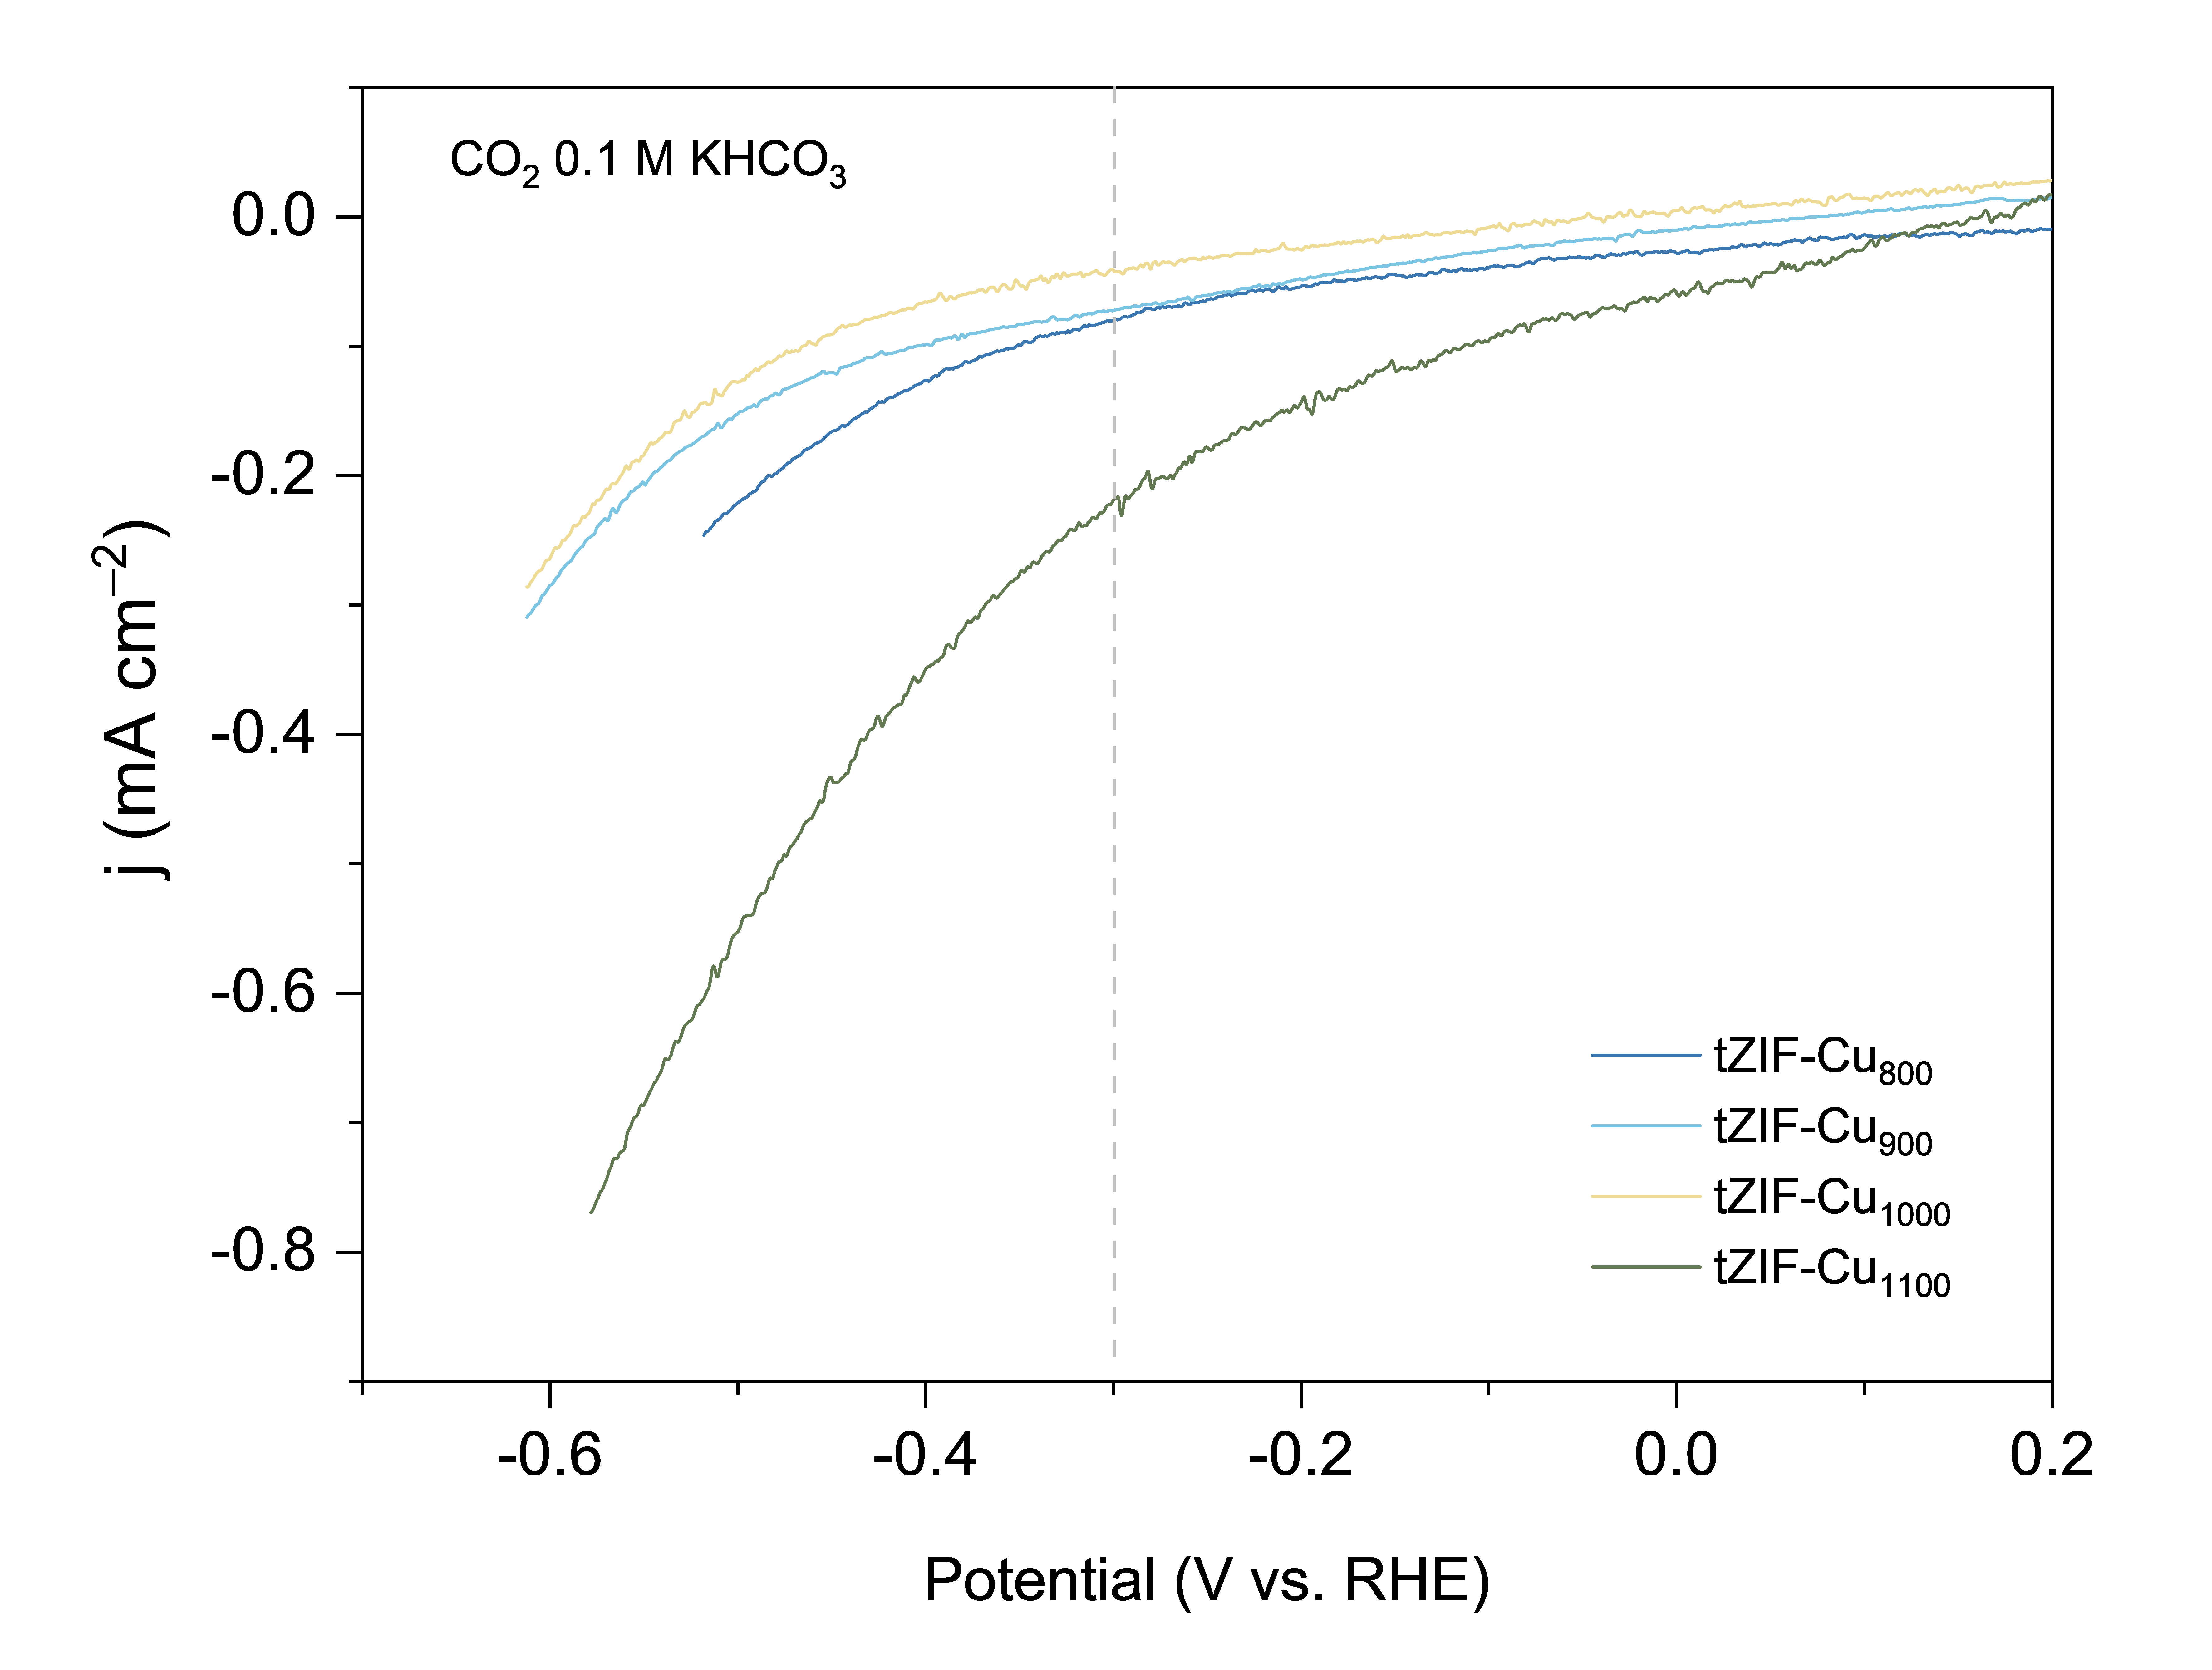


**Supplementary Fig. 22**. Linear sweep voltammetry (LSV) curves for carbon dioxide reduction reaction (CO2RR) of tZIF-Cu series catalysts in CO2-saturated 0.1 M KHCO3 electrolyte.


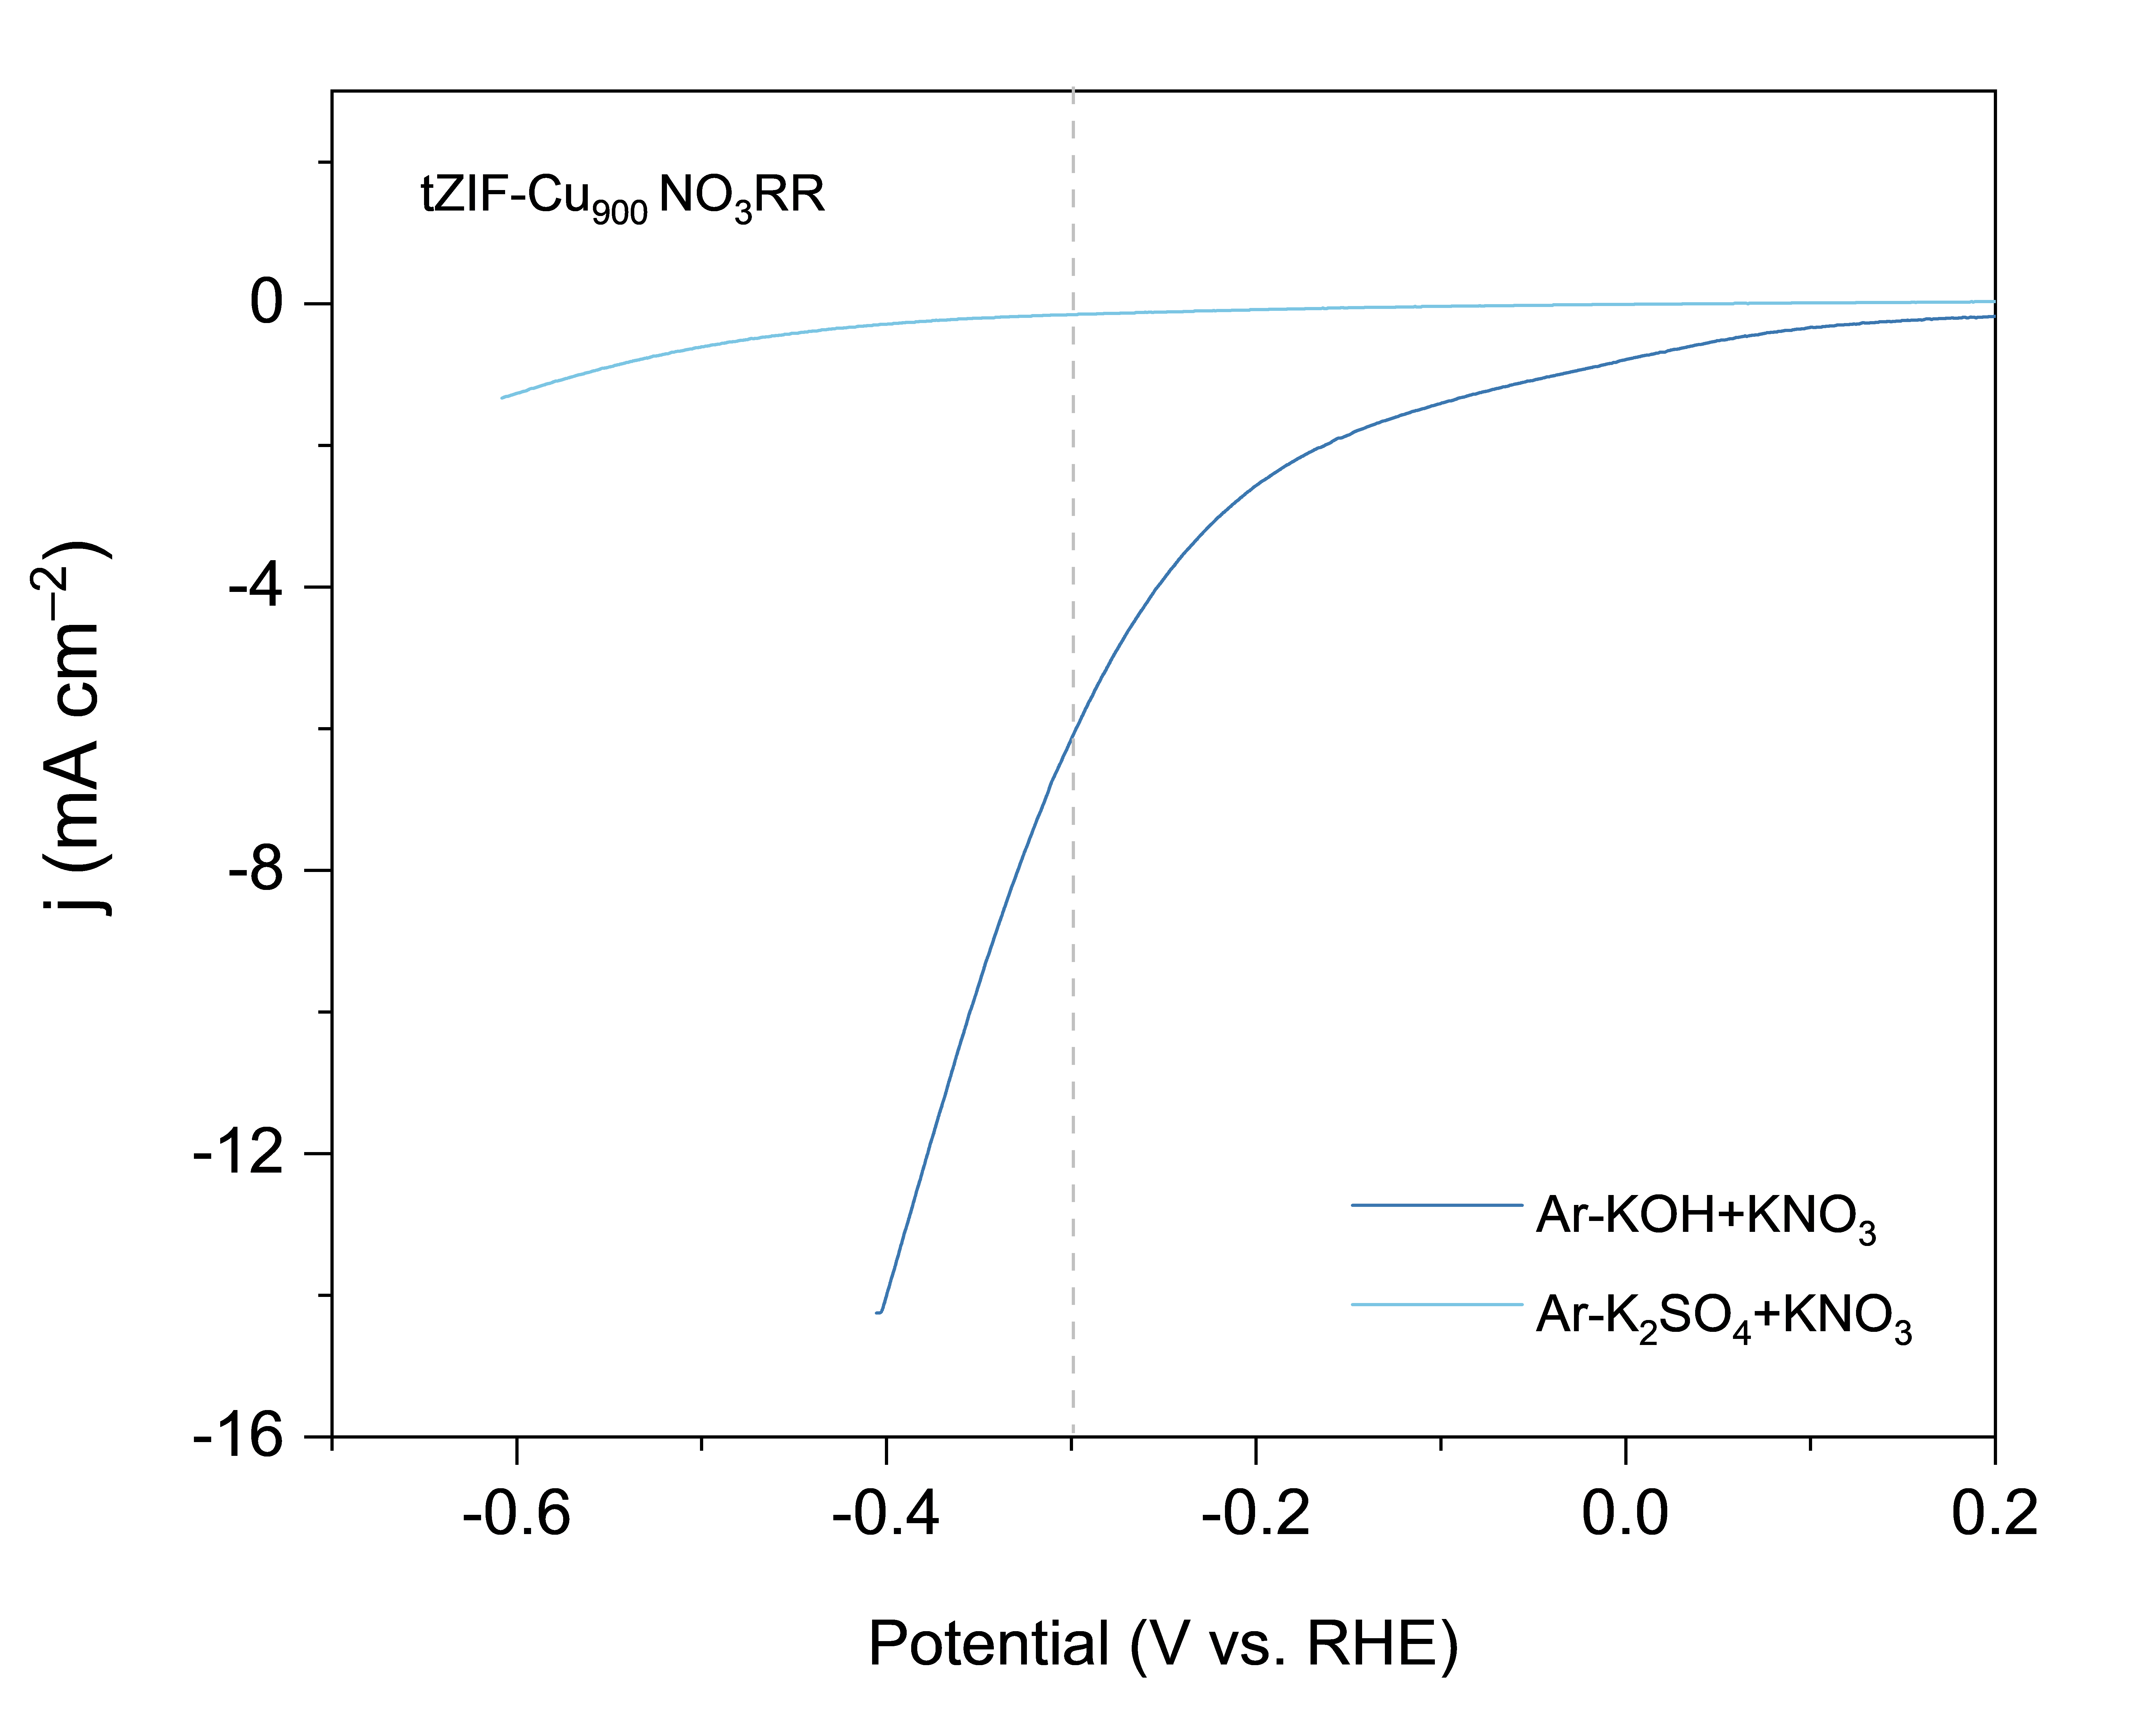


**Supplementary Fig. 23**. Linear sweep voltammetry (LSV) curves for NO3RR of tZIF-Cu900 in Ar-saturated alkaline (0.1 M KOH + 0.1 M KNO3) and neutral (0.1 M K2SO4 + 0.1 M KNO3) electrolytes.


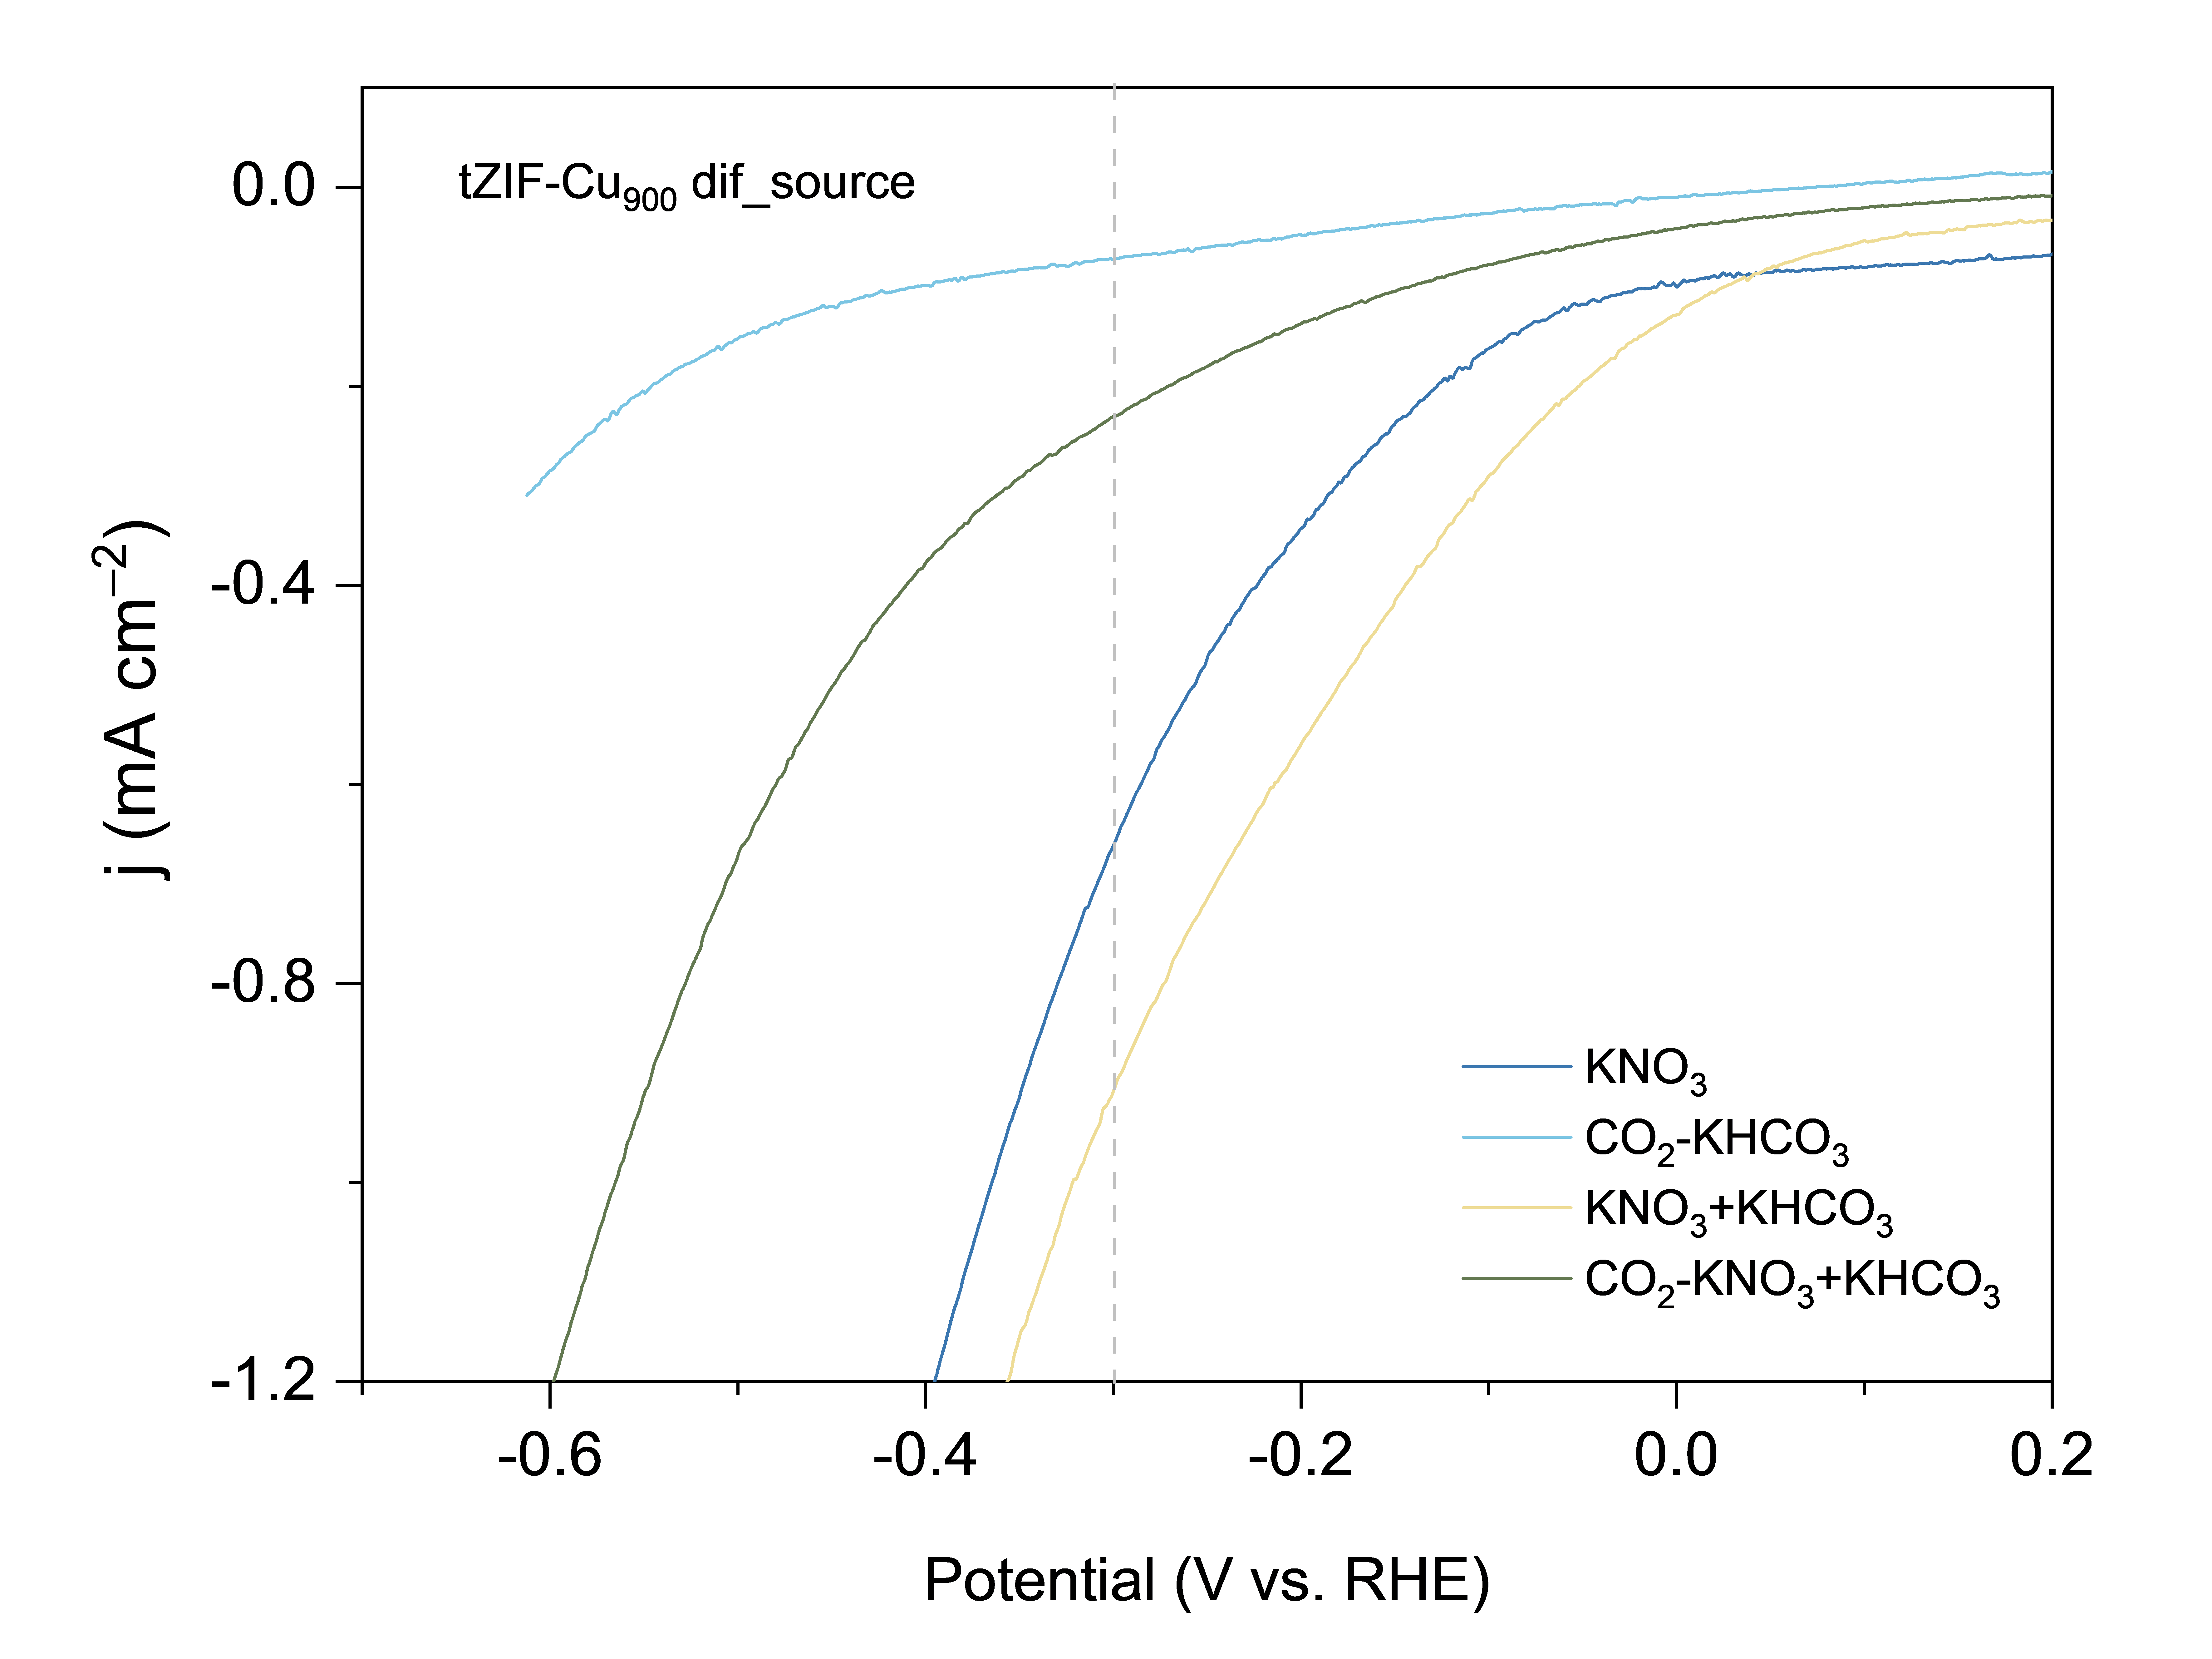


**Supplementary Fig. 24**. Linear sweep voltammetry (LSV) curves of tZIF-Cu900 in four electrolyte systems to verify the C-N co-reduction synergistic effect: (1) Ar-saturated 0.1 M KNO3, (2) CO2-saturated 0.1 M KHCO3, (3) Ar-saturated 0.1 M KNO3 + 0.1 M KHCO3, (4) CO2-saturated 0.1 M KNO3 + 0.1 M KHCO3.

For NO3RR tested in Ar-saturated 0.1 M K2SO4 + 0.1 M KNO3 electrolyte (Supplementary Fig. 20), at the same applied potential, tZIF-Cu900 exhibites the highest current density and the most positive onset potential among all samples, indicating the best NO3RR electrochemical activity. This may be related to the material's pore structure, the exposure level of active sites, and the coordination environment of copper species. In comparison, tZIF-Cu800 shows the lowest current density under the same potential, implying sluggish NO3RR reaction kinetics.

For HER tested in 1.0 M H2SO4 electrolyte (Supplementary Fig. 21), tZIF-Cu1100 shows the highest current density at the same negative potential, indicating the strongest HER activity among the four samples, while tZIF-Cu800 exhibited the weakest HER response. tZIF-Cu900 shows moderate HER activity, which may help avoid excessive competitive consumption of electrons and protons by the HER side reaction during the C–N coupling process.

For CO2RR tested in CO2-saturated 0.1 M KHCO3 electrolyte (Supplementary Fig. 22), tZIF-Cu1100 shows the highest current density at the same applied potential, while tZIF-Cu800, tZIF-Cu900 and tZIF-Cu1000 shows similar current responses with no significant difference. This suggests that the structural differences of the tZIF-Cu series have a weaker regulatory effect on CO2RR compared with NO3RR.

The pH dependence of NO3RR was tested in alkaline and neutral electrolyte systems (Supplementary Figs. 23–24). tZIF-Cu900 shows higher NO3RR current density and more positive onset potential in the alkaline 0.1 M KOH + 0.1 M KNO3 system than in the neutral 0.1 M K2SO4 + 0.1 M KNO3 system, which confirms that the alkaline system is more favorable for the NO3RR process of the catalyst, and is compatible with the CO2-saturated C-N co-reduction system.

When combined, these LSV results reveal that tZIF-Cu900 possesses the optimal activity balance for selective C–N coupling towards urea synthesis. The superior NO3RR activity of tZIF-Cu900 ensures efficient generation of *NO intermediates, the core nitrogen-containing building block for C–N coupling. Meanwhile, its moderate HER and CO2RR activity, compared to the excessively high HER/CO2RR activity of tZIF-Cu1100, effectively suppresses the two major parasitic reactions that compete for electrons and active sites. For tZIF-Cu1100, the dominant HER and CO2RR lead to rapid consumption of protons and electrons, as well as excessive *CO generation that cannot be matched by *NO supply, resulting in low C–N coupling selectivity and severe side reactions. For tZIF-Cu800, the sluggish NO3RR kinetics cannot generate sufficient *NO intermediates, limiting the C–N coupling rate despite its low HER/CO2RR activity. Only tZIF-Cu900 achieves the optimal kinetic matching between NO3RR and CO2RR, while suppressing competitive HER, which is the key to its near-unity urea selectivity and benchmark yield rate.


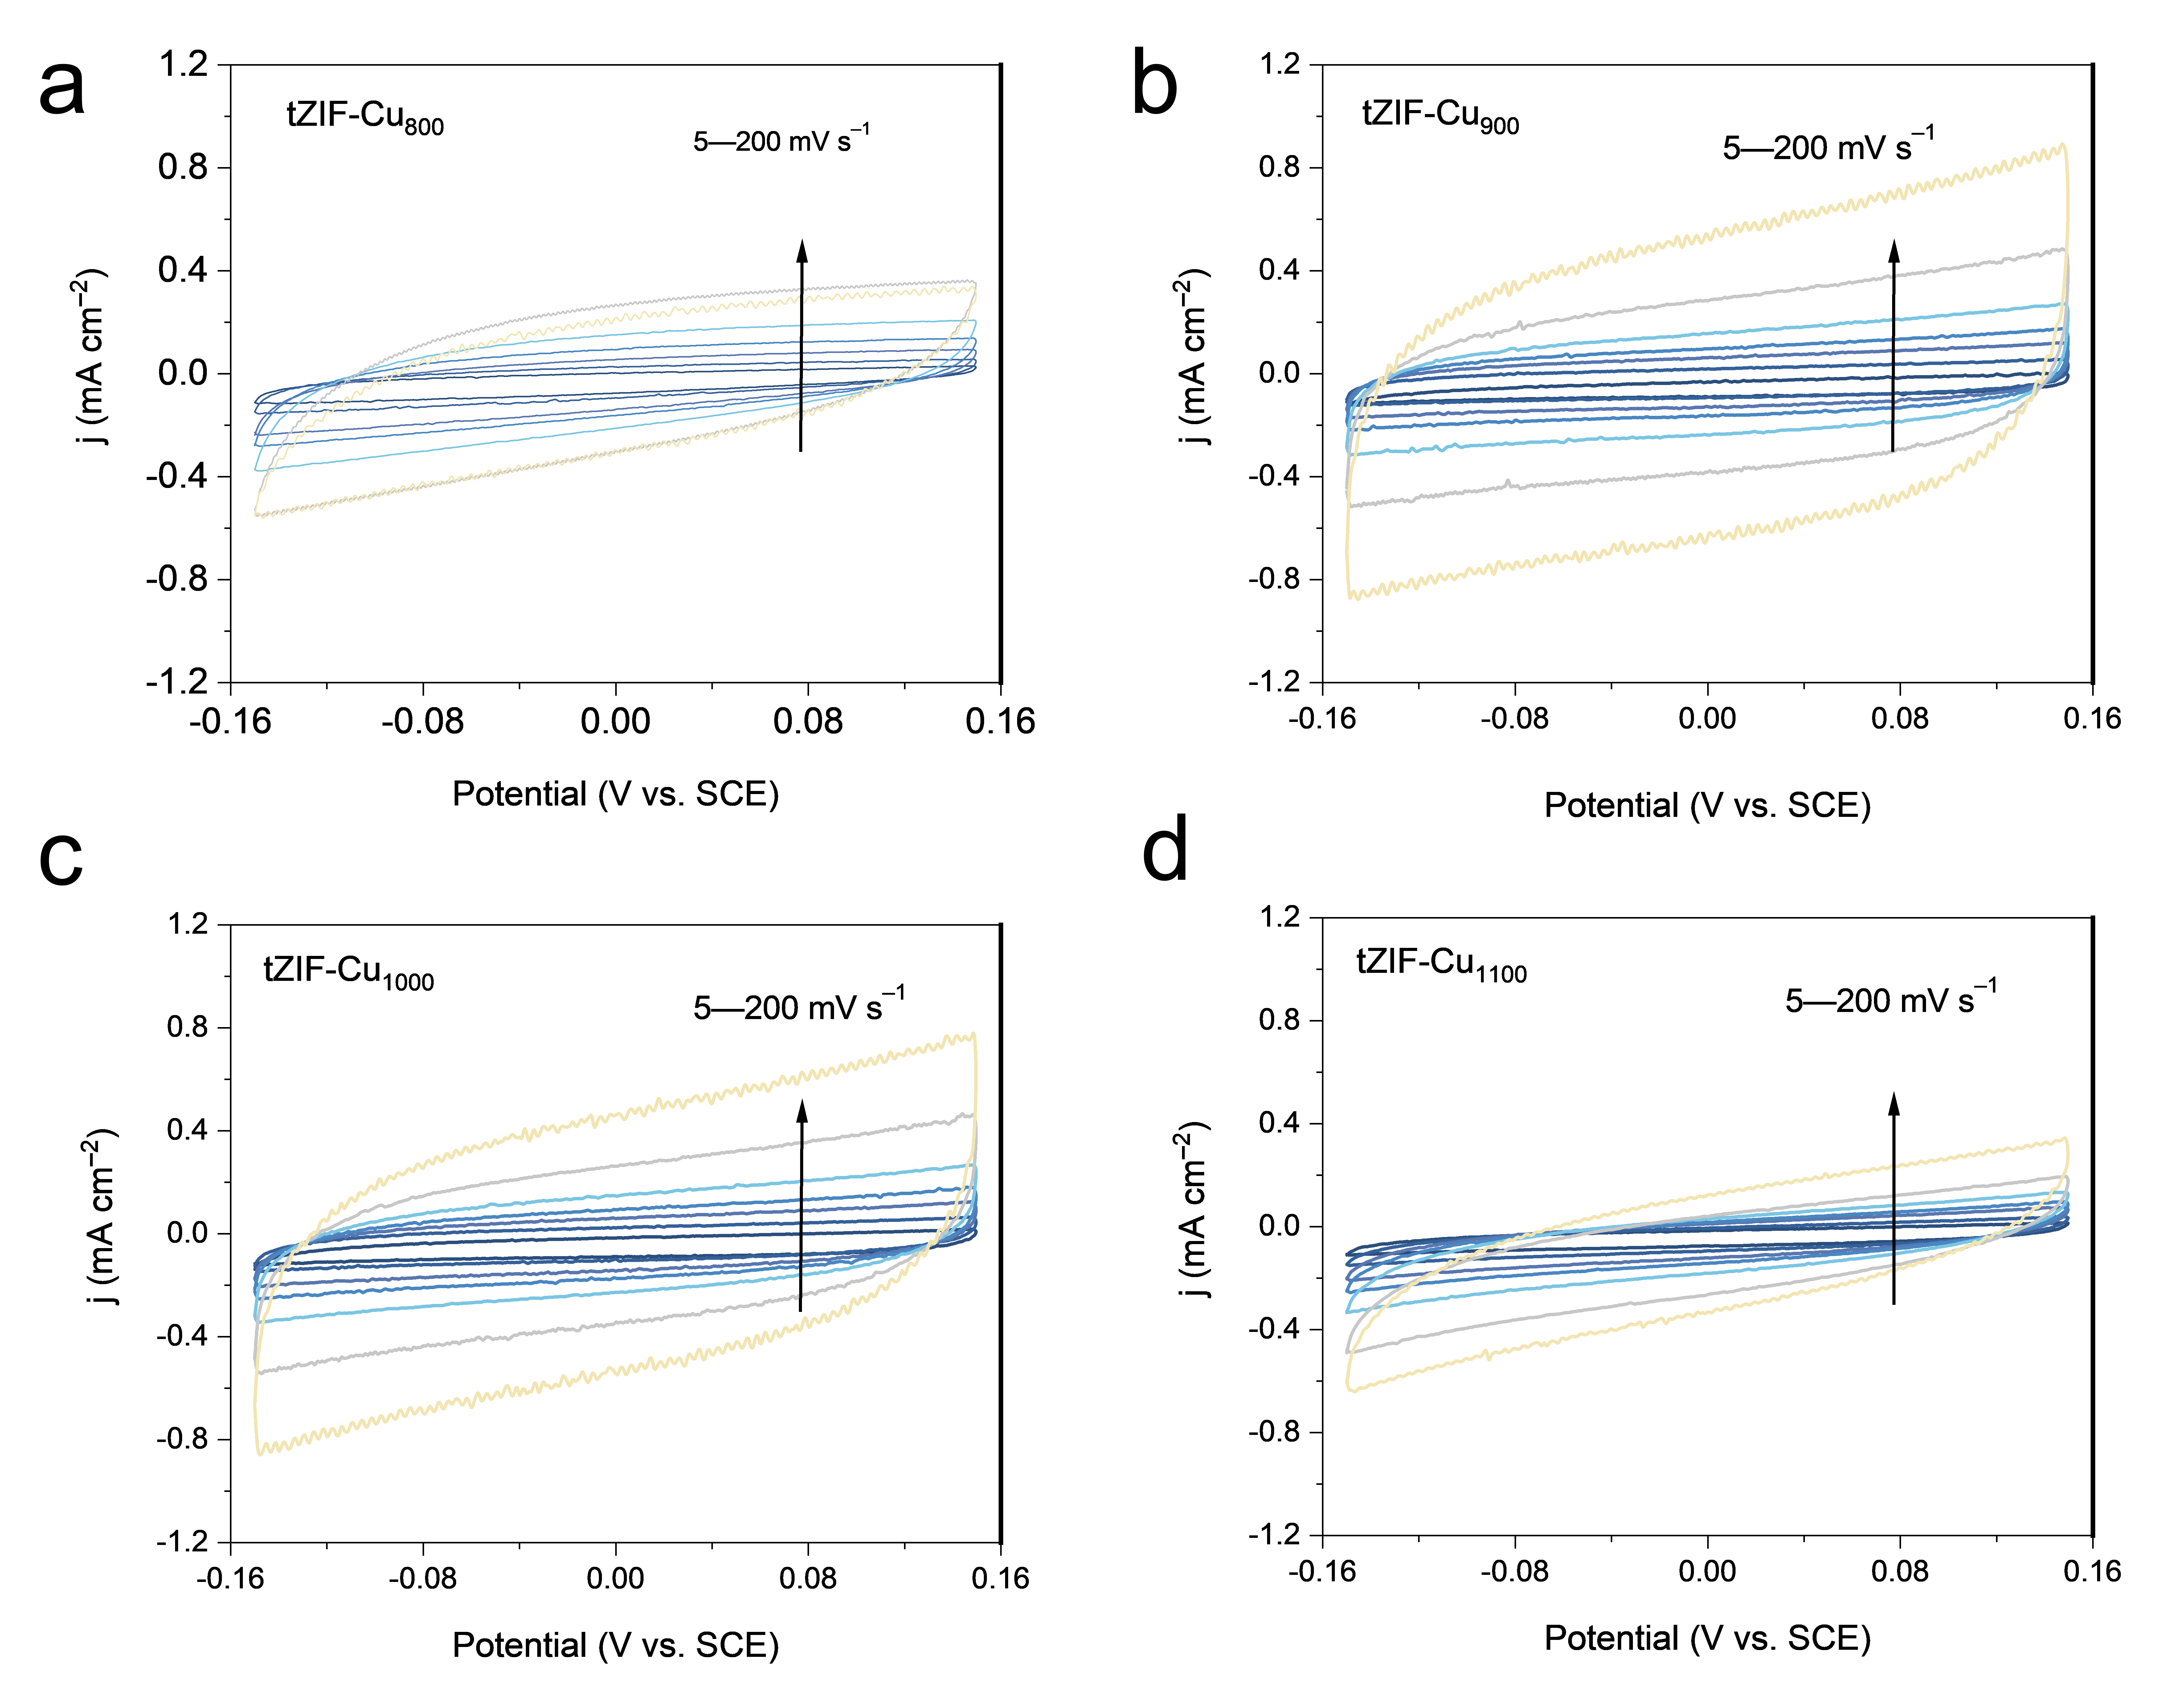


**Supplementary Fig. 25.** Cyclic voltammetry (CV) curves of (a) tZIF-Cu800, (b) tZIF-Cu900, (c) tZIF-Cu1000 and (d) tZIF-Cu1100 collected in the non-Faradaic potential region (–0.16–0.16 V vs. SCE) at scan rates of 5, 10, 20, 30, 50, 100, and 200 mV s–1.


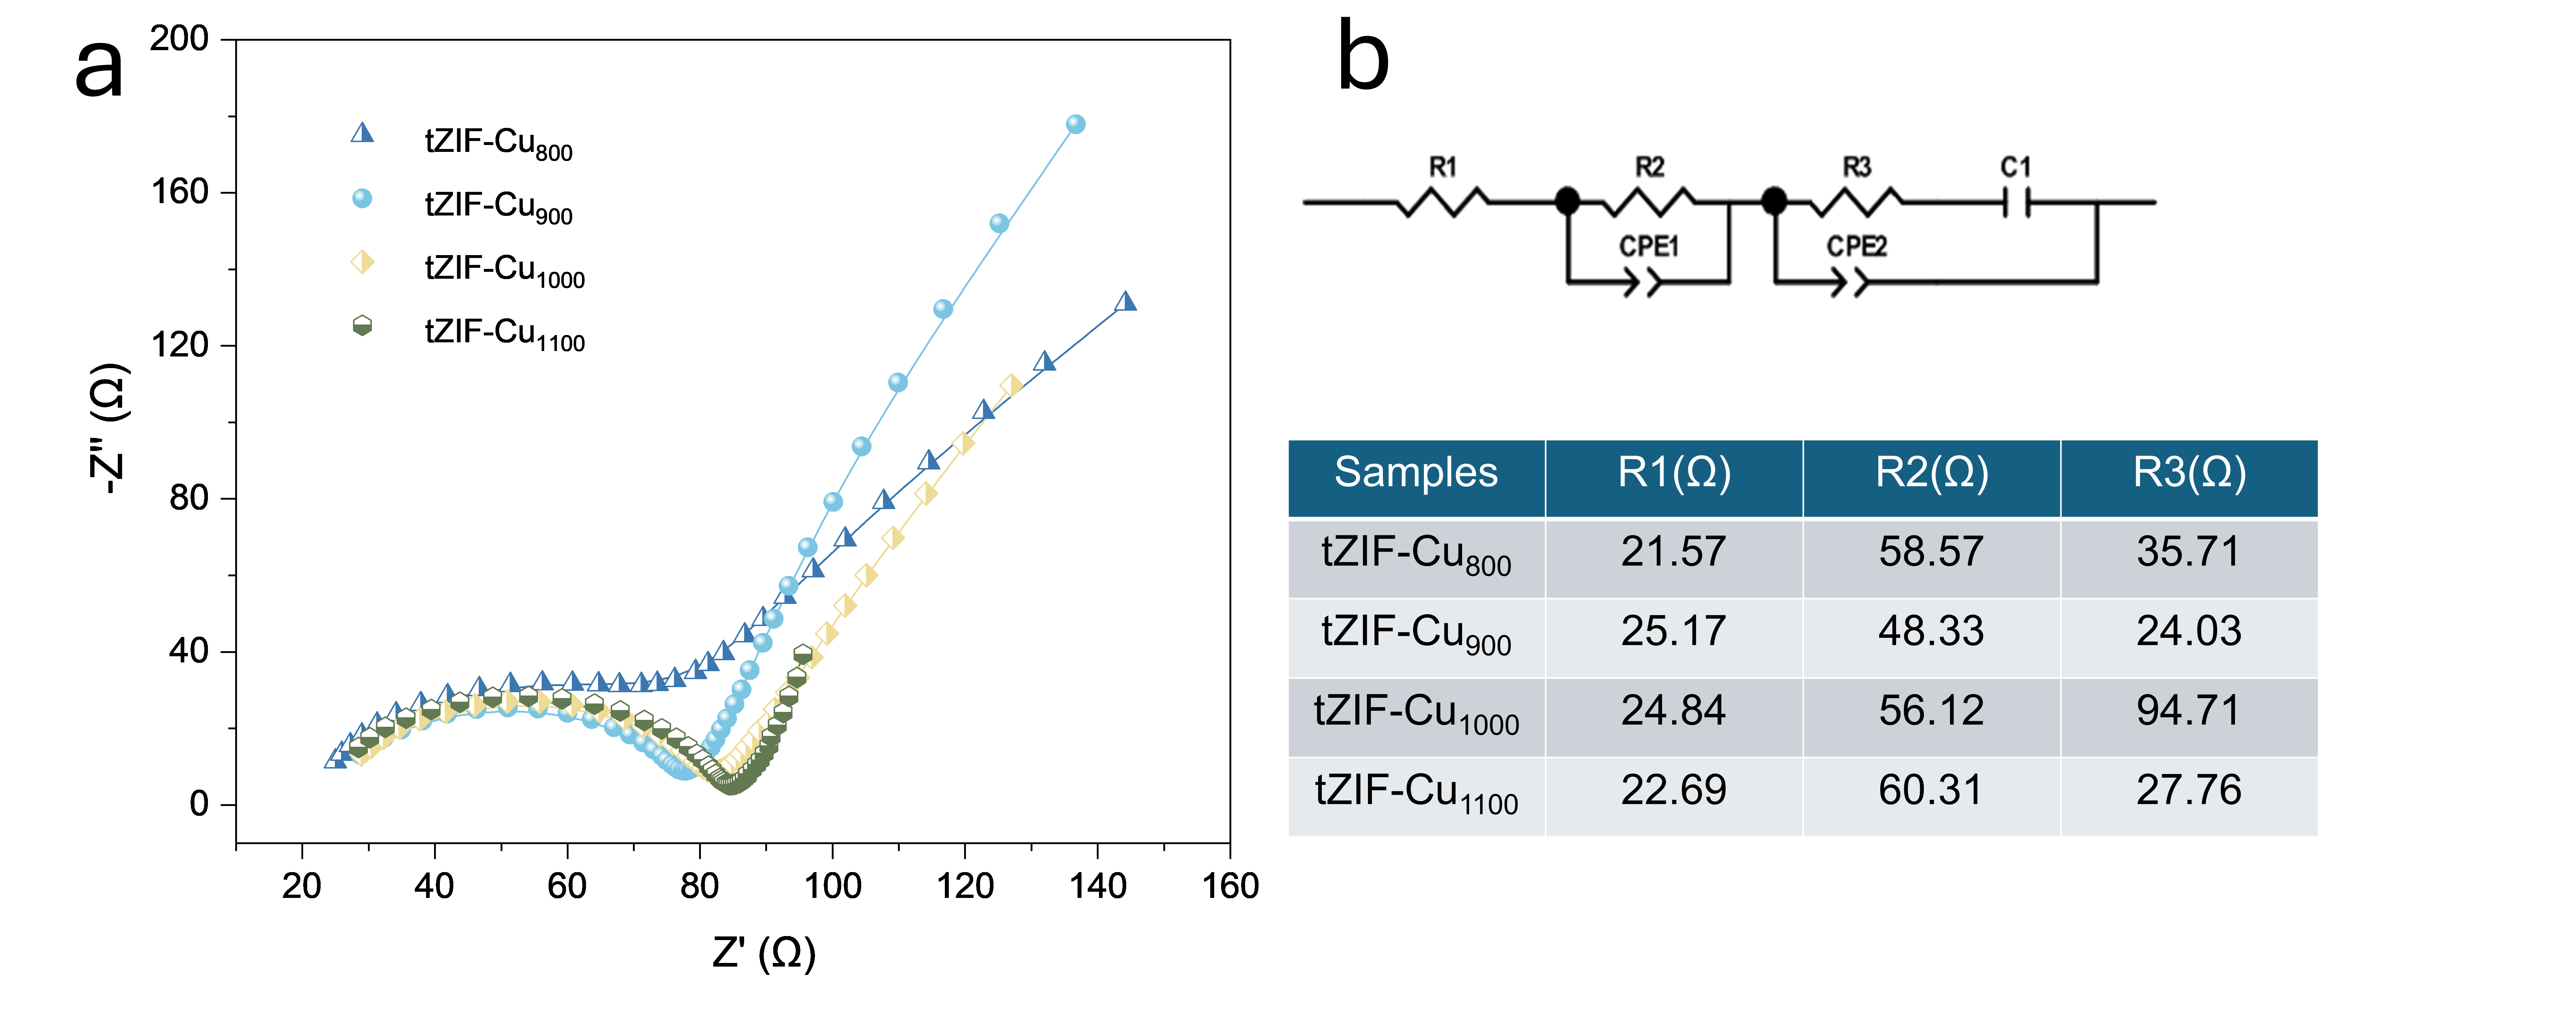


**Supplementary Fig. 26.** Electrochemical impedance spectroscopy (EIS) analysis of tZIF-Cu series catalysts in CO2-saturated 0.1 M KNO3 + 0.1 M KHCO3 electrolyte: (a) Nyquist plots and fitting curves, (b) equivalent circuit diagram and corresponding fitting parameters.

**Section 3.2. Reactors and electrosynthesis methods**

**Detailed introduction of the H-type electrochemical cell:** All electrochemical screening experiments were performed in a custom-built two-compartment H-type electrochemical cell. Both anodic and cathodic chambers were fabricated from high-purity borosilicate glass, with a nominal working volume of 50 mL for each compartment. The two chambers were hermetically separated by a pre-treated Nafion N117 proton exchange membrane. The membrane was pretreated via sequential boiling in 5 wt% H2O2 aqueous solution, 18.2 MΩ cm ultrapure deionized water, and 0.5 M H2SO4 solution for 1 h each, to remove residual impurities and ensure complete proton conductivity.

A standard three-electrode configuration was adopted for all tests. A SCE was fixed in the cathodic chamber as the reference electrode. A 99.99% high-purity platinum foil with dimensions of 1 cm × 2 cm was placed in the anodic chamber as the counter electrode. The working electrode was a 1 cm × 1 cm Toray TGP-H-060 carbon paper coated with uniform catalyst ink, secured by a corrosion-resistant electrode clamp. The catalyst ink was prepared by dispersing as-synthesized catalyst powder, 5 wt% Nafion ionomer, isopropanol and ultrapure water at a fixed stoichiometric ratio. The mixture was treated by bath sonication for 30 min to form a homogeneous suspension, which was quantitatively drop-casted onto the carbon paper and dried under vacuum at 60 °C for 2 h.

The cathodic chamber was fully sealed and equipped with a polytetrafluoroethylene (PTFE) coated magnetic stirring bar for continuous agitation at 400 rpm. Continuous CO2 purging with a purity of 99.99% was performed at a constant flow rate of 20 mL min–1 through the catholyte. Dedicated gastight liquid and gas sampling ports were installed on the cathodic chamber for periodic aliquot collection. All electrochemical measurements were conducted with 85% iR-drop compensation to correct for the ohmic resistance of the electrolyte.

**Detailed introduction of the gas diffusion electrode (GDE) flow reactor:** Subsequent performance validation and catalyst loading optimization were carried out in a custom designed GDE flow reactor. The main reactor body was fabricated from high-strength, chemically inert polymethyl methacrylate, to ensure excellent structural stability and visual process monitoring. The electrolyzer adopted a membrane-separated dual-compartment configuration consistent with the H-type cell. A single-flow cathodic chamber was coupled to a 50 mL external electrolyte reservoir filled with electrolyte, driven by a variable-speed peristaltic pump at a constant flow rate of 50 mL min–1 for closed-loop electrolyte circulation.

The working electrode had an identical 1 cm × 1 cm geometric active area as the H-type cell counterpart, using the same Toray TGP-H-060 carbon paper substrate. The as-prepared catalyst layer was coated on the electrolyte-facing side, and a hydrophobic microporous layer was coated on the gas-facing side to facilitate gas transport and prevent electrolyte flooding. Two precision machined graphite serpentine flow field plate was integrated on the both side of the GDE, with 1 mm-wide, 1 mm-deep flow channels at a 1 mm pitch to ensure uniform electrolyte and CO2 distribution across the electrode active area. 99.99% CO2 was fed at a controlled flow rate of 20 mL min–1.

The three-electrode configuration was fully consistent with the H-type cell system. A saturated calomel electrode was inserted directly into the cathodic flow channel as the reference electrode. A IrO2/Ti mesh counter electrode was positioned in the anodic chamber, separated by the same pre-treated Nafion N117 proton exchange membrane. Dedicated gastight sampling ports were installed for real-time product quantification. All electrochemical tests were performed with the same iR-drop compensation protocol as the H-type cell experiments, to ensure data consistency and cross-system comparability.


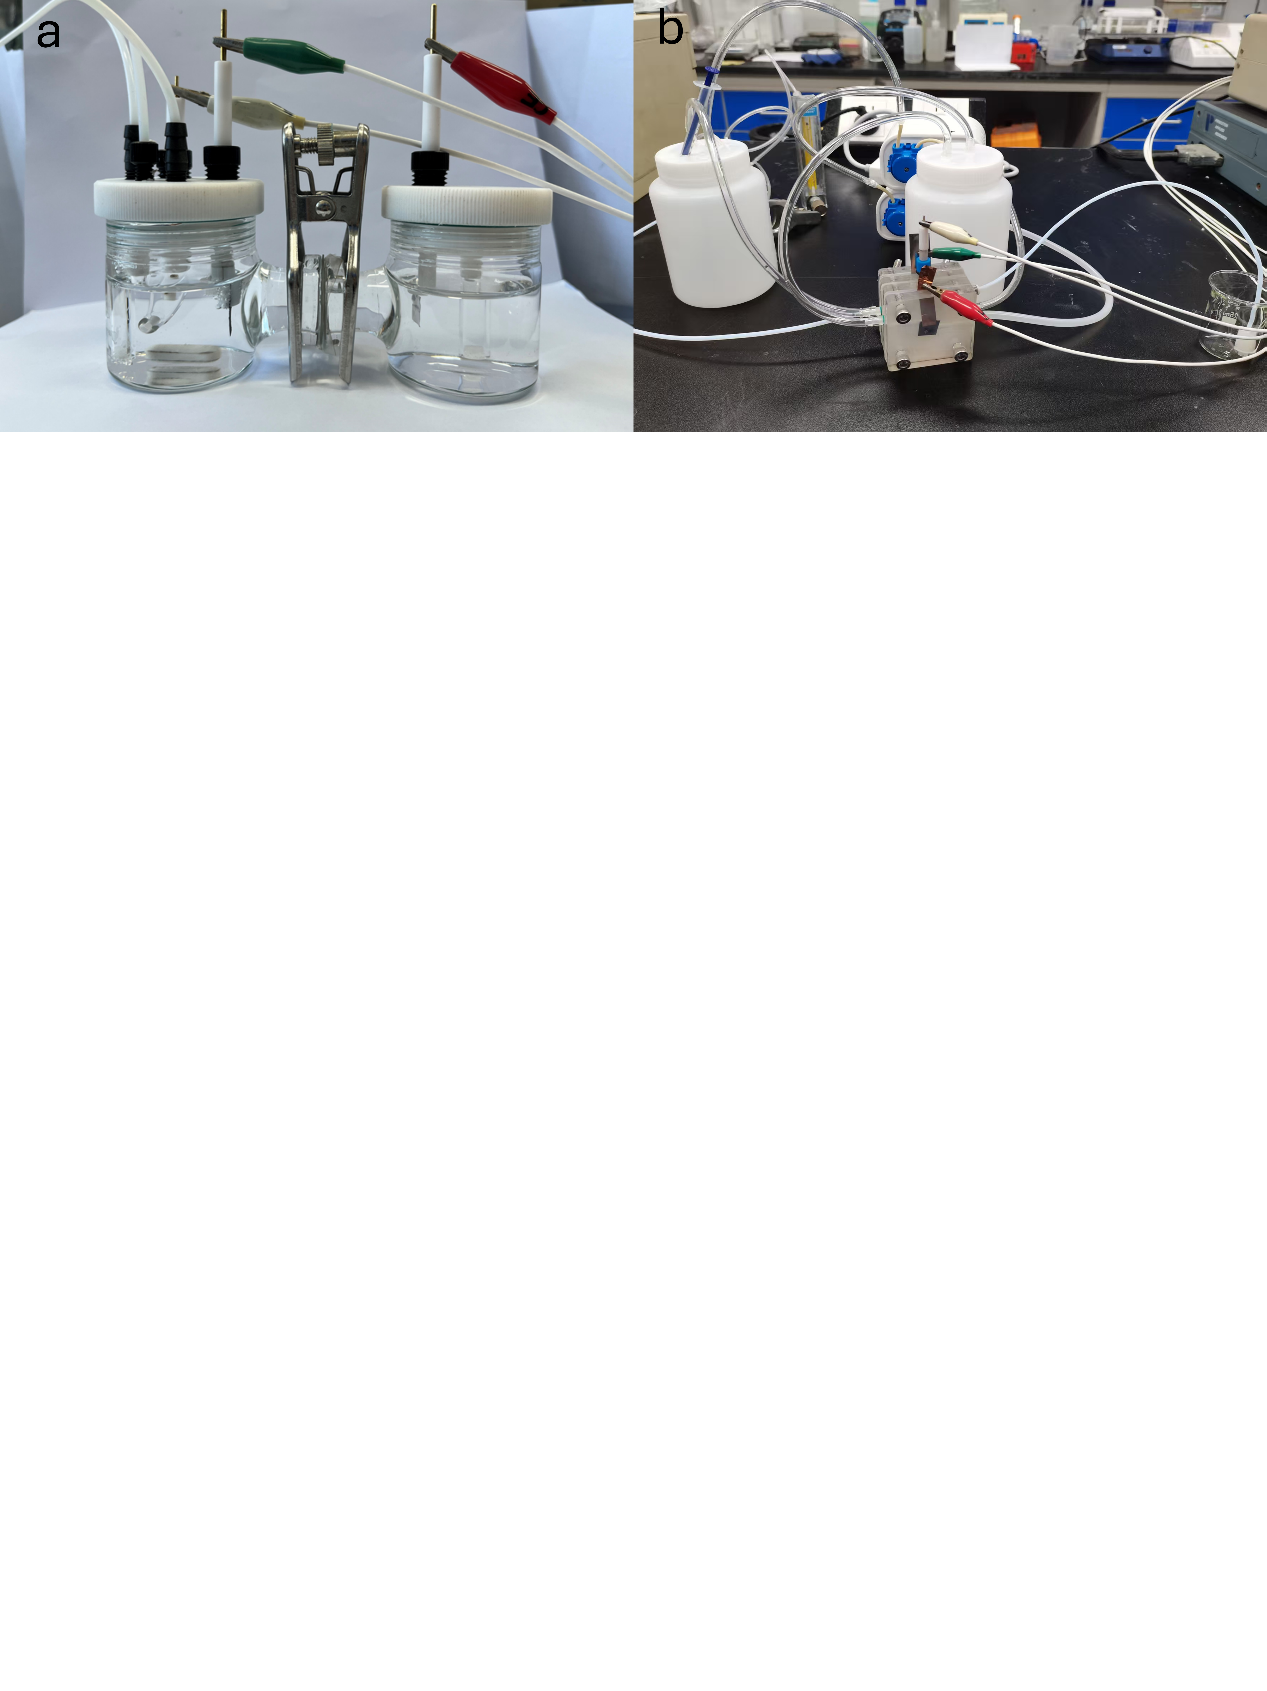


**Supplementary Fig. 27**. Schematic diagram of the electrocatalytic reactors used in this work: (a) two-compartment H-type electrolytic cell, (b) gas diffusion electrode (GDE) flow reactor.

**Rationale and necessity of the two-step strategy:** This two-step experimental strategy was rationally designed to balance rigorous mechanistic validation and application-oriented performance optimization, addressing the intrinsic limitations of single-system testing for electrocatalytic C–N coupling reactions. The H-type cell, as a well-defined, batch-operated system with fully controllable reaction parameters, enables high-throughput parallel screening of catalysts with gradient pore structures under identical mass transport and electrochemical conditions, eliminating interferences from flow field distribution and gas-phase diffusion. This ensures that the observed differences in activity and urea selectivity are exclusively attributed to the pore confinement effect of the catalysts, rather than extrinsic system factors, providing a highly credible intrinsic performance ranking of all candidate catalysts. The subsequent GDE flow cell testing is indispensable, as it mitigates the CO2 solubility and mass transport limitations inherent to liquid-phase H-type cells19, closely mimicking the high-flux reaction conditions of practical industrial electrolysis. Catalyst loading optimization in the GDE system is critical to balance electron conduction, electrolyte penetration, gas diffusion, and active site accessibility, bridging the gap between lab-scale intrinsic activity screening and application-level performance validation, and ensuring the pre-screened optimal catalyst delivers stable and efficient performance under practically relevant operating conditions.

**Section 3.3. Quantitative methods**

**Determination of urea by diacetylmonoxime method:** The amount of urea produced in the electrolyte was determined by diacetylmonoxime (DAMO) method20. Typically, 1 mL electrolyte was added into 2 mL acid-ferric solution (100 mL concentrated phosphoric acid, 300 mL concentrated sulfuric acid, 600 mL deionized water and 100 mg ferric chloride). And then 1 mL DAMO-thiosemicarbazide (TSC) solution (5 g DAMO and 100 mg TSC were dissolved in 1000 mL deionized water) was added into the mixture. After that, the solution was heated to 100 °C and maintained for 20 min, then cooled to room temperature, UV-vis absorption spectrum was performed and the absorbance at 525 nm was acquired. A series of standard urea solutions were used to obtain working curves for urea determination.


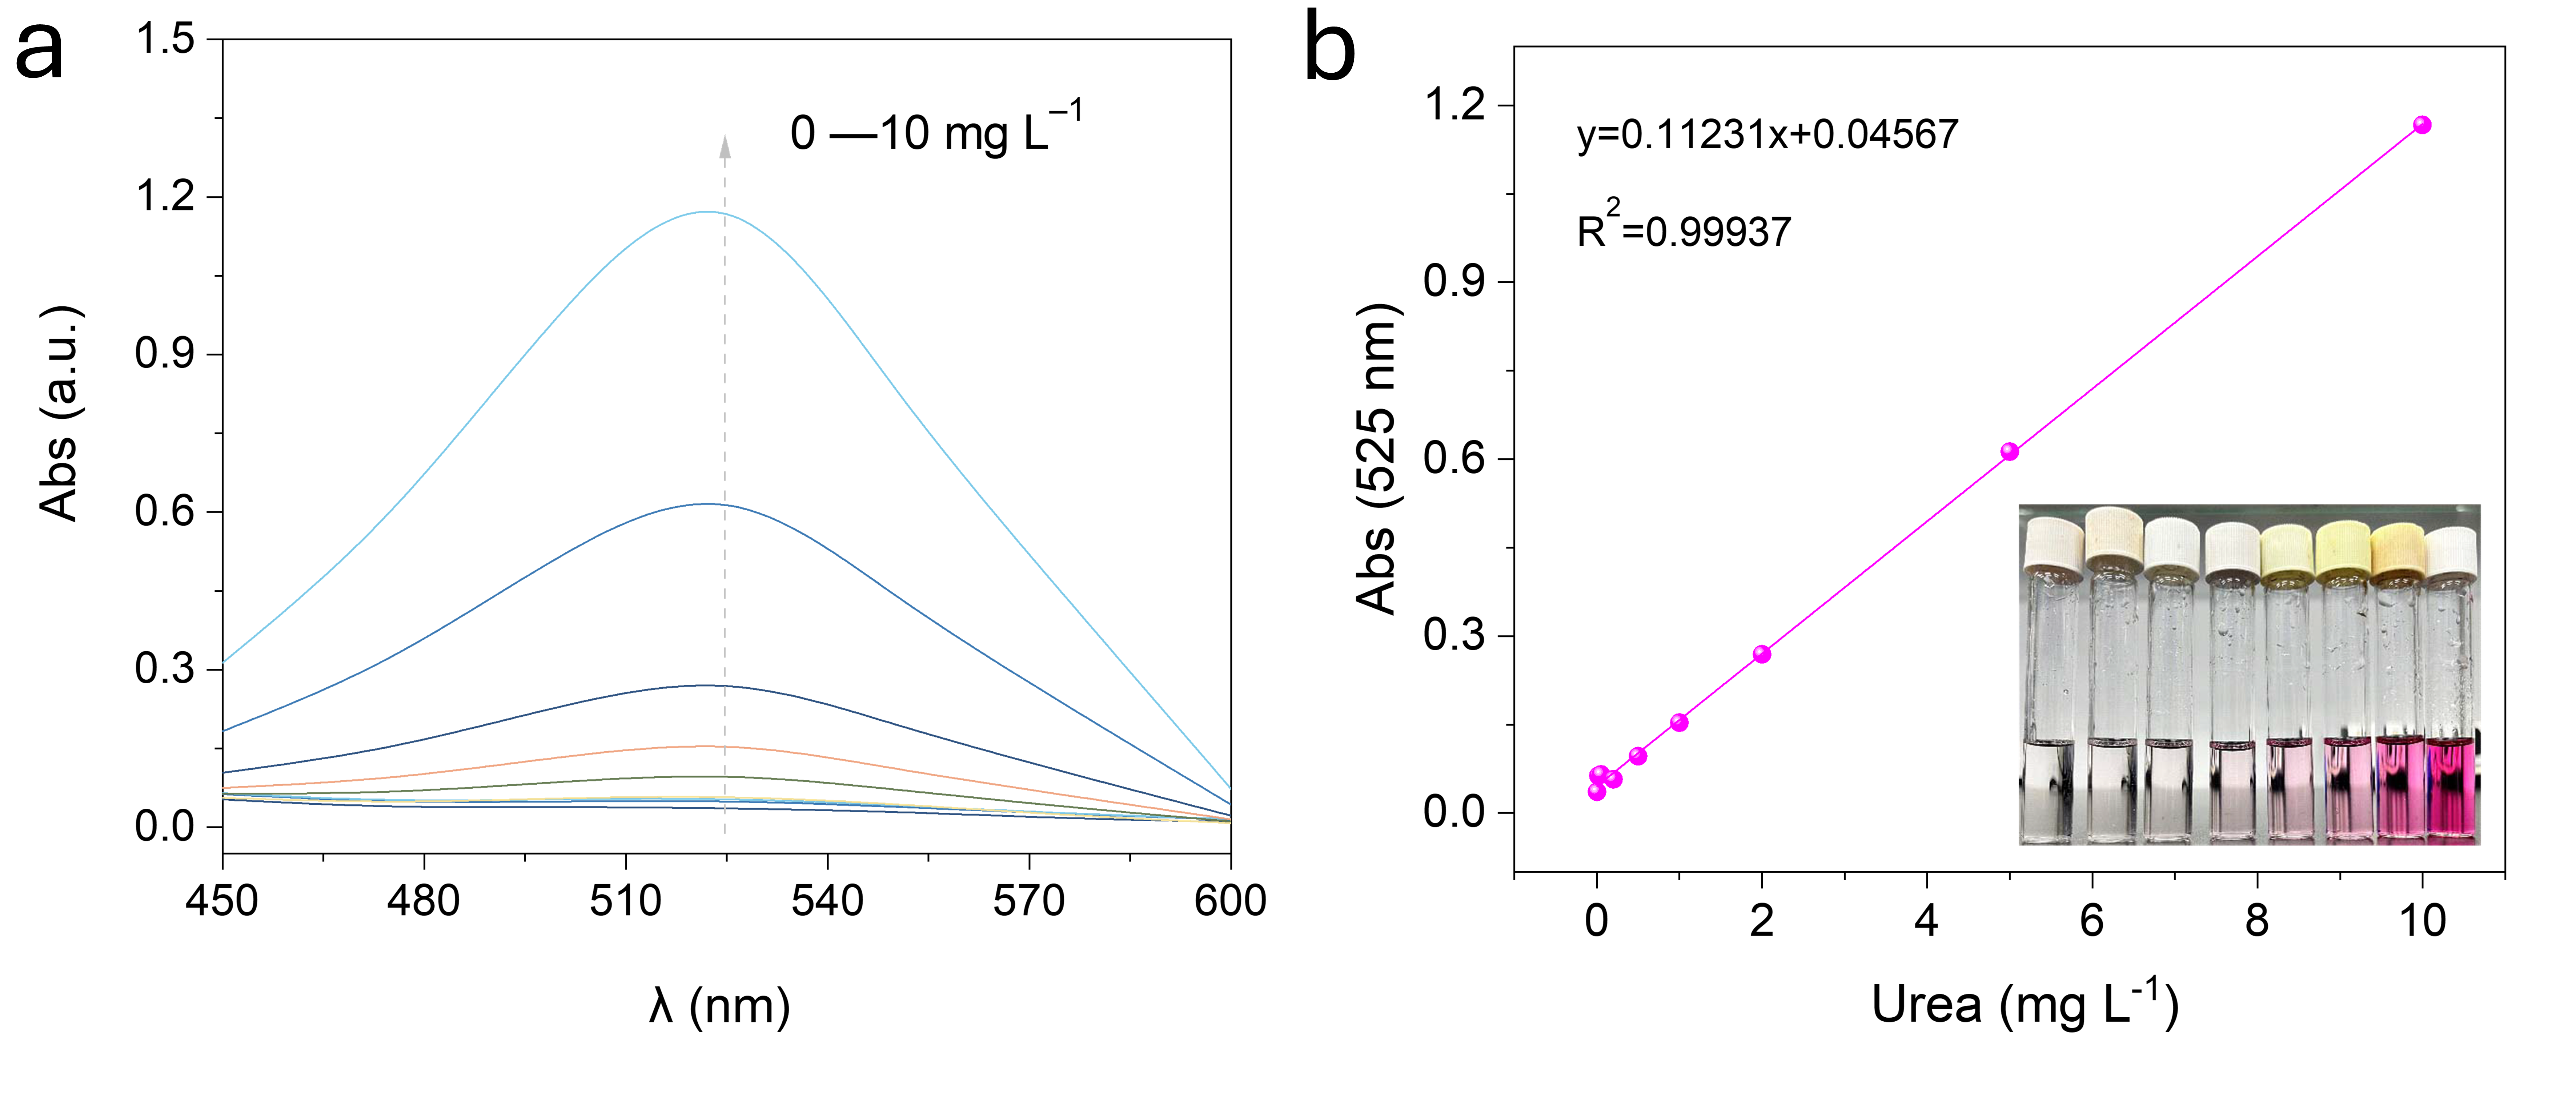


**Supplementary Fig. 28.** Calibration of the diacetylmonoxime-thiosemicarbazide (DAMO-TSC) colorimetric method for urea quantification: (a) UV-vis absorption spectra of urea standard solutions with gradient concentrations, (b) linear calibration curve.

**Determination of urea by 1H-NMR:** The detailed procedure for urea quantification using 1H-NMR spectroscopy is summarized as follows: 50 μL of the electrolyte was added to 600 μL of DMSO-d6. Subsequently, the solution underwent 1H-NMR measurement on a Bruker AVIII 400 MHz NMR spectrometer with water suppression using the excitation sculpting method to obtain an accumulated result of 512 scans.


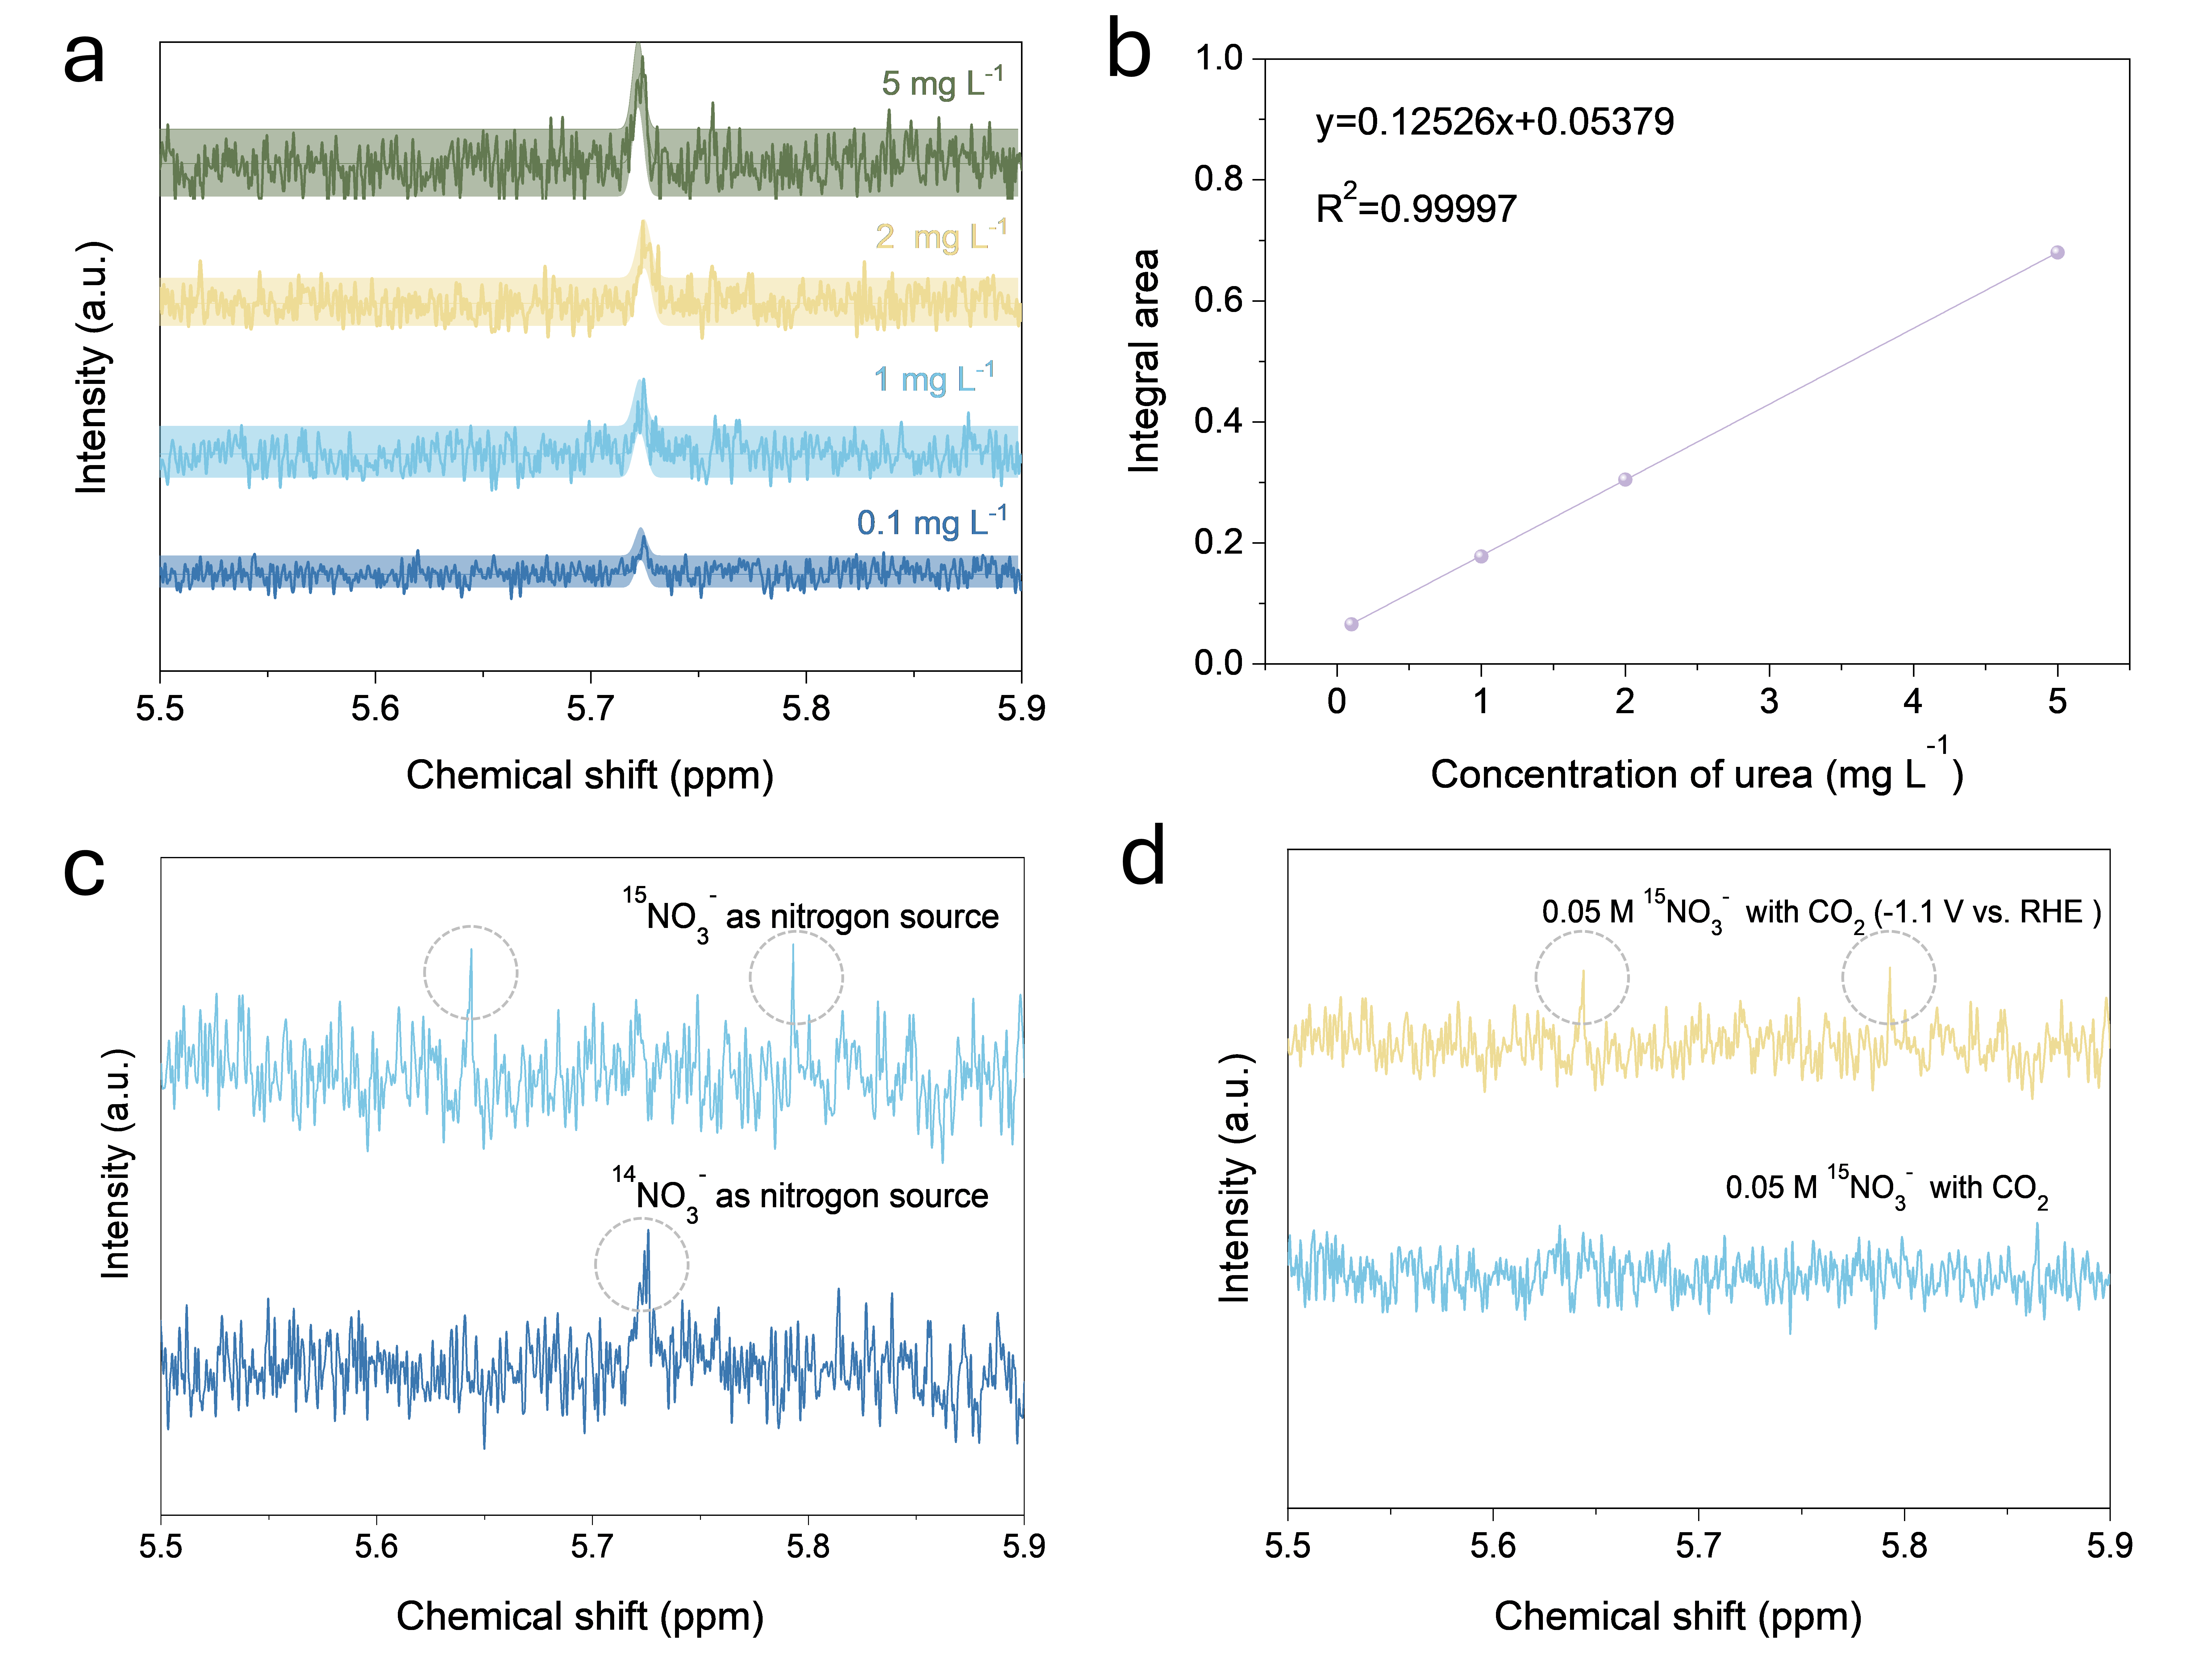


**Supplementary Fig. 29.** Quantitative ¹H NMR analysis of urea and isotope labeling verification: (a) 1H NMR spectra of urea standard solutions with gradient concentrations, (b) linear calibration curve for urea quantification, (c) 15N NMR spectra of 15N-urea and 14N-urea, (d) 15N NMR spectra of the electrolyte after electrolysis at 0 V and –1.1 V vs. RHE with 15N-labeled KNO3 as the nitrogen source.

**Determination of urea by urease decomposition**21**:** EDTA (0.1 g) was dissolved in a urease solution (10 mL, 5 mg mL–1). Subsequently, an electrolyte solution (1.8 mL) was added to the mixture (0.2 mL). The resulting solution was then incubated for 40 min at 37 °C on a shaker. The ammonia produced was quantified using the spectrophotometric indophenol blue method.

**Determination of ammonia (**NH3**)22:** To 10 mL of the collected electrolyte, 1 mL of potassium sodium tartrate (NaKC4H4O6) and 1 mL of alkaline mercuric iodide solution (HgI-KI-NaOH) were added sequentially. The mixture was shaken thoroughly and left to stand for 10 min to complete chromogenic reaction. Absorbance of the final solution was measured at 420 nm via a UV-vis spectrophotometer. A calibration curve is established using a series of standard ammonia solutions with absorbance recorded at the identical wavelength, and the curve was utilized to quantify the ammonia concentration in the test sample.


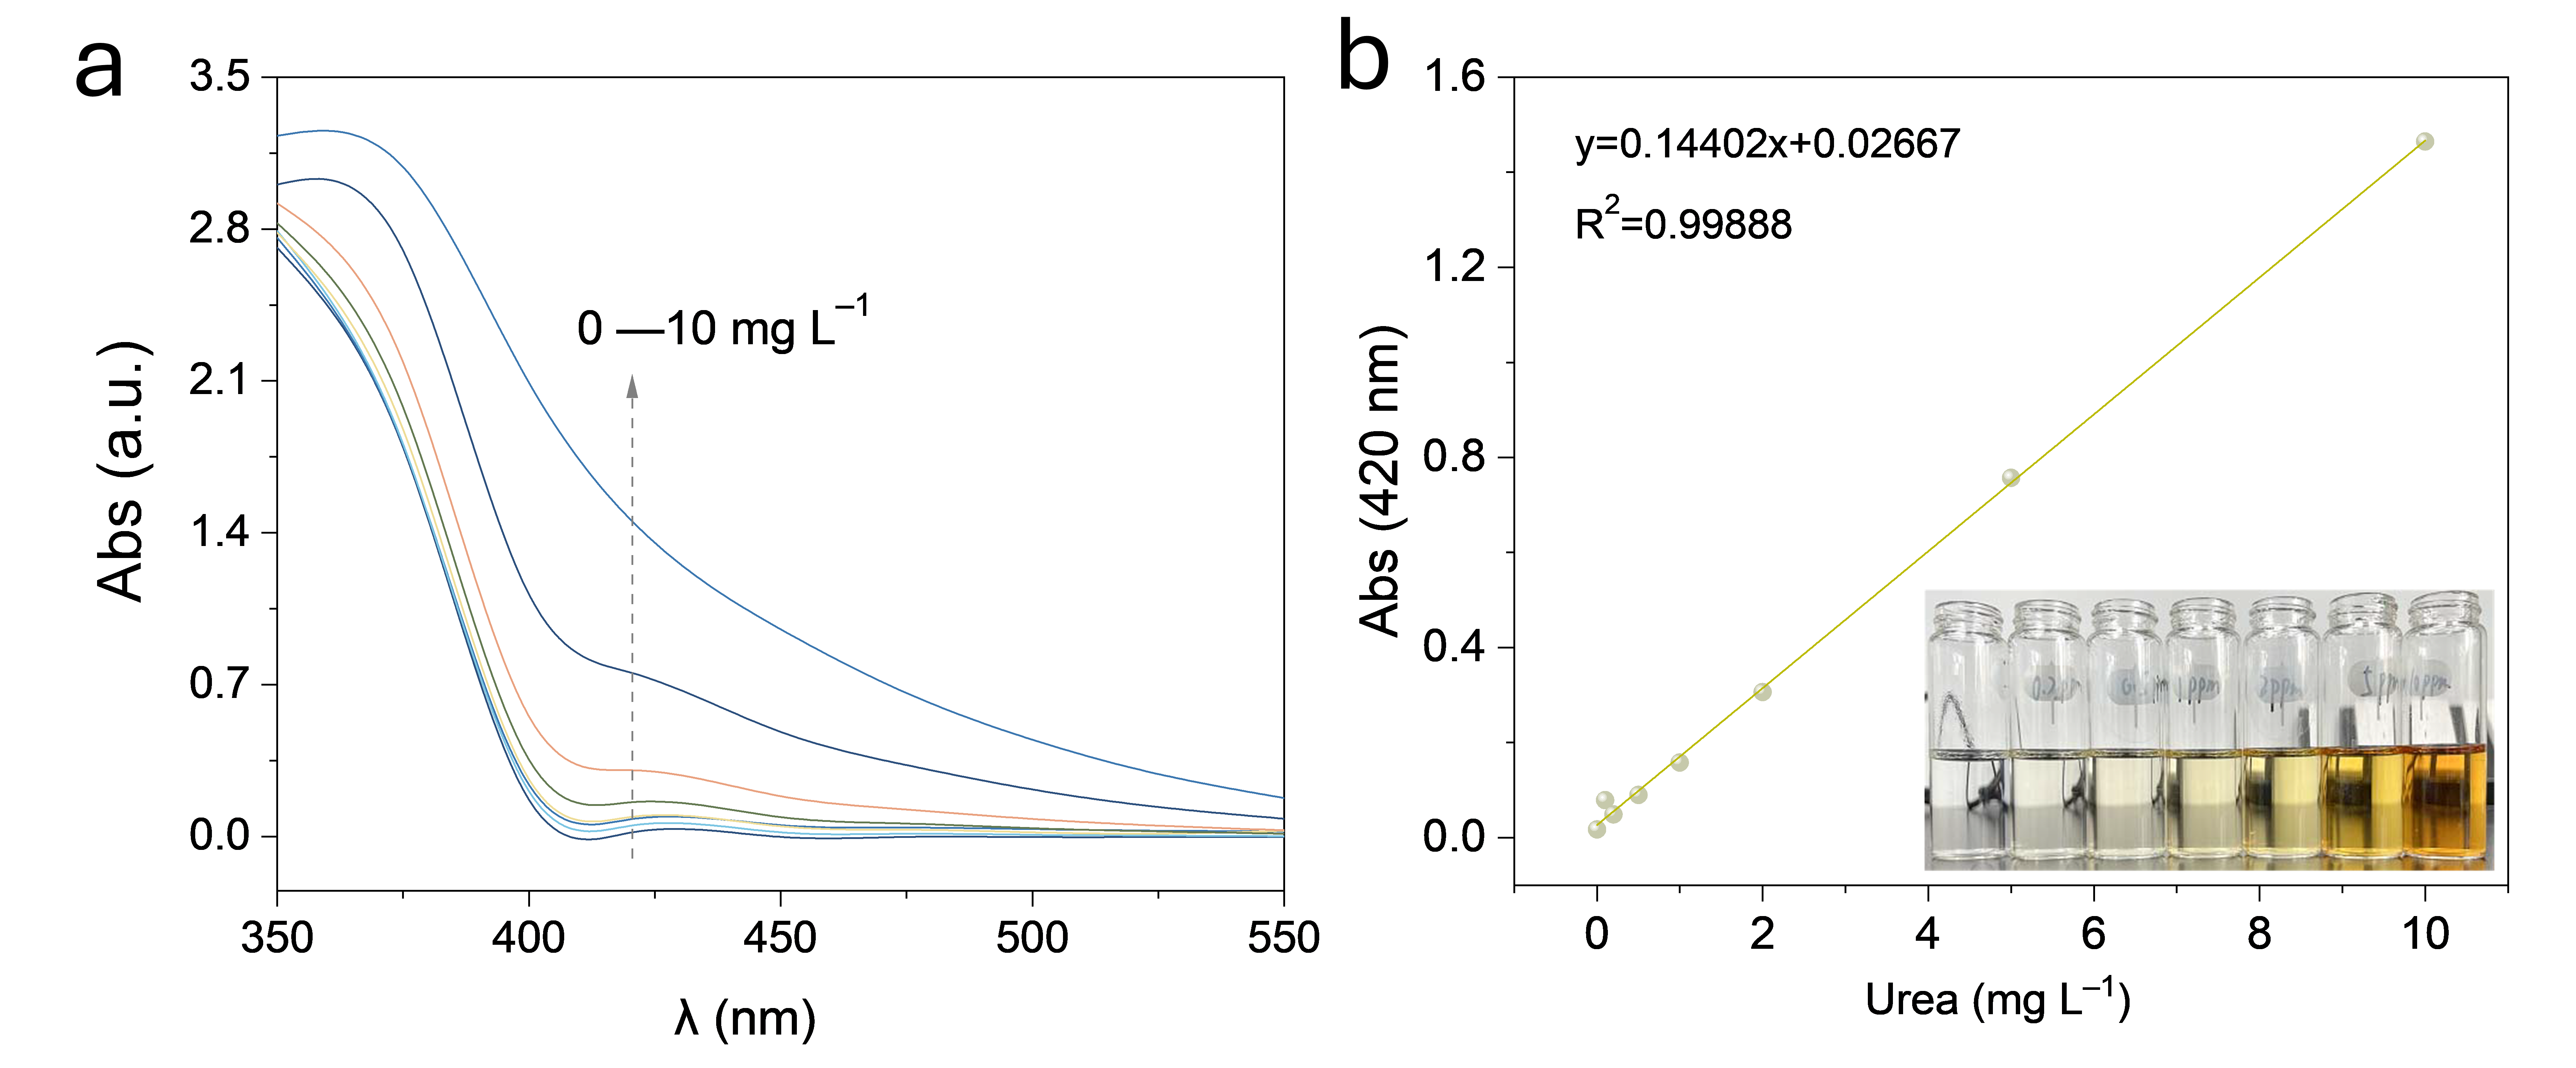


**Supplementary Fig. 30**. Calibration of the Nessler's reagent colorimetric method for ammonium (NH4+) quantification: (a) UV-vis absorption spectra of NH4+ standard solutions with gradient concentrations, (b) linear calibration curve (0–10 mg L–1).

**Determination of nitrite ions (**NO2–**):** First chromogenic reagent was prepared by dissolving 0.15 g of sulfanilamide in 50.0 mL of 2.0 M HCl solution, while the second chromogenic reagent was prepared by dissolving 20.0 mg of *N*-(1-naphthyl) ethylenediamine dihydrochloride in 20.0 mL of ultrapure water. 3.0 mL of standard solution or test electrolyte was transferred into a test tube, followed by the addition of 200 μL of the first chromogenic reagent. After mixing, the solution was left to stand for 10 min, then the second chromogenic reagent was added, and the mixture is shaken fully and incubated for 30 min. Absorbance was measured at 540 nm with a UV-Vis spectrophotometer, and a pre-constructed calibration curve from standard nitrite solutions was adopted to determine the nitrite ion concentration.

.


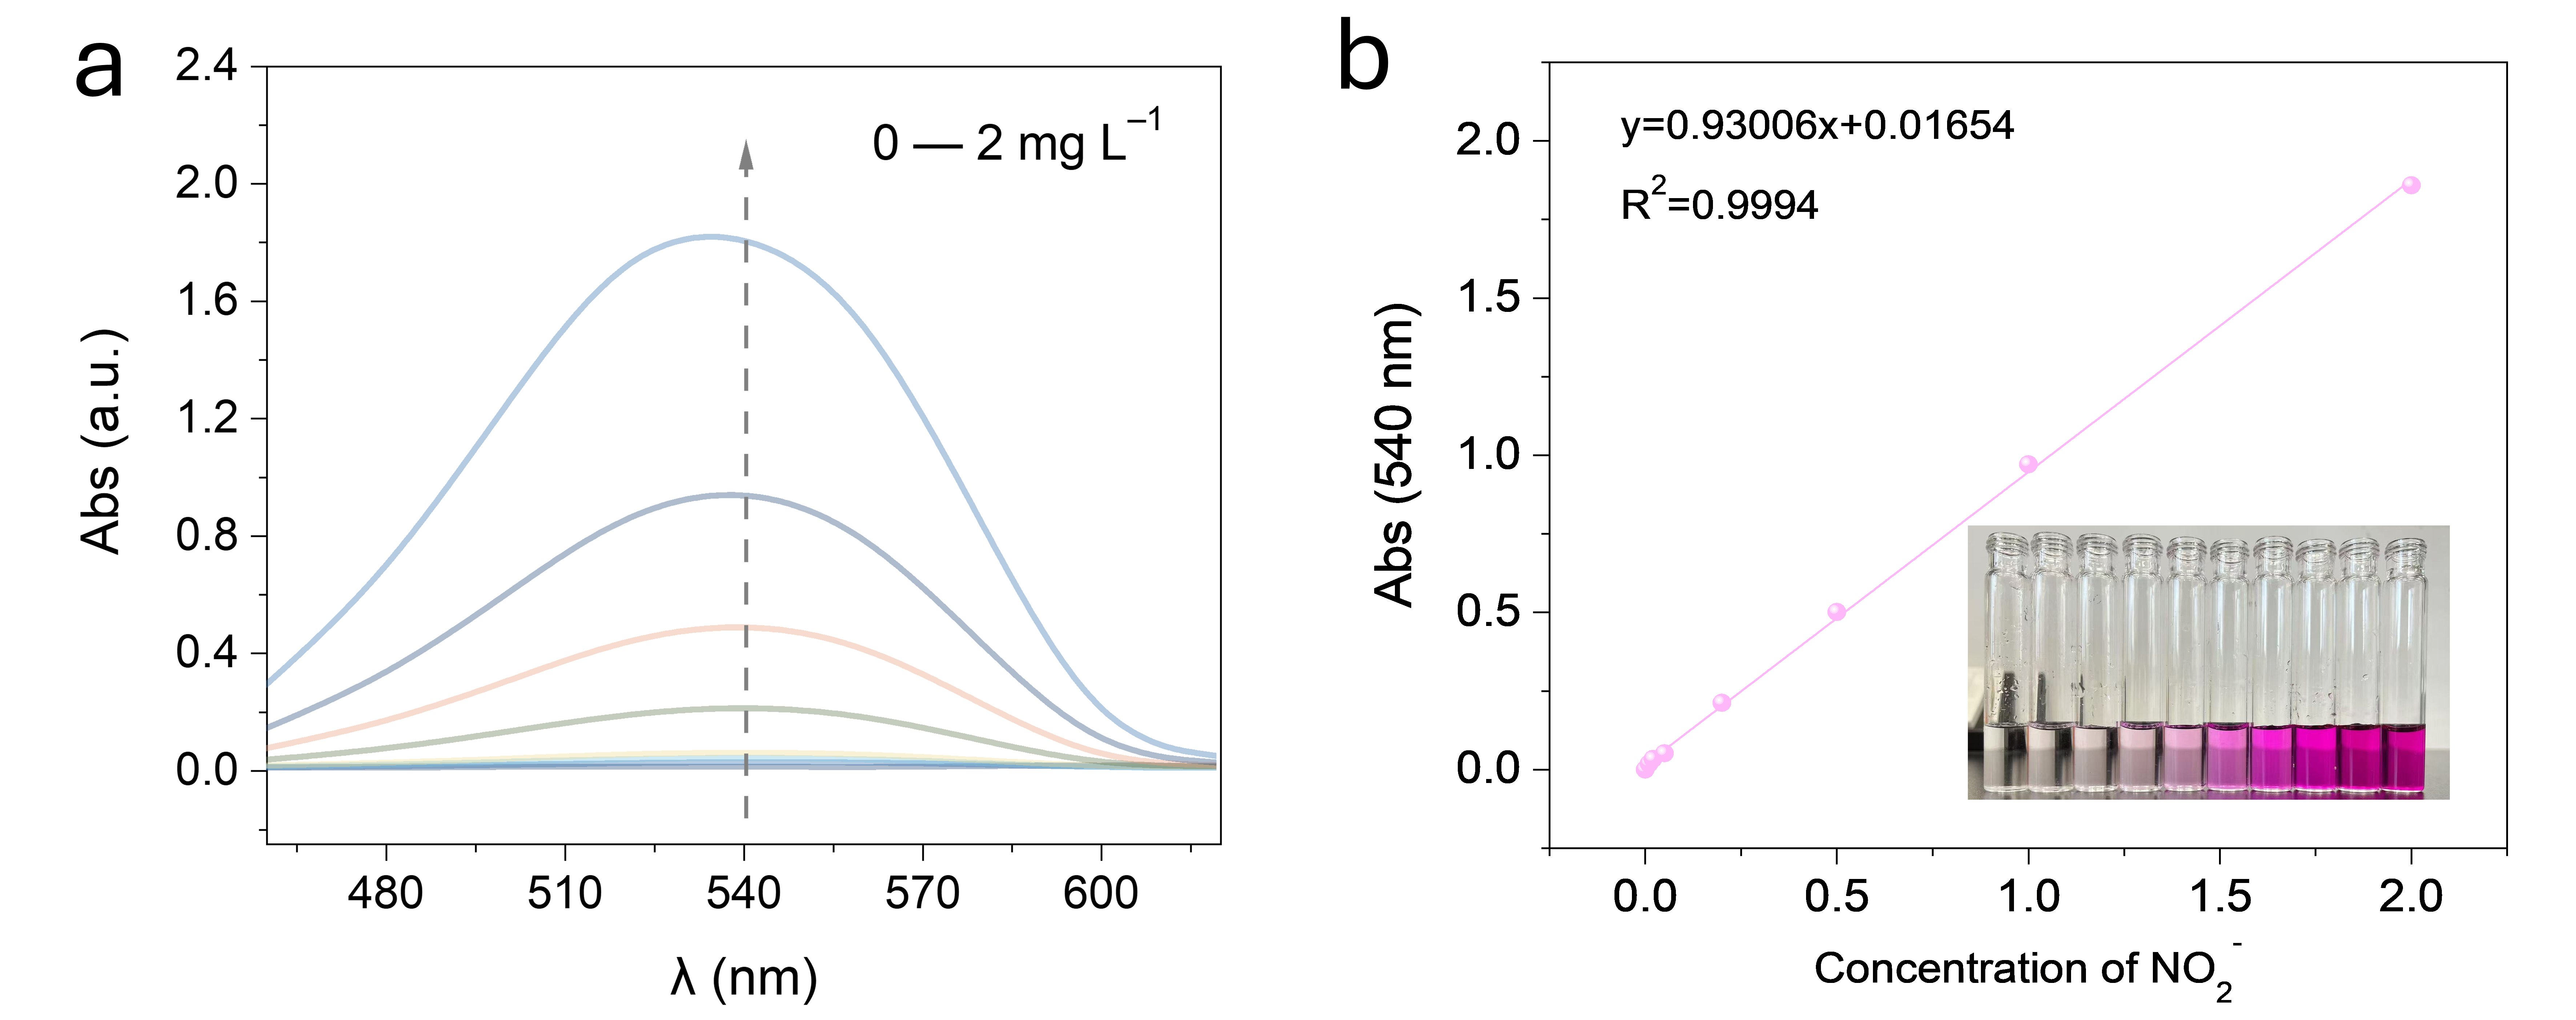


**Supplementary Fig. 31.** Calibration of the Saltzman colorimetric method for nitrite (NO2–) quantification: (a) UV-vis absorption spectra of NO2– standard solutions with gradient concentrations, (b) linear calibration curve (detection wavelength 540 nm).

**Determination of N2 and H2:** Gaseous products generated during urea synthesis were quantified via gas chromatography (GC, Agilent 7890A) equipped with thermal conductivity detector (TCD) and flame ionization detector (FID). A HP-PLOT Q capillary column (30 m × 0.32 mm × 20 μm) was employed for component separation, with high-purity argon as the carrier gas at a constant flow rate of 1.0 mL min–1. The column temperature program was set as follows: held at 40 °C for 2 min, ramped to 180 °C at 10 °C min–1, and maintained for 5 min. Injector and detector temperatures were fixed at 200 °C and 250 °C, respectively.


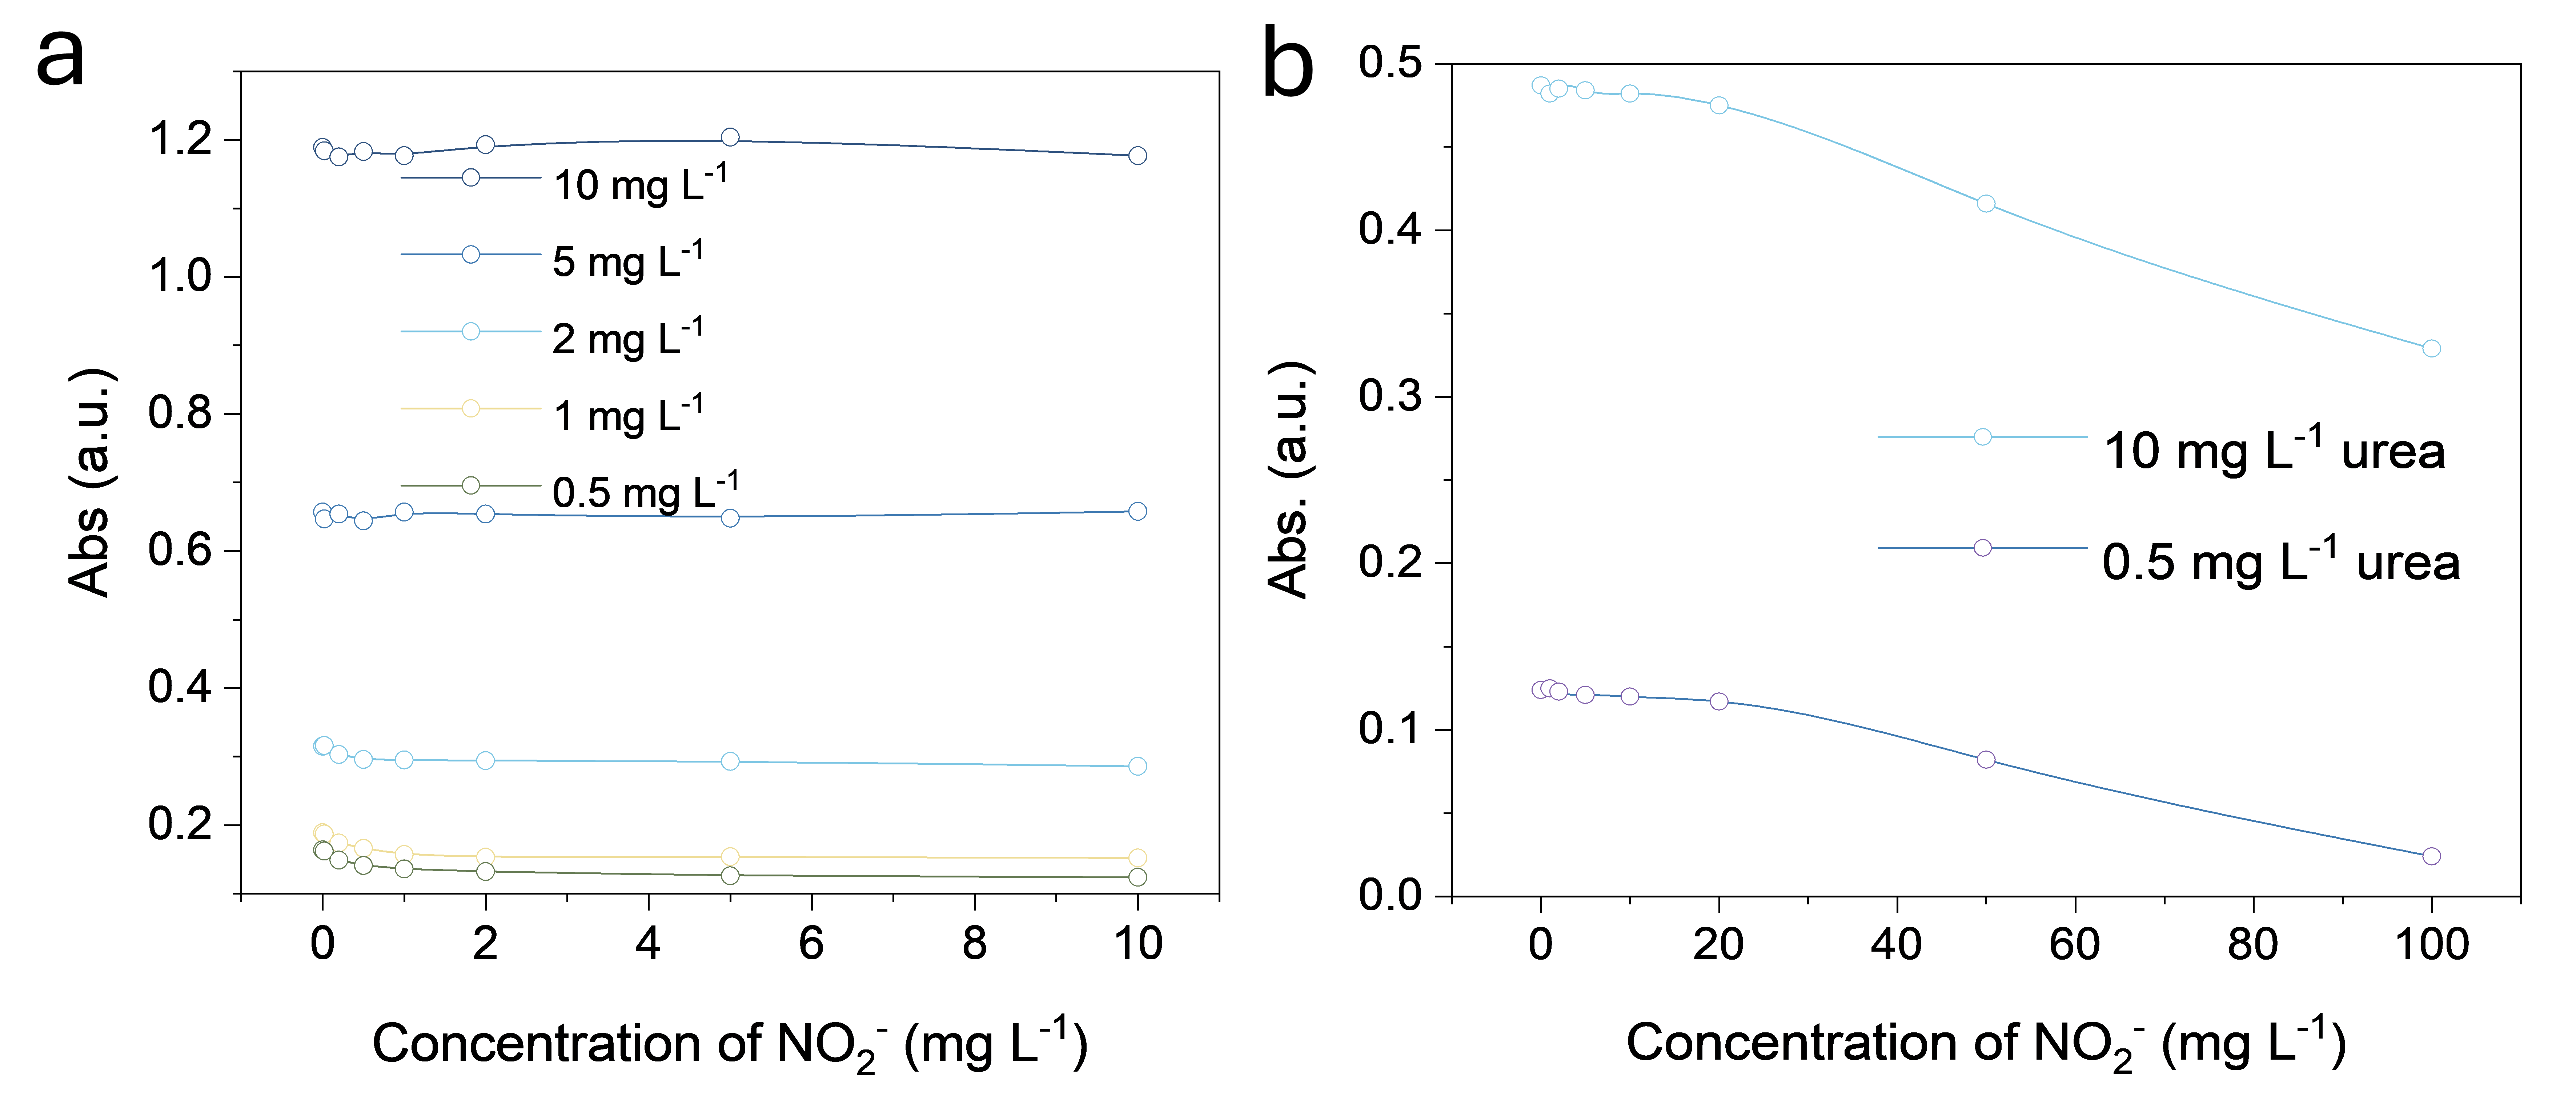


**Supplementary Fig. 32.** Anti-interference validation of the urea colorimetric quantification method: effect of co-existing NO2– on the absorbance of urea at 525 nm. (a) NO2– concentration range 0–10 mg L–1, (b) NO2– concentration range 0–100 mg L–1.

**Anti-interference validation of urea colorimetric quantification** was performed via controlled experiments, to evaluate the interference of nitrite (NO2–, the primary NO3RR intermediate) on urea quantification via the diacetyl monoxime-thiosemicarbazide method, and verify the accuracy and reliability of the quantitative protocol. NO2– interference was tested at concentrations of 0–10 mg L–1 (covering the full range detected in post-electrolysis electrolytes, maximum Faradaic efficiency <2%) and 100 mg L–1 (100 times the actual detected level, Supplementary Fig. 32). At NO2– concentrations below 10 mg L–1, the absorbance deviation of urea at 525 nm was less than 1.2% with no significant change in peak shape or position. Even at 100 mg L–1 NO2–, the absorbance deviation remained below 4.5%, with the linear relationship between urea concentration and absorbance well maintained (R2 > 0.999). No characteristic absorption peak of NO2– was observed at 525 nm, indicating no reaction between NO2– and the chromogenic reagent or interfering by-products. These results confirm that NO2– exerts negligible interference on urea quantification in the actual electrolysis system, ensuring the accuracy of the reported urea yield and Faradaic efficiency data.

**Section 3.4. Electrocatalytic performance**

The yield rate of urea and byproducts (NH4+, NO2–, H2, CO, NO, etc.) was calculated according following formula:

where and are the yield of urea and NH3, g gcat−1 h−1; and are the measured concentration of urea and byproducts, g L−1; is the volume of the cathode electrolyte, L; is the electrolysis time, h; is the mass of catalyst, g.

The Faradaic efficiency (FE) quantified the efficiency of an electrochemical reaction by comparing the actual charge utilized for product formation to the total charge passed through the system. The FE of urea and byproducts was calculated using the following equations23:

where is the electron transfer number, *F* is the Faradaic constant (96,485 C mol–1), and are the measured concentration of urea and byproducts, g L−1; is the volume of the cathode electrolyte, L; and are the relative molar mass, g mol−1; is the total charge flowing through the working electrode.

**Turnover frequency (TOF):** TOF is defined as the number of target urea molecules formed per active site per hour, representing the intrinsic activity of single-atom active sites. The calculation formula is given as:

where is the molar amount of synthesized urea, mol, is Avogadro’s constant, 6.022×1023 mol–1, is the molar amount of effective Cu–N4 active sites, and is the reaction time, h.

The TOF value of tZIF-Cu900 was calculated based on experimentally measured parameters in this work. The Cu mass fraction of tZIF-Cu900 was determined to be 0.22 wt% by ICP-OES, and AC HAADF-STEM characterization confirmed that Cu species were fully atomically dispersed without agglomeration, so the total molar amount of Cu was adopted as the molar amount of effective Cu–N4 active sites. The TOF value was calculated using the urea yield rate of 10.97 g gcat–1 h–1 obtained in the H-type cell at –0.7 V vs. RHE, with a final result of 5277 h–1.


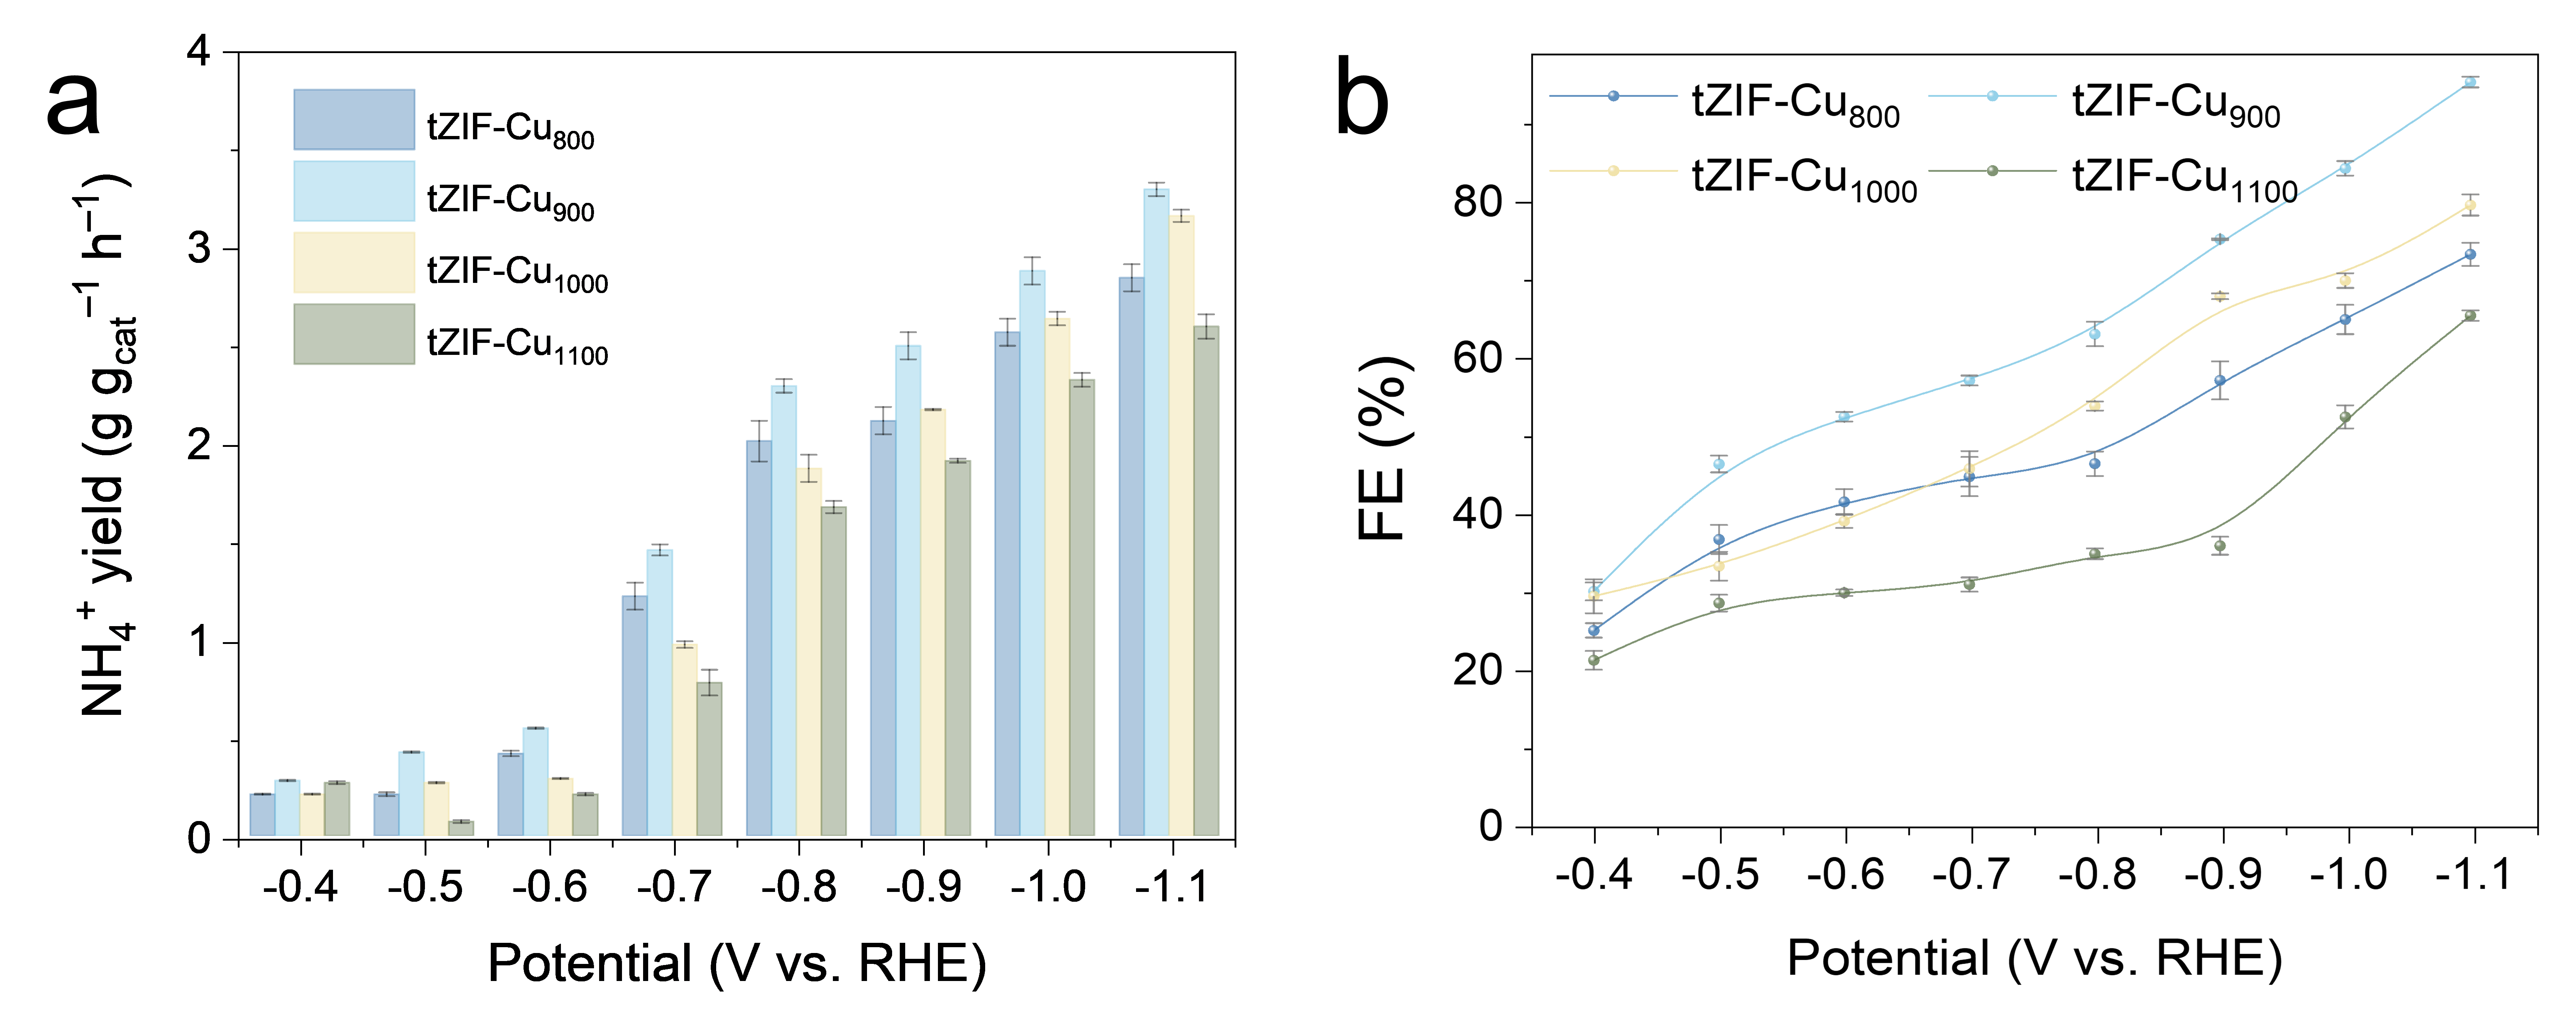


**Supplementary Fig. 33**. Potential-dependent (a) yield rate and (b) Faradaic efficiency (FE) of NH4+ byproduct over tZIF-Cu800, tZIF-Cu900, tZIF-Cu1000 and tZIF-Cu1100. All potentials are vs. RHE.

**Potential-dependent evolution of NH4⁺ formation over** tZIF-Cu900 was analyzed (Supplementary Fig. 33) during urea synthesis at –0.4 to –1.1 V vs. RHE. NH4⁺ yield and FE rise monotonically with increasingly negative potential, driven by the kinetically facile 8-electron NO3RR. In contrast, urea performance shows a volcano trend peaking at –0.7 V vs. RHE; excessive overpotential accelerates NH4+ generation and competitive HER, depleting key intermediates and inhibiting C–N coupling. This contrast confirms a narrow optimal potential window for urea synthesis, where suppressing deep NO3RR to NH4⁺ is critical for high selectivity.


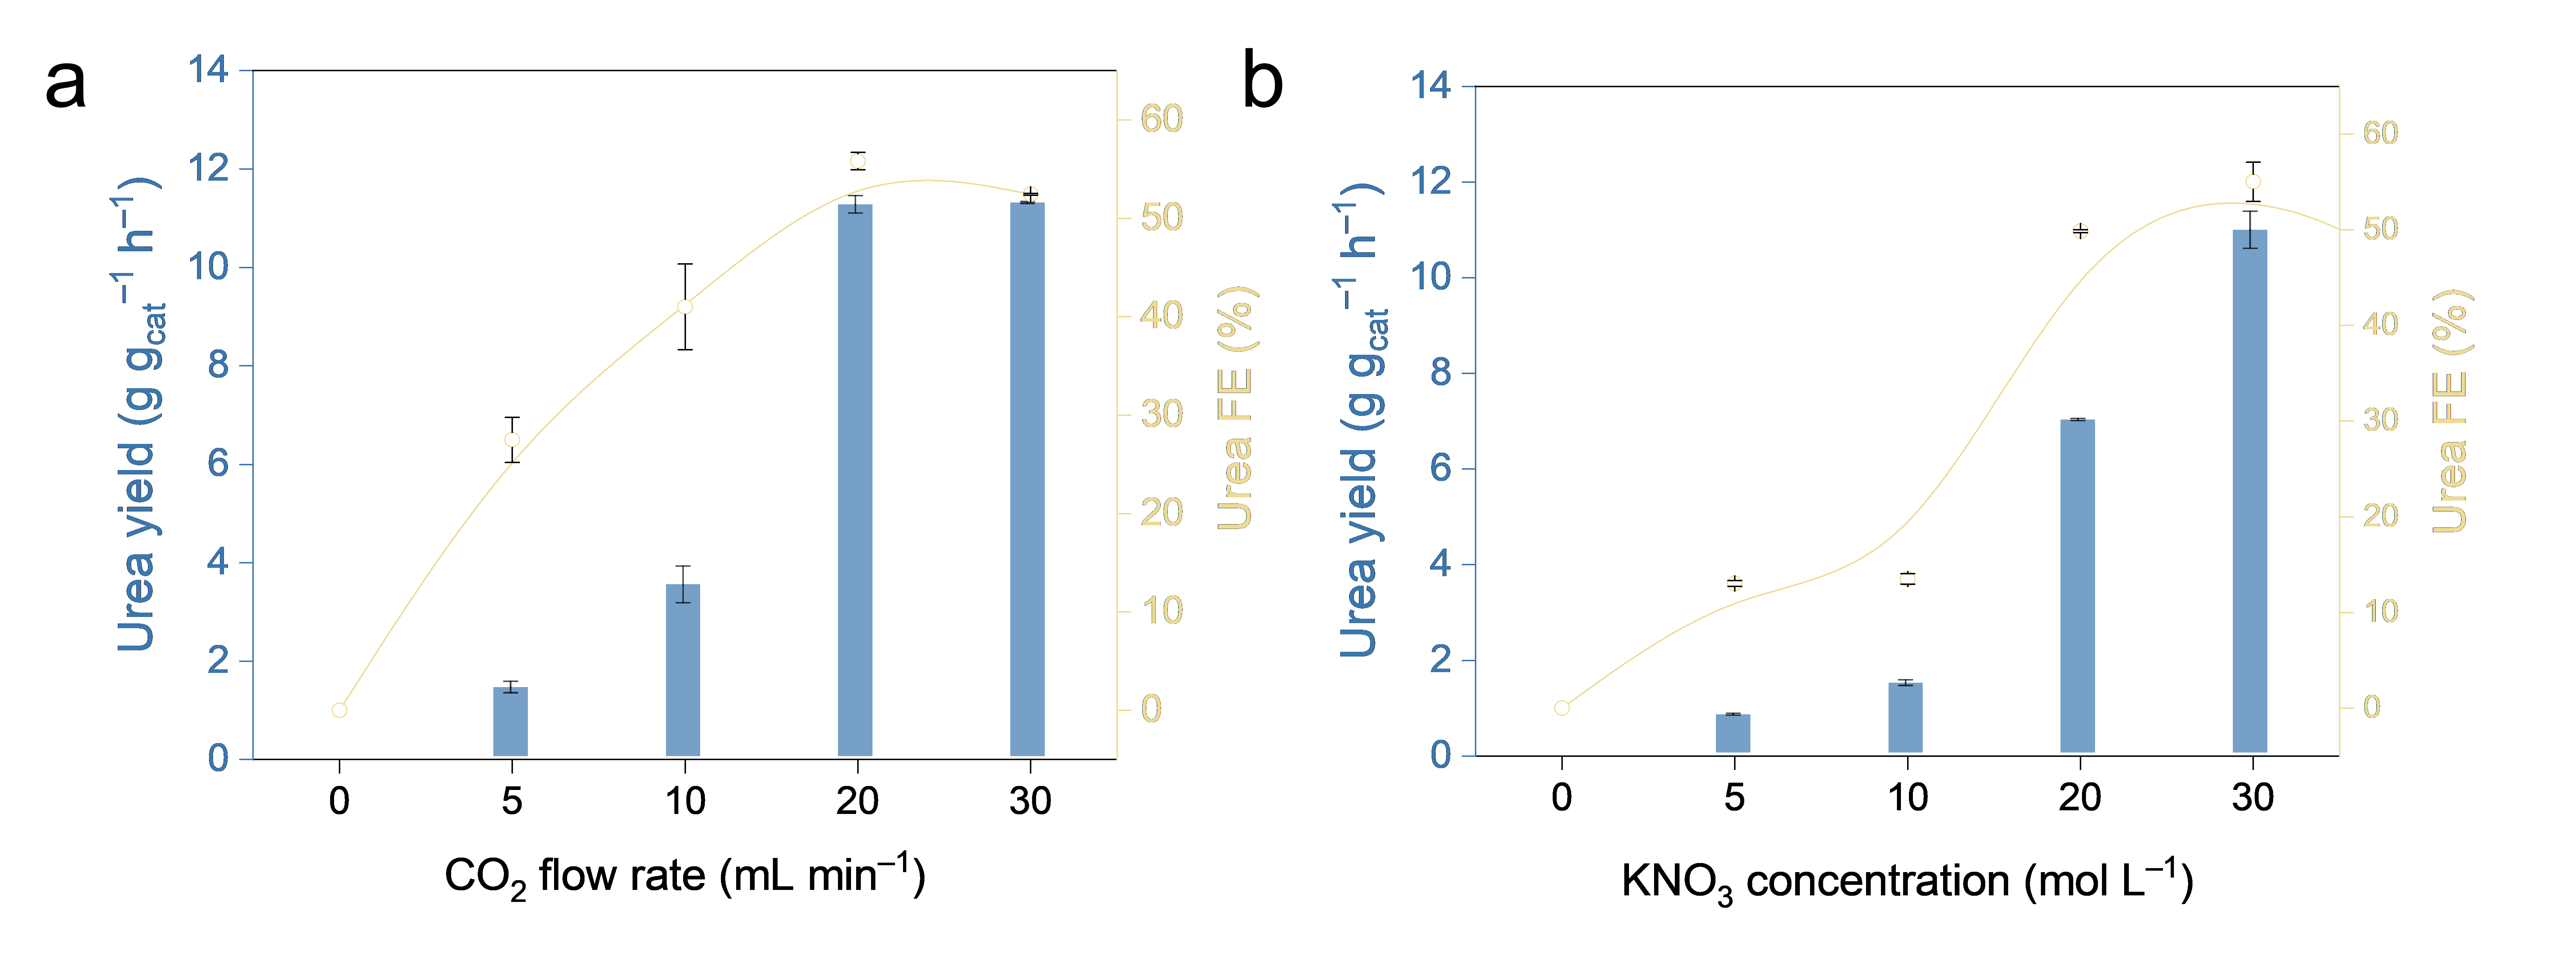


**Supplementary Fig 34.** Effect of (a) CO2 flow rate and (b) NO3⁻ concentration on the urea yield rate and Faradaic efficiency over tZIF-Cu900 at –0.7 V vs. RHE.

**Effects of reactant concentration on urea yield:** The effects of CO2 flow rate and NO3⁻ concentration on urea production over tZIF-Cu900 were studied at –0.7 V vs. RHE. Urea yield was linearly enhanced by ~6 times as NO3⁻ concentration increased from 0 to 30 mmol L–1, since the C–N coupling was limited by nitrogen intermediates. The nanoconfined cavities enriched NO3⁻ anions, and NO3⁻ reduction acted as the rate-limiting step for *NO generation. Urea yield quickly rose with CO2 flow from 0 to 30 mL min–1 but saturated at higher rates due to the low solubility of CO2 in water. The enrichment of neutral CO2 in cavities was far weaker than that of NO3⁻. These results verify the nitrogen-limited feature of urea electrosynthesis, consistent with the kinetic mismatch between NO3RR and CO2RR.


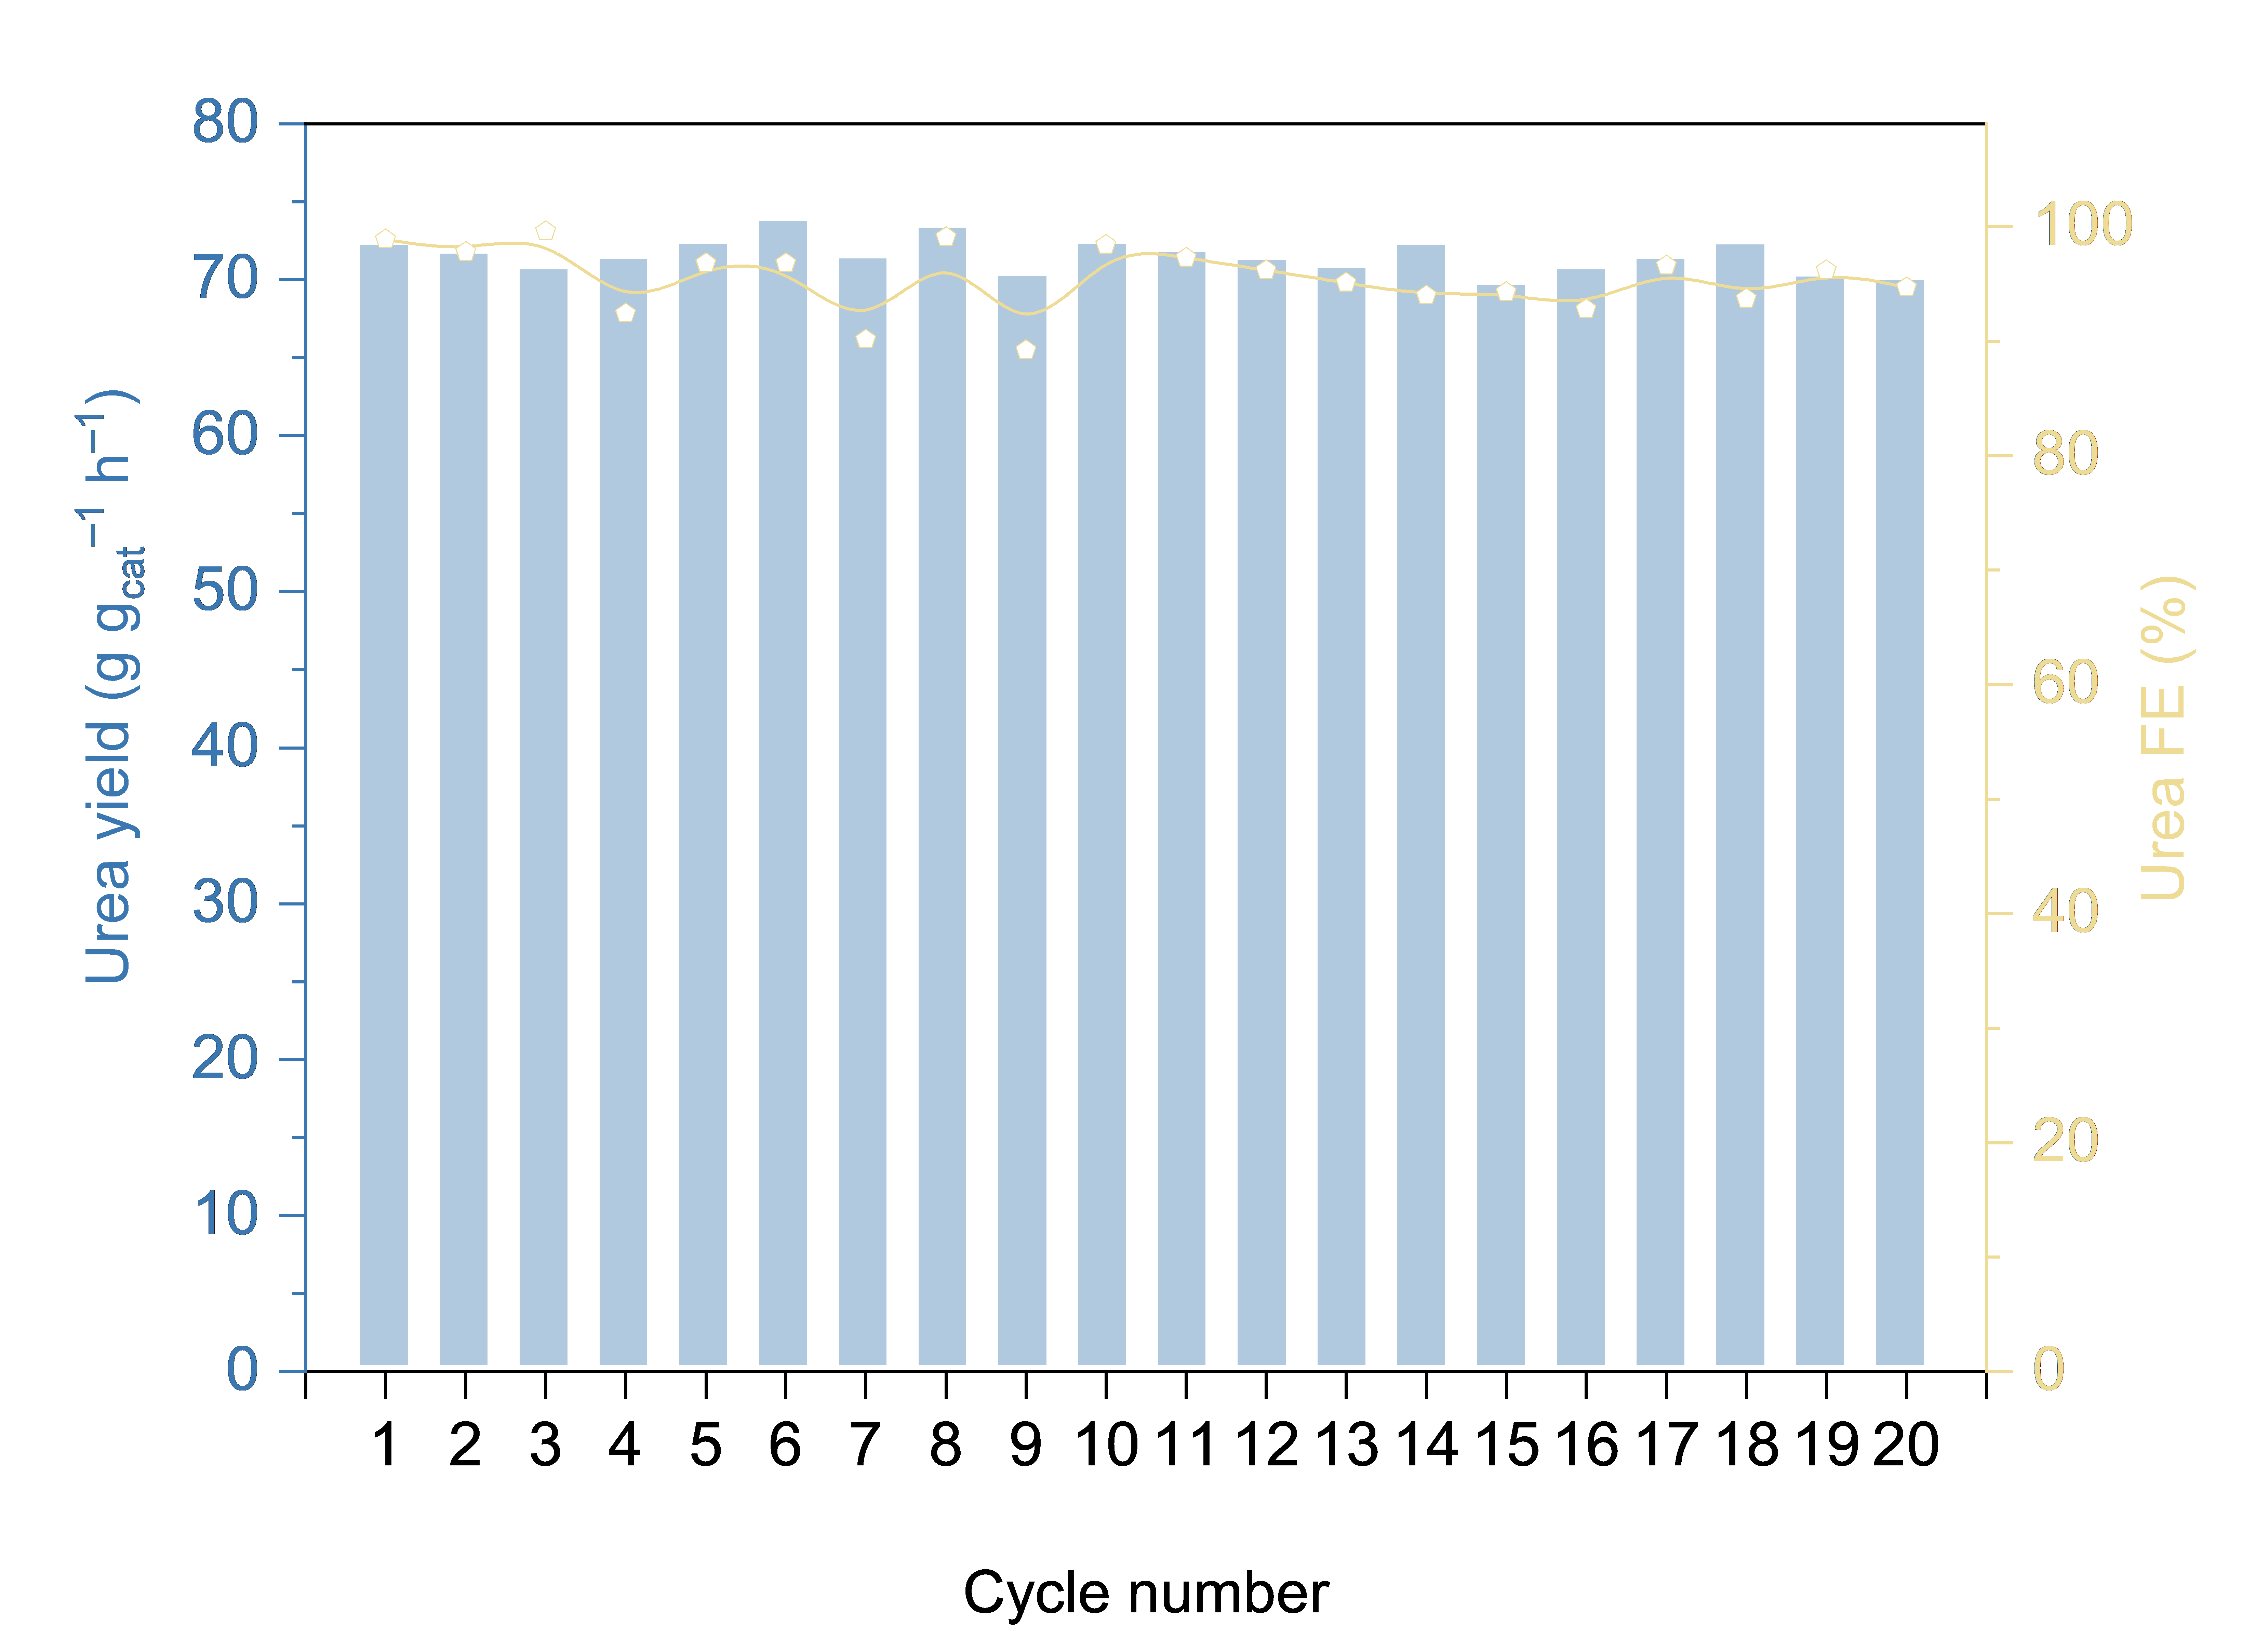


**Supplementary Fig. 35**. Cycling stability test of tZIF-Cu900 for urea electrosynthesis at –0.7 V vs. RHE (20 consecutive cycles).


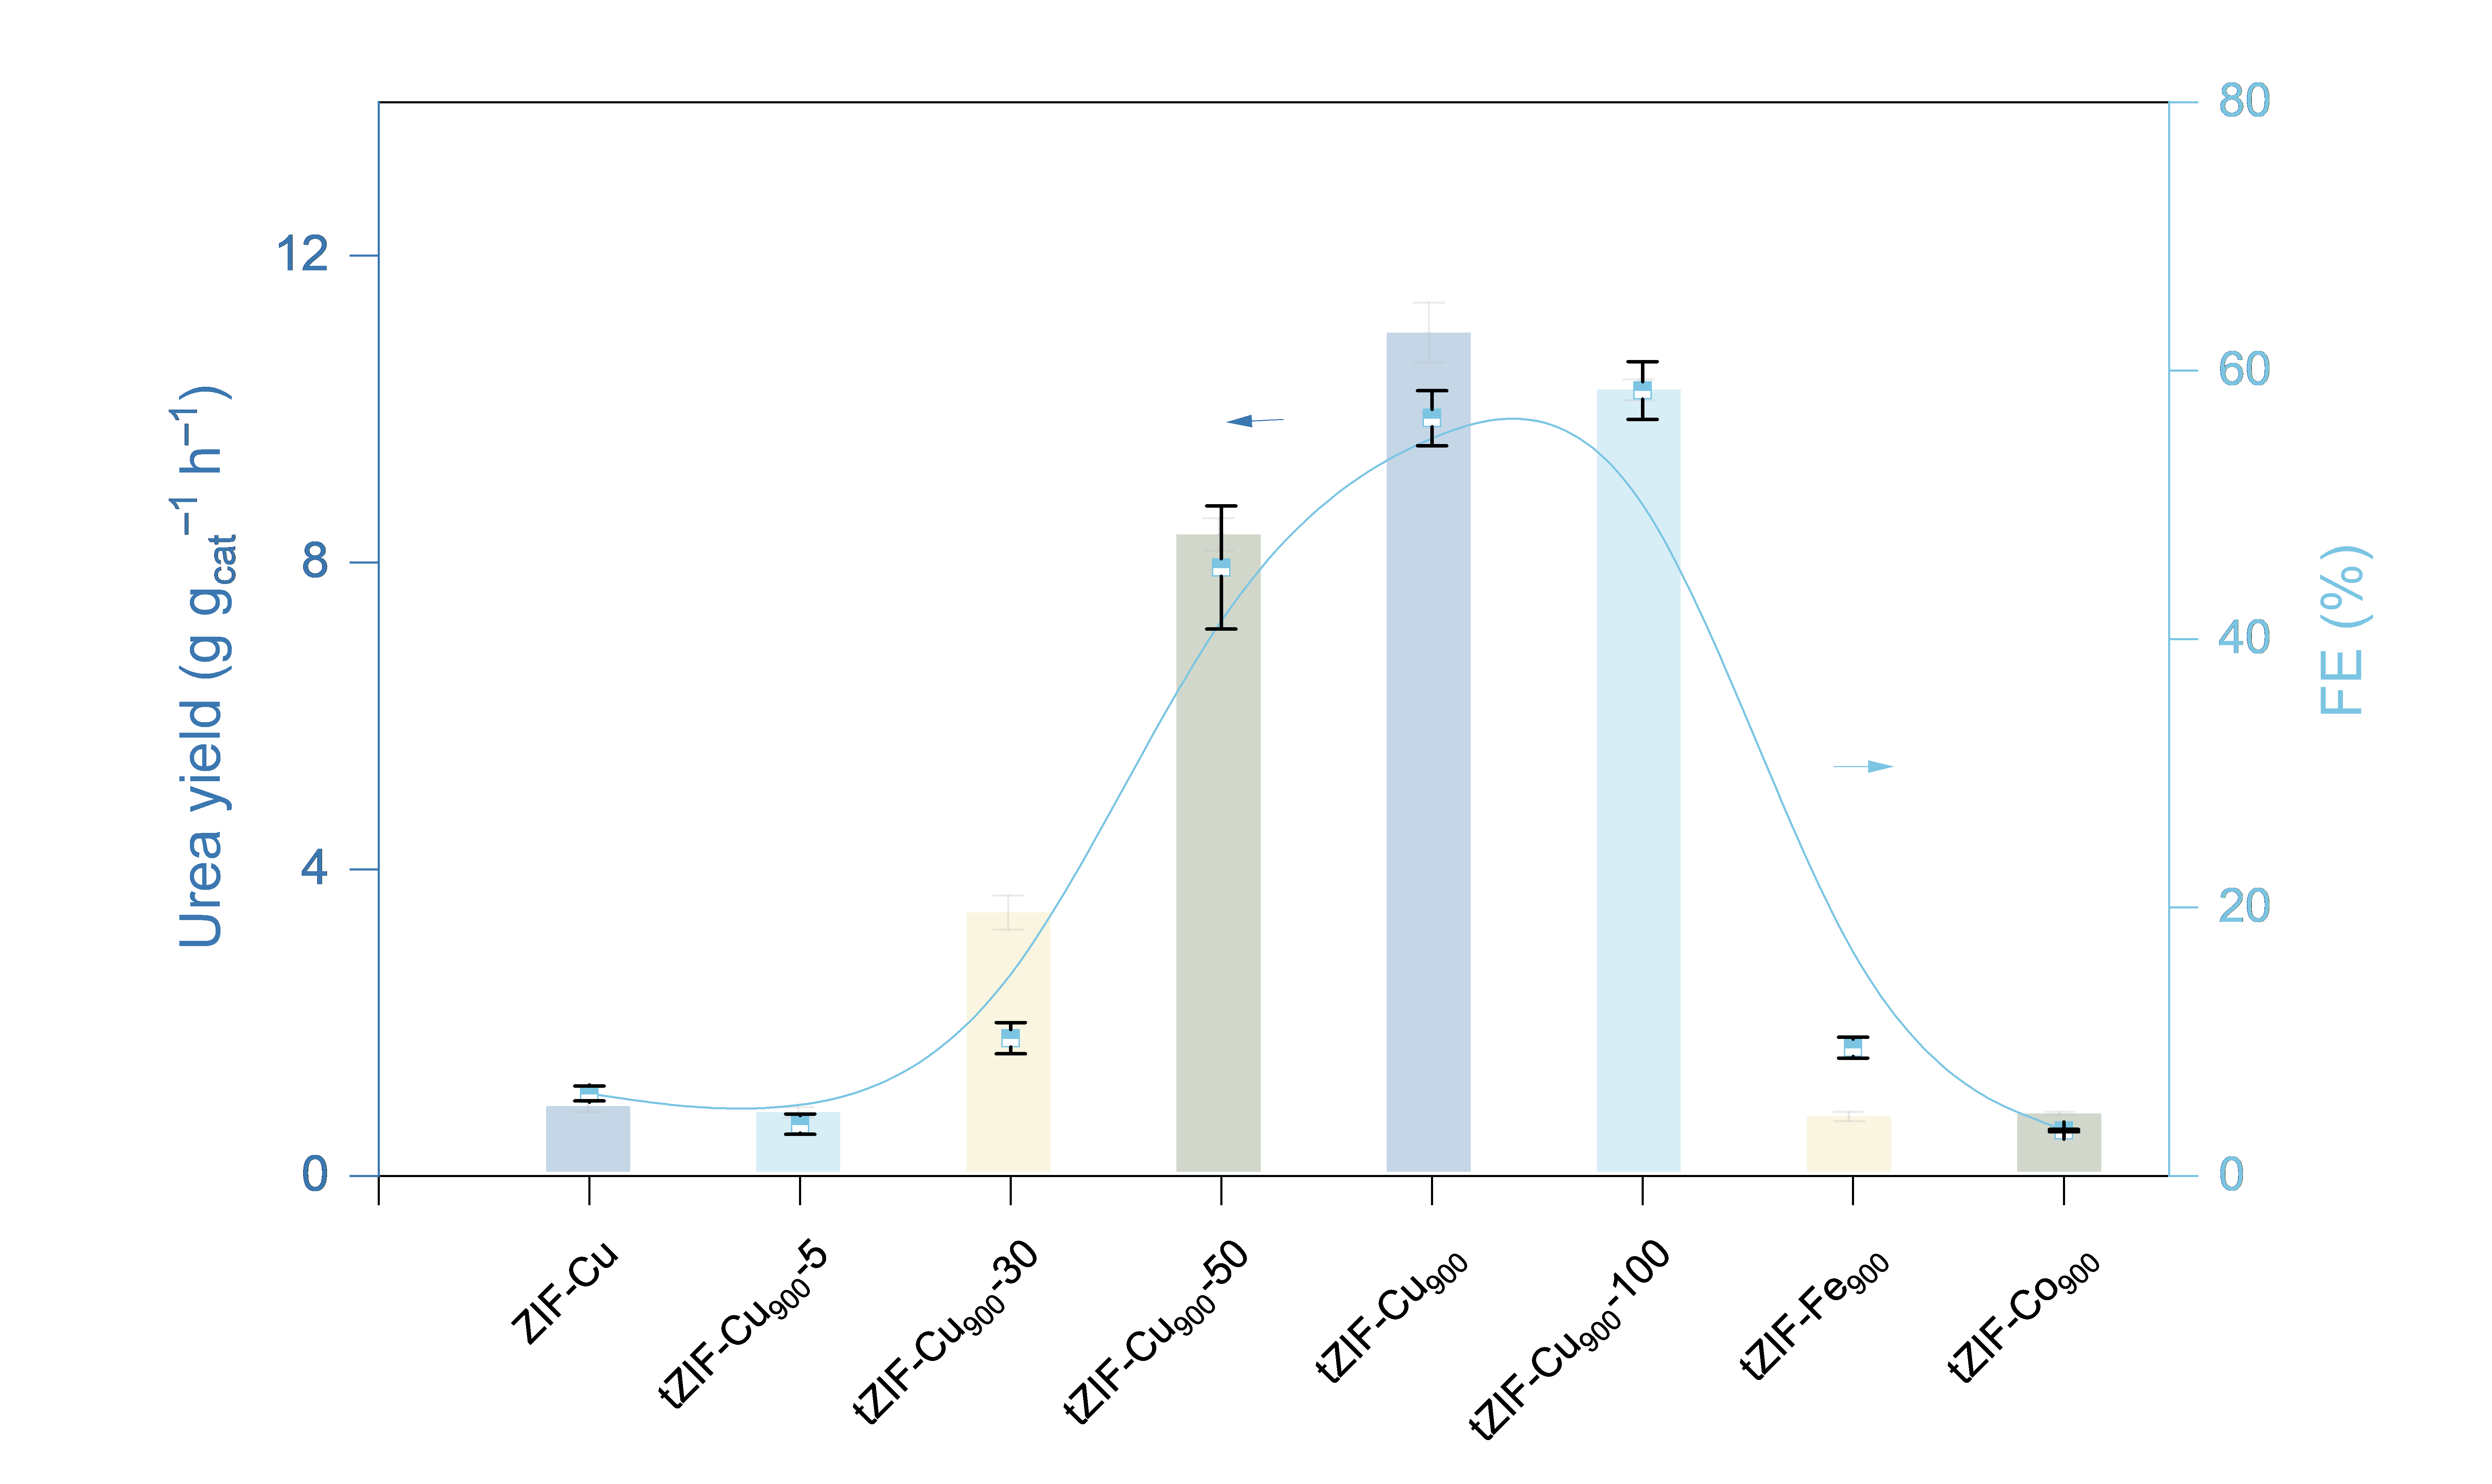


**Supplementary Fig. 36**. Urea yield rate of various control catalysts at –0.7 V vs. RHE in CO2-saturated 0.1 M KNO3 + 0.1 M KHCO3 electrolyte, including ZIF-Cu precursor, tZIF-Cu900 with gradient Cu loading, tZIF-Fe900 and tZIF-Co900.

**Comparative Analysis of** tZIF-Cu900 **with Control Catalysts:** The unpyrolyzed ZIF-Cu precursor delivered a urea yield rate of 0.19 g gcat–1 h–1 and a FE of 6.14%, owing to the absence of well-defined nanoconfined cavities, graphitic conductive frameworks and fully constructed Cu–N4 sites, which restricted active site exposure and failed to realize intermediate enrichment or side reaction suppression. For tZIF-Cu900 catalysts with gradient Cu loadings (5, 30, 50, 80 and 100 mg of copper nitrate trihydrate, labeled as tZIF-Cu900-5/30/50/80/100), catalytic performance follows a distinct volcanic trend. tZIF-Cu900-5 shows negligible activity; tZIF-Cu900-30 exhibits a yield rate of 0.78 g gcat–1 h–1 with 3.86% FE; tZIF-Cu900-50 reaches 8.34 g gcat–1 h–1 and 45.33% FE; the optimal tZIF-Cu900-80 achieved 10.97 g gcat–1 h–1 and 56.45% FE; and tZIF-Cu900-100 shows a slight decline to 10.23 g gcat–1 h–1 and 58.51% FE. Low Cu loadings limited the density of accessible Cu–N4 active sites, while excessive Cu doping induced atomic agglomeration into inactive nanoclusters and disrupted the ordered nanoconfined cavity structure, attenuating intermediate enrichment and side reaction inhibition.

Catalysts with alternative metal sites (tZIF-Fe900 and tZIF-Co900) synthesized via identical thermal sculpting showed drastically inferior performance, with yield rates of 0.725 and 0.76 g gcat–1 h–1 and FEs of 9.56% and 3.38%, respectively. The d-band centers of Fe–N₄ and Co–N₄ sites are closer to the Fermi level than Cu–N4, triggering intensive hydrogen evolution via over-strong *H adsorption and over-stabilizing *CO/*NO intermediates. This impedes bimolecular C–N coupling and favors deep reduction to NH4+ and carbonaceous byproducts, rendering Fe/Co-based catalysts incapable of efficient and selective urea electrosynthesis even with identical nanoconfinement.

Compared with state-of-the-art catalysts reported in literature, the optimal tZIF-Cu900 in this work achieved a urea yield rate of 71.32 g gcat–1 h–1 and 98.9% FE in gas diffusion electrode cells, representing the best synergistic performance of ultrahigh yield and near-unity selectivity to date. It also features balanced reaction current density, exceptional long-term stability over 300 h in pilot-scale operation, and exclusive selectivity toward urea, outperforming all previously reported electrocatalysts for urea electrosynthesis.

**Supplementary Table 1.** Summary of recent studies on electrosynthesis of urea from CO2 and NO3–.

| Catalyst | FE (%) | Operating potential (vs. RHE) | Yield rate g gcat–1 h–1 | Stability (h) | Ref. |
| --- | --- | --- | --- | --- | --- |
| tZIF-Cu900 | 98.9 | –0.7 | 71.32 | 300 | This work |
| PCOF-34-Fe | 51.3 | –0.6 | 8.14 | 100 | 19 |
| Cu | 10 | –0.75 | N.A. | N.A. | 24 |
| Zn | 35 | –1.75 | N.A. | N.A. | 25 |
| Ni-Pc | 40 | –1.5 | N.A. | N.A. | 26 |
| In(OH)3-S | 53.4 | –0.6 | 0.53 | 12 | 27 |
| Vo-InOOH | 51 | –0.5 | 0.59 | 24 | 28 |
| Cu-GS-800 | 28 | –0.9 | 1.82 | 12 | 29 |
| BIF-29(Cu) | 68.5 | –0.3 | N.A. | N.A. | 30 |
| CuWO4 | 70.1 | –0.2 | 0.1 | 10 | 31 |
| CuO50ZnO50 | 41 | –0.8 | 12.78 | N.A. | 32 |
| (MOF) Cu-HATNA | 25 | –0.6 | 1.46 | N.A. | 33 |
| 3D Zn/Cu hybridcatalyst | 63 | –0.8 | 3.57 | N.A. | 34 |
| Cu-SP-OMe | 57.9 | –0.49 | 3.64 | N.A. | 35 |
| Mo-PCN-222(Co) | 33.9 | –0.4 | 0.84 | N.A. | 36 |
| CuInS2 | 19.6 | –0.8 | 2.99 | N.A. | 37 |
| VB12-CNTs/CP | 26.04 | –0.5 | 0.16 | 50 | 38 |
| B-FeNi-DASC | 17.8 | –1.5 | 1.21 | N.A. | 39 |
| Vo-S-IO-6 | 60.6 | –0.6 | 0.91 | N.A. | 40 |
| In-TiO2 | 9.06 | –0.65 | 0.76 | N.A. | 41 |
| Cu1CeO2 | 5.29 | –1.6 | 3.17 | N.A. | 42 |
| Fe@C-Fe3O4/CNTs | 16.5 | –0.65 | 1.34 | 10 | 43 |
| Cu-Cu2O | 17.7 | –1.5 | 3.74 | N.A. | 44 |
| IL@Cu-ZIF-8 | 55.3 | –0.5 | 42 | N.A. | 45 |
| Pd2Au1RuO2 | 75.6 | N.A. | 4.45 | 160 | 46 |
| Co NPs@C | 54.3 | N.A. | 2.21 | N.A. | 31 |
| Pd4Cu1FeNi(OH)2 | 66.5 | N.A. | 26.24 | 1000 | 47 |
| CuPd1Rh1-DAA | 72.1 | N.A. | 3.22 | 100 | 48 |

**Section 4. Uncovering catalytic mechanisms**

**Section 4.1. Geometrical confined effect calculation**

Molecular dynamics (MD) simulations were performed using the Large-scale Atomic/Molecular Massively Parallel Simulator (LAMMPS)49 to investigate the diffusion, confinement, and enrichment behavior of reaction-related species within nanoconfined cavities of different size.

A periodic cubic simulation box with dimensions of 50 Å × 50 Å × 70 Å was first constructed. The lower half of the box contained a pyridine structured nanotube doped with dispersed Cu–N4 sites, with inner diameters of 1.0 nm, 1.5 nm, 1.8 nm, and 2.6 nm, respectively, corresponding to the pore sizes measured by N2 adsorption-desorption. The nanotube length was set to 25 Å, with both ends open to allow molecular diffusion, and the tube axis aligned along the z-direction. A single-layer graphene sheet was placed at z = 30 Å to separate the upper and lower halves of the box, with a circular hole matching the nanotube inner diameter to ensure that small molecules and water could only enter the cavity through the opening, eliminating external diffusion interference. The upper half of the box was filled with 100 small reactant molecules (including CO2, CO, NO3⁻, or NO) and 2000 H2O molecules, corresponding to the actual electrolyte composition in the electrocatalytic system.

For the above composite cavity models with different diameters, LAMMPS software was first used for full-atom MD relaxation to verify the thermodynamic stability of the structure at 300 K, with the ReaxFF force field selected for the simulation, NVT ensemble, and a total simulation time of 10 ns with a time step of 1 fs. The stable structure obtained by MD relaxation was further used as the initial structure for subsequent DFT geometric optimization and electronic structure calculation.

All simulations were performed in the real unit system, with a timestep of 0.5 fs. The interatomic interactions were described by a hybrid force field: the modified embedded atom method (MEAM) potential was used for the Cu–N4 doped composite framework, and the Lennard-Jones (LJ) potential with a 10 Å cutoff was used for the intermolecular interactions between small molecules and water, with the Lorentz-Berthelot mixing rule applied for cross-species interactions. The SPC/E model was used for water molecules, with harmonic bond and angle potentials for intramolecular interactions.

During the simulation process, the mobile reactant molecules and water were subjected to a steepest descent minimization algorithm, with convergence criteria of 1.0 e–6 eV for energy and 1.0 e–8 eV Å–1 for force, to eliminate unreasonable atomic contacts and high-energy structural defects. The system was equilibrated in the NVT ensemble for 200000 timesteps at 300 K, with a Nose-Hoover thermostat to control the system temperature. A reflective wall was set at z = 30.5 Å and z = 68.0 Å to prevent water and small molecules from escaping the simulation box, ensuring a constant number of molecules in the system during equilibration. After equilibration, the reflective wall at z = 30.5 Å was removed, and a 2000000 timestep production run was performed in the NVT ensemble at 300 K. The trajectory of each molecule was recorded every 1000 timesteps, with the following key properties calculated in real time: the number of molecules inside the cavity, the mean square displacement (MSD) of target molecules, the kinetic energy and potential energy of each species, and the spatial distribution of molecules.


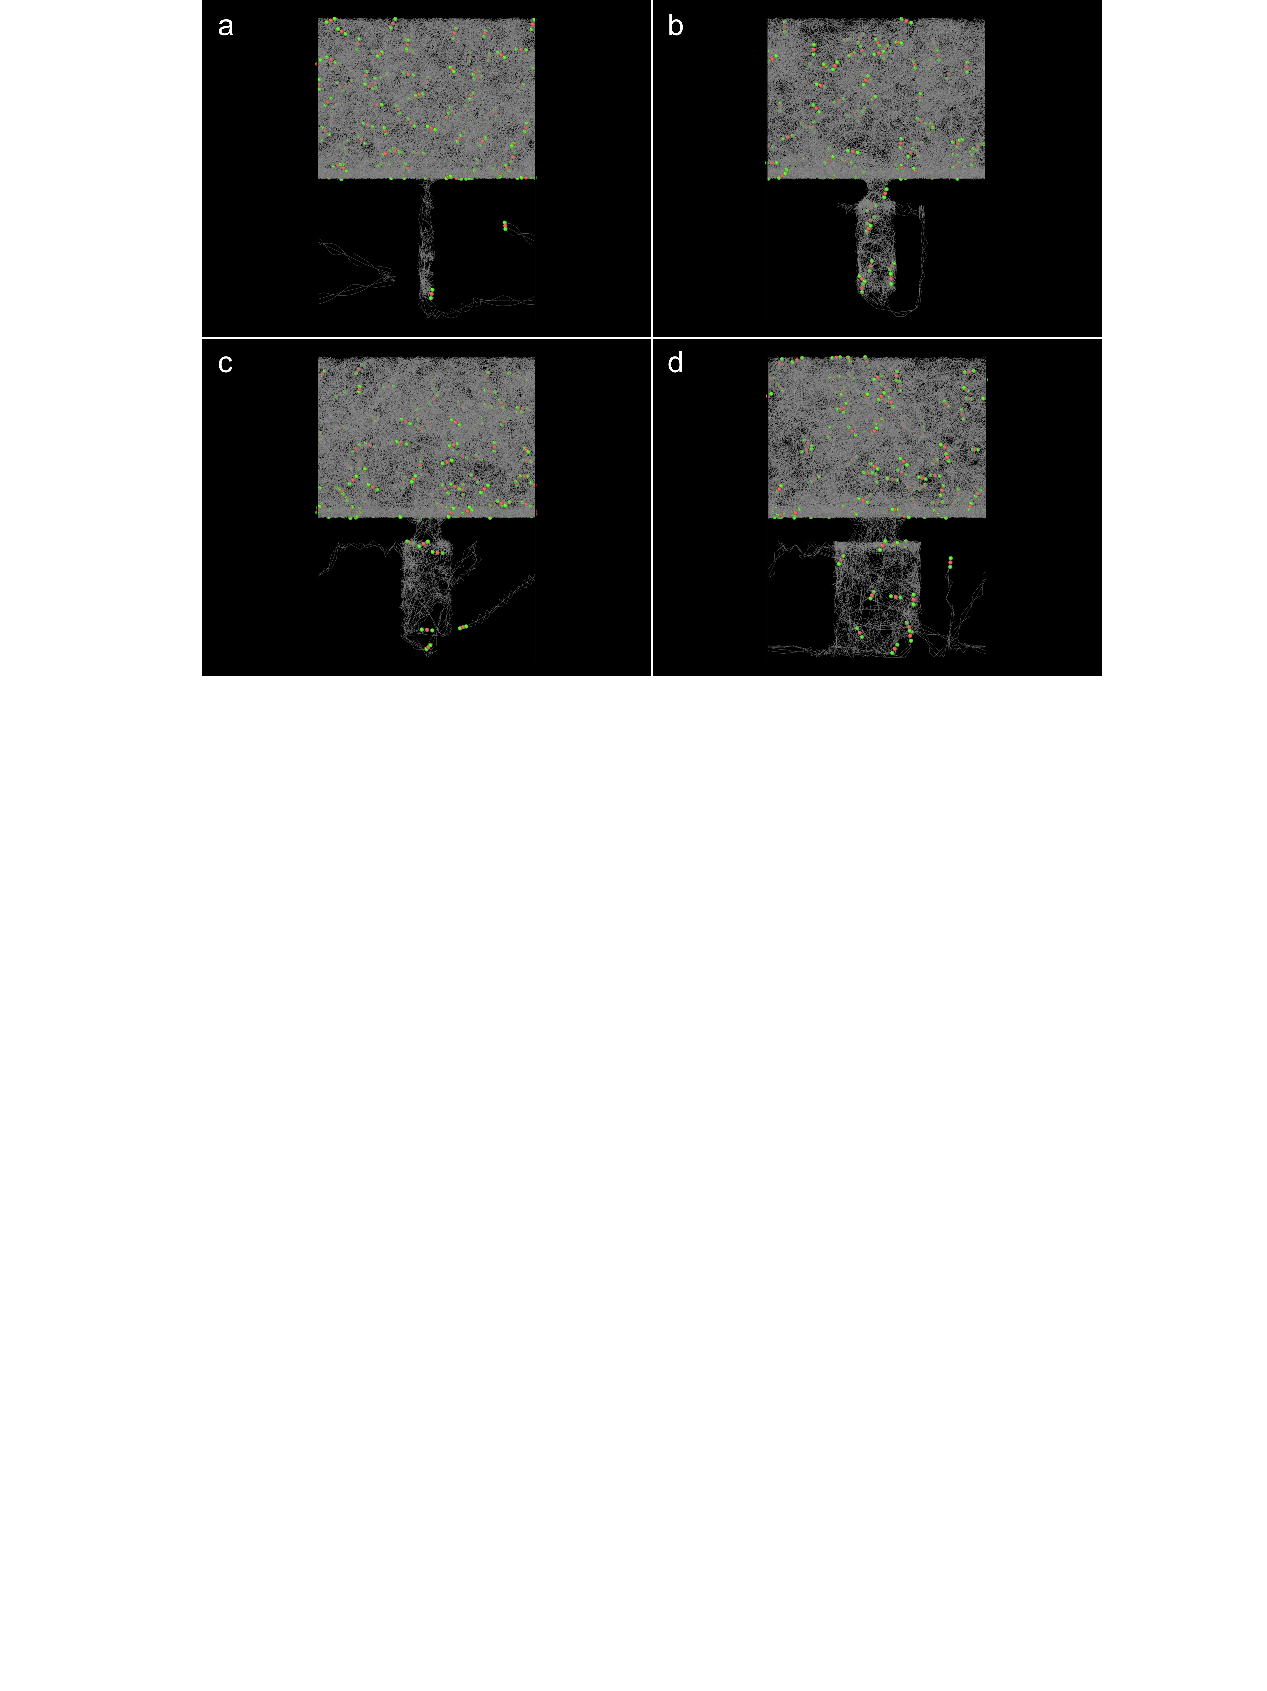


**Supplementary Fig. 37**. Molecular dynamics (MD) simulation trajectories of CO2 diffusion in nanocavities with diameters of 1.0 nm, 1.5 nm, 1.8 nm and 2.6 nm within 10000 fs (LAMMPS, ReaxFF force field, NVT ensemble, 300 K).


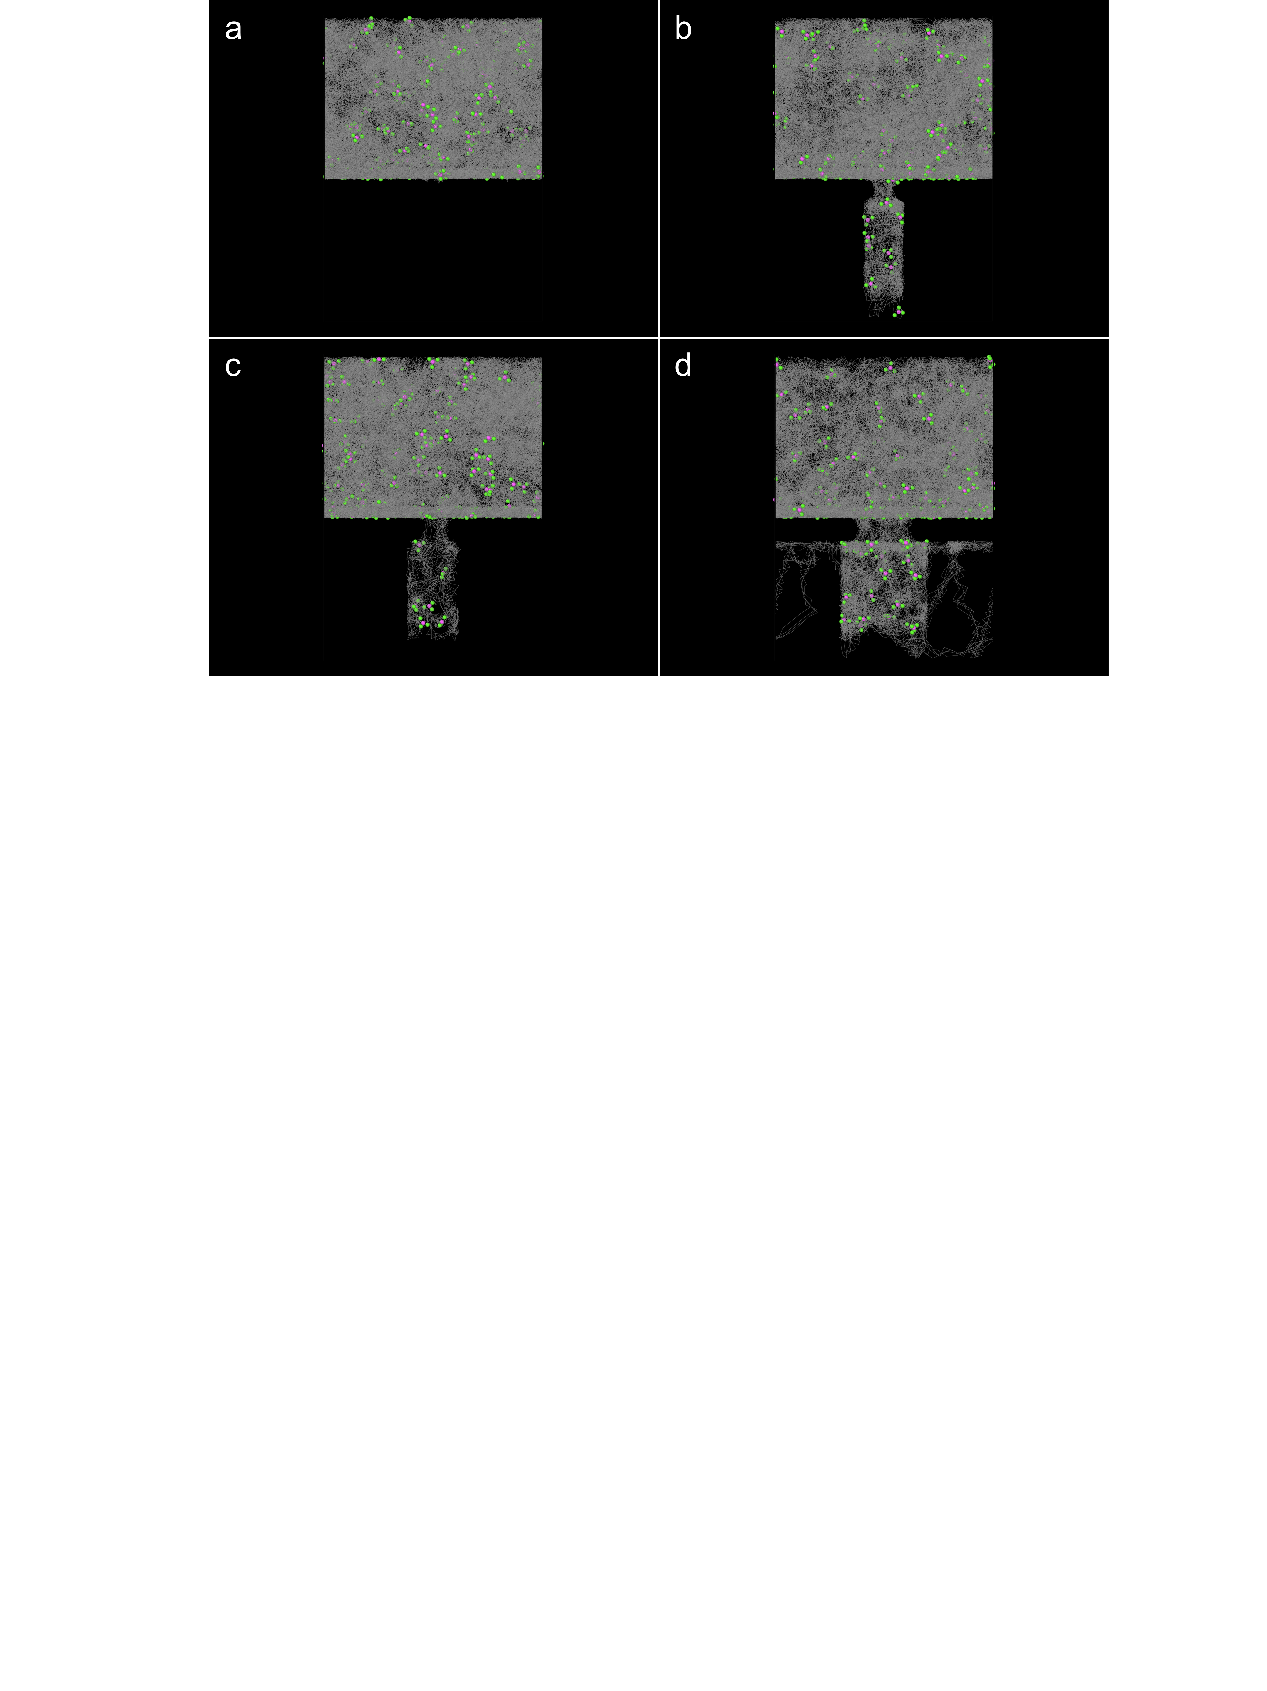


**Supplementary Fig. 38**. Molecular dynamics (MD) simulation trajectories of NO3– diffusion in nanocavities with diameters of 1.0 nm, 1.5 nm, 1.8 nm and 2.6 nm within 10000 fs (LAMMPS, ReaxFF force field, NVT ensemble, 300 K).


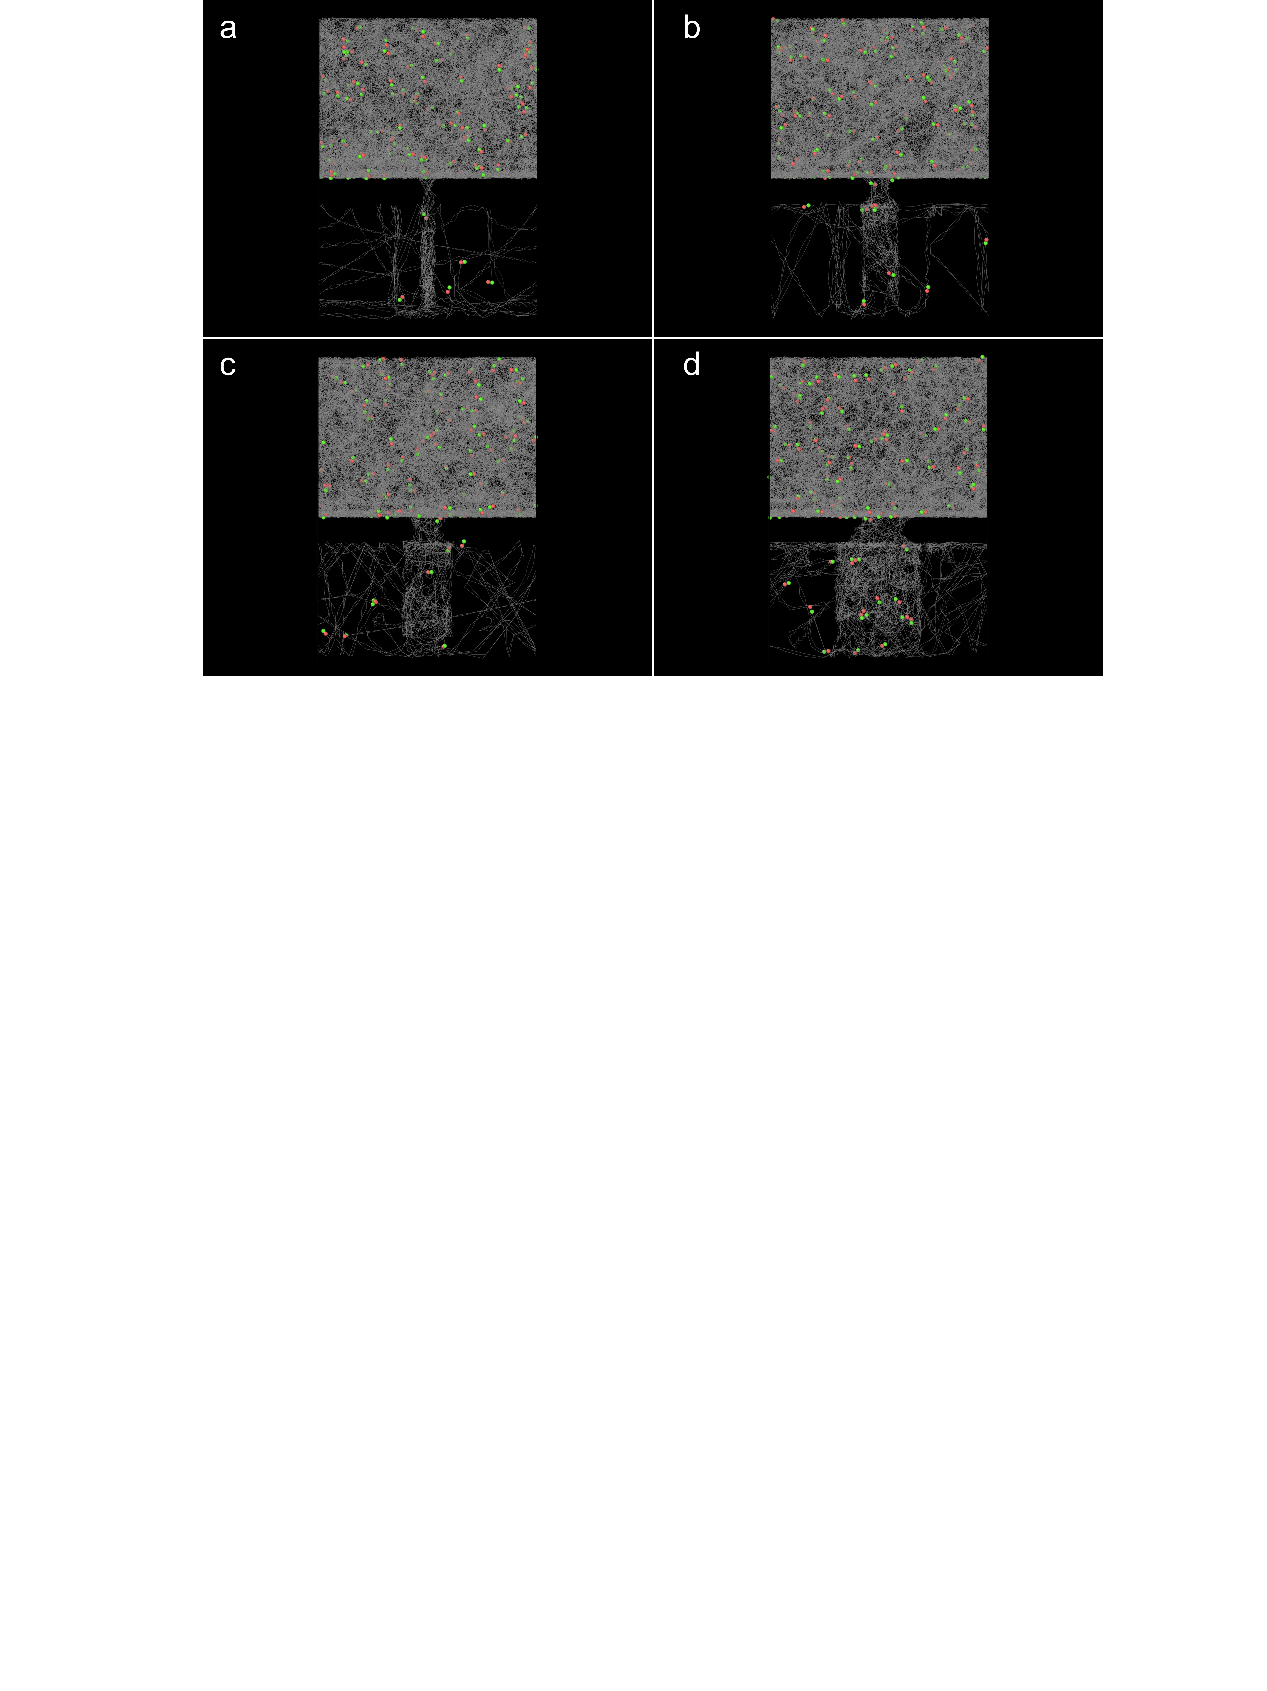


**Supplementary Fig. 39**. Molecular dynamics (MD) simulation trajectories of CO diffusion in nanocavities with diameters of 1.0 nm, 1.5 nm, 1.8 nm and 2.6 nm within 10000 fs (LAMMPS, ReaxFF force field, NVT ensemble, 300 K).


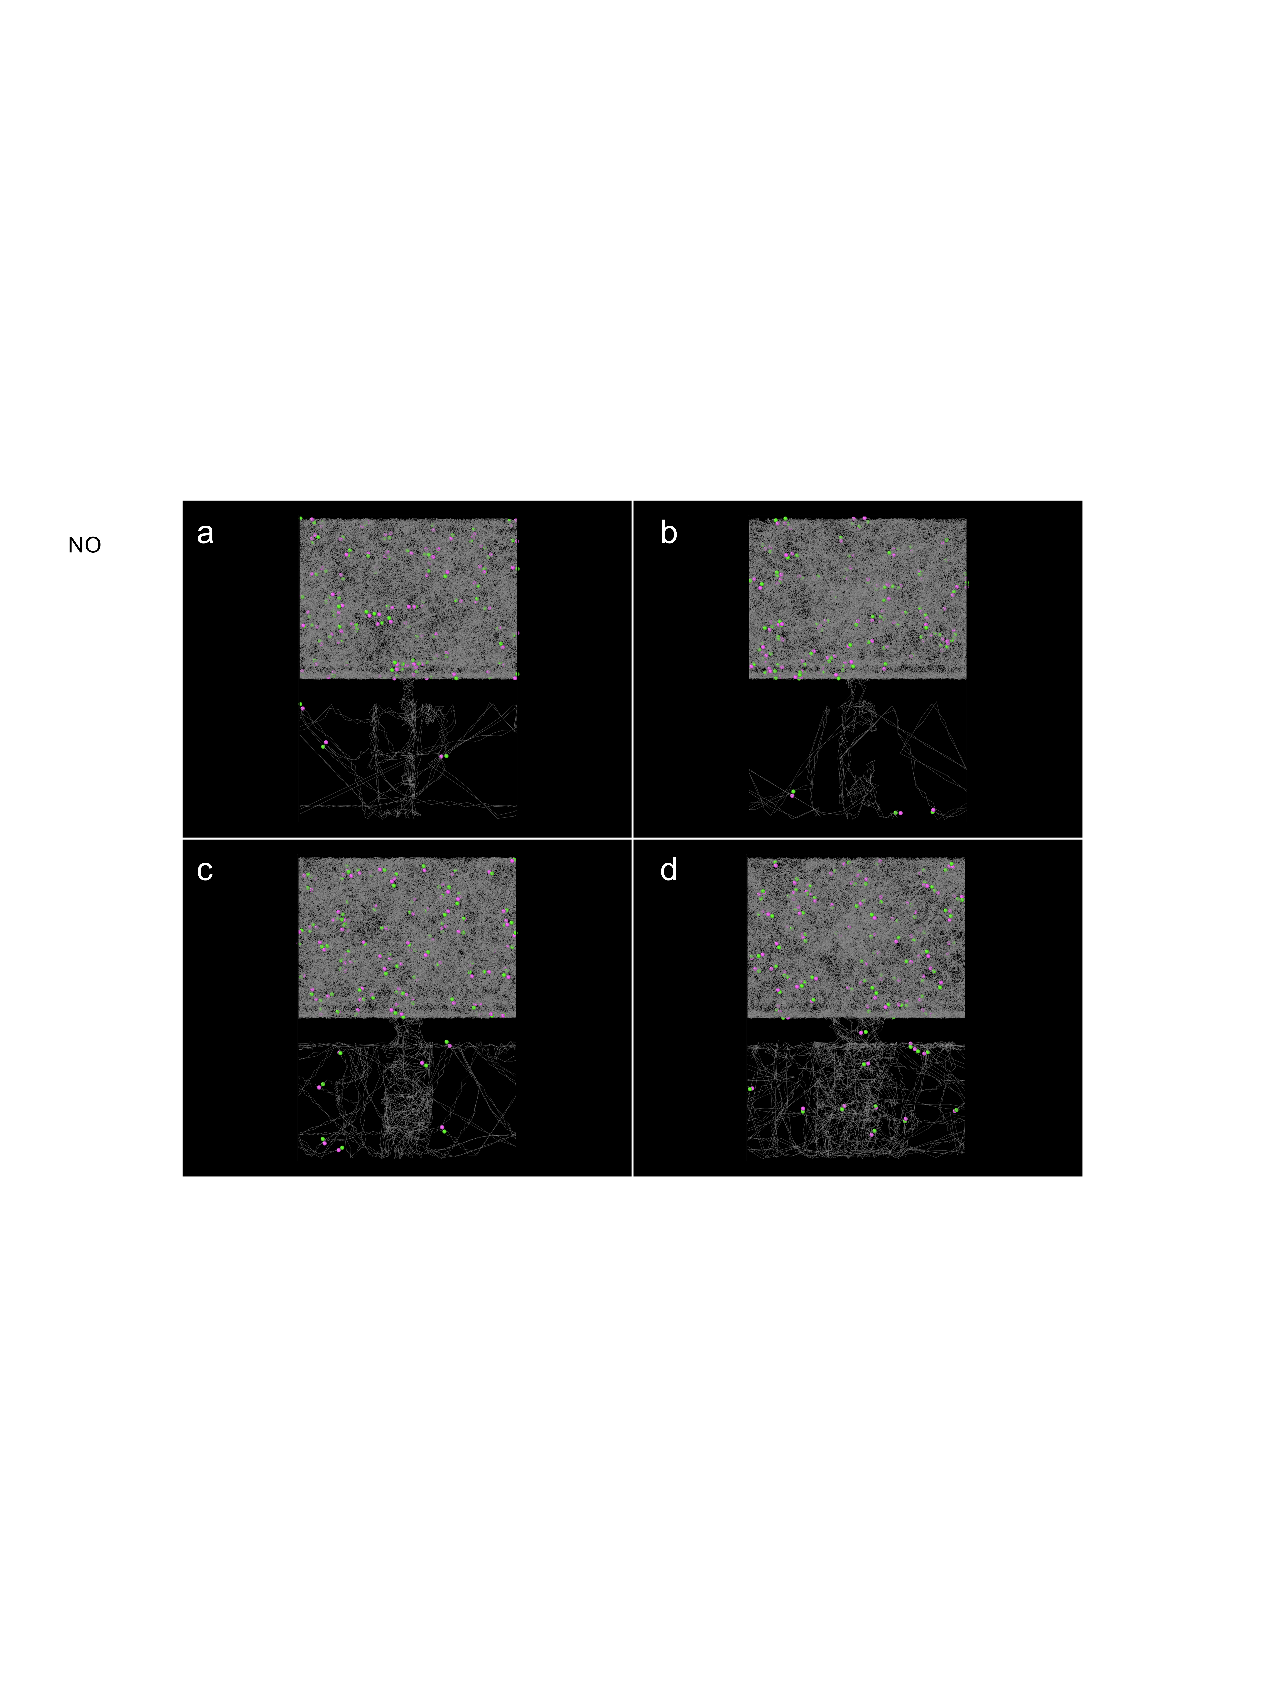


**Supplementary Fig. 40**. Molecular dynamics (MD) simulation trajectories of NO diffusion in nanocavities with diameters of 1.0 nm, 1.5 nm, 1.8 nm and 2.6 nm within 10000 fs (LAMMPS, ReaxFF force field, NVT ensemble, 300 K).


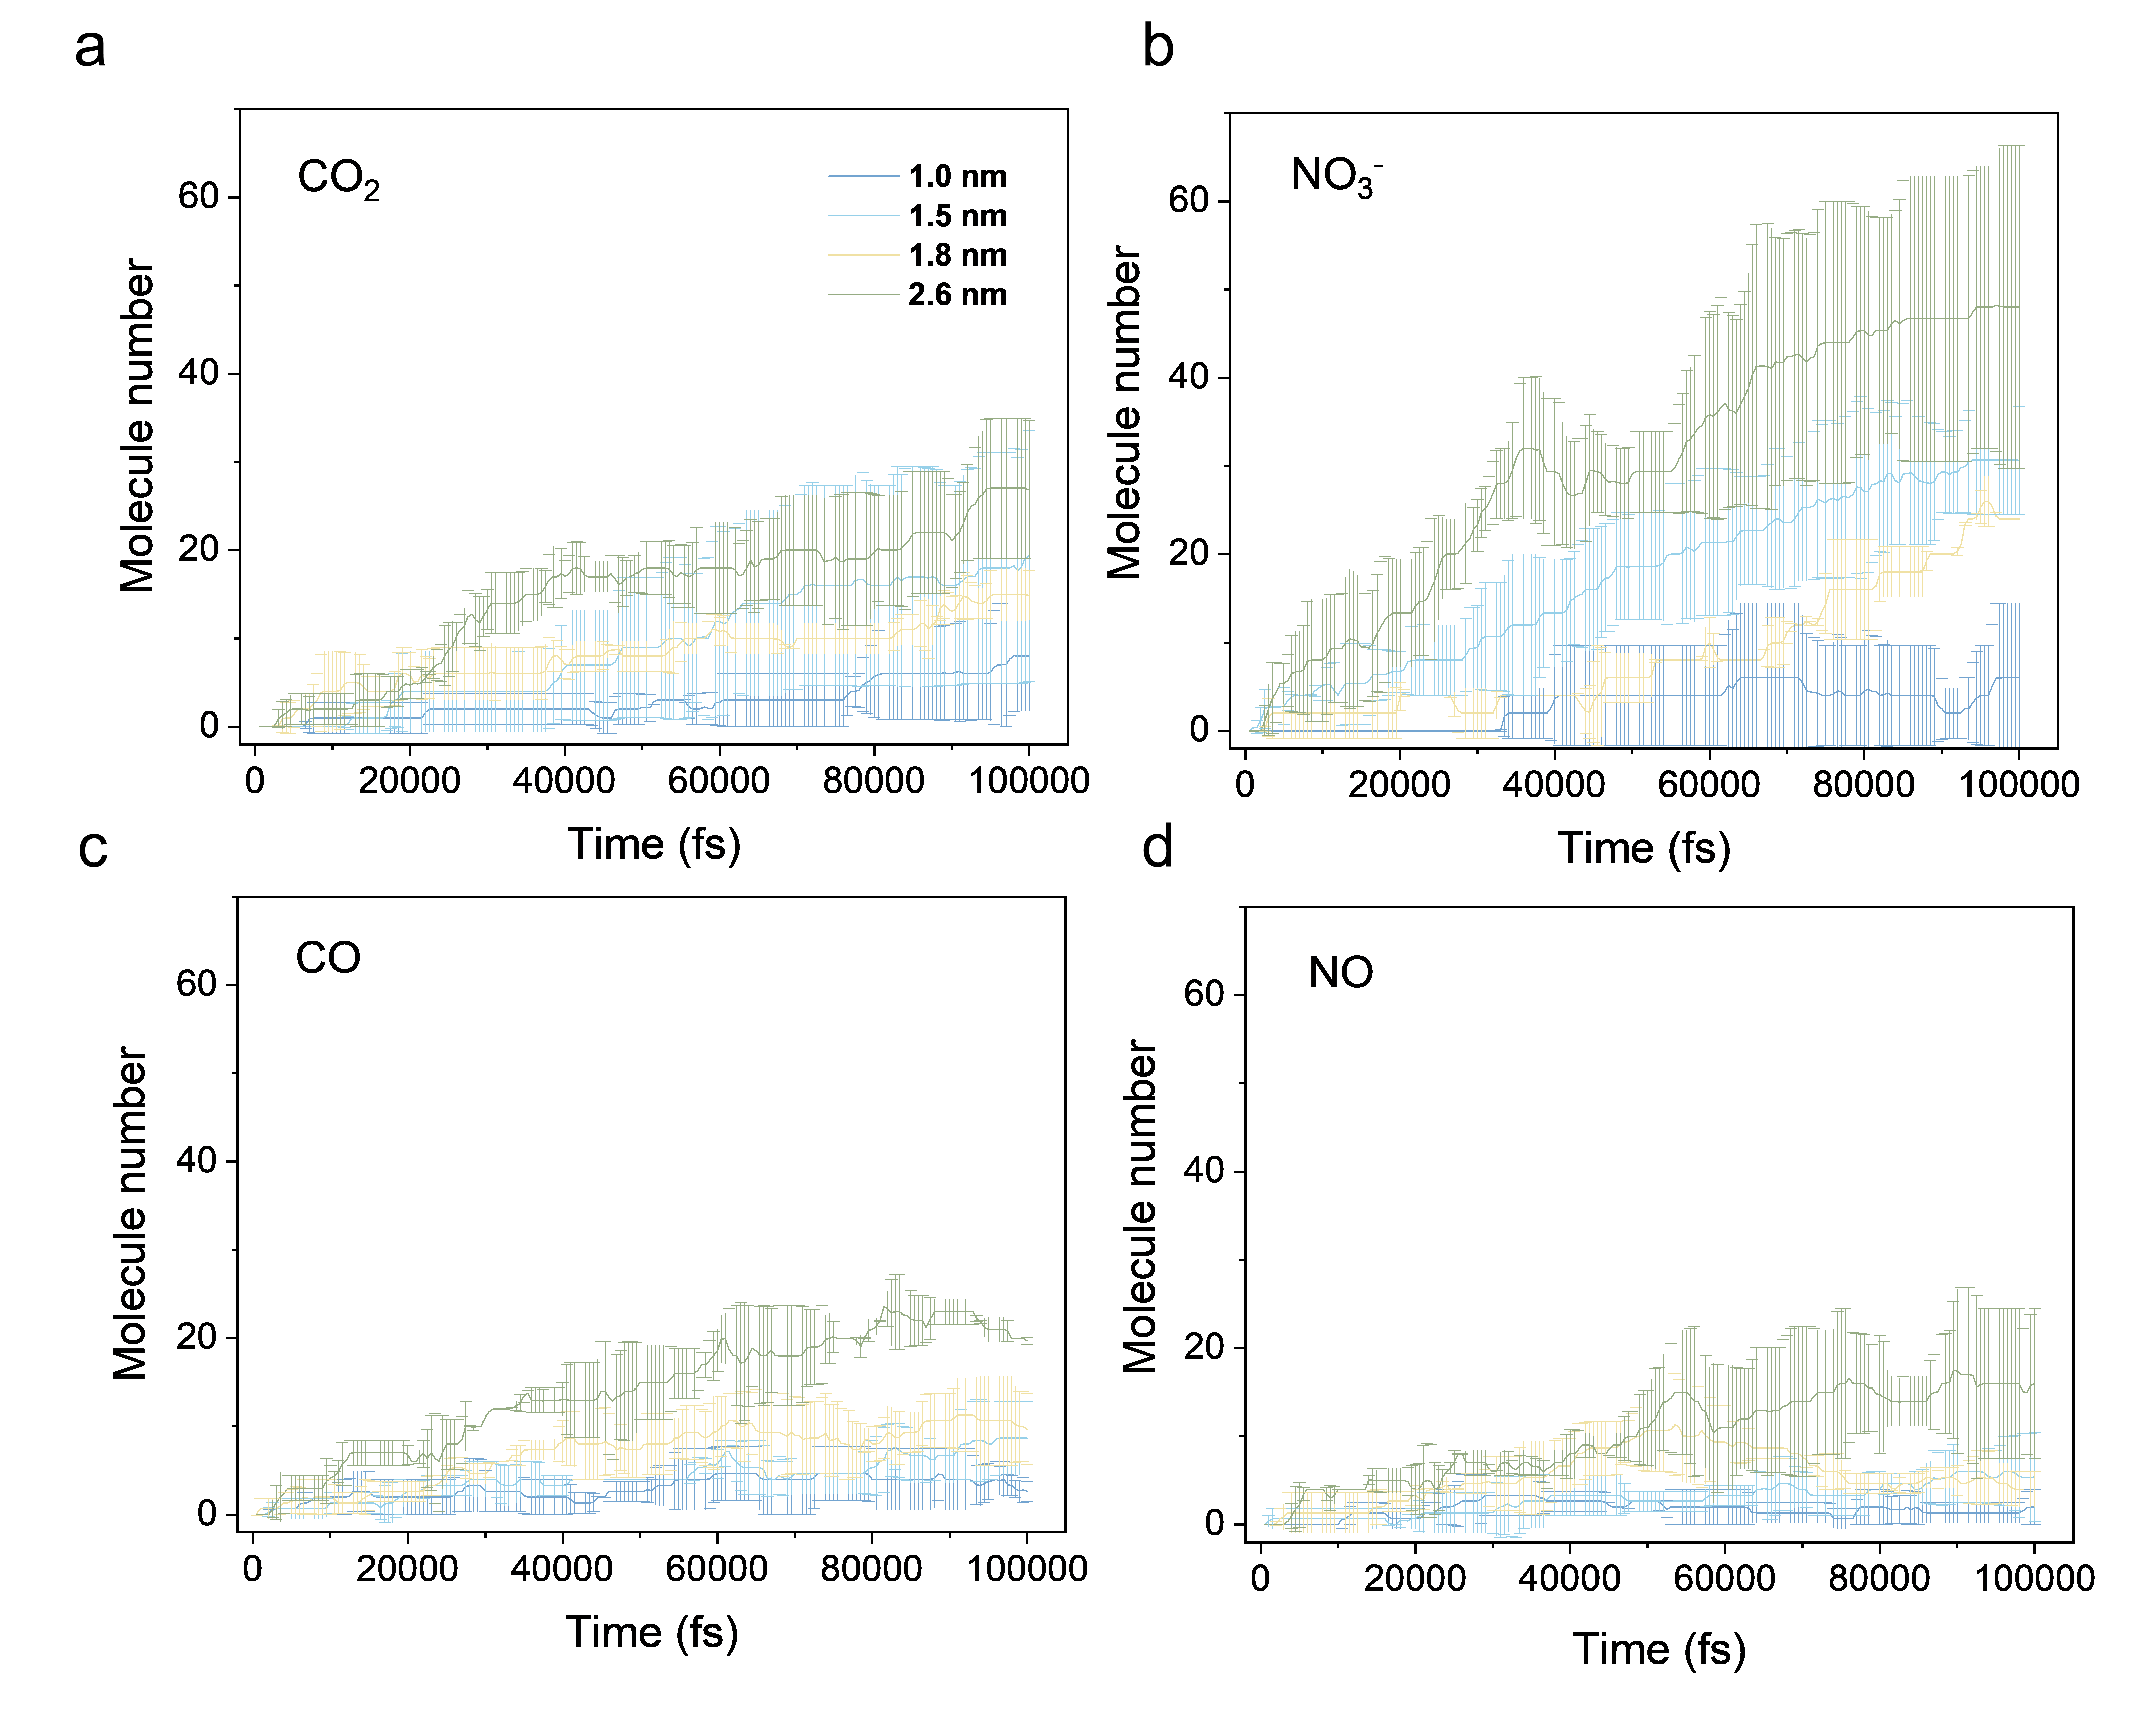


**Supplementary Fig. 41**. Time-dependent molecule numbers of CO2, NO3⁻, CO and NO in nanocavities with different diameters within 10000 fs, calculated via MD simulation.


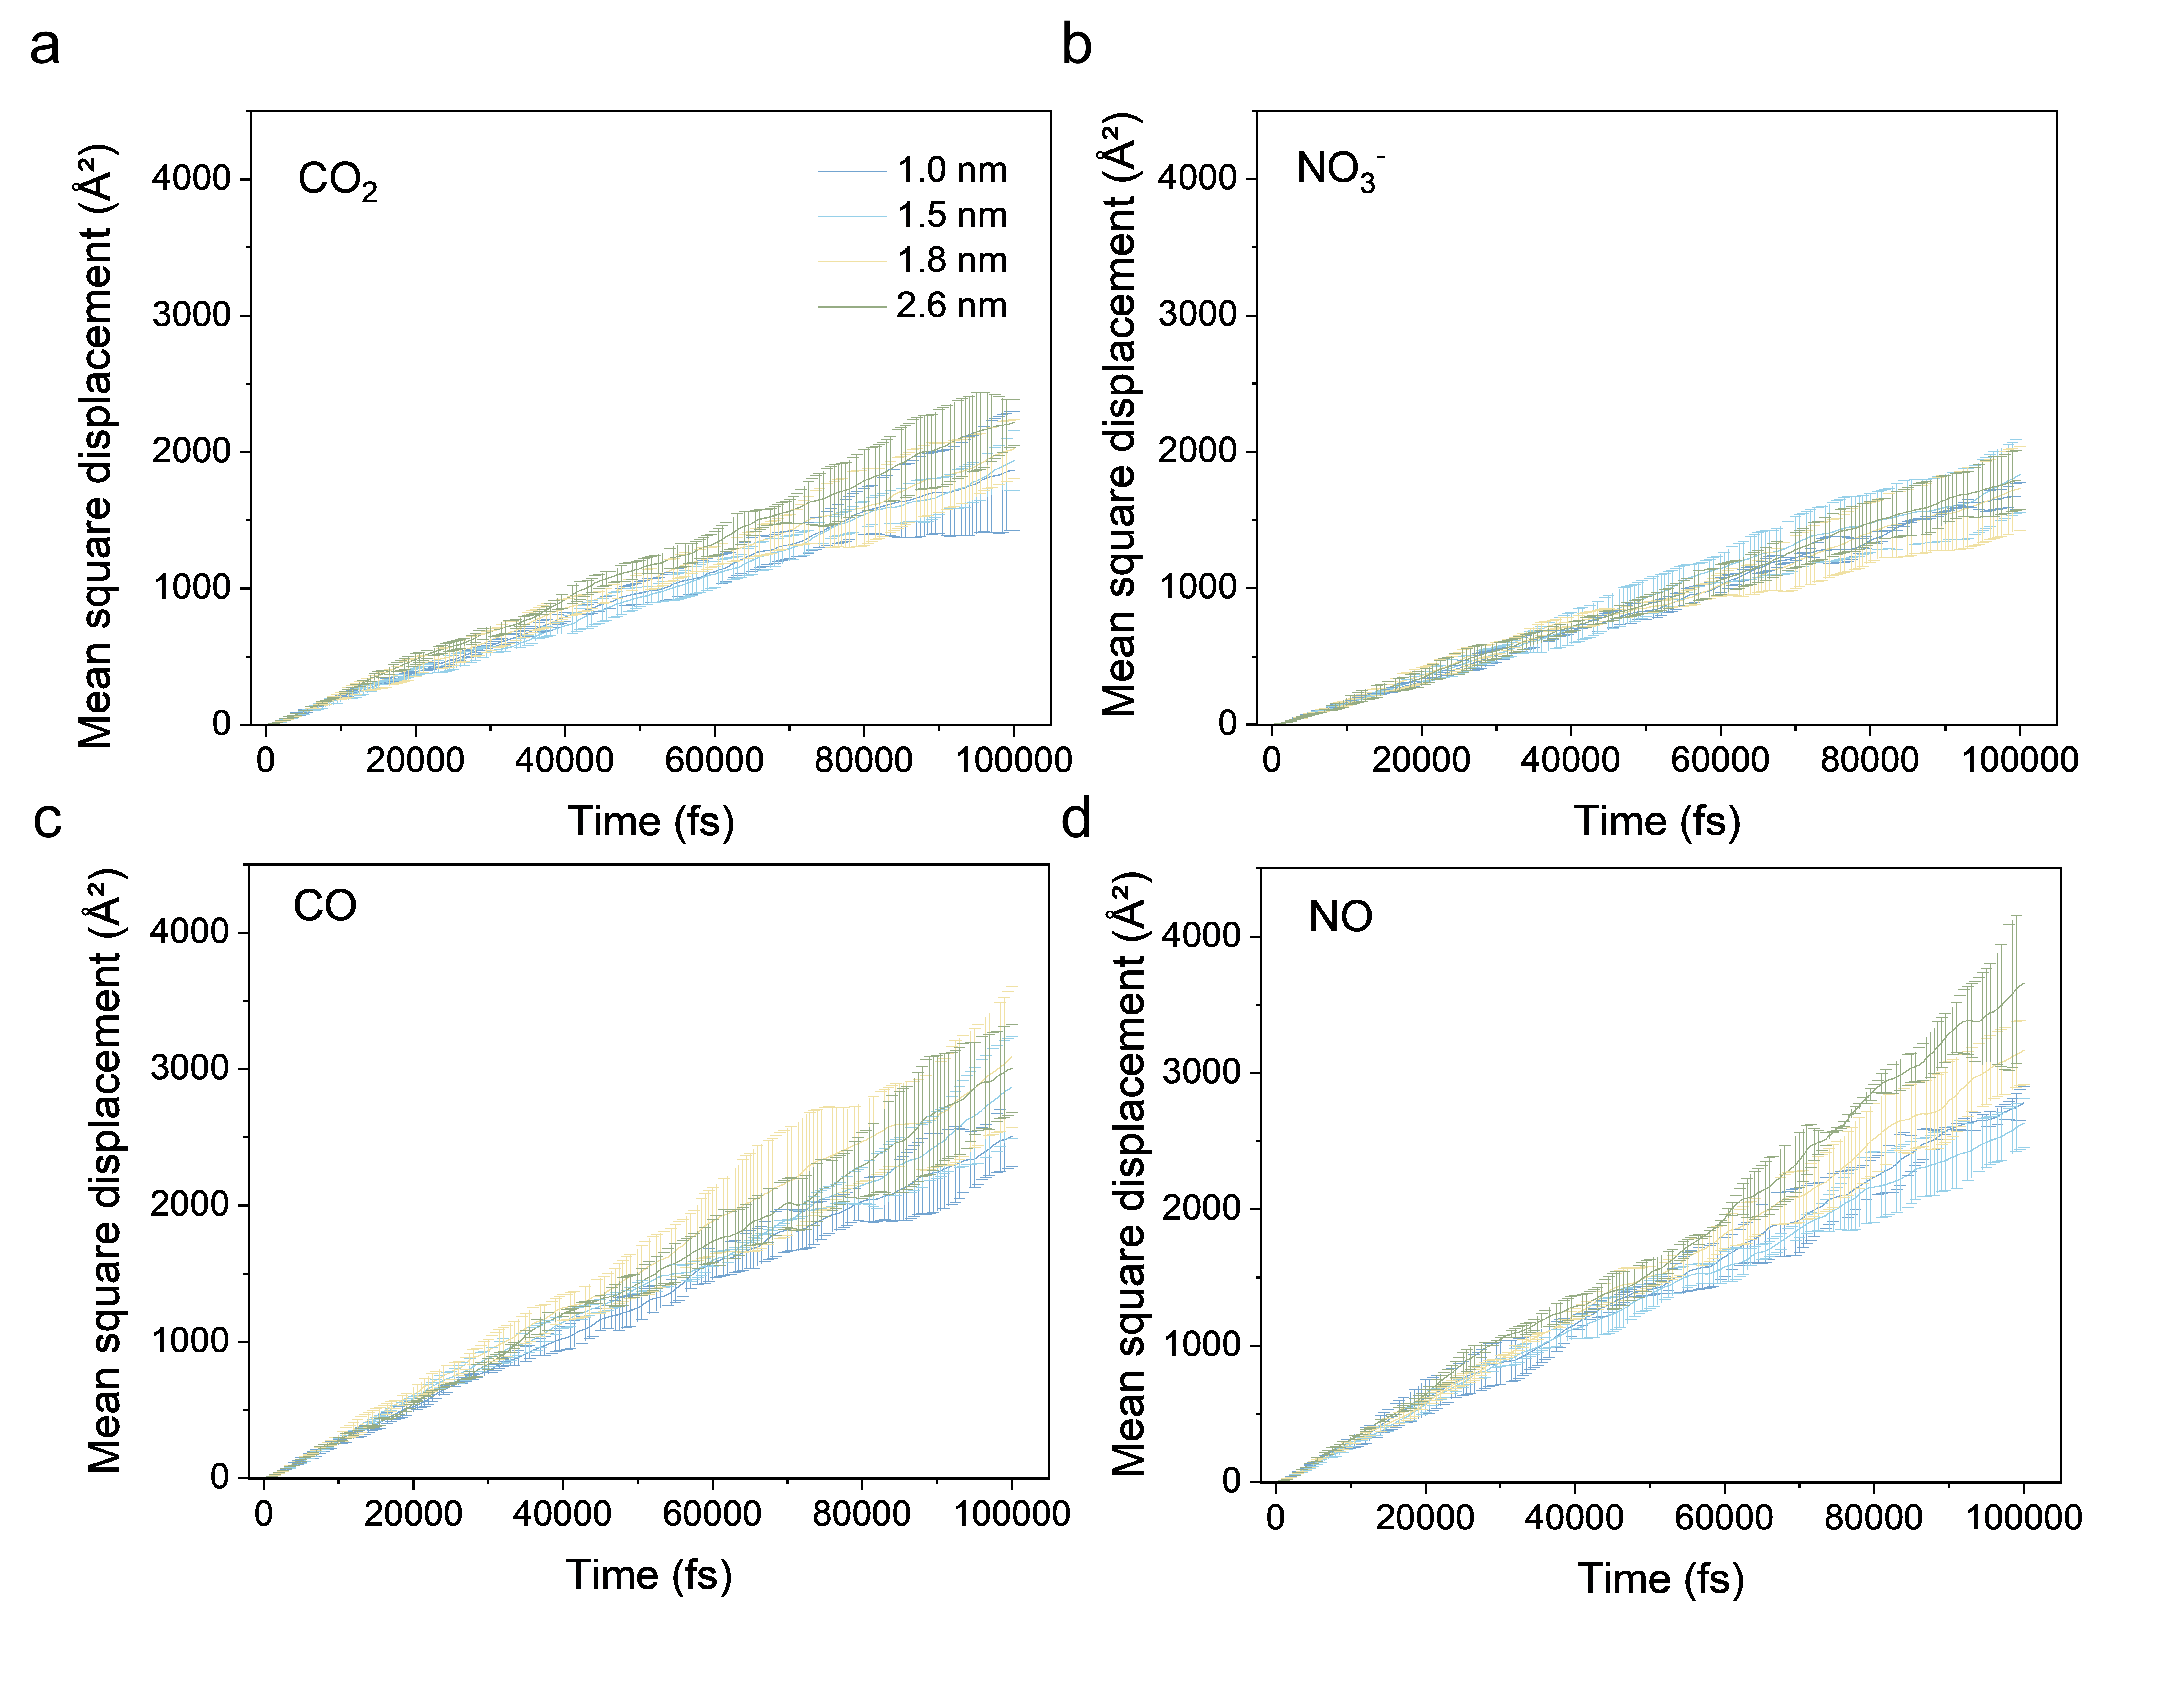


**Supplementary Fig. 42**. Time-dependent mean square displacement (MSD) of CO2, NO3⁻, CO and NO in nanocavities with different diameters within 10000 fs, calculated via MD simulation.


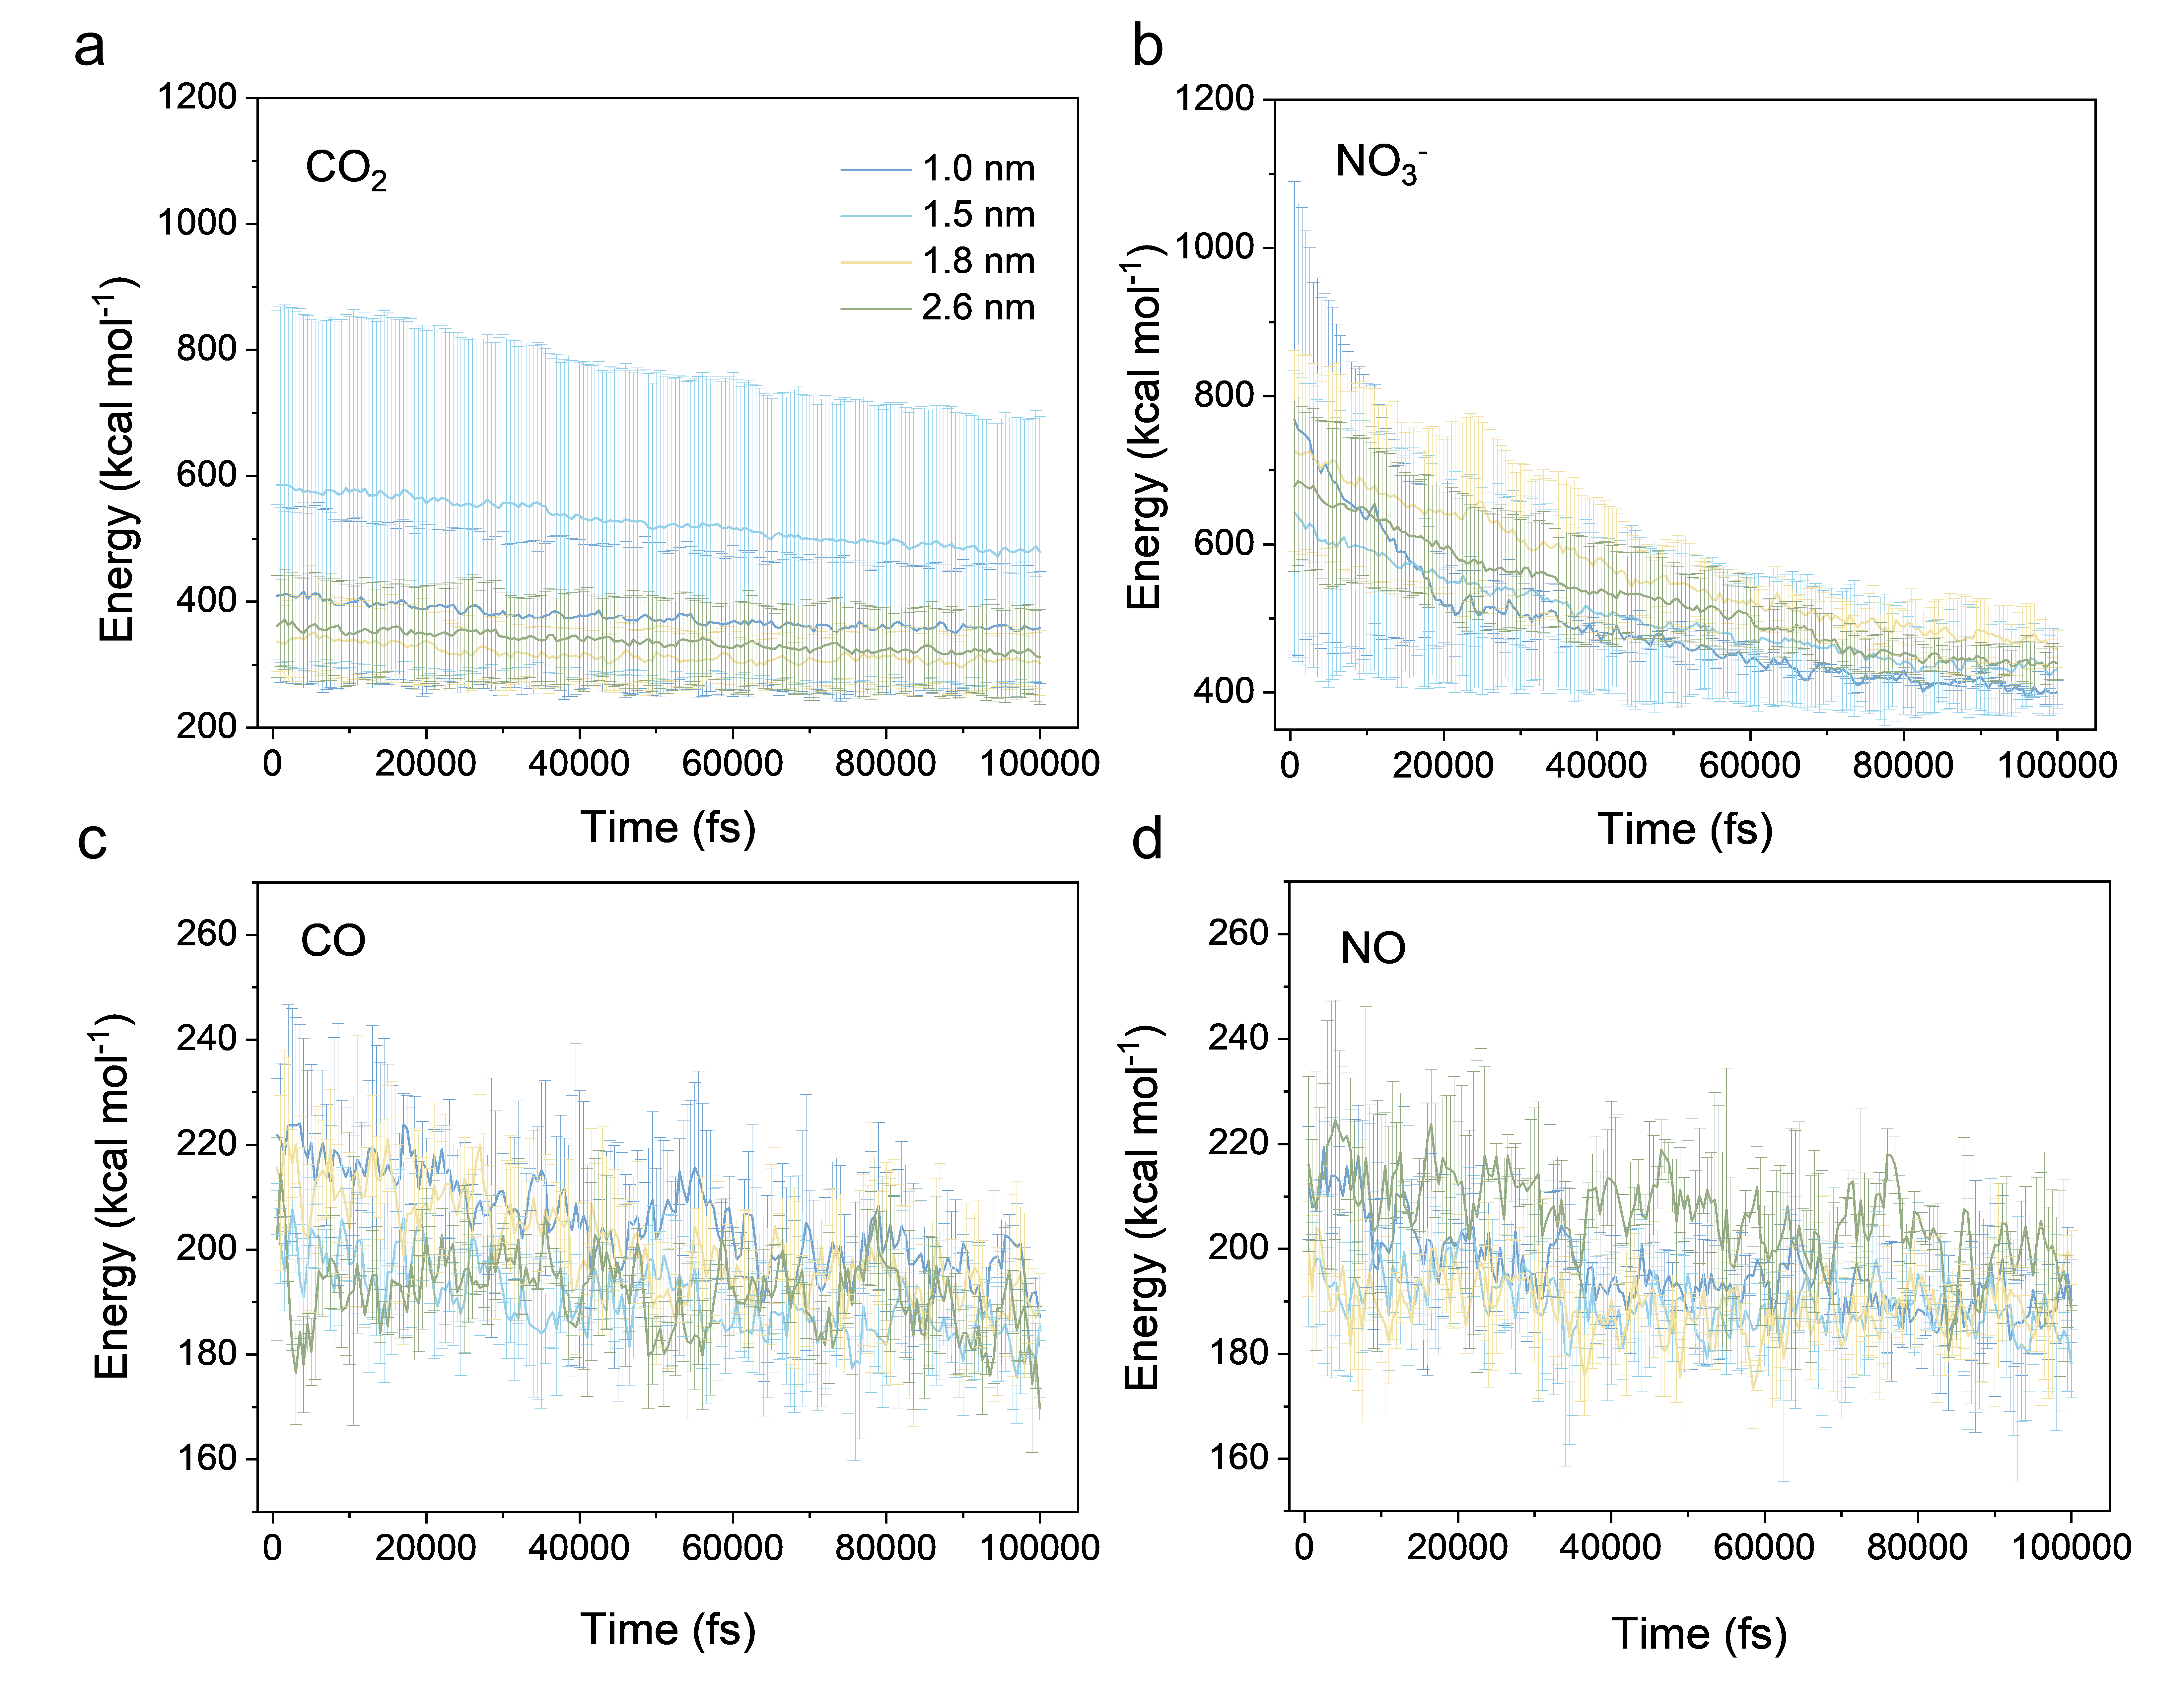


**Supplementary Fig. 43**. Time-dependent kinetic energy of CO2, NO3⁻, CO and NO in nanocavities with different diameters within 10000 fs, calculated via MD simulation.


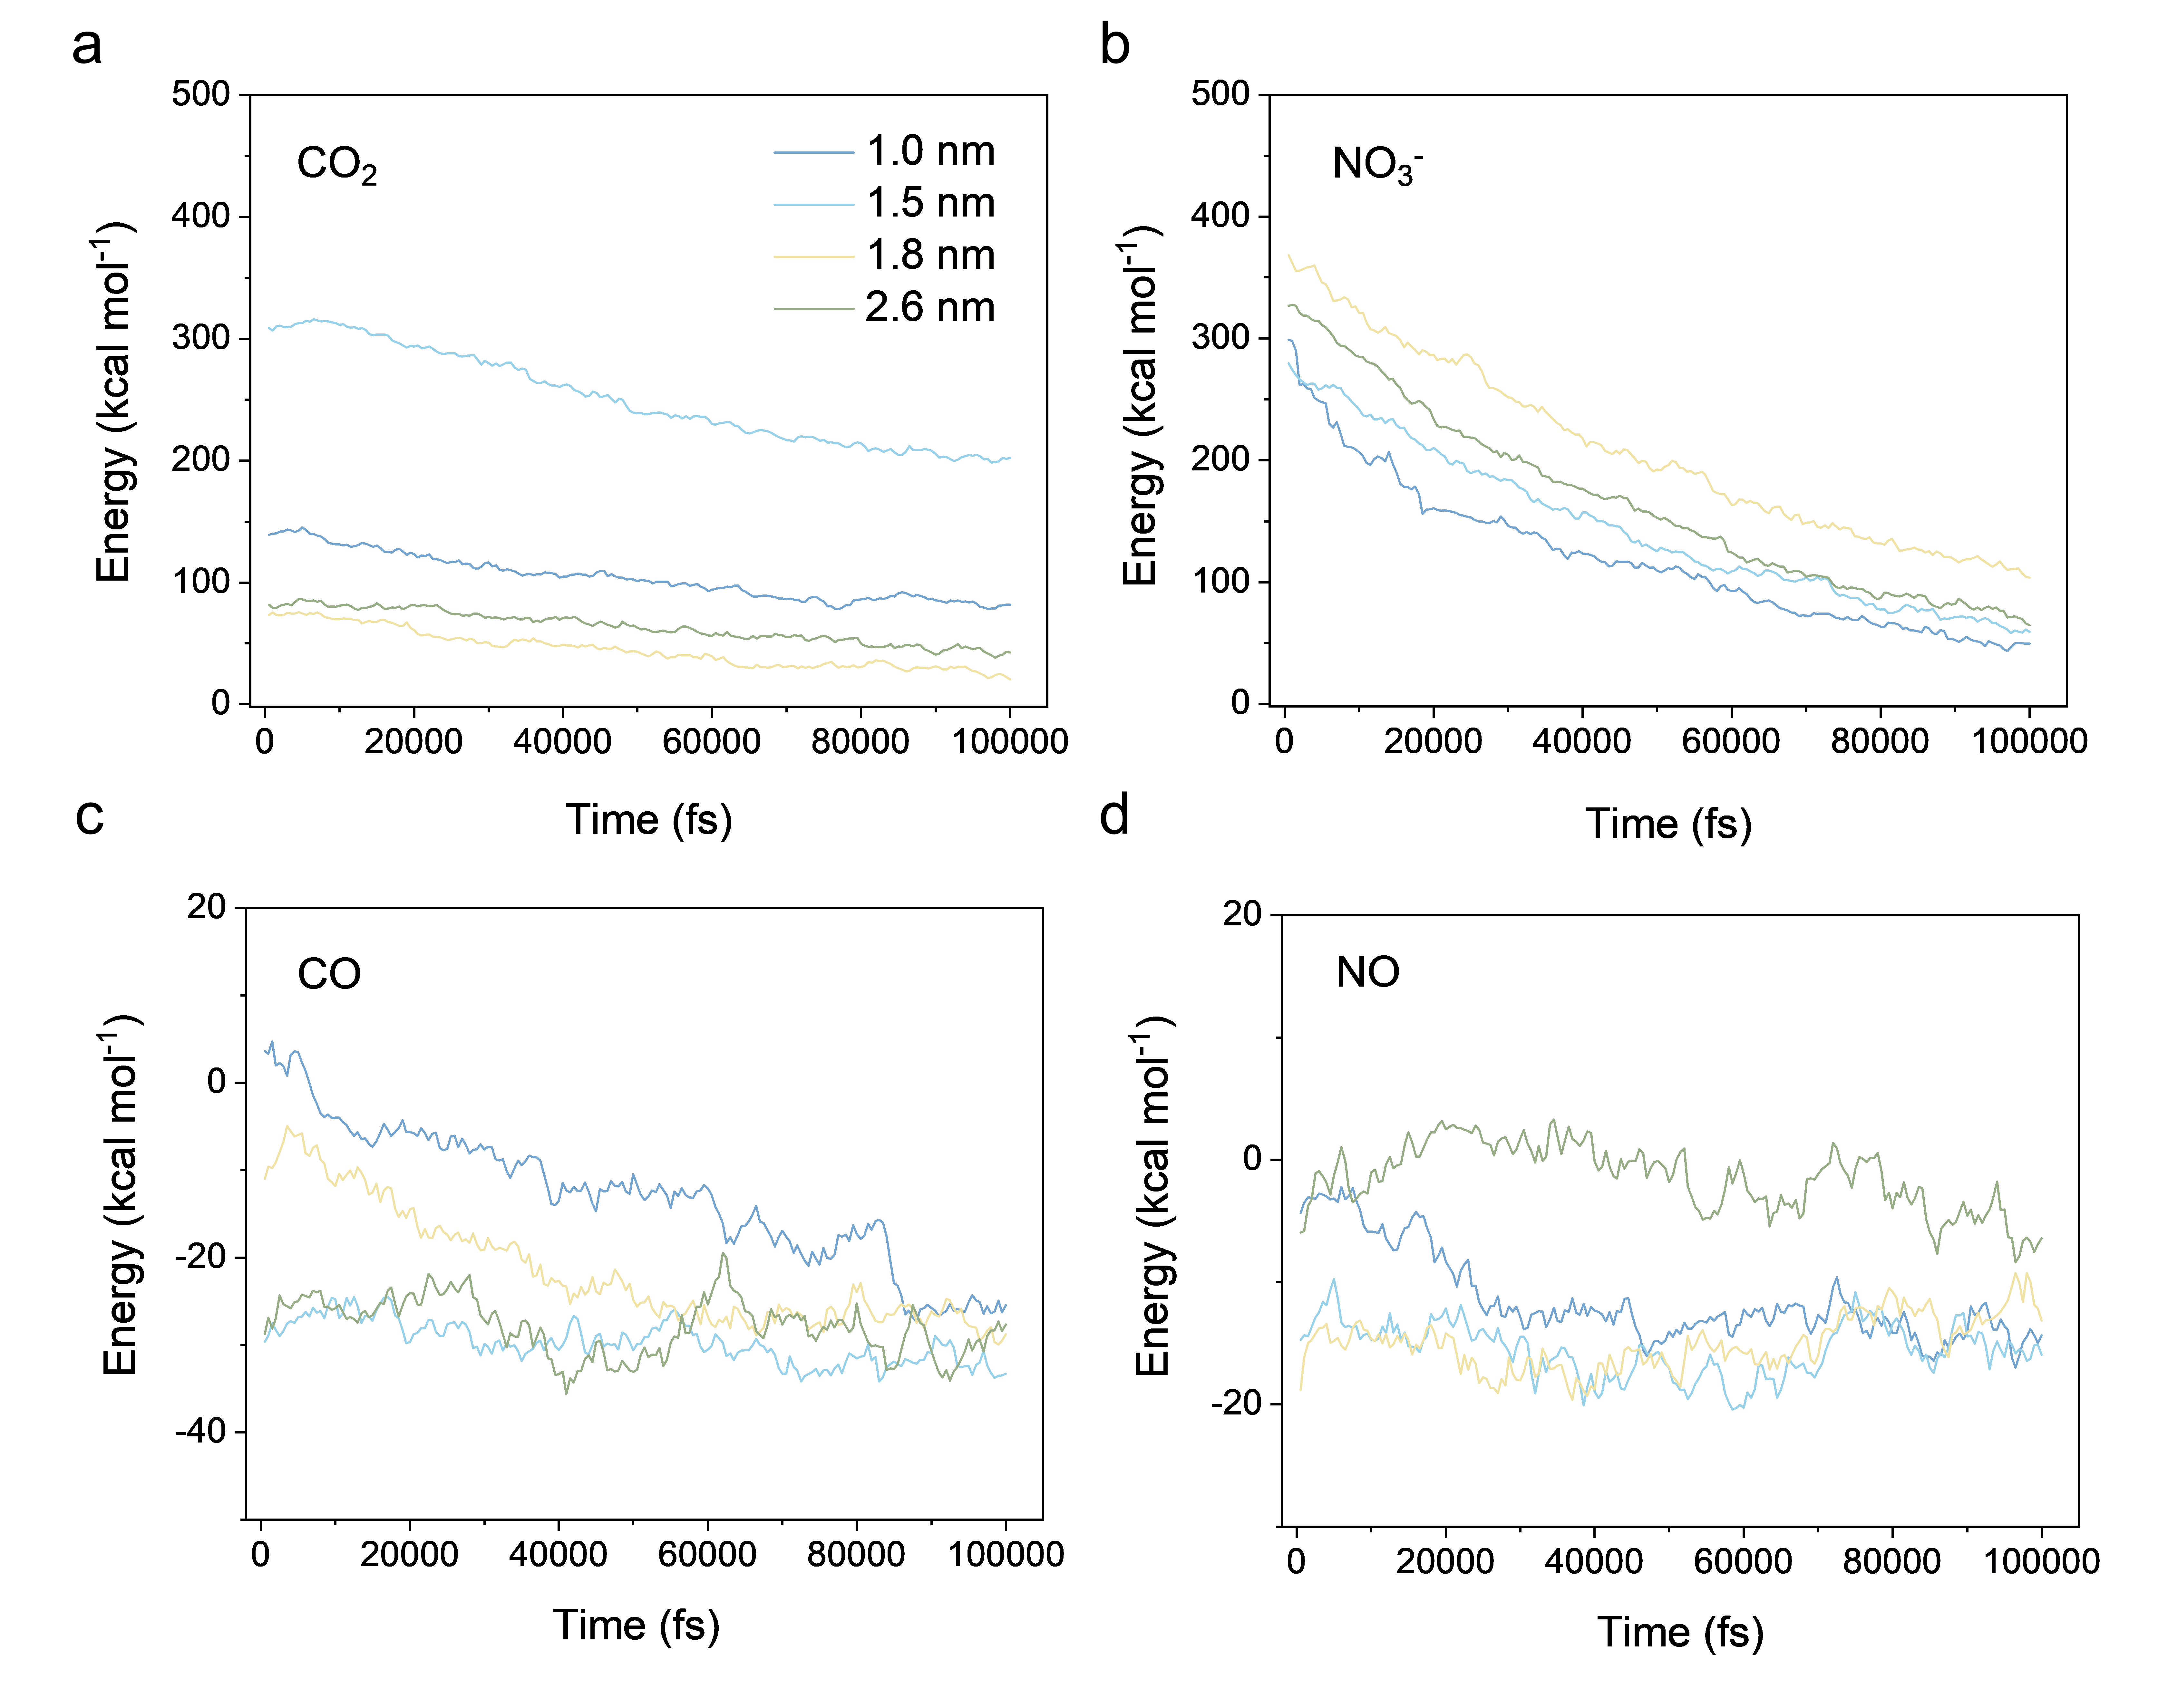


**Supplementary Fig. 44**. Time-dependent potential energy of CO2, NO3⁻, CO and NO in nanocavities with different diameters within 10000 fs, calculated via MD simulation.

**The Supplementary Videos** show full-atom MD simulation trajectories of NO3– diffusion in nanocavities with inner diameters of 1.0 nm (Video 1), 1.5 nm (Video 2), 1.8 nm (Video 3) and 2.6 nm (Video 4) within 10000 fs. All simulations were performed via LAMMPS with ReaxFF force field under NVT ensemble at 300 K.

**Detailed analysis of geometric confinement effect:** The size-dependent geometric confinement effect of the nanocavities exerts a differentiated regulatory effect on the diffusion, enrichment, and retention of different reaction species, which directly determines the C–N coupling performance of the catalysts, and shows a high degree of consistency with the experimental results of reactant concentration regulation. Overall, the confinement effect increases gradually as the cavity diameter decreases from 2.6 nm to 1.0 nm, following a "lock-and-key" matching mechanism. The confinement effect is negligible in over-sized cavities (2.6 nm), increases significantly in size-matched cavities (1.5–1.8 nm), and becomes counterproductive in over-contracted cavities (1.0 nm), where reactants cannot enter the cavity at all, a classic "too much of a good thing" effect in nanoconfinement catalysis.

The difference between species is observed in the number of molecules entering the cavity (Supplementary Fig. 41), where CO2 and NO3⁻ show a much more dramatic change with cavity size than CO and NO. For NO3⁻, the number of molecules entering the 1.8 nm cavity is 4 times that in the 1.0 nm cavity; for CO2, the number of molecules in the 1.8 nm cavity is 1.85 times that in the 1.0 nm cavity. In contrast, the number of CO and NO molecules entering the cavity only changes by 2–3 times across the entire cavity size range, with a much milder size dependence. This difference arises from: (I) NO3⁻ is a hydrated anion with a larger effective diameter (0.63 nm) than neutral CO2 (0.33 nm), CO (0.38 nm), and NO (0.37 nm), making its diffusion into the cavity much more sensitive to the pore size; (II) the positively charged Cu–N4 sites in the cavity exert a strong electrostatic attraction to the anionic NO3⁻, which amplifies the enrichment effect in the size-matched cavity, while this electrostatic interaction is absent for neutral CO2, CO, and NO molecules.

For the kinetic energy and potential energy changes of the molecules (Supplementary Figs. 43 and 44), NO3⁻ again shows the most significant variation with cavity size. In the 1.0 nm cavity, the kinetic energy of NO3⁻ drops by 92% within 5 ps, the fastest among all species; in the 1.8 nm cavity, the variation range of NO3⁻ kinetic energy is from 726.1 kcal mol–1 to 458.8 kcal mol–1, while the kinetic energy of CO2 only varies from 336.5 kcal mol–1 to 302.8 kcal mol–1, and CO/NO show almost no change. The potential energy follows the same trend, with NO3⁻ exhibiting 264.8 kcal mol–1 potential energy drops in the 1.8 nm cavity, compared to 52.9 kcal mol–1 for CO2 and less than 20 kcal mol–1 for CO/NO. This confirms that the nanoconfined cavity interacts most strongly with NO3⁻, making its diffusion and adsorption behavior the most sensitive to cavity size.

These molecular-level insights are fully consistent with the experimental results of reactant concentration regulation (Supplementary Fig. 34). The strong size sensitivity and enrichment effect of NO3⁻ in the nanocavities explain why increasing the bulk NO3⁻ concentration leads to a nearly linear increase in urea yield, with no saturation observed. The higher the bulk NO3⁻ concentration, the stronger the electrostatic enrichment effect in the cavity, which continuously increases the local NO3⁻ concentration at the active sites, thus accelerating the generation of *NO intermediates and promoting C–N coupling. In contrast, the weak size sensitivity and enrichment effect of CO2 lead to a rapid saturation of its promotion effect. Once the bulk electrolyte is saturated with CO2, further increasing the CO2 flow rate cannot increase the local CO2 concentration in the cavity, so the urea yield maximized. This perfect consistency between MD simulation and electrochemical experiments provides a solid mechanistic foundation for the nanoconfinement design principle of urea electrosynthesis catalysts.

**Section 4.2. Electronic confined effect calculation**

**Confined electric field calculation method:** All periodic density functional theory calculations were performed using the Vienna Ab initio Simulation Package (VASP 6.4.4)50,51. The projector augmented wave method was adopted to describe electron-ion interactions, and the Perdew-Burke-Ernzerhof (PBE) functional within the generalized gradient approximation (GGA) was used to treat exchange-correlation interactions. Spin polarization was enabled for all calculations involving Cu sites, and the DFT-D3 method was applied to correct van der Waals interactions.

Geometric optimization of confined cavity models was conducted with a plane-wave cutoff energy of 450 eV. Ionic relaxation proceeded until the total energy change per atom converged to below 1×10–5 eV and the maximum atomic force was less than 0.02 eV Å–1. The conjugate gradient algorithm was applied for ionic relaxation, with only ionic positions relaxed to preserve the original cavity geometry. Electronic self-consistent field calculations were performed with a convergence threshold of 1×10–8 eV, and all projection operations were executed in reciprocal space to avoid numerical errors. Calculations for confined electric field distribution adopted an increased plane-wave cutoff energy of 500 eV to ensure the accuracy of electrostatic potential output.

Bader charge analysis was performed to quantify charge transfer of Cu active sites. The core charge density was subtracted from the total charge density to obtain the valence charge density distribution, and Bader volumes were partitioned via the zero-flux surface algorithm. Charge transfer amount was derived from the difference between the formal valence electron number and the Bader charge of the Cu atom.

The localized confined electric field was calculated based on electrostatic potential data from optimized structures. Total electrostatic potential including ionic and electronic contributions was extracted from output files, with corresponding parameters enabled in the input file to ensure complete data capture. The electric field vector was defined as the negative gradient of the electrostatic potential, and grid-based numerical differentiation was applied to calculate electric field intensity at each grid point within the confined space. Average electric field intensity was obtained by integrating the electric field magnitude over the cavity volume, with atomic core regions excluded to avoid interference from strong electrostatic potential near nuclei. Calculations were performed for all composite tube models with diameters ranging from 1.0 nm to 2.6 nm, with average and local maximum electric field intensities counted specifically for the reaction region within 3 Å of the Cu–N4 active site.

The d-band center of the Cu active site was calculated based on the projected density of states (PDOS) of the Cu 3d orbital obtained from the optimized structure, with the Fermi level (*E*f) uniformly set as the 0.0 eV energy reference. The d-band center () is defined as the energy-weighted average of the Cu 3d orbital PDOS, and the calculation formula is as follows52,53:

where *E* is the orbital energy relative to the Fermi level, is the PDOS value of the Cu 3d orbital at the corresponding energy. The d-band center values of Cu–N4 sites in composite tube models with diameters of 1.0~2.6 nm were calculated respectively to clarify the regulation effect of confined space on the electronic structure of the active site.


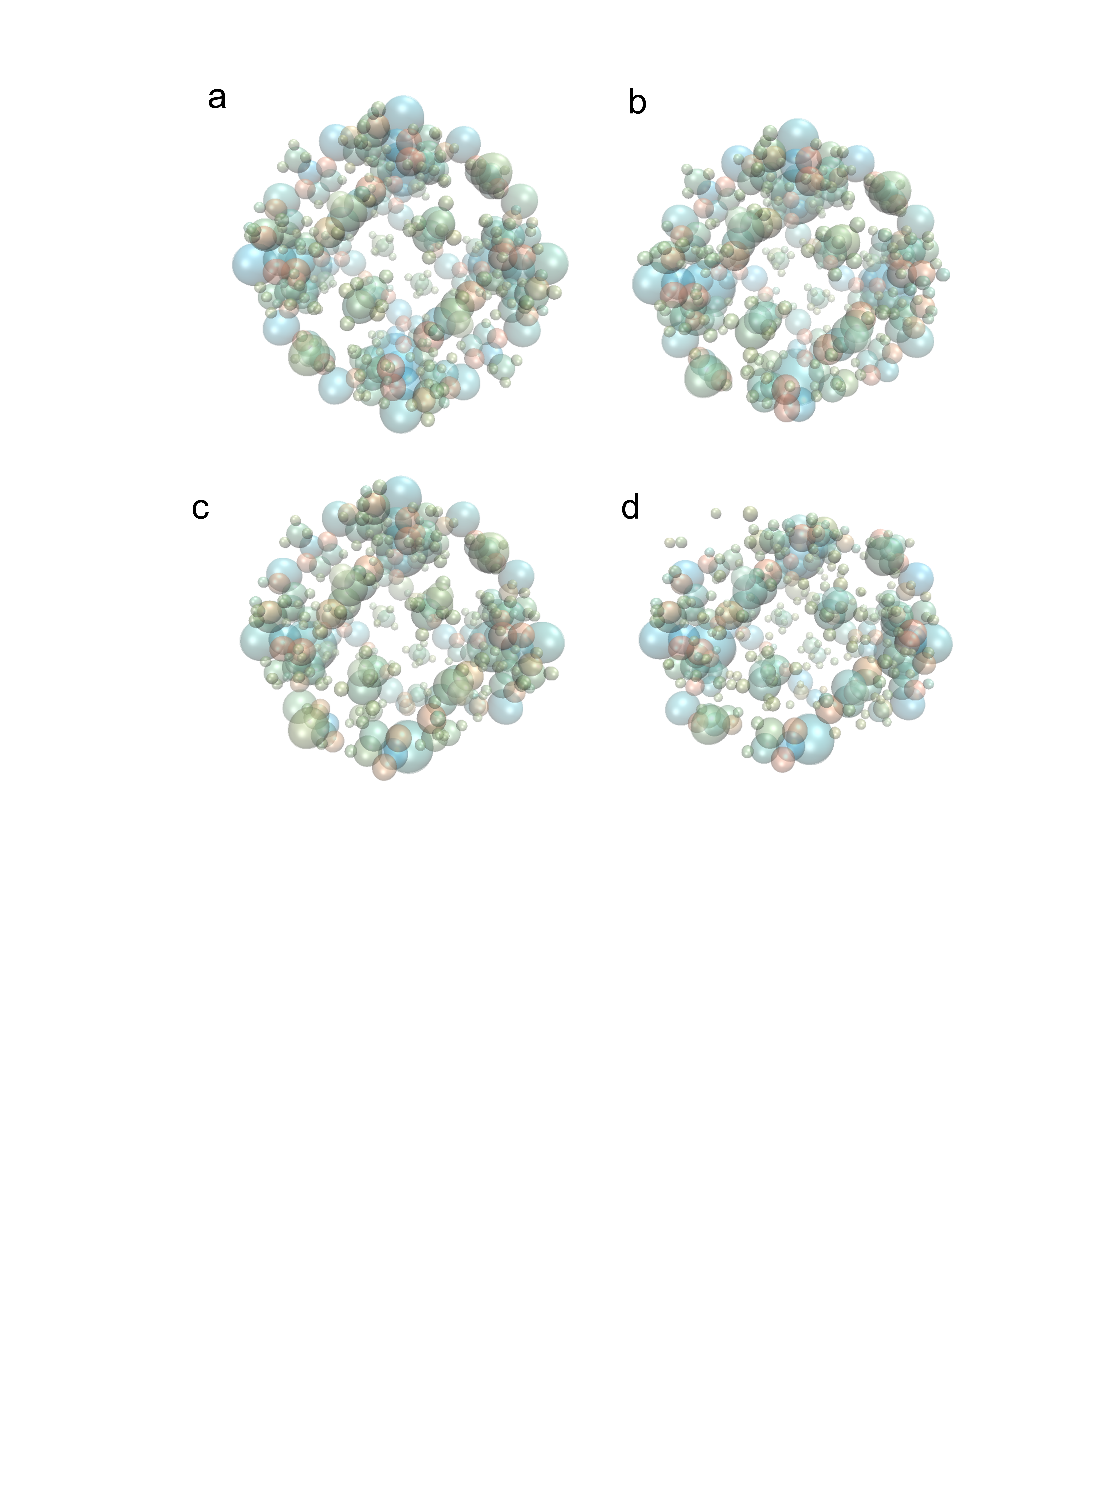


**Supplementary Fig. 45**. Reconstructed Bader charge equipotential surfaces of (a) tZIF-Cu800, (b) tZIF-Cu900, (c) tZIF-Cu1000 and (d) tZIF-Cu1100, calculated via VASP 6.4.4. The results show the charge transfer evolution of Cu active sites during thermal sculpting.


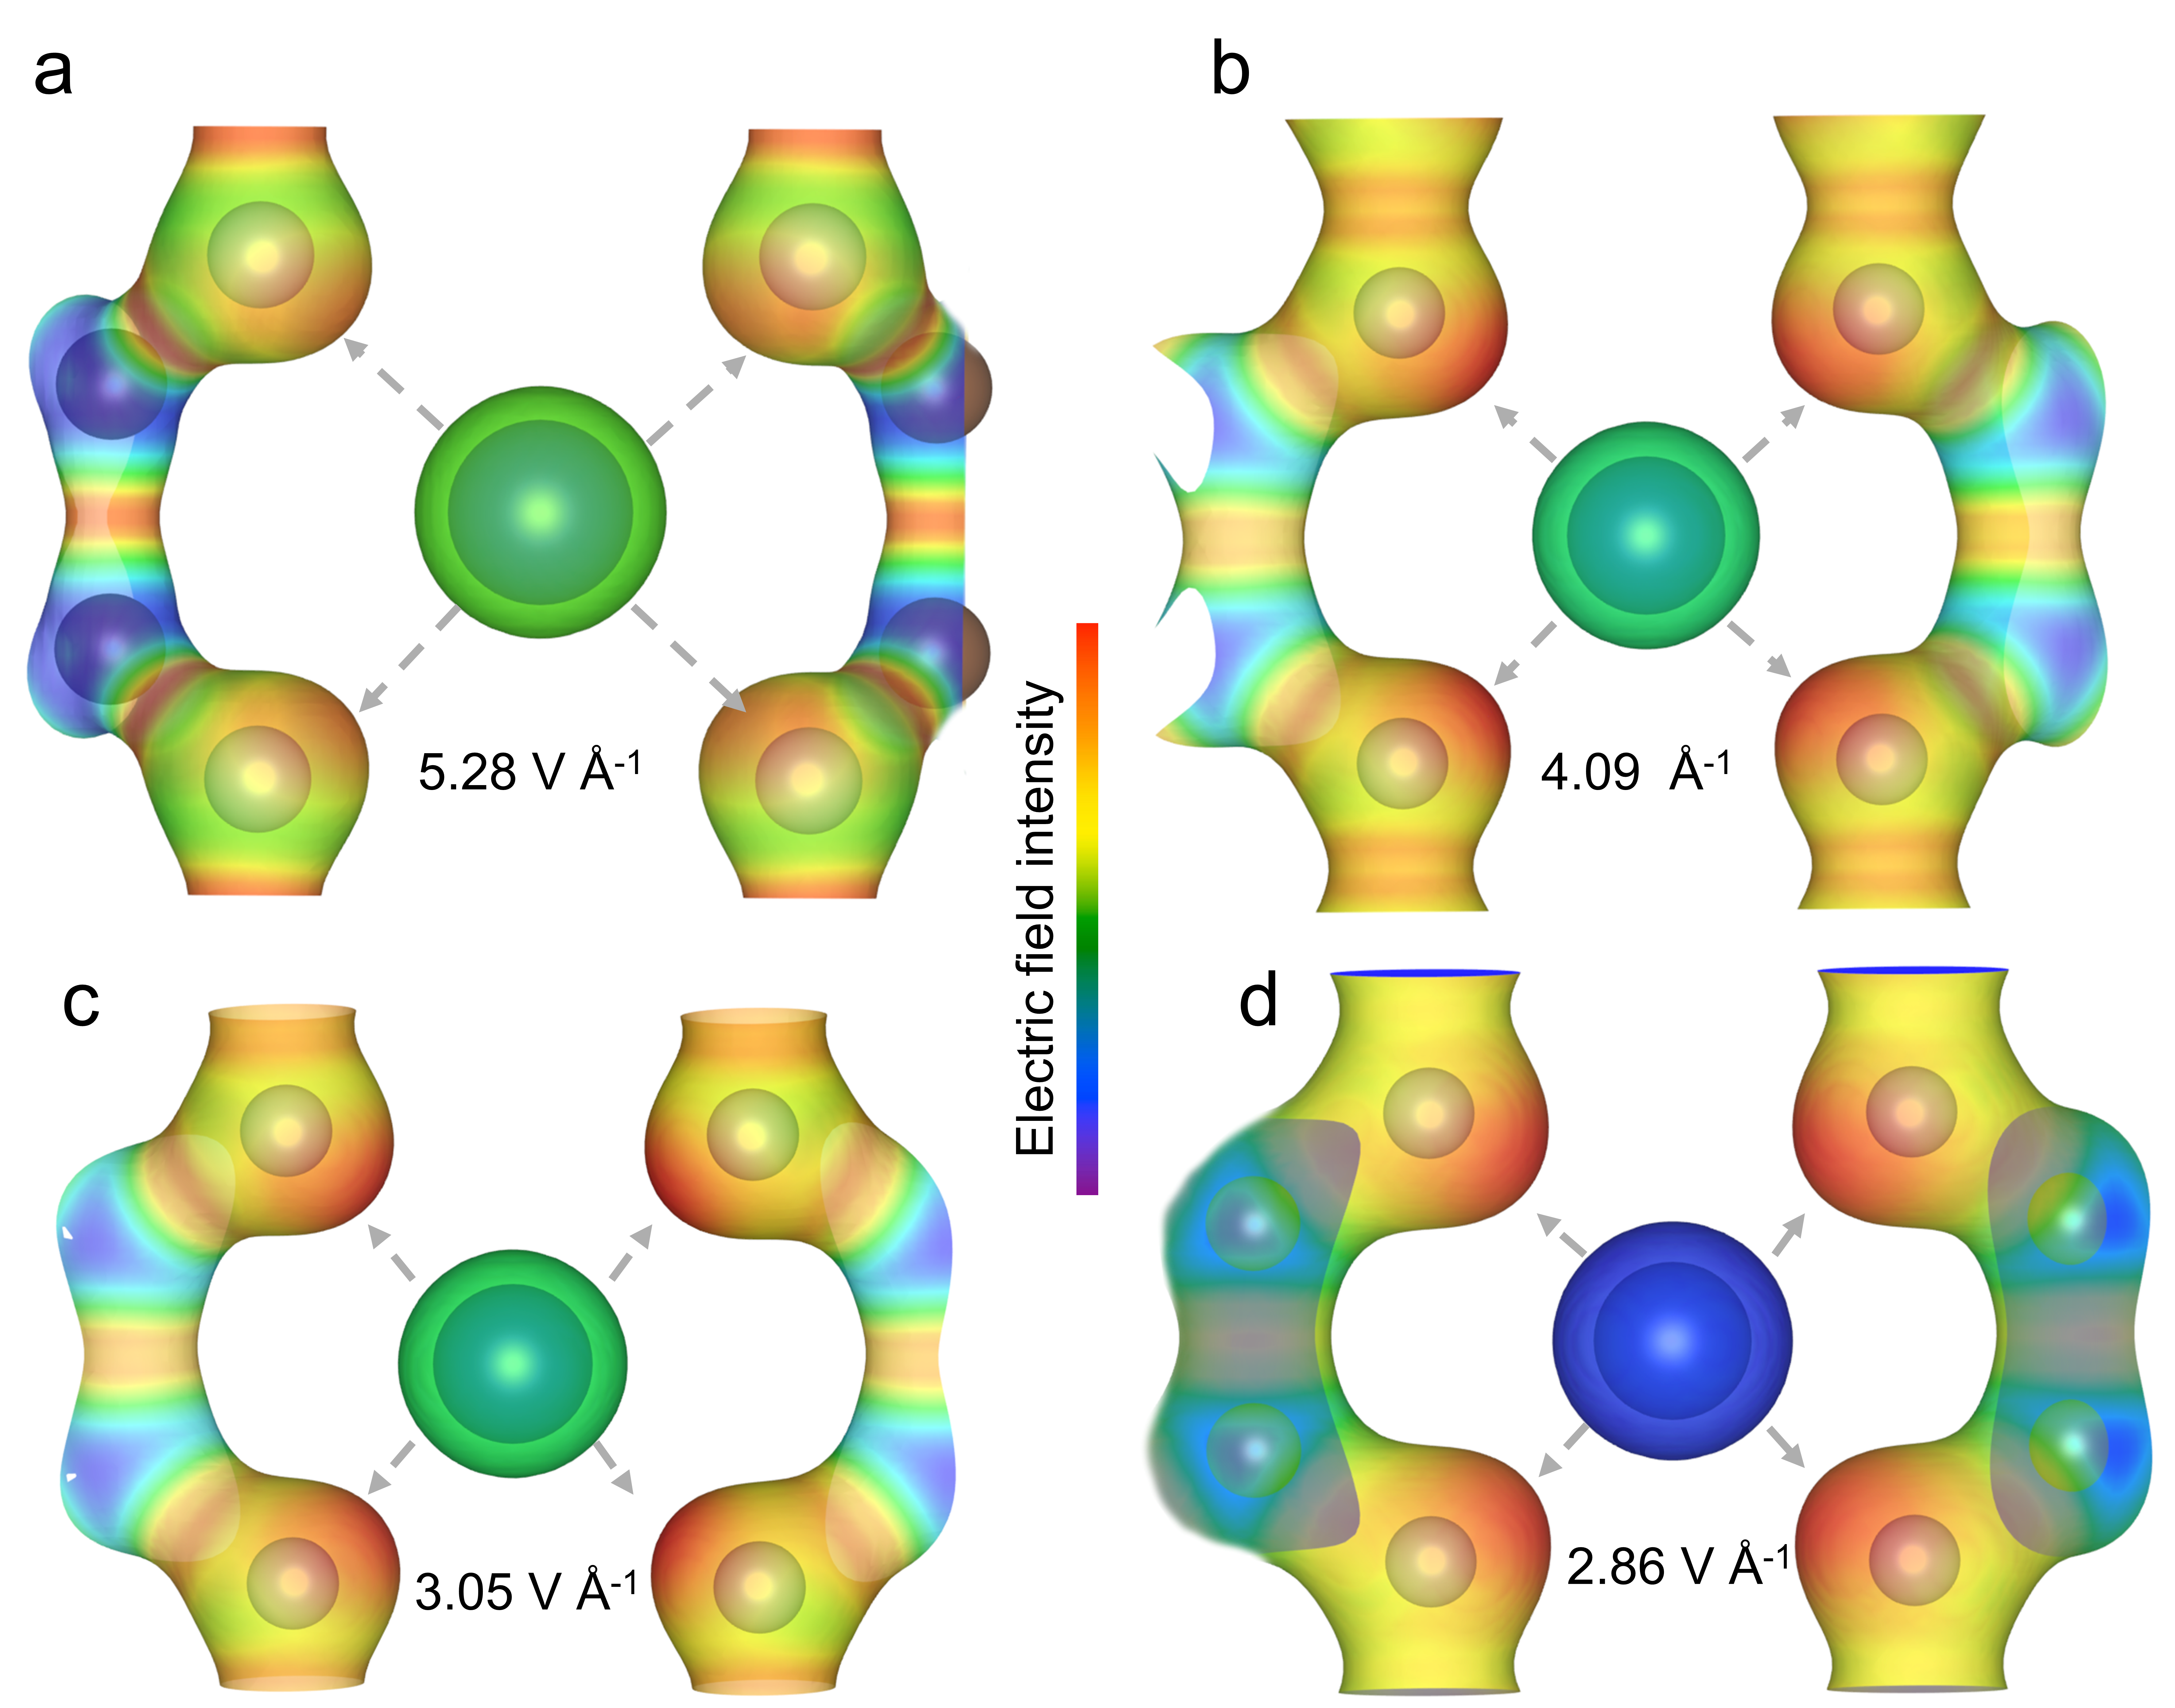


**Supplementary Fig. 46**. Distribution of the confined internal electric field intensity in nanocavities with diameters of (a) 1.0 nm, (b) 1.5 nm, (c) 1.8 nm and (d) 2.6 nm, calculated via VASP 6.4.4. The electric field is induced by the geometric deformation of the Cu–N4 coordination structure.

The average electric field intensity inside the cavity exhibits a non-monotonic trend with cavity diameter. The 1.0 nm over-contracted cavity has the highest average electric field intensity of 5.28 V Å–1, while the 1.8 nm size-matched cavity of tZIF-Cu900 achieves an average electric field intensity of 3.05 V Å–1, the maximum effective value accessible to reactants and active sites. The 1.5 nm cavity has a higher average electric field intensity of 4.09 V Å–1, but its smaller pore size restricts the diffusion of hydrated nitrate into the cavity, whereas the 2.6 nm over-expanded cavity showed a significant drop in average electric field intensity to 2.86 V Å–1, with negligible confinement enhancement effect. The strong confined electric field in the 1.8 nm cavity originates from two synergistic effects. One is the non-uniform charge distribution on the inner surface of the pyridinic N-rich concave carbon cavity wall, and another is coulombic superposition from the positively charged Cu–N4 active site at the cavity center. The electric field intensity in the central region of the 1.8 nm cavity where the Cu active site located is 1.8 times higher than that at the cavity wall, confirming that the active center is positioned in the region with the strongest electric field enhancement.

The strong confined electric field directly drives the upshift of the Cu d-band center, which acts as the core electronic origin of enhanced C–N coupling reactivity. Compressive strain induced by the confined electric field weakens the hybridization between Cu 3d and N 2p orbitals and reduces the filling of Cu d anti-bonding orbitals, leading to a significant upshift of the Cu d-band center from –3.36 eV in the non-confined 2.6 nm cavity to –1.85 eV in the 1.0 nm confined cavity54, approaching the Fermi level. A linear correlation is observed between confined electric field intensity and the position of the Cu d-band center, with stronger average electric field in the cavity corresponding to a higher d-band center closer to the Fermi level. This linear relationship establishes a quantitative structure-activity relationship between geometric confinement structure, local electronic environment and catalytic reactivity55. According to d-band center theory, the upshifted d-band center strengthens the adsorption of key reaction intermediates including *CO and *NO on the Cu active site, lowering the energy barrier of the rate-determining C–N coupling step, which is fully consistent with temperature-programmed desorption results. The upshift of the Cu d-band center induced by the confined electric field is further verified by XPS secondary electron cutoff edge results, which shows a gradual upshift from tZIF-Cu1100 to tZIF-Cu800, in good agreement with the calculated d-band center shift56. These results confirm that the nanoconfinement-enhanced local electric field is the core driving force for d-band center modulation and the resulting high C–N coupling performance.


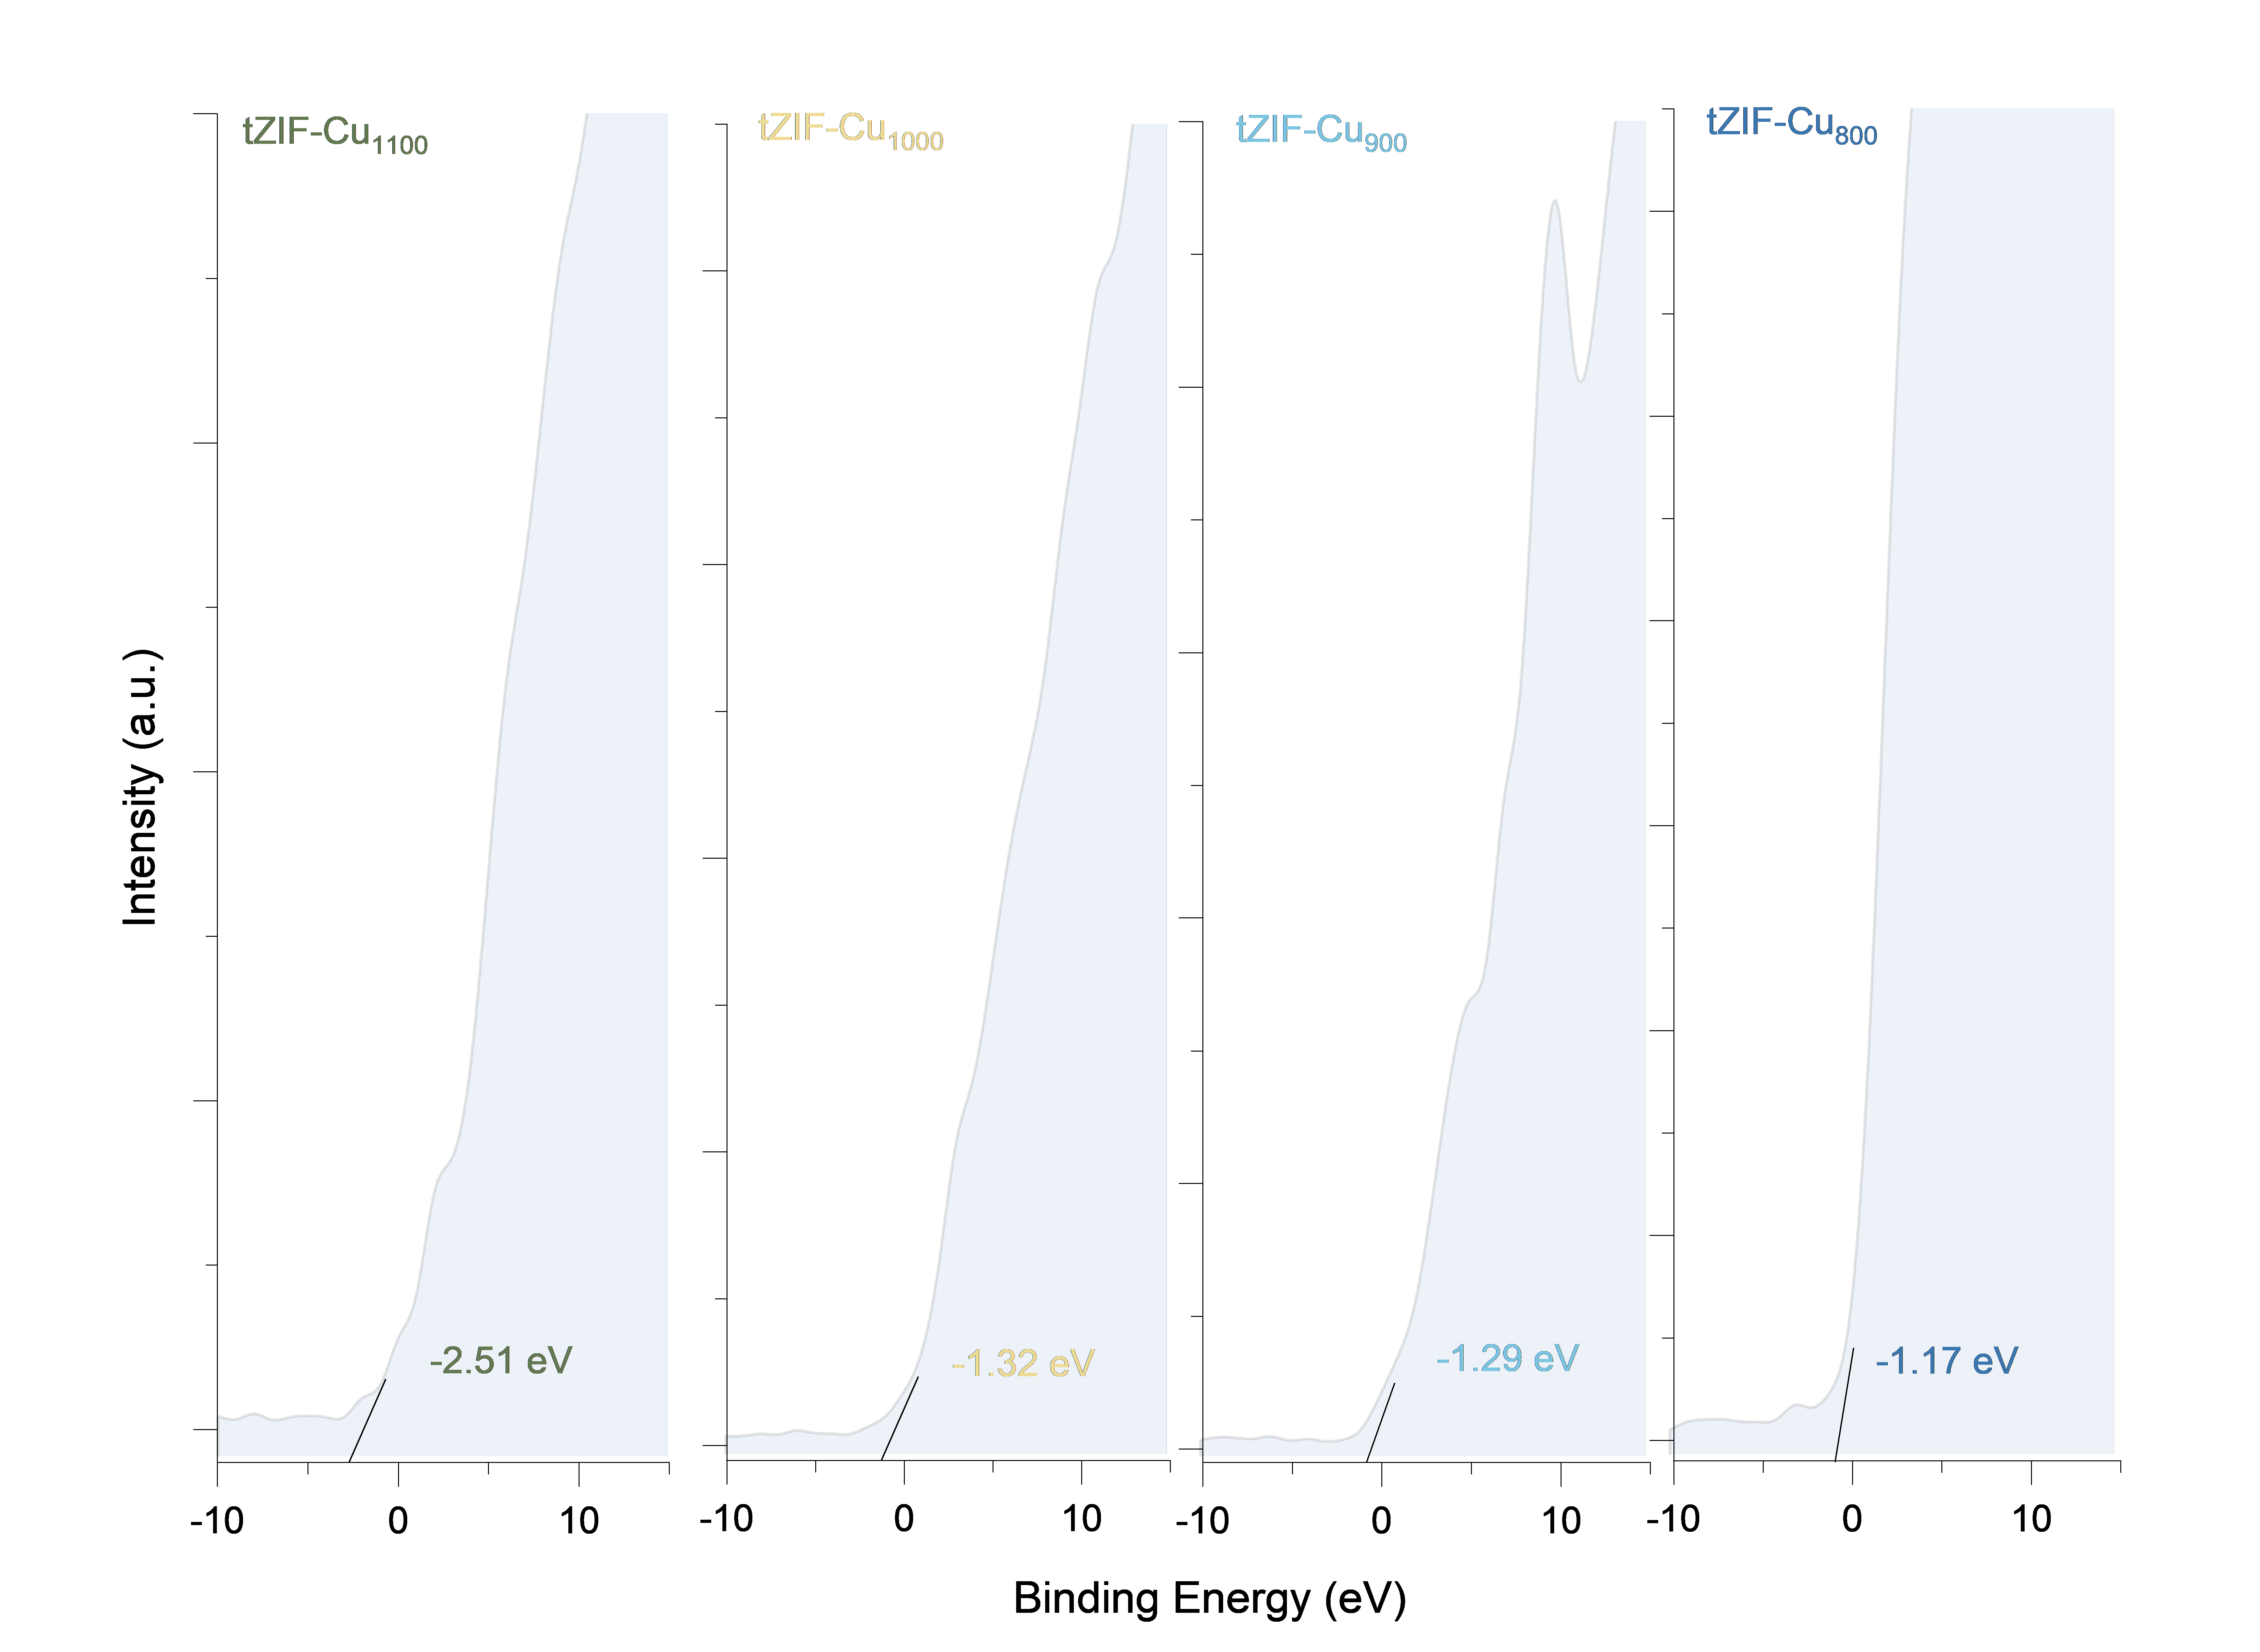


**Supplementary Fig. 47**. Secondary electron cutoff edge spectra from X-ray photoelectron spectroscopy (XPS) of tZIF-Cu800, tZIF-Cu900, tZIF-Cu1000 and tZIF-Cu1100, showing the work function evolution of the catalysts.

**XPS cutoff edge and d-band center up-shift:** XPS secondary electron cutoff edge measurements (Supplementary Fig. 47) provide direct experimental evidence for the nanoconfinement-induced upshift of the Cu d-band center, showing excellent consistency with DFT-calculated d-band center positions and confined electric field intensities. The cutoff edge binding energy increases continuously from –2.51 eV for tZIF-Cu1100 to –1.17 eV for tZIF-Cu800, corresponding to a gradual decrease in work function. tZIF-Cu900 exhibits a significantly lower work function than tZIF-Cu1000 and tZIF-Cu1100, which is fully consistent with the upshift of the Cu d-band center from –3.36 eV to –1.85 eV revealed by DFT calculations. This trend is further supported by Cu 2p XPS and Cu K-edge XANES results that confirm the increased Cu oxidation state. The cutoff edge shift shows a strong positive correlation with urea electrosynthesis performance, bridging atomic-scale electronic structure calculations and macroscopic catalytic performance, and completing the evidence chain for the structure-activity relationship of nanoconfined catalysts.

**Calculation of confinement metric descriptor (CMD):** The CMD was established to quantitatively correlate the nanoconfinement effect of the cavity structure with electrocatalytic urea synthesis performance, with a two-tier calculation framework derived entirely from the experimental characterization and first-principles calculation results in this work. The intrinsic CMD for a single ideal cavity model with a fixed diameter () is defined as

where is the average confined electric field intensity of the corresponding cavity, with values of 5.28 V·Å–1, 4.09 V·Å–1, 3.05 V·Å–1 and 2.86 V·Å–1 for cavities with central diameters of 1.0 nm, 1.5 nm, 1.8 nm and 2.6 nm respectively; is the reference electrostatic field of non-confined planar Cu–N4 sites for normalization, set to a widely accepted benchmark value of 0.52 V Å–1 for carbon-based single-atom Cu–N4 catalysts; is the upshift amplitude of the Cu d-band center relative to the non-confined 2.6 nm reference state, with values of 1.51 eV, 1.43 eV, 0.06 eV and 0.00 eV for the 1.0 nm, 1.5 nm, 1.8 nm and 2.6 nm cavities respectively, derived from projected density of states calculations in this work; is the maximum upshift amplitude of the Cu d-band center for normalization, set to the maximum measured value of 1.51 eV in this work; is the steric hindrance correction factor ranging from 0 to 1, which quantifies the comprehensive confinement efficiency of the cavity as the product of the reactant accessibility factor *α*i and the intermediate confinement matching factor *β*i, with the explicit expression:

where *d* is the central diameter of the cavity in nanometers, is set to 0 when *d* < 1.26 nm (twice the kinetic diameter of hydrated nitrate anions, 0.63 nm) where reactant diffusion is completely blocked, and set to 1 when *d* ≥ 1.26 nm where unimpeded reactant diffusion is allowed, and the Gaussian term describes the retention efficiency of key *CO and *NO intermediates with a maximum value of 1 at the optimal 1.8 nm cavity identified by molecular dynamics simulations; the calculated values are 0, 0.755, 1.00 and 0.10 for the 1.0 nm, 1.5 nm, 1.8 nm and 2.6 nm cavities respectively. The weighted average CMD for the as-prepared bulk catalysts (CMDa) is defined as:

where is the weighting factor representing the fraction of effective Cu–N4 active sites anchored on the inner wall of the corresponding cavity, derived from the pore size distribution integrated with 1.0 nm, 1.5 nm, 1.8 nm and 2.6 nm as the central diameters, combined with pyridinic N content and pore connectivity characterization results; the values for tZIF-Cu800 are 0.40, 0.36, 0.23 and 0.01 for the 1.0 nm, 1.5 nm, 1.8 nm and 2.6 nm cavities respectively, with corresponding values of 0.35, 0.33, 0.26 and 0.06 for tZIF-Cu900, 0.28, 0.24, 0.20 and 0.28 for tZIF-Cu1000, and 0.24, 0.22, 0.22 and 0.32 for tZIF-Cu1100.

The intrinsic values for each single cavity model were first calculated via the aforementioned formula, yielding values of 0 for the 1.0 nm cavity, 11.56 for the 1.5 nm cavity, 11.73 for the 1.8 nm cavity, and 0.55 for the 2.6 nm cavity. The weighted average for each catalyst was subsequently obtained via linear superposition of the intrinsic values weighted by the corresponding active site fraction fi, with the final calculated values of 8.18 for tZIF-Cu800, 9.64 for tZIF-Cu900, 6.82 for tZIF-Cu1000, and 4.57 for tZIF-Cu1100. The calculated values show a strict positive correlation with the urea electrosynthesis performance of the catalyst series, with tZIF-Cu900 exhibiting the highest value corresponding to its record-high urea yield rate and near-unity Faradaic efficiency, while the gradual decline in for tZIF-Cu1000 and tZIF-Cu1100 is consistent with the significant degradation of catalytic performance caused by the loss of effective confinement pores and framework collapse. This quantitative calculation framework fully reproduces the structure-activity relationship between the nanoconfined cavity structure and catalytic performance, with all parameters derived directly from experimental and computational results in this work, ensuring the reproducibility and reliability of the CMD model.


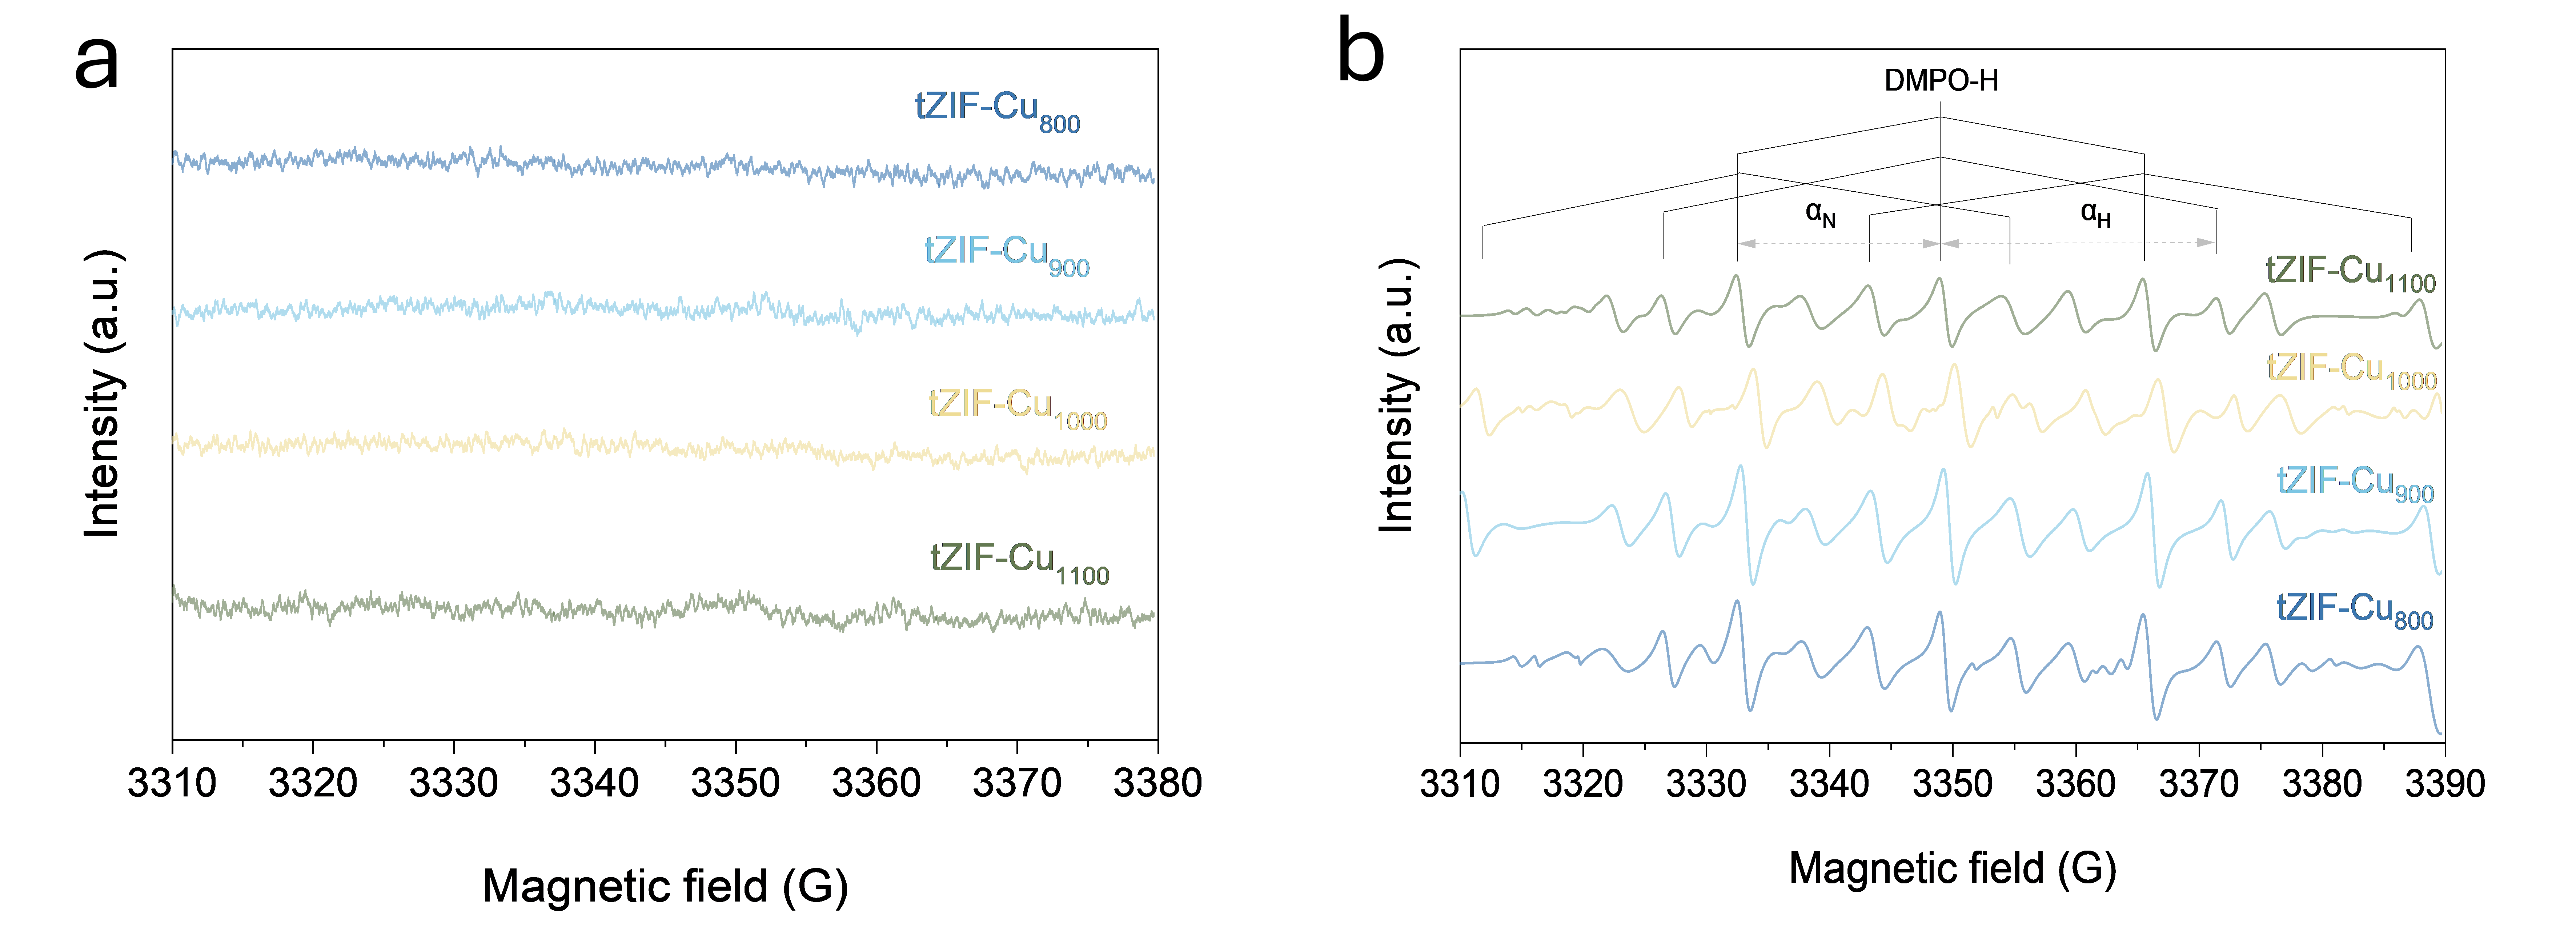


**Supplementary Fig. 48**. Electron paramagnetic resonance (EPR) spectra of DMPO-trapped hydrogen radicals (H·) during electrolysis: (a) at open circuit potential (0 V vs. RHE), (b) at –0.7 V vs. RHE. The spin trapping agent DMPO was used for H· capture.


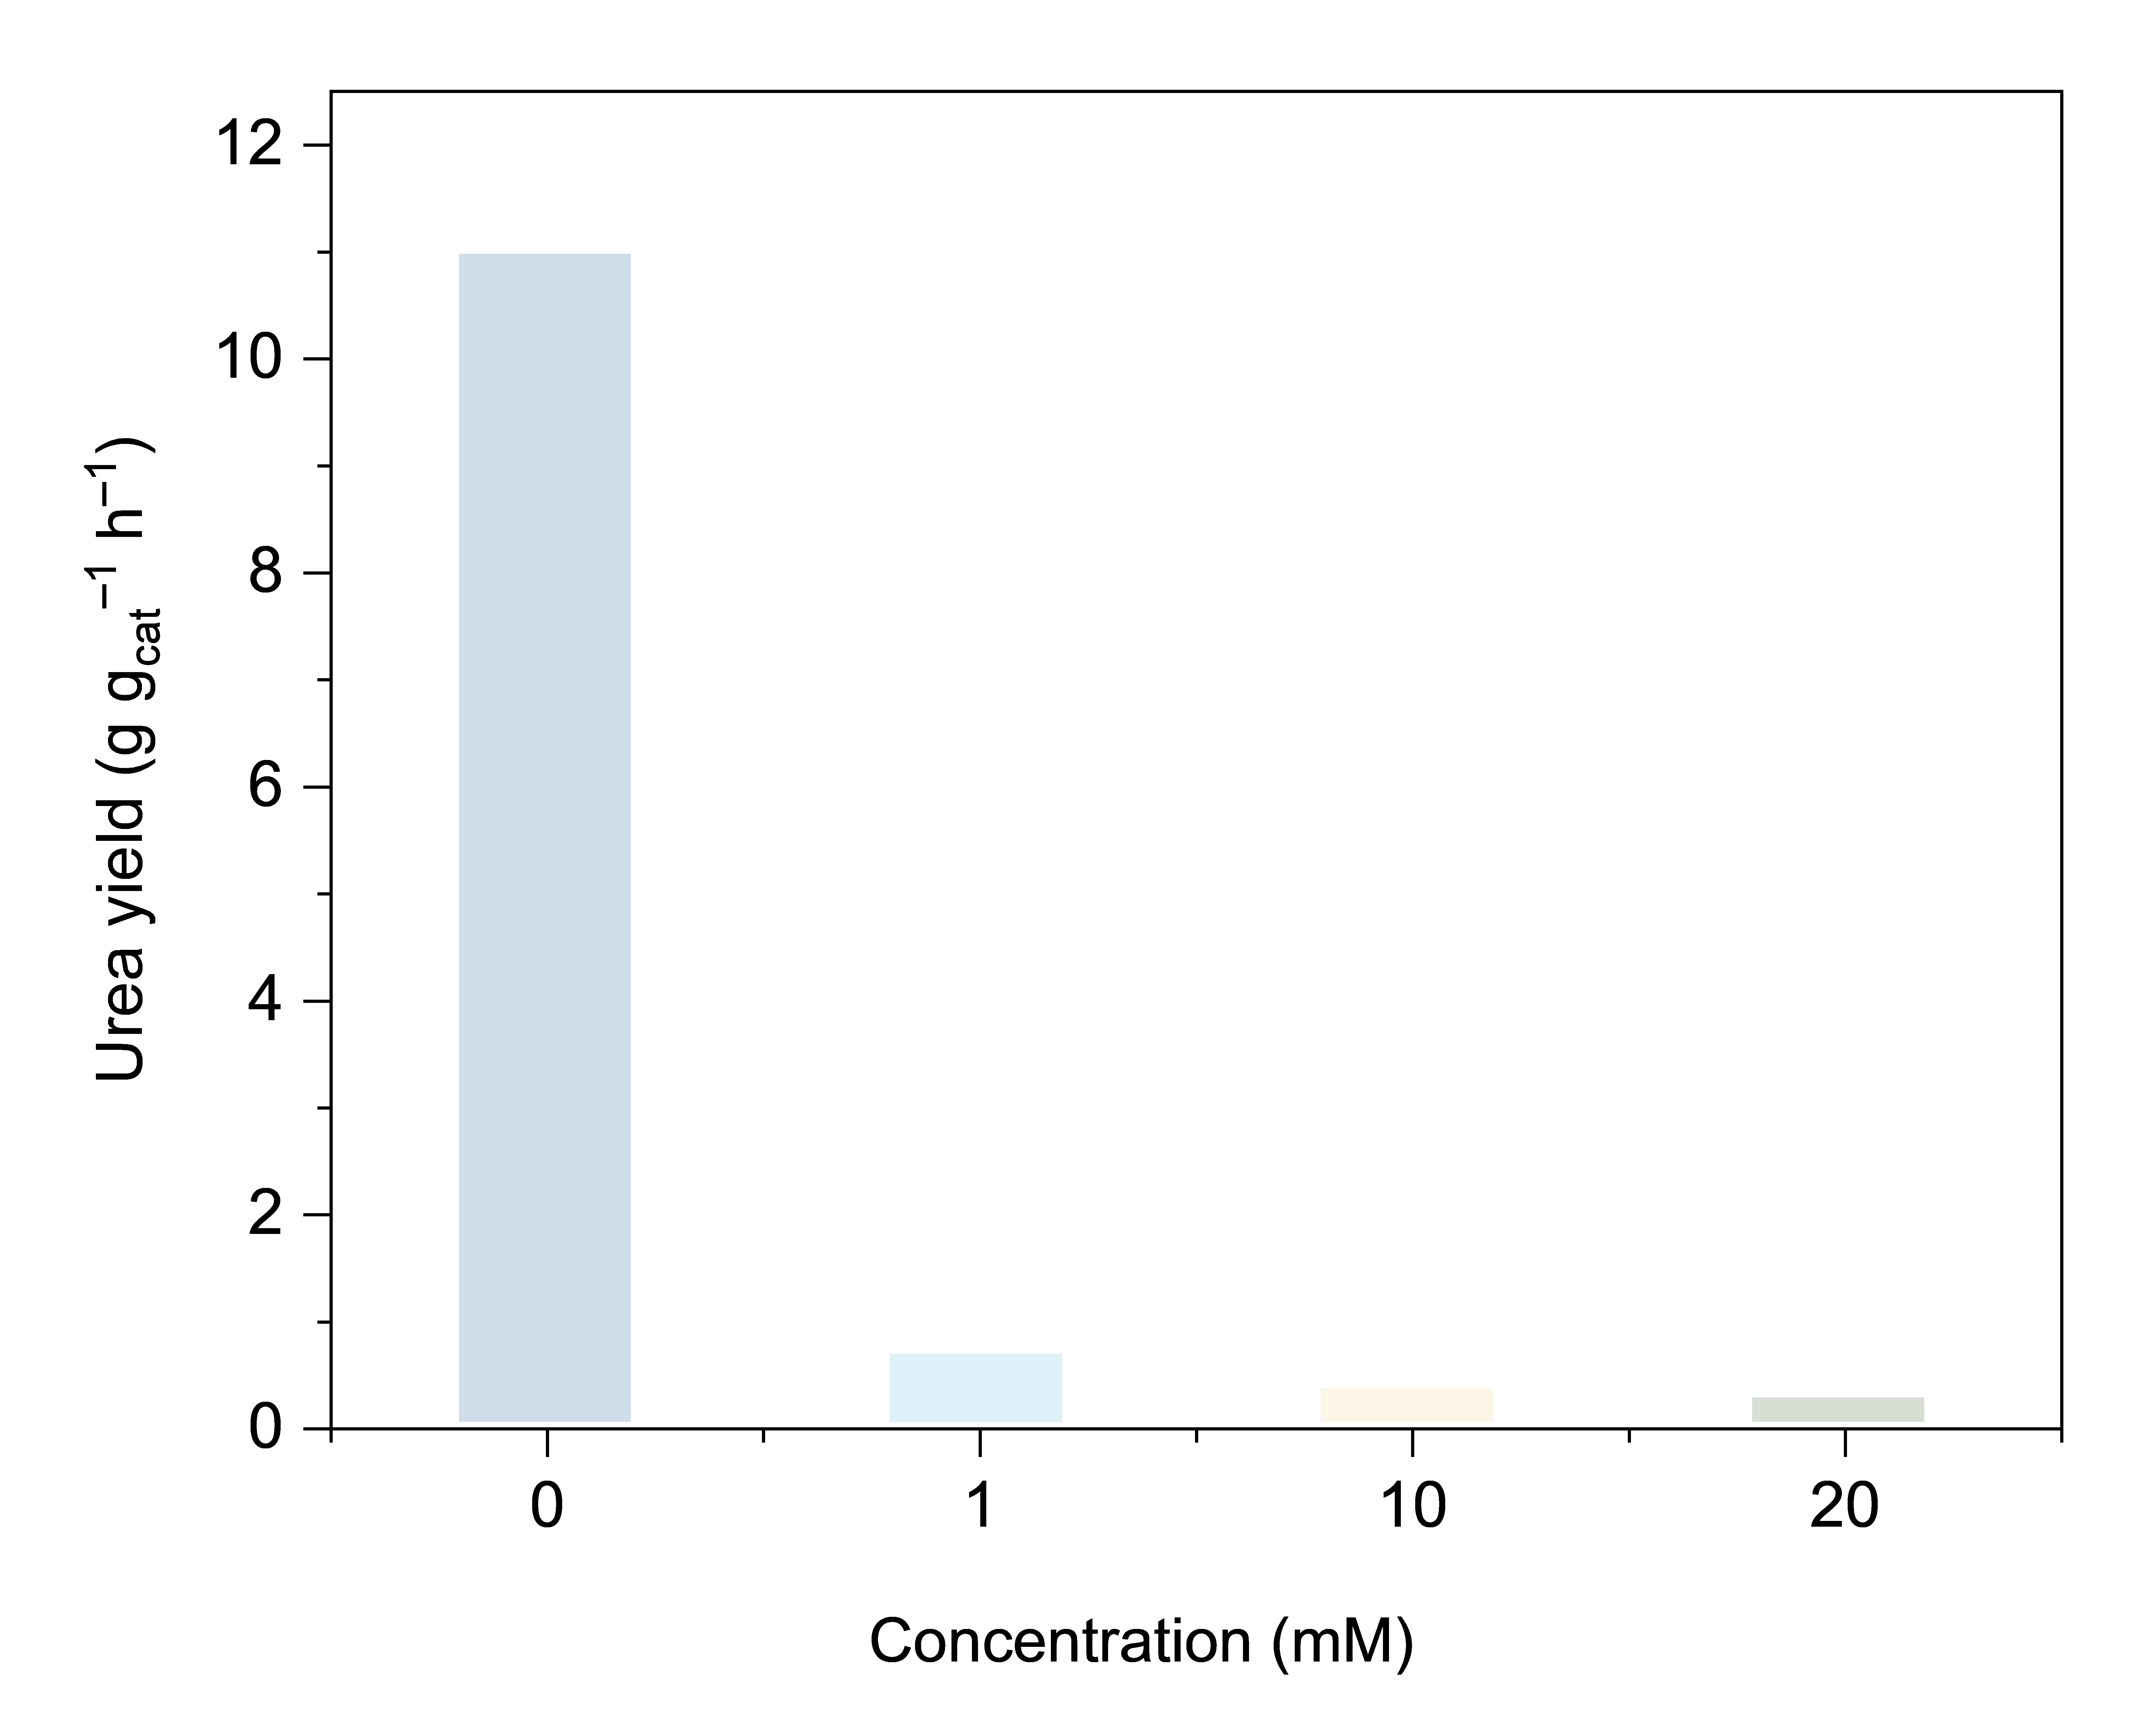


**Supplementary Fig. 49**. Effect of tert-butyl alcohol (TBA) concentration on the urea yield rate over tZIF-Cu900 at –0.7 V vs. RHE.

**EPR analysis of hydrogen radical generation:** EPR spectroscopy with 5,5-dimethyl-1-pyrroline *N*-oxide (DMPO) as the spin trapping agent (Supplementary Fig. 48) provides direct evidence for hydrogen radical (H·) generation during the electrocatalytic co-reduction of CO2 and NO3⁻, and reveals the critical regulatory role of the nanoconfined cavity on H· generation and utilization, which is closely linked to the selective suppression of the hydrogen evolution reaction (HER) and the promotion of C–N coupling. EPR spectra were collected during electrolysis at –0.7 V vs. RHE in CO2-saturated 0.1 M KHCO3 + 0.1 M KNO3 electrolyte, with DMPO added to trap short-lived H· radicals. The stable DMPO-H spin adduct formed in this process gives a characteristic four-line EPR signal with an intensity ratio of 1:2:2:1, hyperfine coupling constants of αN = 16.3 G and αH = 22.4 G, which is consistent with standard spectral parameters for DMPO-H57.

All tZIF-Cus exhibit the characteristic DMPO-H signal, with signal intensity varying significantly. Specifically, the DMPO-H signal intensity of tZIF-Cu900 is 2.3 times higher than that of tZIF-Cu1100, 1.8 times higher than that of tZIF-Cu1000, and 1.2 times higher than that of tZIF-Cu800, indicating that tZIF-Cu900 generated the highest concentration of H· radicals during electrolysis. This significant enhancement of H· generation on tZIF-Cu900 is attributed to the strong localized confined electric field in the 1.8 nm nanocavity, which promotes single-electron transfer reduction of protons to H· radicals, while the size-matched cavity concentrates the generated H· radicals near the active sites via spatial confinement and prevents their rapid diffusion into the bulk electrolyte.

The high concentration of H· radicals in the nanoconfined cavity plays a dual role in regulating reaction selectivity and activity, which explains the superior performance of tZIF-Cu900. First, confined H· radicals act as the active hydrogenation species for the sequential hydrogenation of C–N coupling intermediates (*CONO, *CONHO, *CONH2, etc.), a necessary step for urea formation. The high concentration of H· radicals in the cavity accelerates the hydrogenation of C–N coupling intermediates, lowering the overall reaction energy barrier and increasing the urea yield rate. This was further confirmed by tert-butyl alcohol (TBA) quenching experiments (Supplementary Fig. 49), where the urea yield rate decreased by 92% with the addition of 20 mM TBA, directly proving that H· radicals are the key reactive species for urea synthesis rather than reaction by-products.

Besides, the nanoconfined cavity kinetically steers H· radicals towards the desired hydrogenation of C–N intermediates rather than the parasitic HER. The restricted volume of the 1.8 nm cavity imposes a severe steric penalty on the bimolecular combination of two H· radicals to form H2, the rate-determining step for HER. In contrast, the reaction between H· radicals and pre-adsorbed *NO/*CONO intermediates is subject to negligible steric hindrance within the confined cavity. As a result, even though tZIF-Cu900 generated a 2.3-fold higher concentration of H· radicals than tZIF-Cu1100, its HER Faradaic efficiency was only 3.2% at –0.7 V vs. RHE. This indicates that the nanoconfined cavity effectively suppresses HER by inhibiting bimolecular H· combination, while directing H· radicals towards the target hydrogenation reaction for urea synthesis.

These EPR results reveal a previously unrecognized mechanism for nanoconfinement-enhanced C–N coupling: the confined cavity not only modulates the d-band center of the Cu active site and enriches *CO/*NO intermediates, but also generates and concentrates H· radicals, and kinetically regulates their reaction pathway to promote urea synthesis while suppressing HER. This provides new mechanistic insight into the selectivity regulation of electrocatalytic C–N coupling reactions, and explains why tZIF-Cu900 achieves near-unity urea selectivity despite the high concentration of H· radicals.

**Section 4.3. Temperature programmed desorption and in-situ spectroscopy**

**Intermediate identification via controlled feed experiments**: A series of controlled orthogonal feed experiments were performed to identify the key intermediate species involved in the C–N coupling reaction for urea synthesis, with the results presented in Fig. 4c of the main text, providing definitive evidence that *NO and *CO are the primary reactive intermediates for urea formation. The experiments were designed to systematically test the urea production activity of tZIF-Cu900 with different combinations of carbon and nitrogen feedstocks, all performed at –0.7 V vs. RHE in 0.1 M KHCO3 electrolyte, with the product distribution quantified via UV-vis spectroscopy and NMR.

First, when only a single carbon source (CO2, HCOOH, HCHO, CH3OH, or CO) or a single nitrogen source (NO3⁻, NO2⁻, NO, NH2OH, HCONH2, or NH4+) was supplied to the electrolysis system, no detectable urea was produced in any of the single-feed experiments. This confirms that urea synthesis requires the co-presence of both carbon and nitrogen sources, and that urea cannot be formed via the coupling of a single reactant with electrolyte impurities or the catalyst itself, ruling out non-specific background signals.

When paired carbon and nitrogen feedstocks were supplied, a clear hierarchy of urea production activity was observed, which directly reveals the reaction pathway and key intermediates. For the nitrogen source, when paired with CO2 as the carbon source, the urea yield rate follows the order: NO3⁻ > NO2⁻ > NO > NH2OH > HCONH2 > NH4⁺. The highest urea yield is achieved with NO3⁻ as the nitrogen source, followed by NO2⁻ and NO, while NH4⁺ as the nitrogen source produces almost no urea. This indicates that the nitrogen-containing species must be in an intermediate oxidation state between +5 (NO3⁻) and –3 (NH4⁺) to participate in the C–N coupling reaction, with NO being the most reactive nitrogen-containing intermediate. For the carbon source, when paired with NO3⁻ as the nitrogen source, the urea yield rate follows the order: CO2 > HCOOH > CO > HCHO > CH3OH, with CO2 and CO producing the highest urea yield, while fully reduced CH3OH produces almost no urea. This confirms that the carbon-containing species must be in an oxidation state between +4 (CO2) and 0 (CH3OH), with CO being the key carbon-containing intermediate for C–N coupling.

Most critically, when CO (gas) and NO (dissolved in electrolyte) were directly supplied as the sole carbon and nitrogen sources, even though their concentration is much lower than that of CO2 and NO3⁻, tZIF-Cu900 produced urea with a Faradaic efficiency of 87.2% at –0.7 V vs. RHE, much close to the urea yield rate with CO2 and NO3⁻ as the feedstocks. This is the most direct evidence that *NO and *CO are the primary reactive intermediates for C–N coupling: the direct supply of gaseous CO and dissolved NO bypasses the multi-step reduction of CO2 to *CO and NO3⁻ to *NO, and still drives efficient urea synthesis, confirming that these two species are the core building blocks for the C-N bond formation.

In addition, when the electrolysis was performed with CO2 and NH2OH as the feedstocks, a moderate urea yield was observed, while no urea was produced with CO2 and NH4⁺. This confirms that the nitrogen-containing intermediate must have an N-O bond to participate in the C–N coupling reaction, and that the deep reduction of NO3⁻ to NH4⁺ is a parasitic side reaction that does not contribute to urea formation. These feed experiment results are fully consistent with the in-situ Raman and ATR-SEIRAS results, which detect the characteristic peaks of *COOH, *CO, *NO2, and *NO intermediates during the co-reduction of CO2 and NO3⁻. Collectively, these results establish the complete reaction pathway for urea synthesis: CO2 is reduced to *CO via a 2-electron transfer process, NO3⁻ is reduced to *NO via a 3-electron transfer process, and the bimolecular C–N coupling between *CO and *NO forms the *CONO intermediate, which undergoes sequential hydrogenation to form the final urea product.

**TPD analysis of intermediate adsorption properties**: The TPD curves of CO and NO for the tZIF-Cu series (Fig. 4d) reveal the unique adsorption properties of the optimal tZIF-Cu900 catalyst towards the two key C–N coupling intermediates, *CO and *NO, providing a mechanistic explanation for its superior reactivity and selectivity. The TPD profiles can be deconvoluted into two distinct desorption regions: the low-temperature region (50–200 °C) corresponds to the desorption of physically adsorbed or weakly chemically adsorbed CO and NO, while the high-temperature region (200–400 °C) corresponds to the desorption of strongly chemically adsorbed species, which are bound to the active sites via covalent bonds58,59.

For the NO TPD curves, all tZIF-Cu samples exhibit a dominant desorption peak in the low-temperature region (50–200 °C). tZIF-Cu900 shows the strongest low-temperature NO desorption peak, centered at 62.5 °C, with the integrated peak area 3.1 times that of tZIF-Cu800 and 79.3 times that of tZIF-Cu1100. This indicates that tZIF-Cu900 has the highest capacity for physical adsorption of NO, which is attributed to the size-matched nanoconfined cavity that enriches NO molecules near the active sites via the spatial confinement effect. In the high-temperature region (200–400 °C), tZIF-Cu800 and tZIF-Cu1100 exhibit desorption peaks, corresponding to the chemical adsorption of NO, where the N-O bond is dissociated and N is strongly bound to the Cu active sites. In contrast, tZIF-Cu900 shows almost no high-temperature NO desorption peak, with negligible integrated peak area in the 200–400 °C region.

For the CO TPD, a nearly identical trend is observed. tZIF-Cu900 exhibits the strongest low-temperature CO desorption peak centered at 98.7 °C, indicating a high physical adsorption capacity for CO. In the high-temperature region, tZIF-Cu800 and tZIF-Cu1100 show strong CO desorption peaks at 224 °C and 417 °C, respectively, corresponding to the strong chemical adsorption of CO via the formation of metal-carbon bonds, while tZIF-Cu900 shows only a very weak high-temperature desorption signal, with no significant strong chemical adsorption of CO.

The strong physical adsorption and weak chemical adsorption of both NO and CO intermediates over tZIF-Cu900 confers a decisive kinetic advantage for the bimolecular C–N coupling reaction. The strong physical adsorption of NO and CO, driven by the nanoconfinement effect, significantly increases the local concentration of the two key intermediates near the Cu–N4 active sites. The bimolecular C–N coupling reaction is a second-order reaction, whose rate is proportional to the product of the local concentrations of *CO and *NO; the 2–3 times higher local intermediate concentration on tZIF-Cu900 thus accelerates the C–N coupling rate by nearly an order of magnitude, which is the core reason for its ultra-high urea yield rate. Second, the weak chemical adsorption of NO and CO ensures that the two intermediates remain in an activated yet mobile state on the catalyst surface, with the N–O and C–O bonds preserved. This avoids the deep reduction or dissociation of the intermediates, which would lead to the formation of NH4⁺ and carbonaceous by-products, thus effectively suppressing the parasitic side reactions. In contrast, the strong chemical adsorption of NO and CO on tZIF-Cu800 and tZIF-Cu1100 leads to the dissociation of the N-O and C-O bonds, resulting in the deep reduction of NO3⁻ to NH4⁺ and CO2 to CH4, as well as the poisoning of the active sites by strongly bound atomic N and C, leading to low C–N coupling selectivity.

**In situ Raman spectroscopy** dynamically tracked active site and intermediate evolution during electrolysis (Fig. 4e)60-62. With increasingly negative potential, the characteristic peaks of Cu3(CO3)2(OH)2 diminished gradually, while the peaks assigned to Cu–OH intensified progressively63,64, indicating the potential-driven reconstruction of Cu active sites under reductive conditions. The characteristic peaks of key reaction intermediates, including *COOH, *NH2, *NO and *CO, are clearly resolved during electrolysis, with their intensities maximized at –0.7 V vs. RHE, consistent with the optimal catalytic performance for urea synthesis. A distinct peak centered at 1404.2 cm–1 emerges and reaches the maximum intensity at the optimal potential, which is assigned to the C–N stretching vibration of the coupling product. Additional characteristic signals in the range of 596–1401 cm–1 were detected, corresponding to the bending and stretching vibrations of the C–N–O moiety in the critical *CONO intermediate19. The synchronous evolution of these C–N–O related peaks with the 1404.2 cm–1 peak directly confirms the formation of C–N bond via the coupling of *CO and *NO intermediates, and validates the *CONO-mediated reaction pathway for urea synthesis61,62,65,66. The detection of these key coupling intermediates further demonstrates that the size-matched nanoconfined cavity enriches and stabilizes the reactive *CO and *NO species, enabling efficient bimolecular C–N coupling at the active sites.

**Operando attenuated total reflection surface-enhanced infrared absorption spectroscopy (ATR-SEIRAS)** was further performed to monitor the dynamic evolution of surface-adsorbed species during the co-reduction process, with spectra collected in the range of 1000–4000 cm–1 (Fig. 4f)67. Characteristic peaks at 1652 cm–1, 1510 cm–1 and 1730 cm–1 emerged and intensified with increasingly negative applied potential, which are assigned to the adsorbed *CO intermediate, *NH2CO species and the N–C–N stretching vibration of the final urea product, respectively. Notably, a distinct characteristic peak of the critical C–N coupling intermediate *CONO was detected at 1998 cm–1, directly demonstrating that the size-matched cavity enriches reactive species and facilitates C–N bond formation. Additional characteristic peaks are resolved to clarify the full reaction process and nanoconfinement effect. The peak at 2350 cm–1 corresponds to the asymmetric stretching vibration of CO2 molecules68, and its gradual intensification with negative potential confirms the enrichment of CO2 reactants in the nanoconfined cavity near the active sites, consistent with the molecular dynamics simulation results. The peak at 1414 cm–1 is assigned to the bending vibration of the *NH269 moiety in the *CONH2 intermediate, which corresponds to the sequential hydrogenation step of the C–N coupling product, validating the stepwise formation of urea via *CONO → *CONHO → *CONH2 pathway. The peak at 1162 cm–1 corresponds to the N–O stretching vibration69 of adsorbed *NO2 and *NO intermediates derived from NO3RR, whose intensity evolution matches well with that of the C–N coupling intermediates, confirming the synchronous generation of nitrogen-containing building blocks for C–N coupling.

**Section 4.4. Calculation of reaction energy barriers**

Reaction energy barriers calculations were performed using the VASP50,51 and focus on the intrinsic reaction thermodynamics and pathway of Cu–N4 sites, while the nanoconfinement effect identified experimentally serves to enhance intermediate adsorption, local field strength, and mass transport, as described in the main text.

The core-valence interactions were described by the projector-augmented wave (PAW) method70, and the cut-off energy was set to 450 eV. All spin-polarized calculations were performed by the GGA and PBE for the exchange and association of functions. The convergence criterion for the residual force and energy on atoms converged to less than 0.02 eV Å–1 and 10−5 eV, respectively. Reciprocal space was described by using the Monkhorst-Pack scheme to generate a 3 × 3 × 1 k points. The nudged elastic band (NEB) method was used for locating the transition states (TS).

The Gibbs free energy change (ΔG) of each reaction step was defined as:

where is the total energy difference calculated directly by DFT; the thermodynamic corrections of zero-point-energy (ZPE); is the entropy (S) derived from the vibrational partition function at 298.15 K (T).

Surface models of Cu–N4 were constructed based on the results from XANES and XPS tests. Cu–N3-C, and Cu–N2-C2 were also constructed for comparison. For all models, a 2 × 2 supercell with single atomic layers was employed. To prevent surface-surface interactions and minimize dipole effects, a vacuum region of 15 Å was added along the z-direction. the Gibbs free energy change (ΔG) of each reaction step was defined as:

where is the the total energy difference calculated directly by DFT; the thermodynamic corrections of zero-point-energy (ZPE); is the entropy (S) derived from the vibrational partition function at 298.15 K (T).


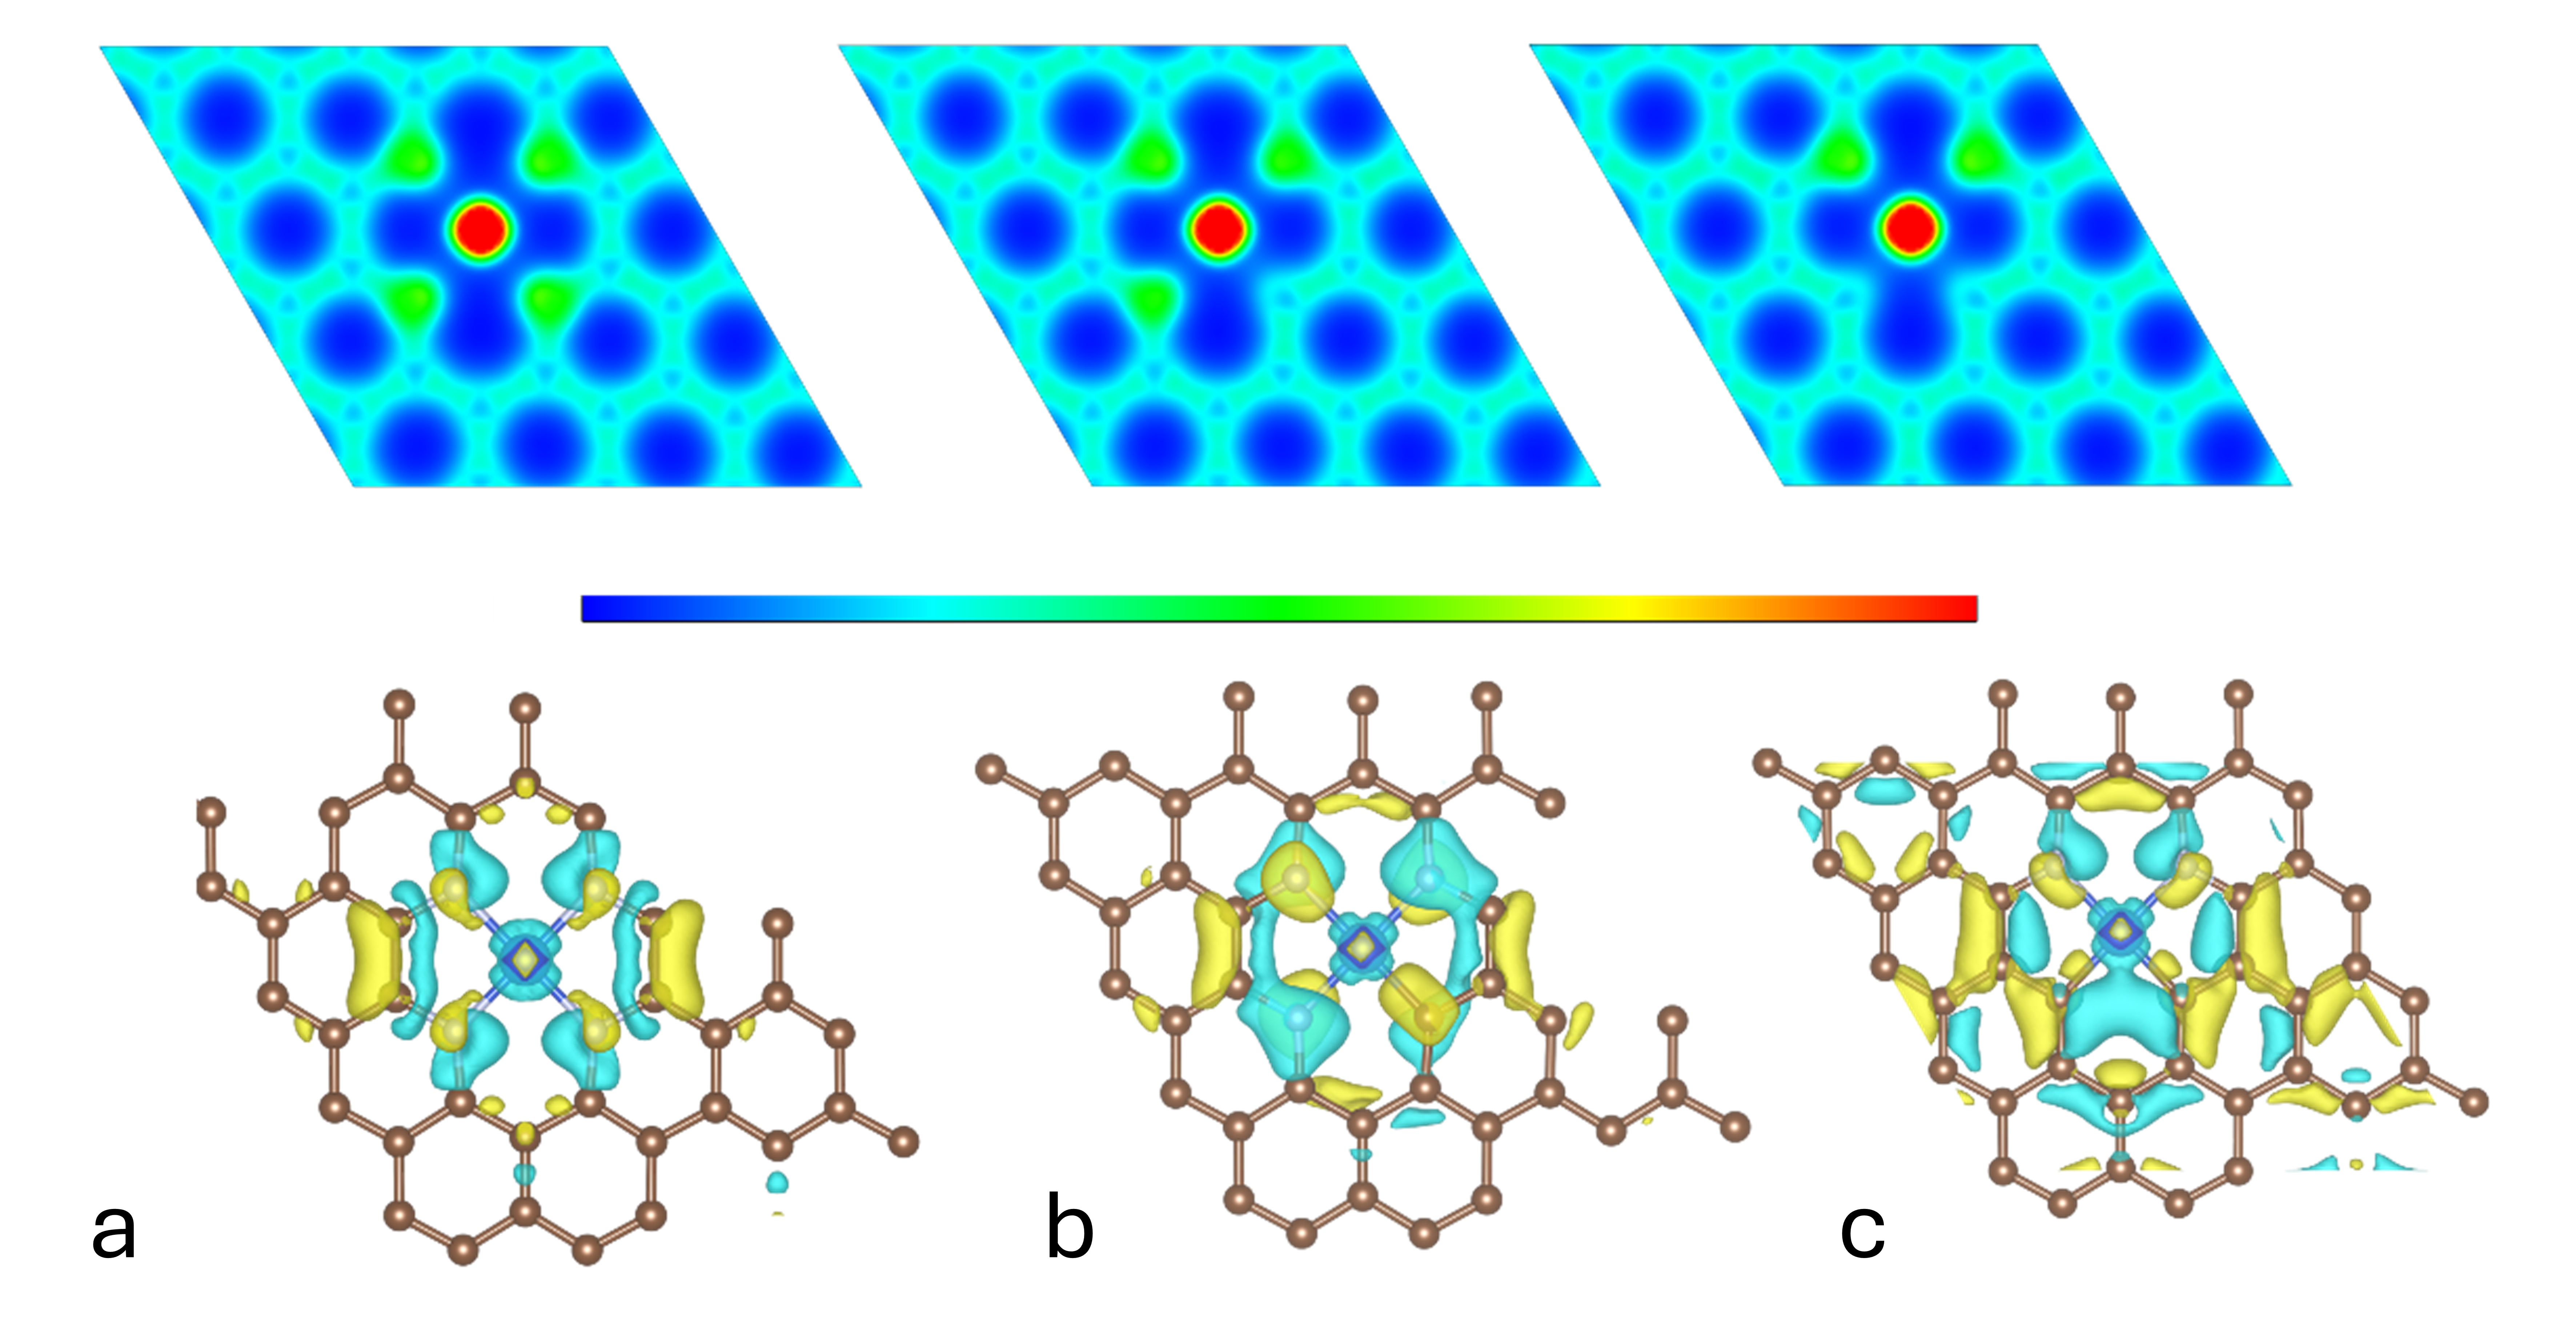


**Supplementary Fig. 50.** Charge densities and differential charge densities of (a) Cu–N4, (b) Cu–N3-C and (c) Cu–N2-C2.


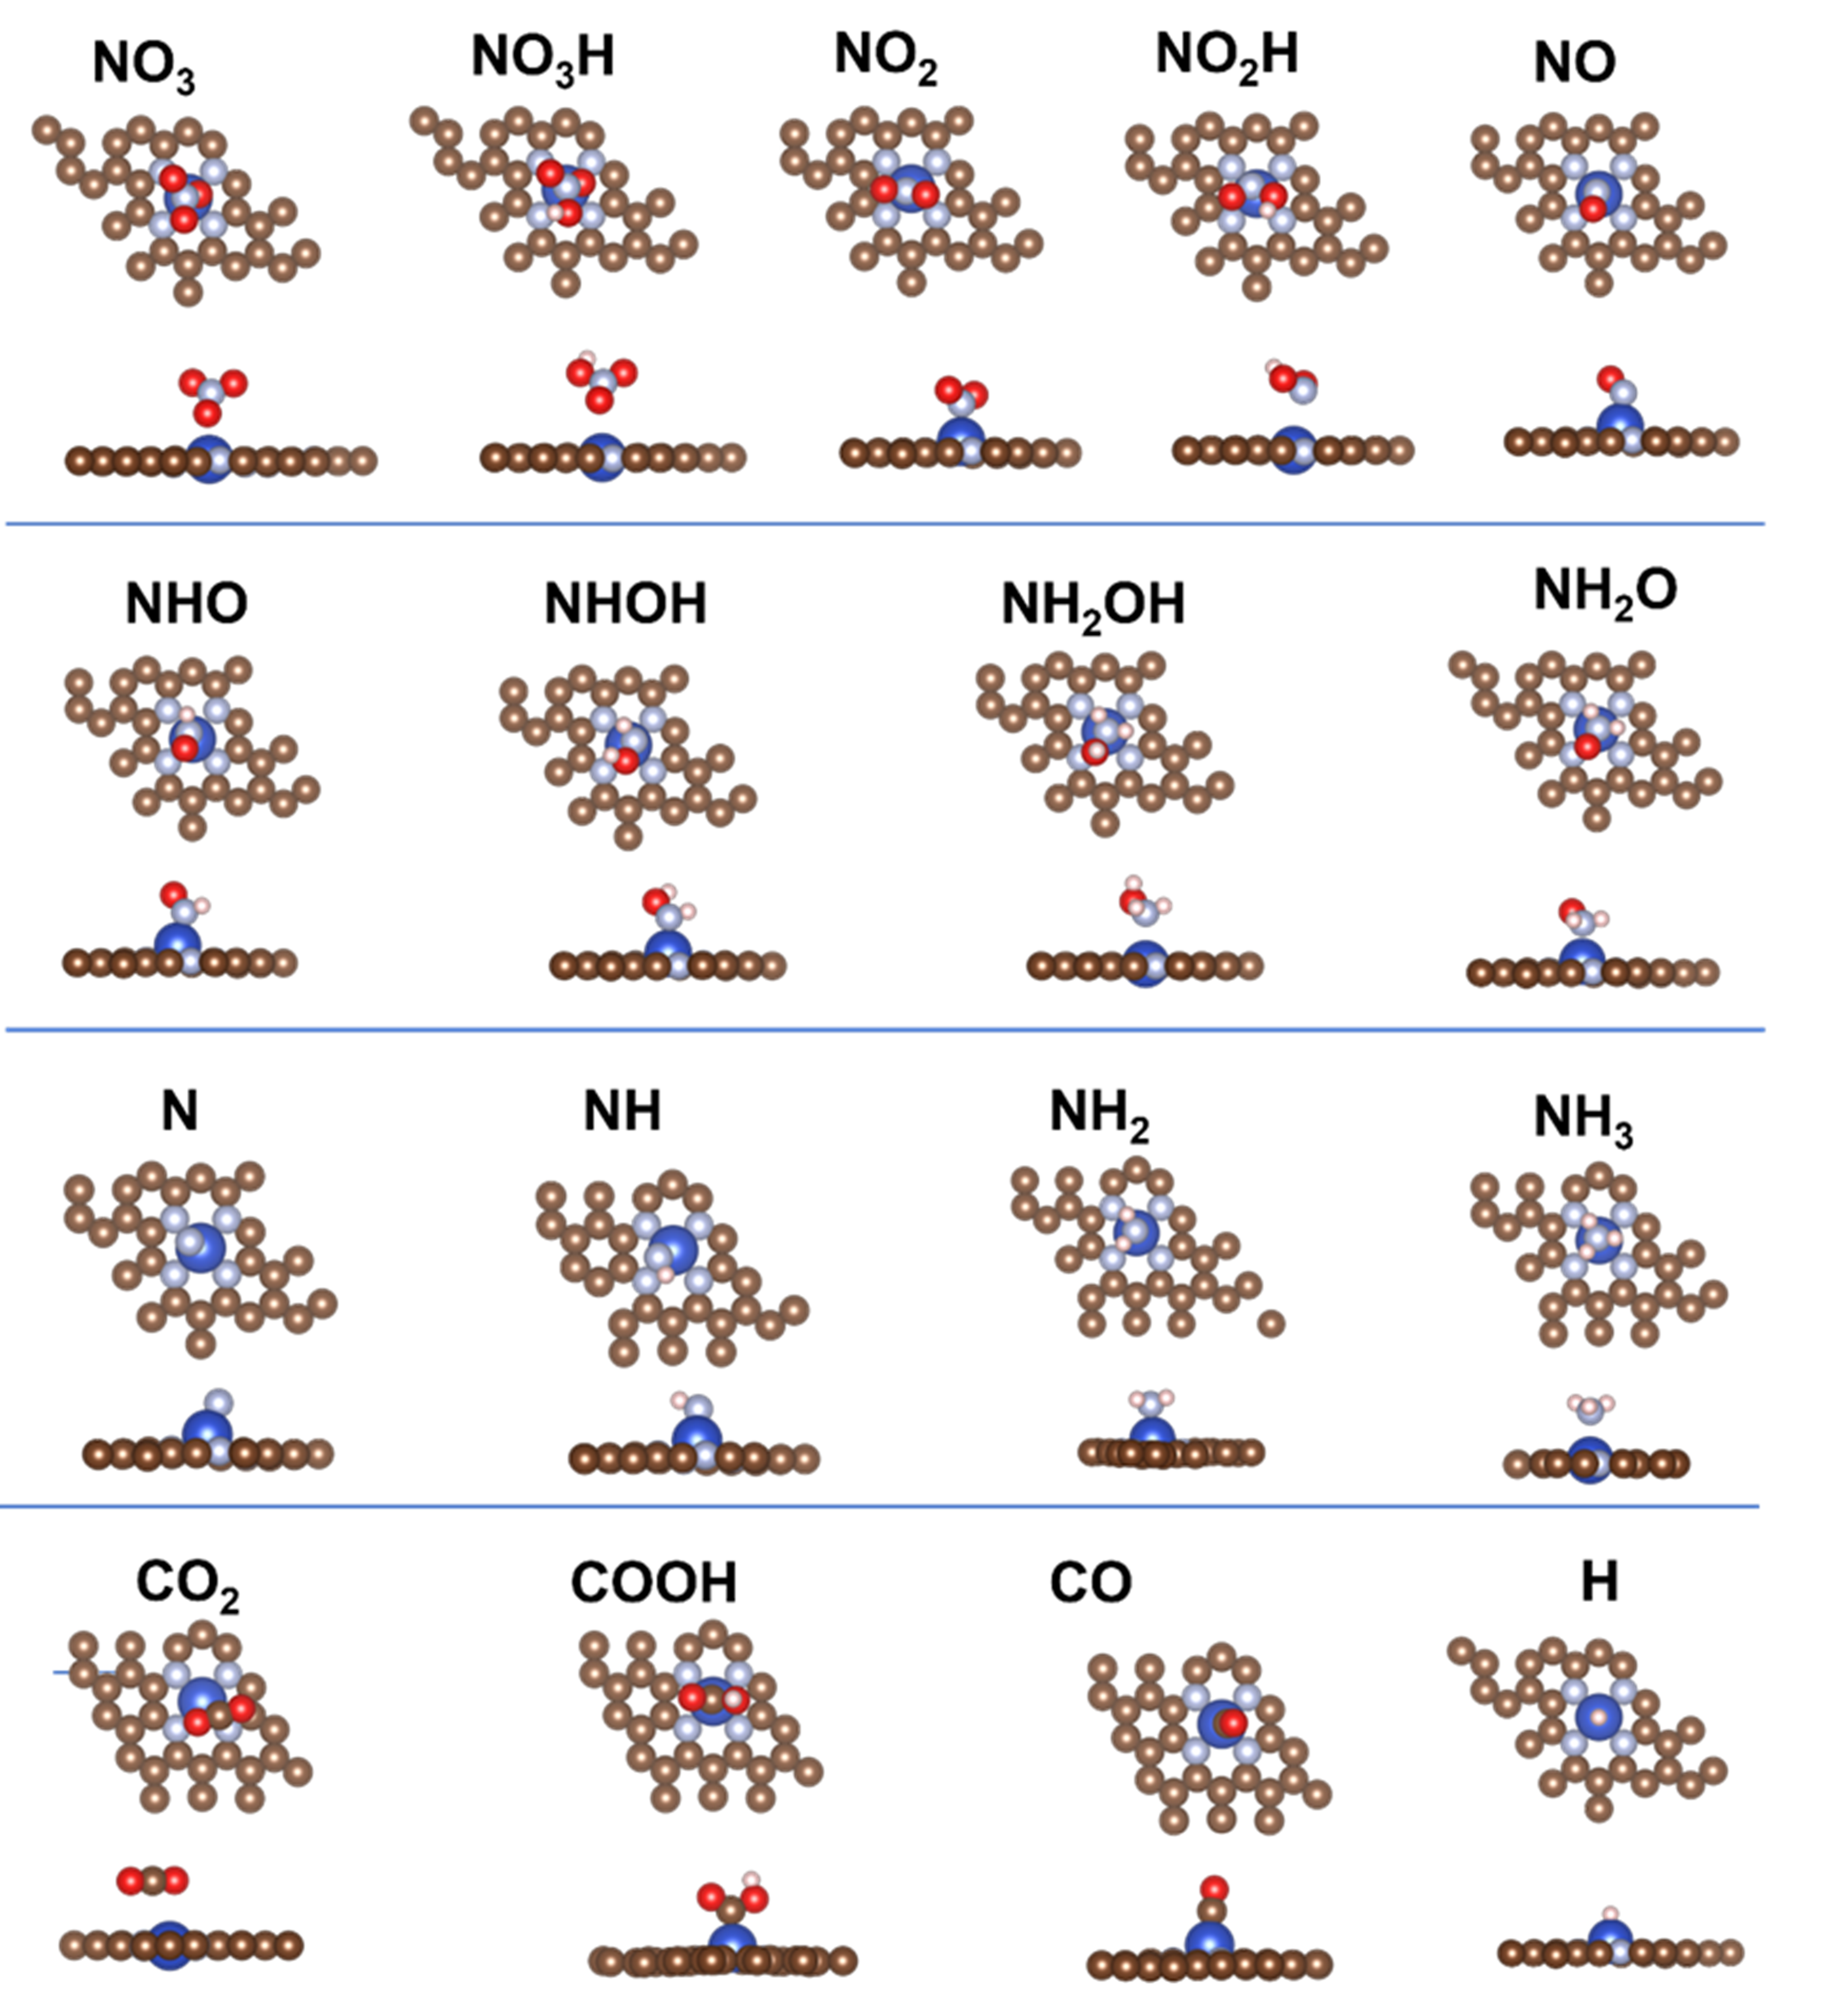


**Supplementary Fig. 51**. Optimized adsorption configurations of key species involved in NO3RR, CO2RR and HER on the modelled Cu–N4 site, calculated via DFT.


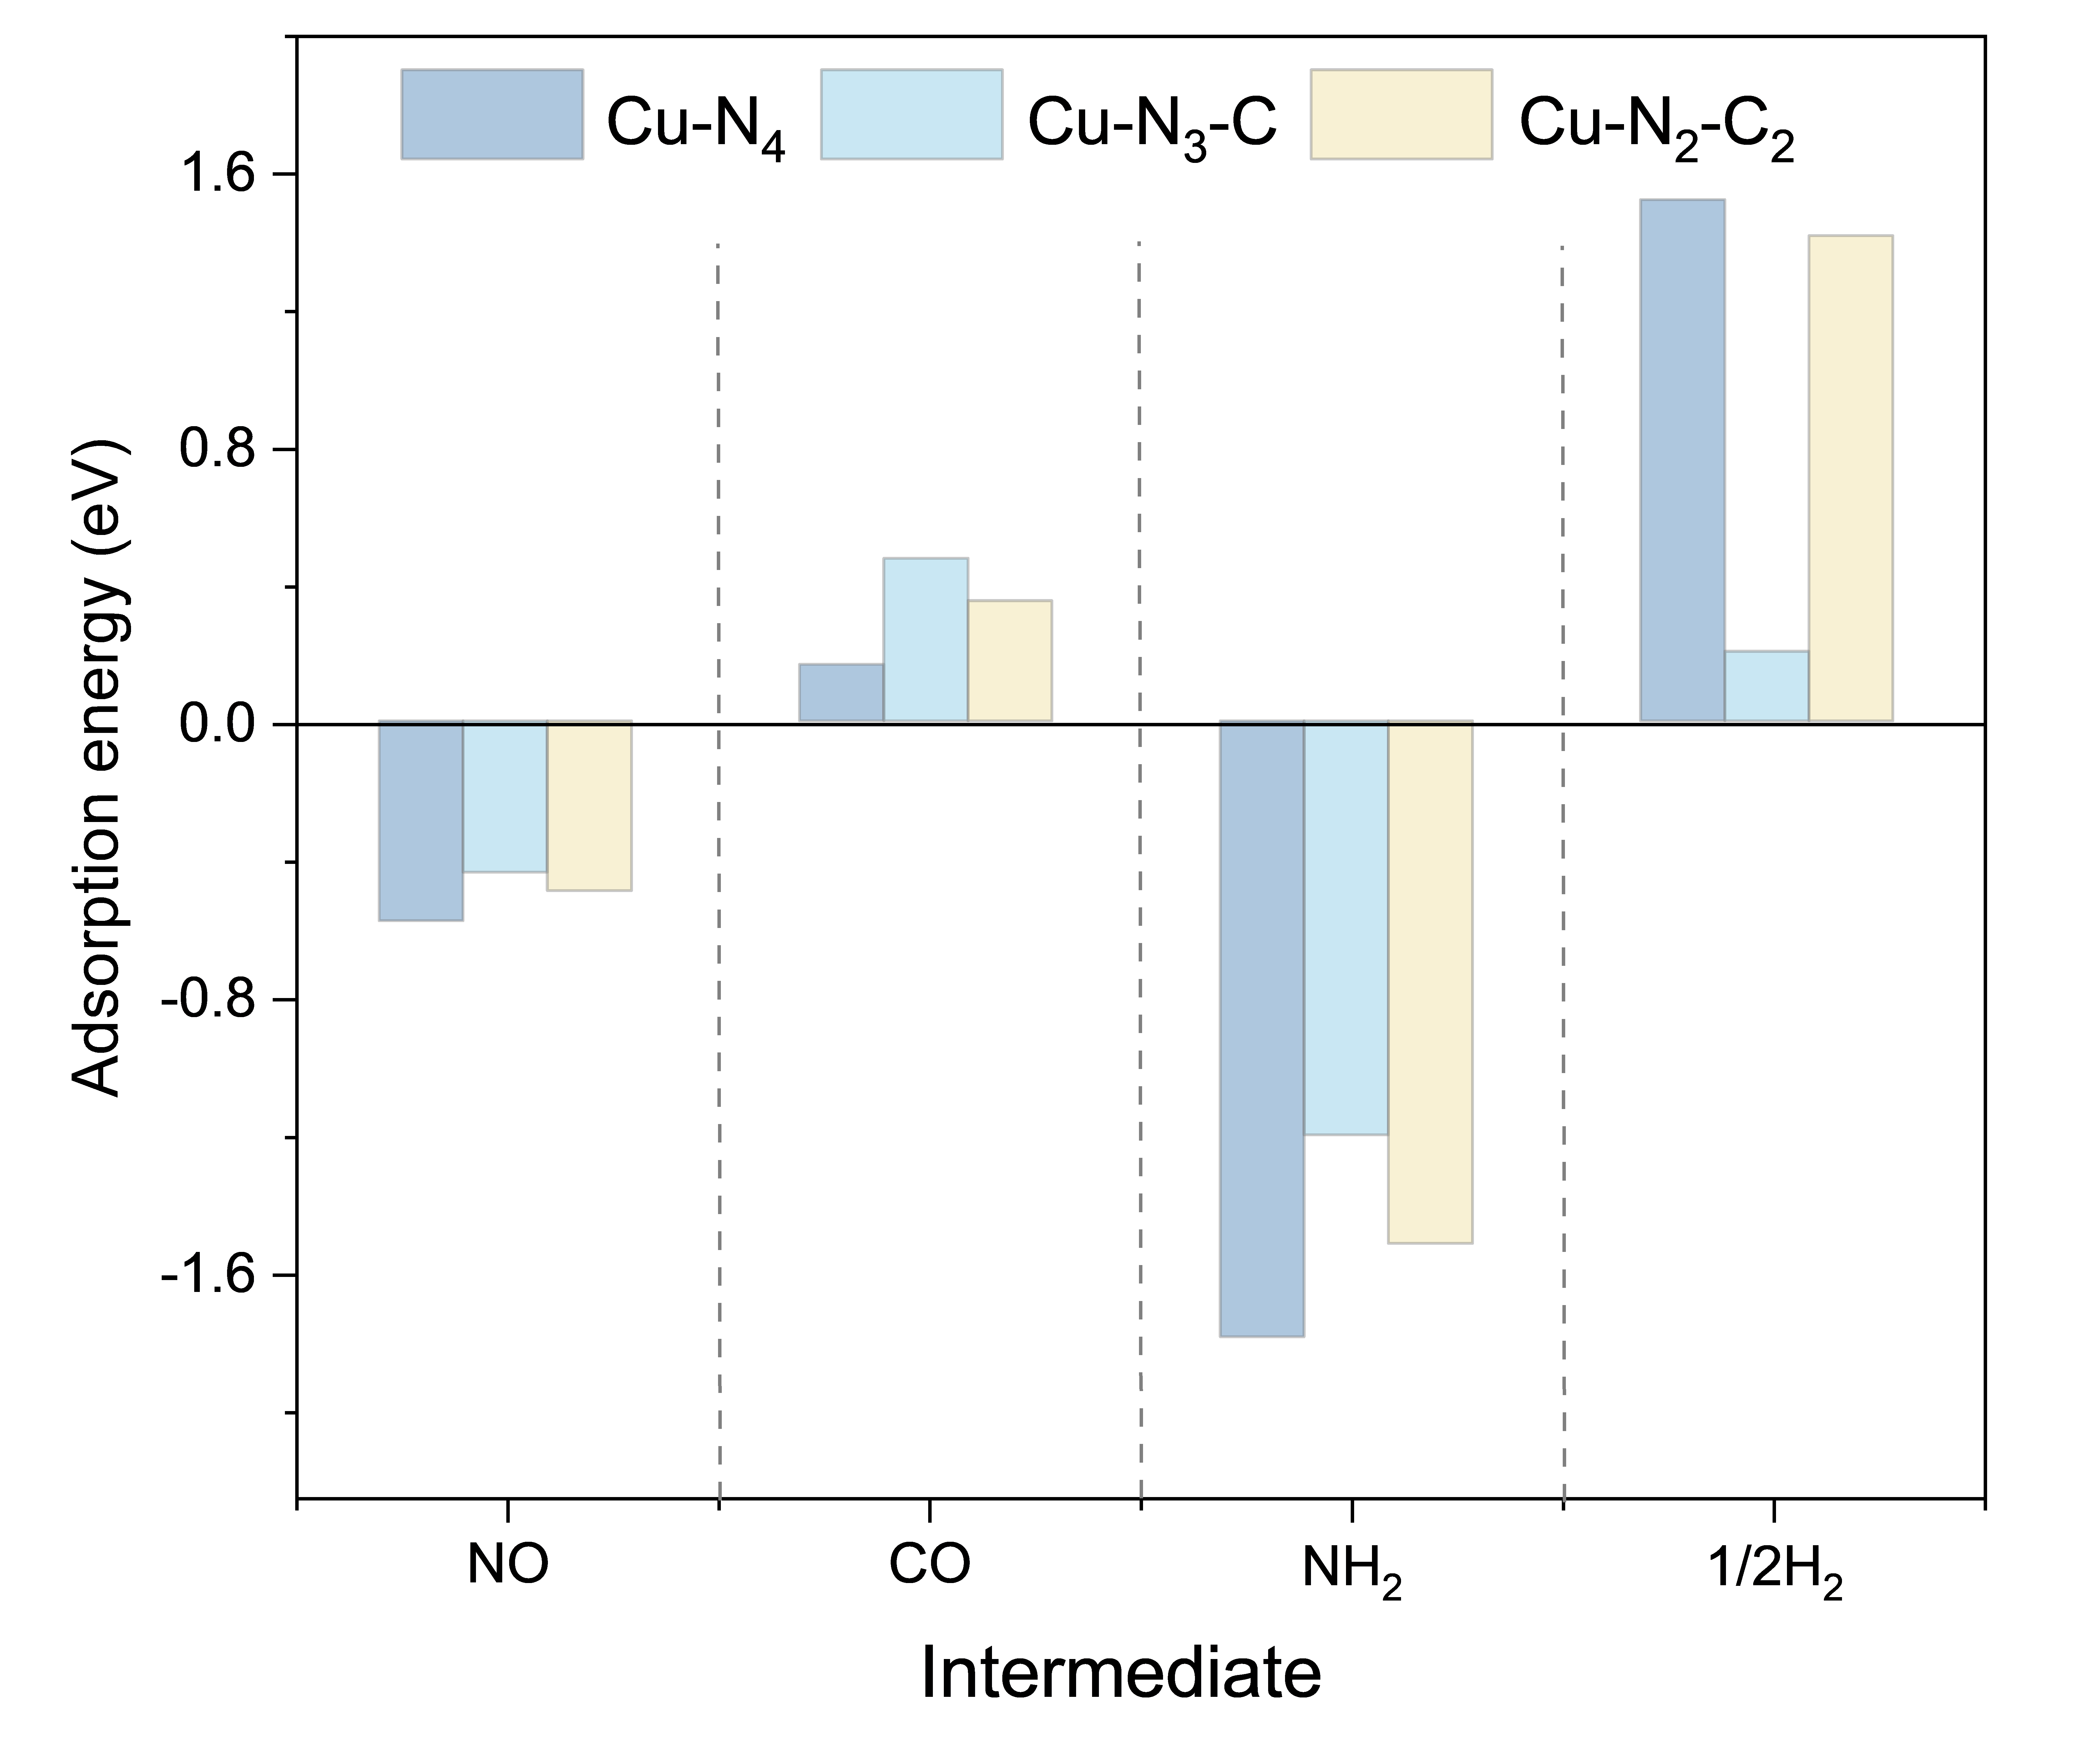


**Supplementary Fig. 52.** Adsorption energy changes of NO, CO, NH2, and H2 over Cu–N4, Cu–N3-C and Cu–N2-C2.


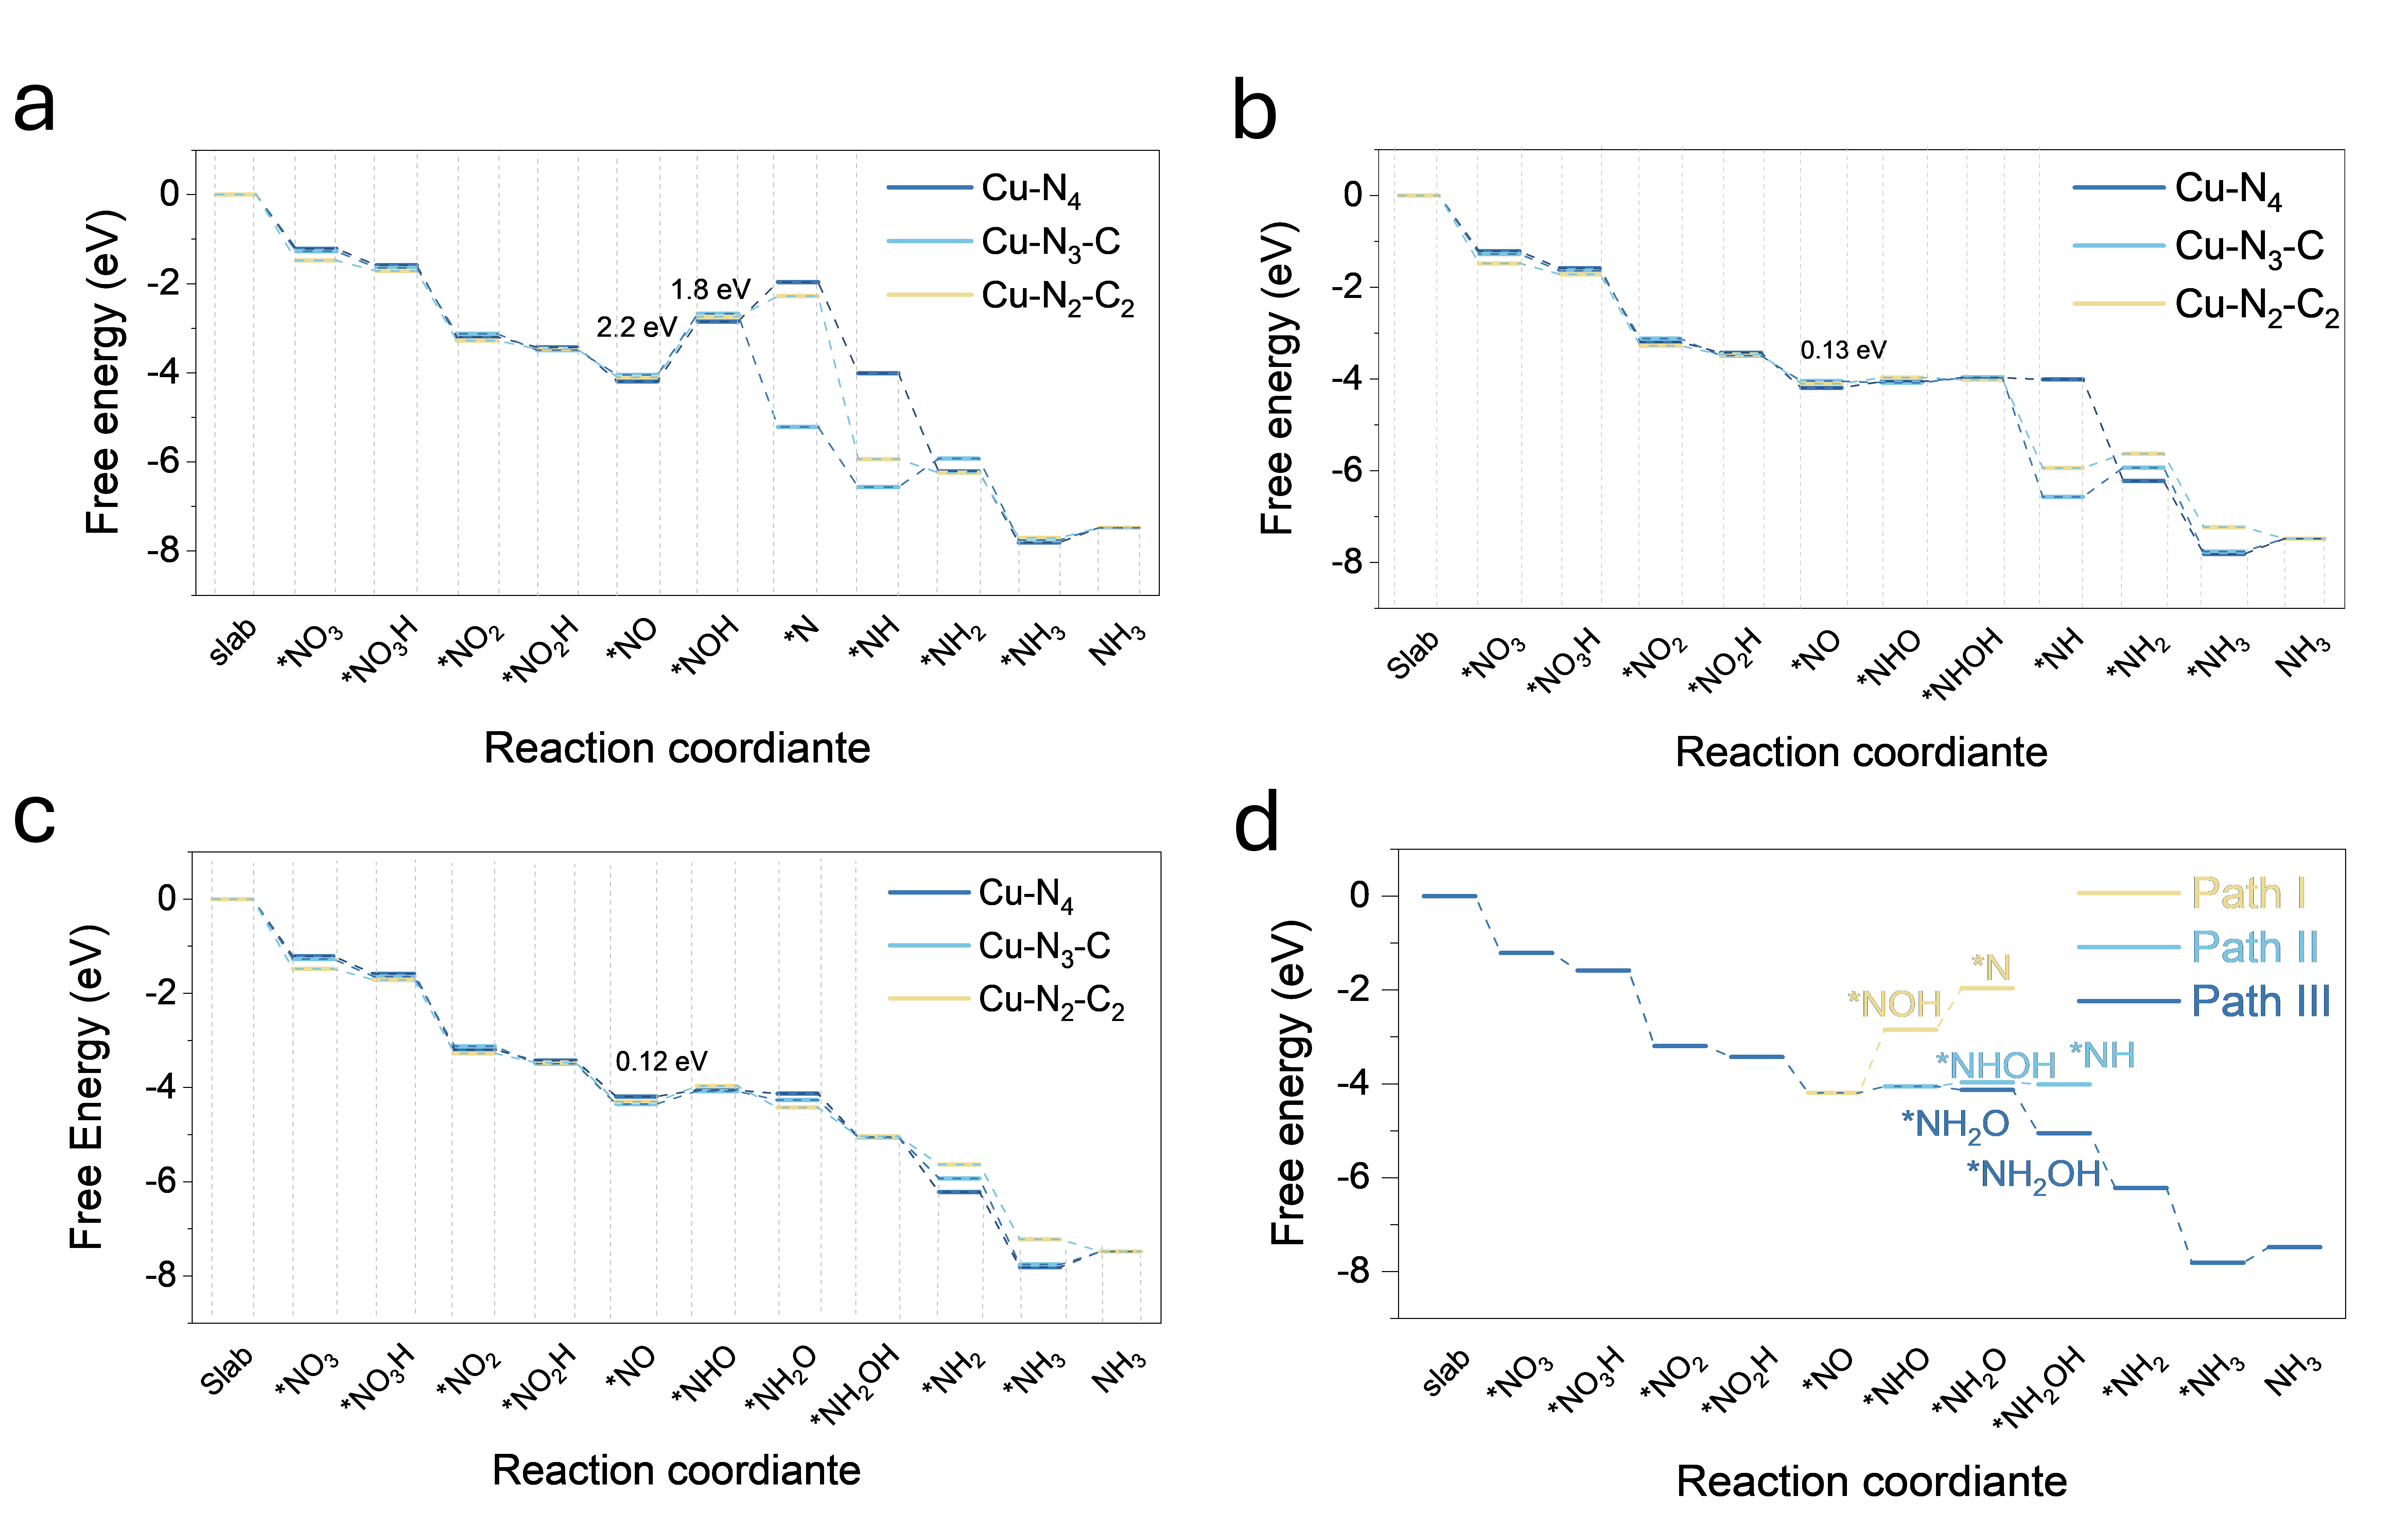


**Supplementary Fig. 53**. Alternate reaction pathways for NO3RR on modelled Cu–N4, Cu–N3-C, and Cu–N2-C2 sites. (a) pathway I, (b) pathway II, (c) pathway III, and (d) integrated pathways for NO3RR on the active sites. The elementary reactions of NO3– reduction on different catalysts surfaces in neutral solution were simulated according to the following reactions:

Pathway I:

Pathway II:

Pathway III:

Desorption:

where * stands for adsorption or active sites. Three competitive pathways of nitrate NO3RR on Cu–N4 are identified. The free energy changes on Cu–N3-C and Cu–N2-C2 were also simultaneously used as references. All pathways share the common deoxygenation steps: *NO3⁻ → *NO3H → *NO2 → *NO2H → *NO (Eq.15–Eq.19). Pathway I as shown in Supplementary Fig. 53a proceeds via *NO → *NOH → *N → *NH → *NH2 → *NH3 with a high barrier of 2.2 eV for *NO → *NOH (Eq.15– Eq.23, Eq. 30 and 31). Pathway II illustrated in Supplementary Fig. 53b follows *NO → *NHO → *NHOH → *NH → *NH2 → *NH3 with a barrier of 0.13 eV for *NO → *NHO (Eq.15–Eq.19, Eq. 24–Eq. 26, Eq. 30 and 31). Pathway III (Supplementary Fig. 53c) undergoes *NO → *NHO → *NH2O → *NH2OH → *NH2 → *NH3 with nearly negligible energy barriers (Eq.15–Eq.19, Eq. 27–Eq. 31).


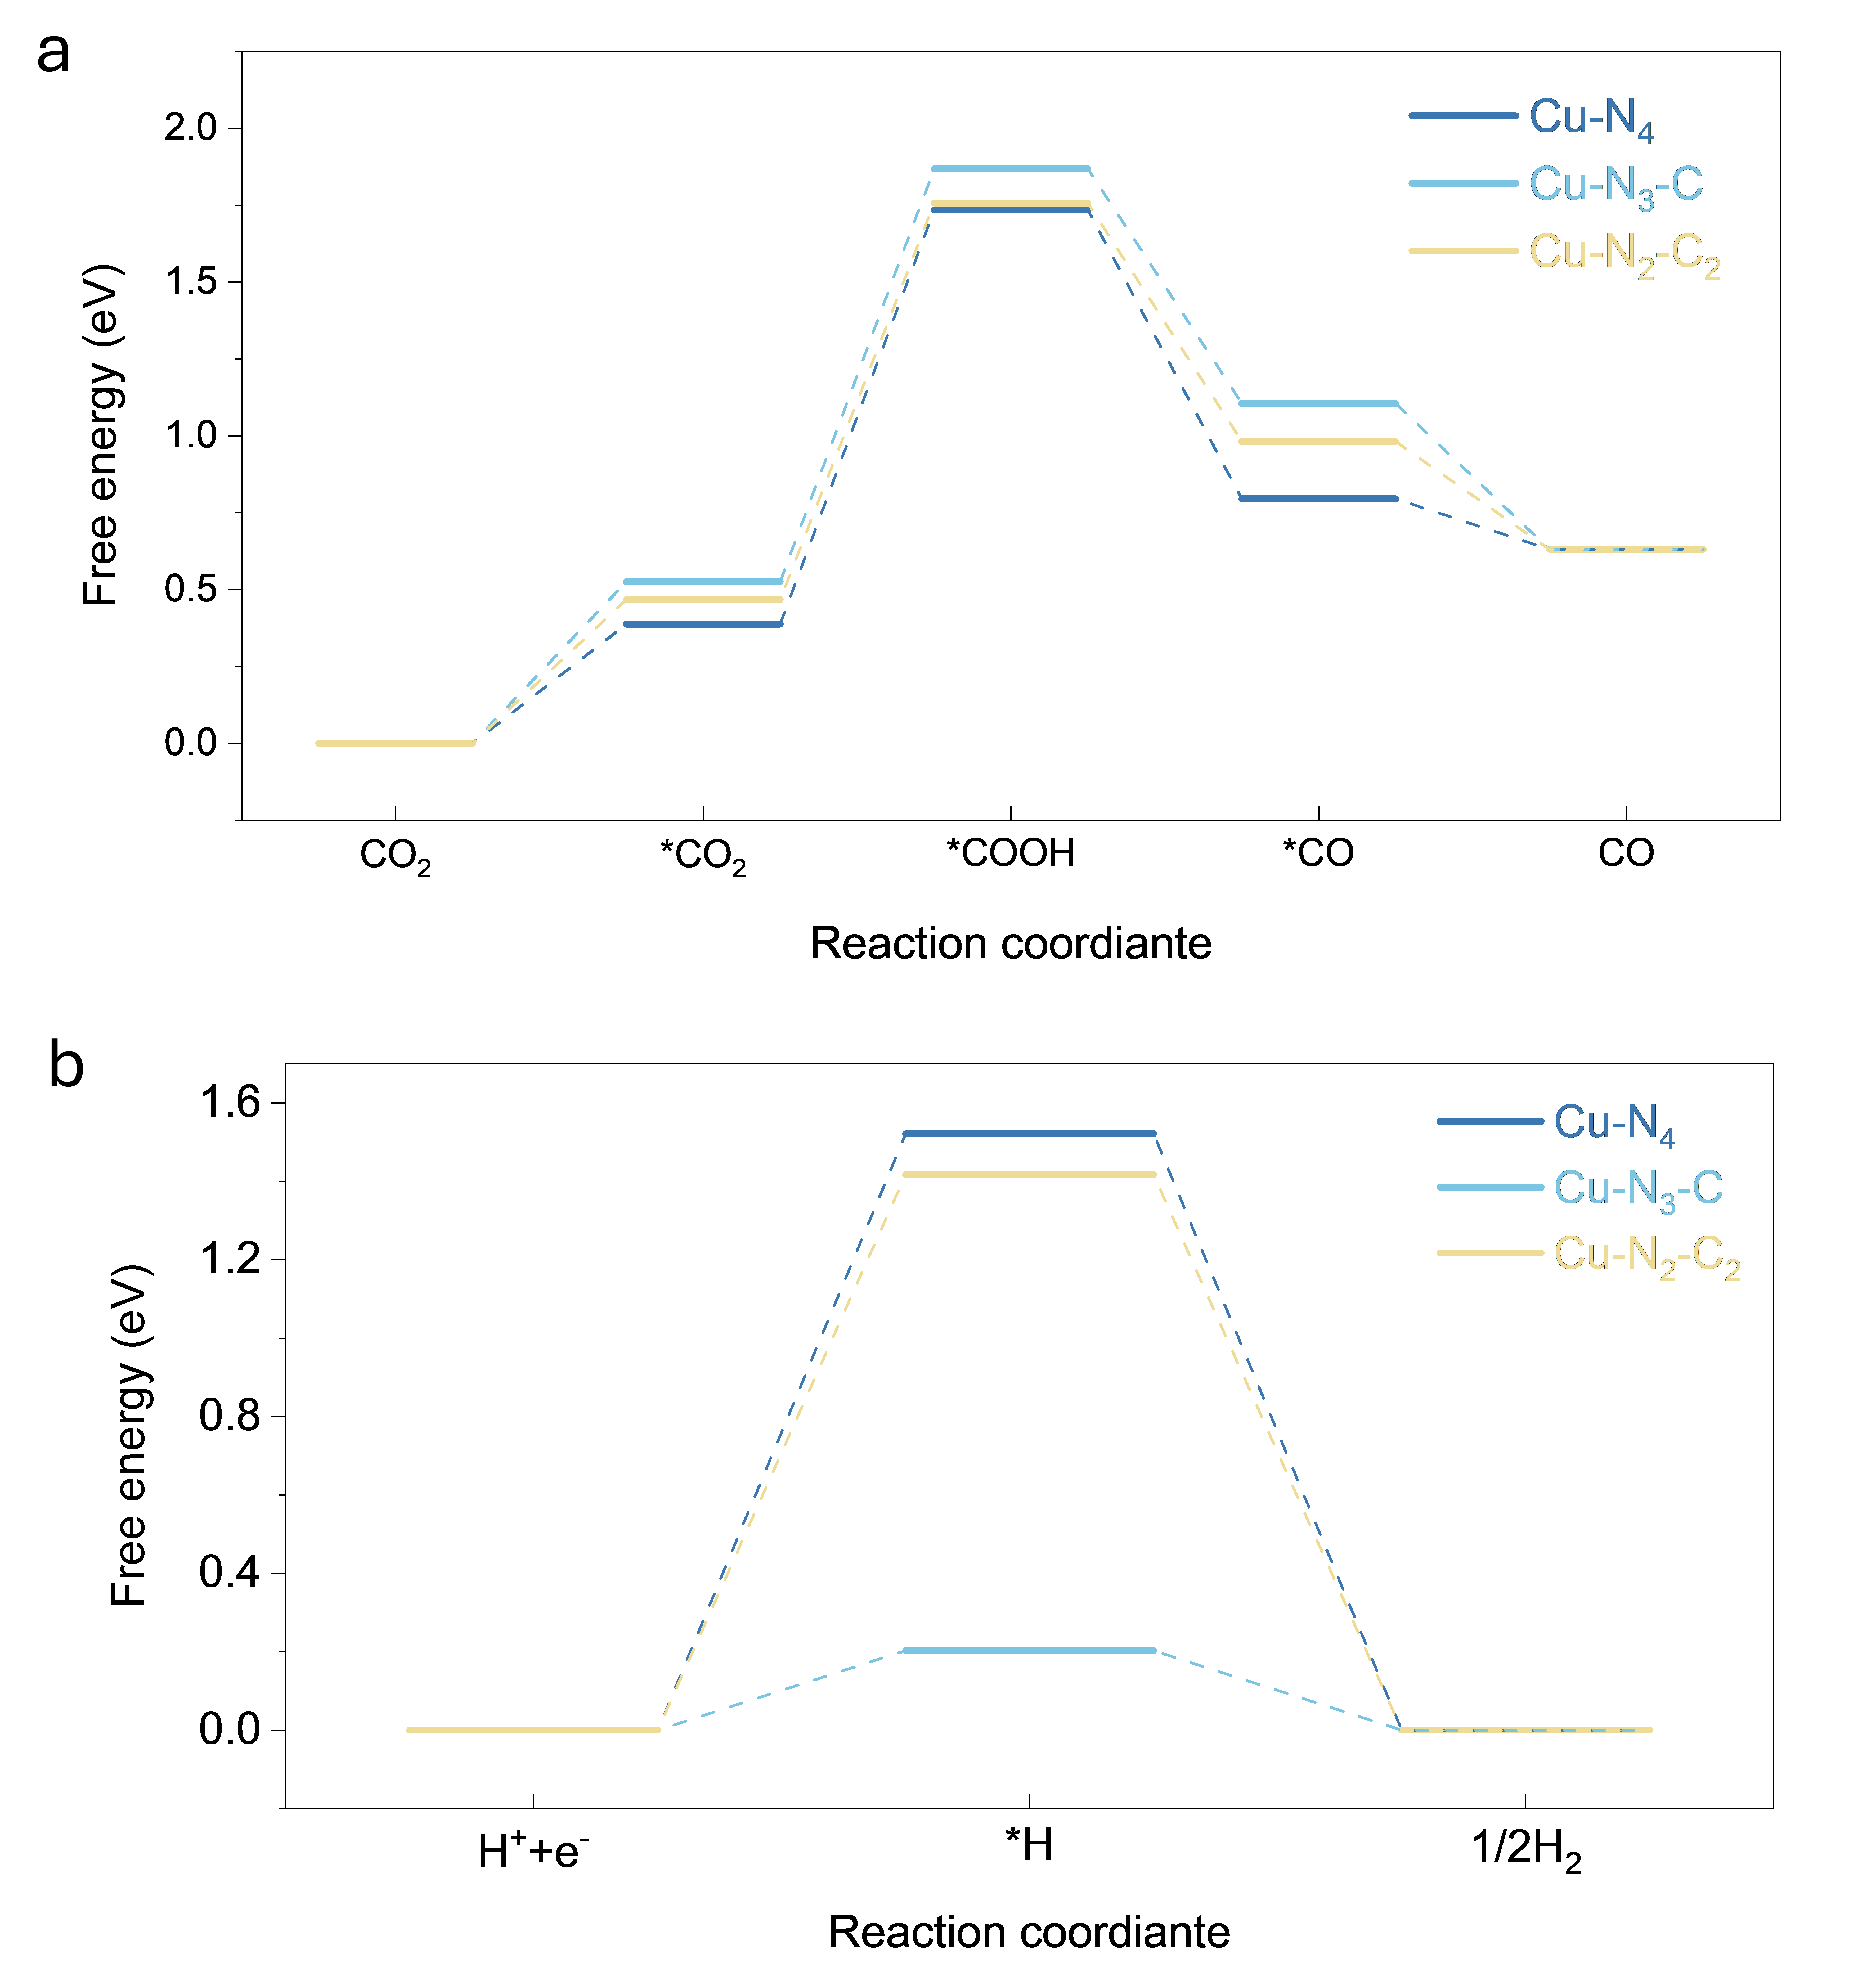


**Supplementary Fig. 54**. Reaction pathways for (a) CO2RR and (b) HER on modelled Cu–N4, Cu–N3-C, and Cu–N2-C2 sites in neutral solution.

The reactions for HER and CO2RR in neutral solution were simulated according to the following equations:

where * stands for adsorption or active sites. The energy barriers for CO2 adsorption on the surfaces of Cu–N4, Cu–N3–C and Cu–N2-C2 are 0.39 eV, 0.53 eV and 0.47 eV respectively; the energy barriers for the initial reduction are 1.35 eV, 1.34 eV and 1.29 eV. The reaction energy barriers of HER for Cu–N4, Cu–N3–C and Cu–N2-C2 are 1.52 eV, 0.21 eV and 1.42 eV respectively.


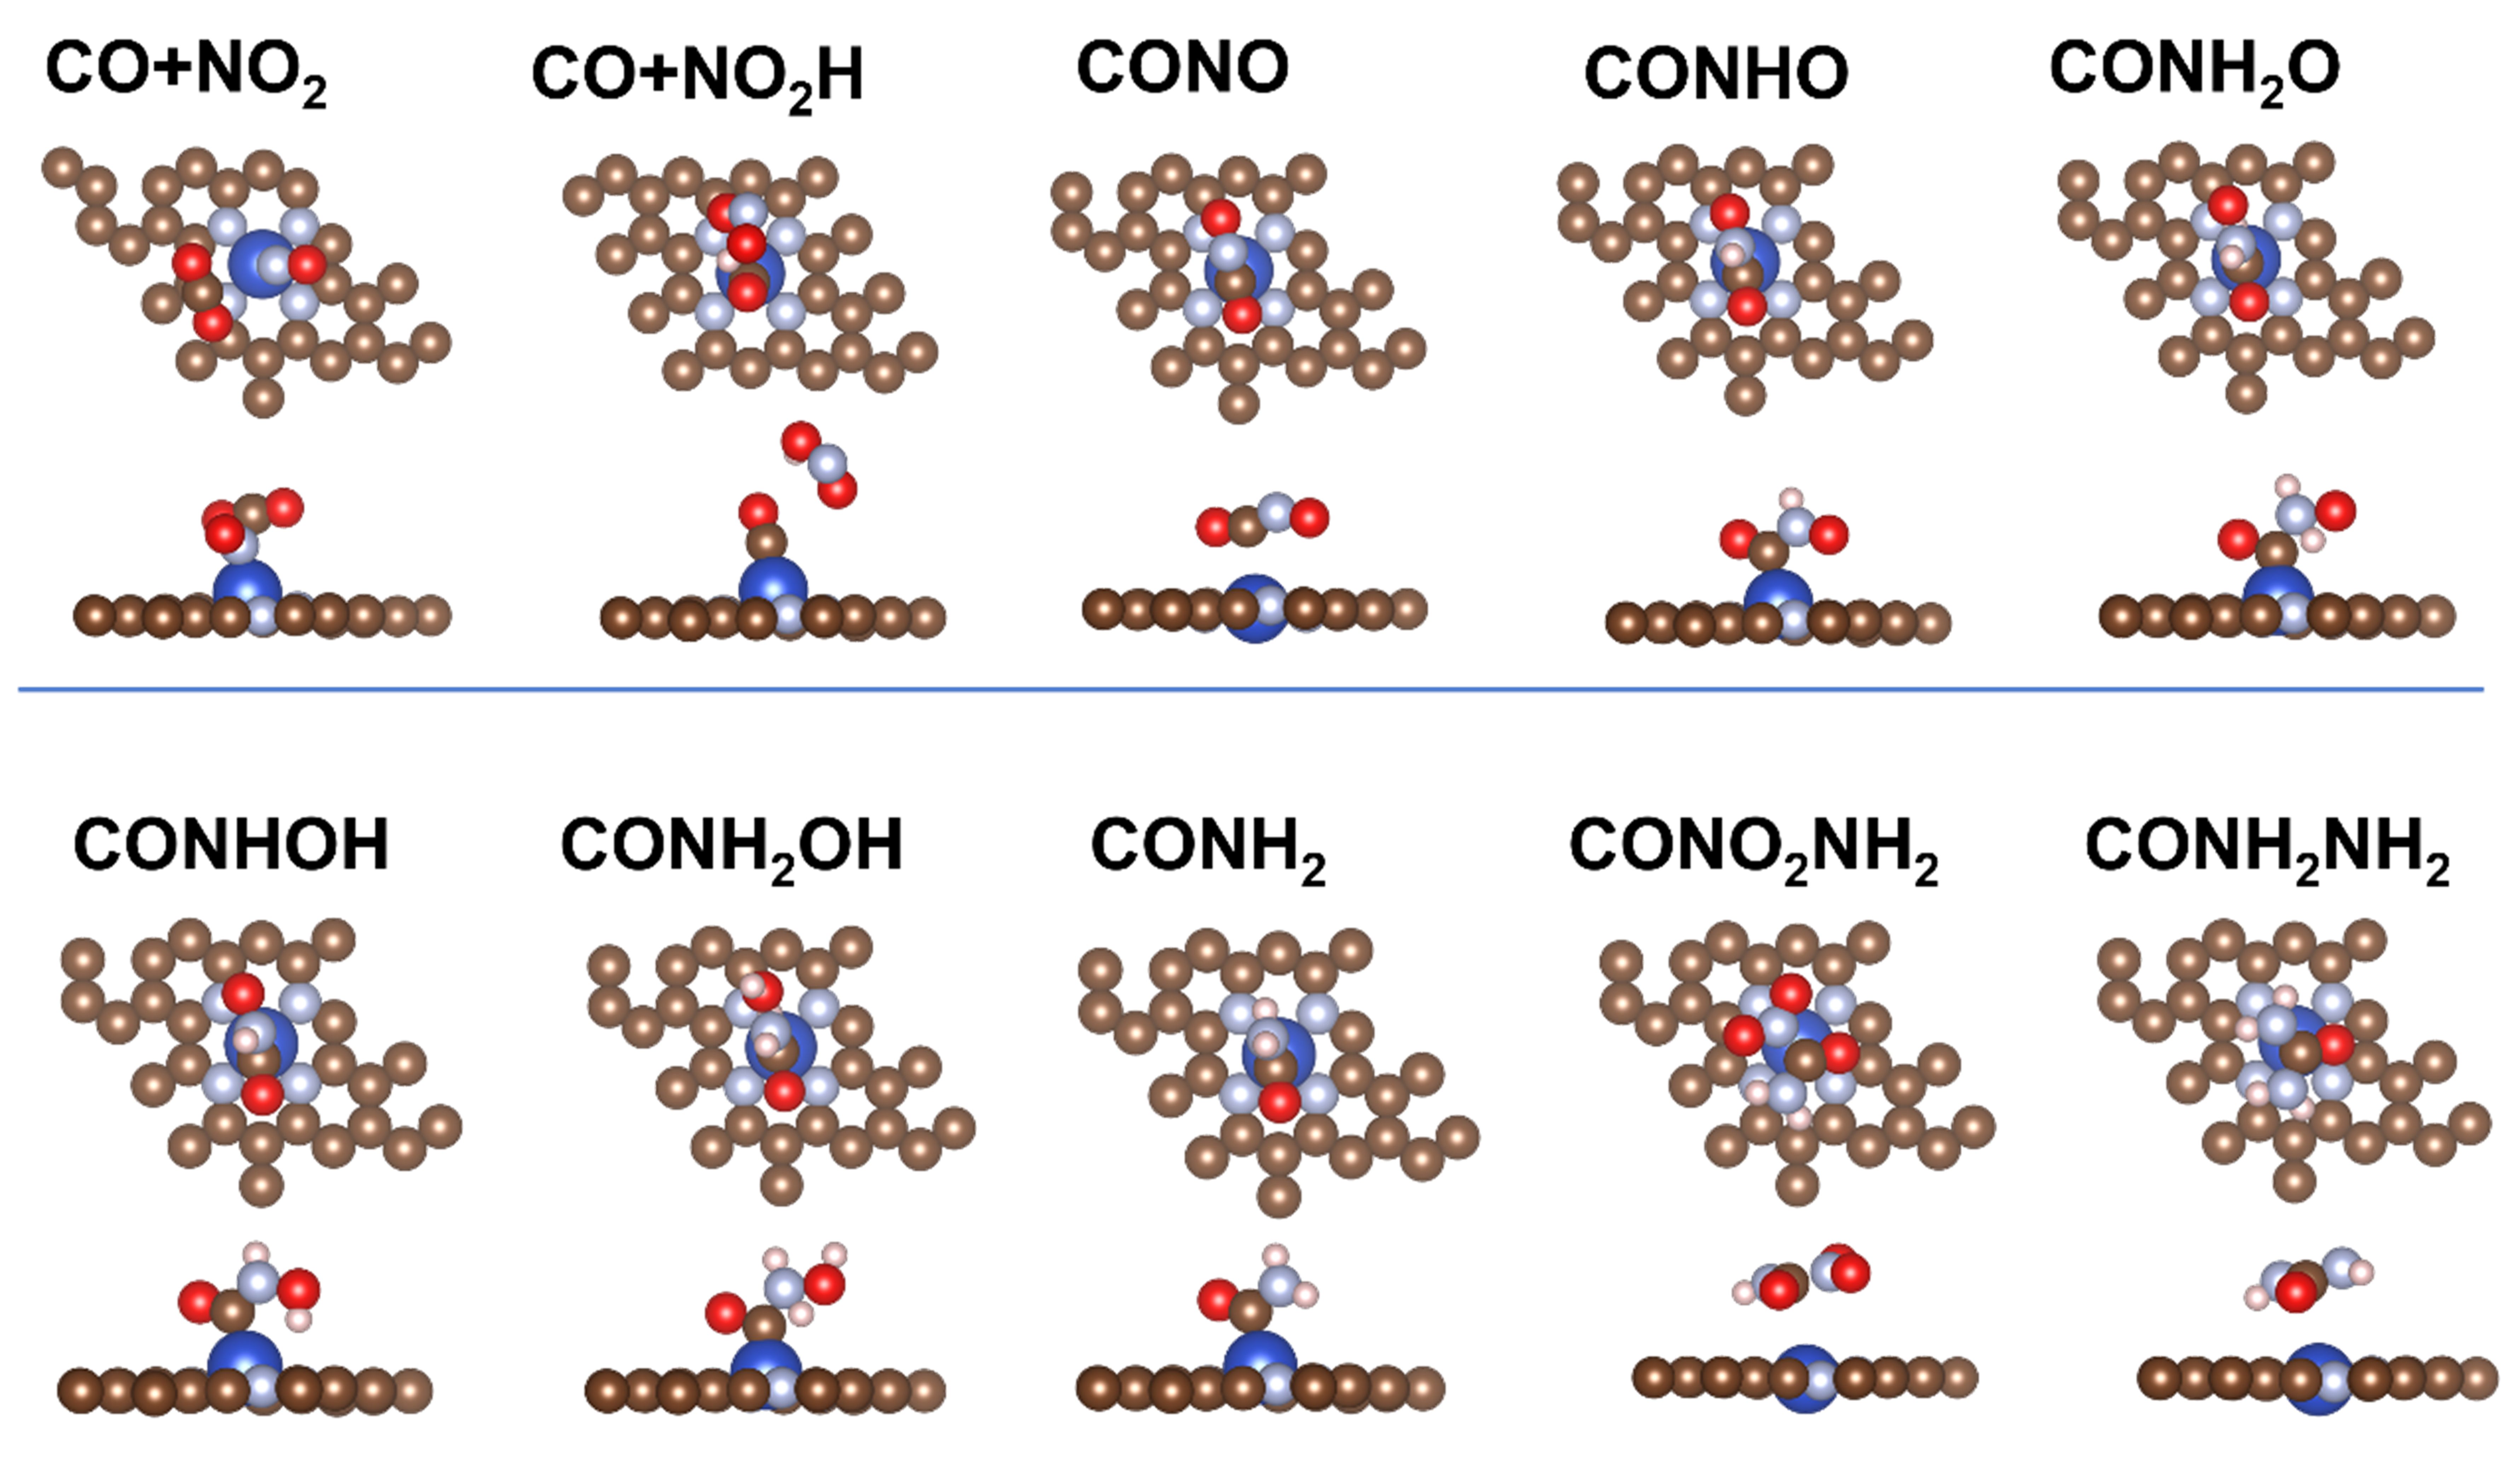


**Supplementary Fig. 55**. Optimized adsorption configuration of key species involved in C–N coupling reactions on the modelled Cu–N4 site. Color code: brown = C, blue = Cu, red = O, silvery = N, white = H. Calculated via DFT (VASP 6.4.4, PBE-GGA functional).


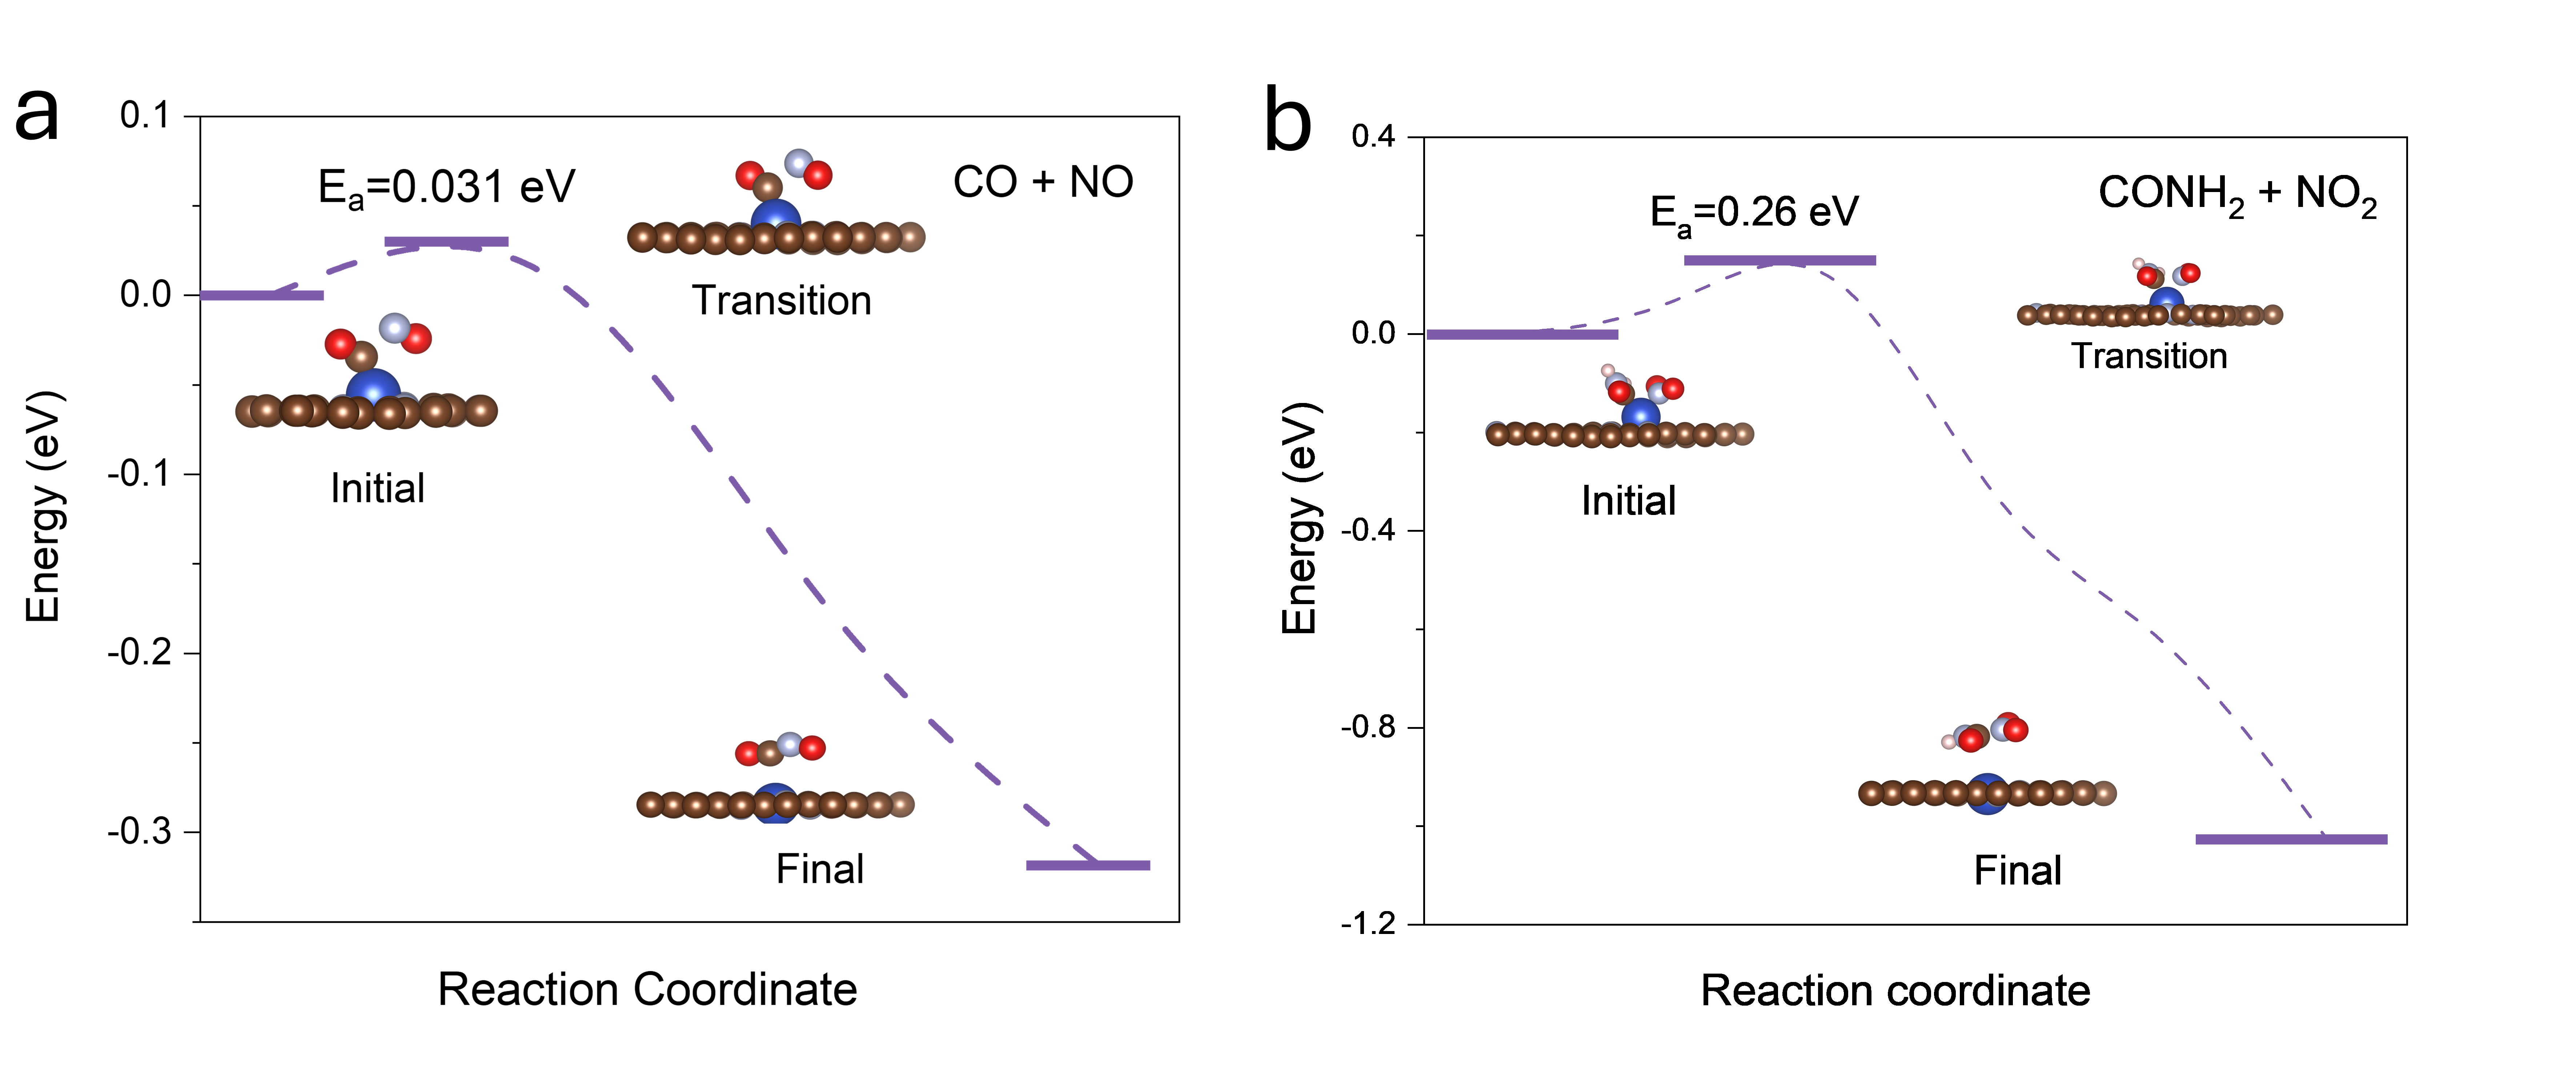


**Supplementary Fig. 56**. Optimized initial state, transition state and final state of C–N coupling steps on the modelled Cu–N4 site: (a) coupling between *CO and *NO, (b) coupling between *CONH2 and *NO2. Color code: brown = C, blue = Cu, red = O, silvery = N, white = H. Calculated via DFT (VASP 6.4.4, PBE-GGA functional).

**Electrocatalytic urea synthesis reaction pathways and competing side reactions**:For C–N coupling urea synthesis, CO2 was first reduced to *CO via a 2-electron transfer process, followed by multi-step C–N coupling reaction with NO3RR-derived intermediates to produce urea (Fig. 5b). The elementary reactions of C–N coupling on different catalyst surfaces were simulated according to the following 16-electron total reaction and stepwise proton-coupled electron transfer processes:

CO2 reduction to *CO intermediate

NO3– reduction to *NO intermediate:

First C–N coupling:

Second NO3– reduction to *NO2 intermediate:

The electrocatalytic synthesis of urea from CO2 and NO3⁻ follows a 16-electron total reaction shown in Eq. 36. The reaction proceeds via sequential proton-coupled electron transfer steps, starting with the reduction of CO2 to the key carbon intermediate *CO through Eq. 37 and Eq. 38. Meanwhile, NO3⁻ is reduced to the key nitrogen intermediate *NO via four consecutive steps described in Eq. 39 to Eq. 42. The first C–N bond formation occurs through the coupling of *CO and *NO to generate *CONO intermediate in Eq. 43, followed by sequential hydrogenation steps via Eq. 44 to Eq. 47 to produce *CONH2. The second nitrogen-containing moiety is introduced via the reduction of NO3⁻ to *NO2 through Eq. 48 to Eq. 50, followed by the second C–N coupling between *CONH2 and *NO2 in Eq. 51. The resulting *CONH2NO2 intermediate undergoes four-electron four-proton hydrogenation via Eq. 52, and the final urea product is formed and desorbed from the catalyst surface through Eq. 53. Three competing side reaction pathways are identified alongside the main route. The first (S1) is the NO2 reduction and formation of *CO2 and *HNO2 with a reaction energy barrier of 2.63 eV. The second (S2) is the NO3RR dissociation pathway via the reaction *CONO + H⁺ + e⁻ → *CO + *NHO with an energy barrier of 2.18 eV. The third (S3) is the N-terminal reduction from *CONH to *CONH2 with an energy barrier of 0.57 eV.

The thermodynamic regulation of the main urea synthesis pathway and competing side reactions is achieved by the nanoconfined structure of tZIF-Cu900. The upshift of the Cu d-band center induced by the confined cavity was confirmed by both DFT calculations and XPS characterization. The modulated electronic structure optimizes the adsorption strength of key intermediates *CO and *NO on the Cu–N4 active sites. The adsorption free energies of *CO and *NO are tuned to a moderate range, which ensures sufficient activation of the two intermediates for C–N coupling while avoiding over-stabilization that leads to side reactions. The energy barrier of the rate-determining C–N coupling step in the main pathway was reduced to 0.031 eV (Supplementary Fig. 55), which was significantly lower than the energy barriers of all three competing side reactions. The thermodynamic favorability of the main reaction is thus greatly enhanced by the nanoconfined structure.

Kinetic selectivity toward the main urea synthesis pathway was further strengthened by the spatial confinement effect of the 1.8 nm cavity in tZIF-Cu900. Molecular dynamics simulations confirmed that the size-matched cavity prolongs the retention time of *CO and *NO intermediates, and enriches NO3⁻ anions near the active sites. The increased local concentration of key intermediates accelerates the bimolecular C–N coupling reaction, which follows a second-order kinetic law. In-situ Raman and ATR-SEIRAS characterization detected no signal of side reaction intermediates during electrolysis at the optimal potential, with only characteristic peaks of main reaction intermediates and urea observed. The nanoconfined cavity also suppresses the parasitic hydrogen evolution reaction via spatial restriction of hydrogen radical dimerization, as confirmed by EPR characterization. The concentrated hydrogen radicals in the cavity are directed toward the hydrogenation of C–N coupling intermediates instead of H2 formation, further improving the Faradaic efficiency of urea. The synergy of thermodynamic and kinetic regulation by the nanoconfined structure realizes the kinetic matching between CO2RR and NO3RR. The synchronous generation of *CO and *NO intermediates on the active sites eliminates the accumulation of uncoupled nitrogen intermediates, which are the main source of NH3 byproducts.

**Section 5. Pilot test setup**

**Design and operating conditions:** The pilot-scale test system for electrocatalytic urea synthesis was designed, constructed, and operated in collaboration with Ningxia Jianlong Special Steel Co., Ltd., a large-scale integrated iron and steel manufacturing enterprise located in Shizuishan City, Ningxia Hui Autonomous Region, China. The plant has an annual steel production capacity of 8 million tons, with a mature iron and steel flue gas comprehensive treatment system and industrial wastewater treatment facility, providing a realistic industrial scenario for the on-site valorization of waste CO2 and nitrate into urea. The pilot system utilized two waste streams from the steel plant as the sole carbon and nitrogen sources, eliminating the need for high-purity commercial feedstocks and reducing overall production costs.

The carbon source was the sintering machine head flue gas from the plant, the primary source of CO2 emissions from steel production. The raw flue gas had a typical composition of 10–20 vol% CO2, 75–80 vol% N2, 4–6 vol% O2, 500–1500 mg Nm–3 SO2, 200–600 mg Nm–3 NOx, 8–12 vol% H2O, and trace amounts of fly ash and heavy metals. The raw flue gas underwent a pretreatment process to meet the feed requirements of the electrolysis system. It first passed through a bag filter to remove residual fly ash, then entered a wet flue gas desulfurization tower and selective catalytic reduction unit, achieving >99.9% SO2 removal to below 1 ppm and >98% denitrification efficiency to NOₓ concentration below 5 ppm. The pretreated flue gas entered an amine-based CO2 capture unit with 30 wt% monoethanolamine solution, releasing high-purity CO2 of >99.5 vol% via steam stripping regeneration. The captured CO2 was compressed, dried, and delivered to the cathode gas chamber of the electrolyzer with a flow rate controlled by a mass flow controller.

The nitrogen source was nitrate-rich wastewater from the plant’s flue gas denitrification system, rolling and pickling processes. The raw wastewater had a nitrate concentration of 300–1800 mg L–1 (total nitrogen), a pH of 5.0–7.5, and contains trace amounts of ammonia, urea, and suspended solids. The raw wastewater was pretreated via a multimedia filter with quartz sand and activated carbon to remove suspended solids and organic impurities, reducing turbidity to below 0.5 NTU, and then concentrated to 0.5 M via reverse osmosis to match the concentration requirements of the electrolysis reaction.

The core of the pilot system was a modular zero-gap proton exchange membrane electrolyzer stack, designed and constructed in-house. The stack consisted of 14 parallel electrolyzer modules, each with an effective geometric electrode area of 400 mm × 300 mm, giving a total effective electrode area of 1.68 m2. Each module adopted a zero-gap sandwich structure fully consistent with the lab-scale flow cell configuration, consisting of an anode flow field plate, iridium oxide coated titanium mesh anode, proton exchange membrane, gas diffusion electrode cathode, and cathode flow field plate.

The anode was a commercial titanium mesh coated with iridium oxide catalyst at a loading of 2 mg cm–2, which exhibits high oxygen evolution reaction activity and stability in alkaline electrolyte. The cathode gas diffusion electrode was fabricated via a continuous roll-to-roll coating process. The tZIF-Cu900 catalyst was coated on hydrophobic carbon fiber paper with a microporous layer at a loading of 0.02–0.05 mg cm–2, consistent with the optimal loading identified in lab-scale tests. The catalyst ink was prepared by dispersing tZIF-Cu900 powder in a mixed solvent of isopropanol and deionized water, with 5 wt% Nafion ionomers as the binder to reach a solid content of 5 wt%. The ink was coated on the electrolyte-facing side of the carbon paper via a slot-die coater at 2 m min–1, followed by sequential drying in a three-stage oven at 60 °C, 80 °C, and 120 °C. The proton exchange membrane used was Nepem-W with a thickness of 125 μm, pre-activated by soaking in hydrogen peroxide and 0.5 M sulfuric acid solution for 24 h at room temperature and rinsed with deionized water before assembly.

The pilot system was operated in a continuous flow mode. The stack was operated at a constant cell voltage of 2.2–2.5 V, with a current density of 12.5 mA cm–2 during start-up corresponding to a total current of 210 A, which decreased to 5 mA cm–2 after reaching stable operation corresponding to a total current of 84 A. The electrolysis temperature was maintained at 30–40 °C via a jacketed heat exchanger on the electrolyte circulation loop. Pretreated carbon dioxide gas was fed to the cathode gas chamber at 0.5–1.0 L min–1, with a relative humidity of 90% achieved via a humidifier before entering the stack. The electrolyte was circulated through the anode and cathode chambers at 2–5 L h–1 via a magnetic centrifugal pump, with a residence time of 15 min in the electrolyzer. Cathode effluent was collected at regular intervals from the electrolyte circulation loop, with urea concentration monitored in real time via an online UV-vis spectrophotometer, and samples collected every 2 h for offline quantification via the diacetyl monoxime method and 1H NMR spectroscopy, consistent with the methods detailed in Supplementary Information section 3.3.

Solid urea product was recovered from the collected cathode effluent via a sequential purification process to remove nitrate and carbonate impurities. The collected effluent first underwent low-temperature static settling to remove suspended impurities, with the supernatant passed through a cation exchange resin column to remove potassium ions. The effluent was then subjected to nanofiltration separation to remove nitrate and carbonate anionic impurities, followed by low-temperature atmospheric concentration and recrystallization to obtain solid urea product. The purity of the urea product was determined via 1H NMR spectroscopy, with a measured purity of no less than 99.5%.

The long-term performance of the pilot system was evaluated via 300 h of continuous operation. The system maintained a stable urea production rate of more than 2.4 g gcat–1 h–1, with a urea Faradaic efficiency of 90% and energy consumption of 14920 kWh t–1 of urea, as shown in Fig. 5d. Post-mortem analysis of the cathode catalyst after 300 h of operation was performed via scanning electron microscopy, transmission electron microscopy, and X-ray photoelectron spectroscopy, corresponding to Supplementary Figs. 8, 9 and 16. The characterization results confirms that the rhombic dodecahedral morphology of the tZIF-Cu900 catalyst was fully preserved, with no detectable copper agglomeration or leaching observed, and the chemical environment of the active sites remained consistent with the fresh catalyst. These results demonstrate the excellent long-term stability of the nanoconfined catalyst under industrial operating conditions.

**Techno-economic sensitivity analysis and break-even calculation:** All sensitivity and break-even calculations were based on the net levelized cost (Cₙₑₜ) model consistent with the main text, with complete sub-formulas and parameter interpretations as follows:

Techno-economic analysis was performed to quantify industrial viability where net consumption () is defined as:

where = energy consumption cost (14920 kWh t⁻¹ urea, 0.032 USD kWh⁻¹); = feed pretreatment, labor and equipment costs, minimized via shared infrastructure (38.56, 26.00, and 20.00 USD t⁻¹, respectively); = carbon trading revenue from 1.87 t CO2 fixation per ton urea (20.76 USD t⁻¹); = saved nitrate wastewater treatment fees (96.00 USD t⁻¹); = reclaimed water recycling income (2.45 USD t⁻¹); = raw material savings from waste valorization (132.79 USD t⁻¹). All parameters are based on 2026 industrial actual values71,72.

Sensitivity analysis was performed under single-variable control (other parameters fixed at benchmark values), with break-even threshold defined as ≤ conventional urea production cost (460 USD t⁻¹ for North America, 650 USD t⁻¹ for EU). Break-even boundaries are plotted by fitting the linear correlation between and each sensitive parameter, with coordinate axes set as parameter value and net urea cost. The intersection of the fitted curve and conventional urea cost baseline represents the critical commercialization threshold, confirming the technology maintains cost competitiveness within wide parameter fluctuations and possesses clear large-scale application potential.


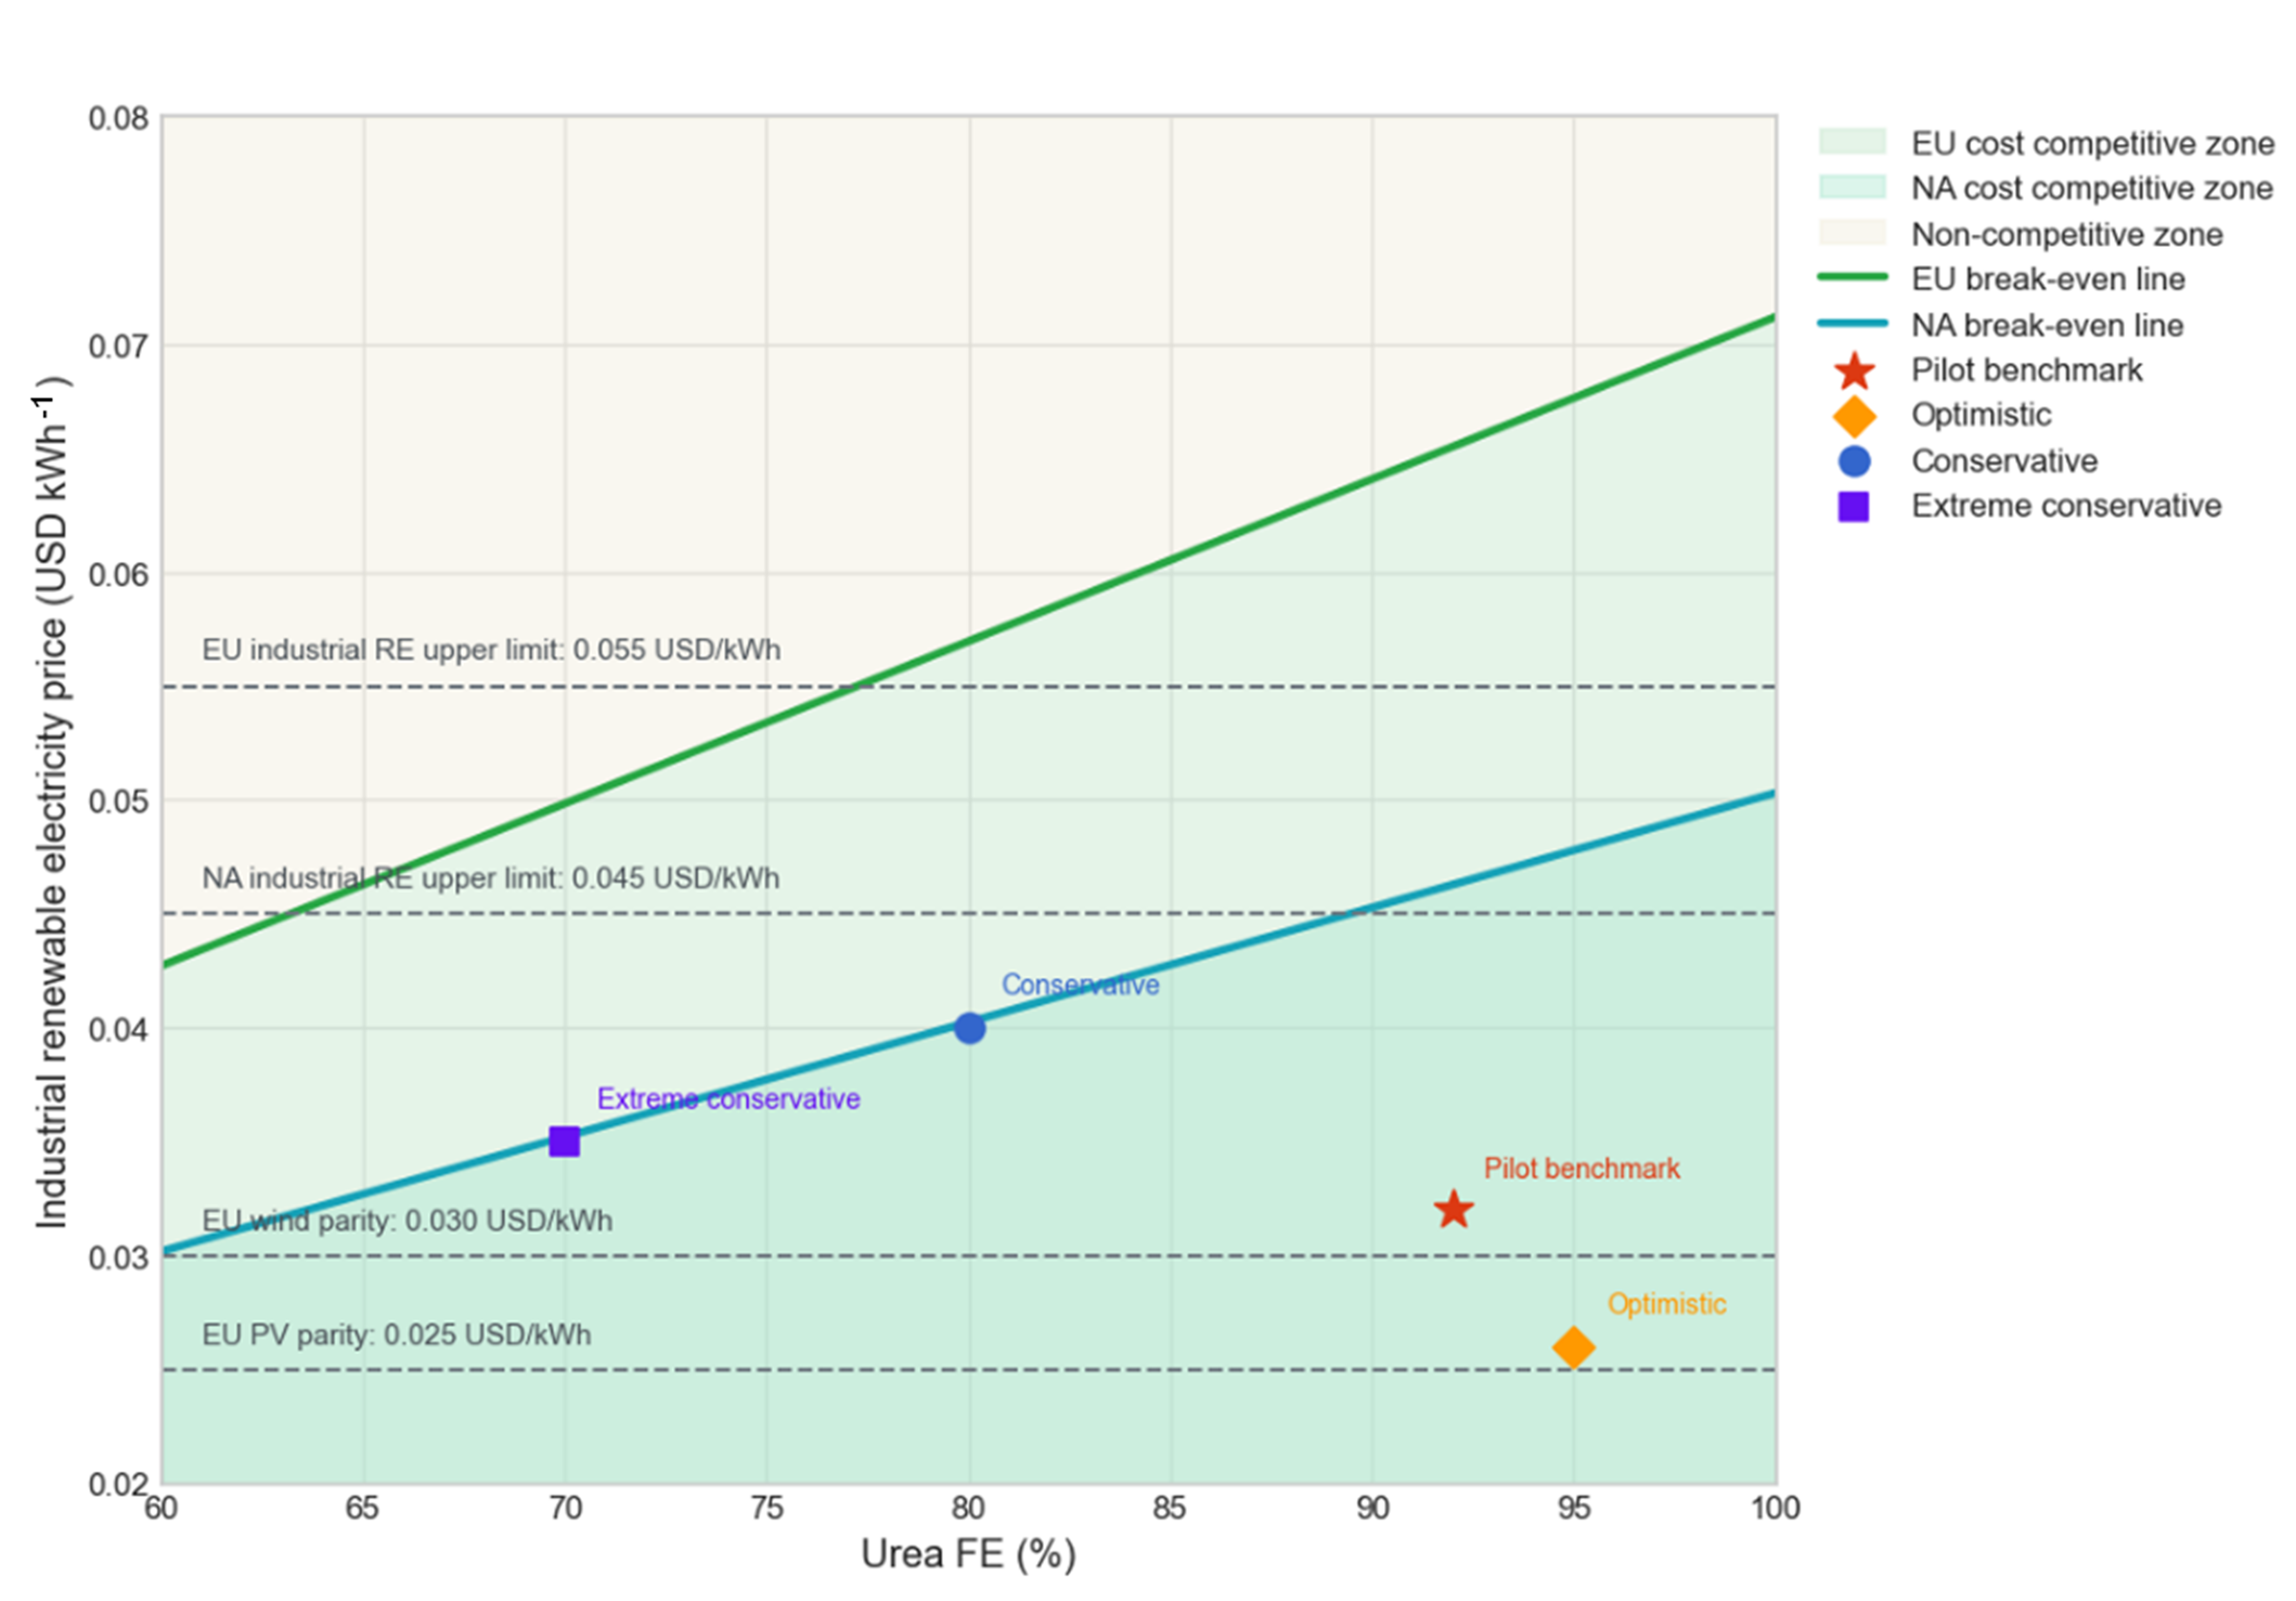


**Supplementary Fig. 57**. Techno-economic sensitivity analysis and break-even evaluation of the electrocatalytic urea synthesis technology based on 2026 industrial benchmark prices: net levelized cost of urea as a function of urea Faradaic efficiency and electricity price. The break-even baselines of conventional urea production in North America (NA) and European Union (EU) are shown as references.

**References**

1. Lastoskie, C., Gubbins, K. E. & Quirke, N. Pore size distribution analysis of microporous carbons: a density functional theory approach. *J Phys. Chem.* **97**, 4786–4796 (1993).

2. Doraghi, Z., Alinezhad, H. & Ahmadi, A. A copper–doped ZIF–8: A high–performance catalyst for eco-friendly Ullmann and Biginelli reactions. *Sci. Rep.* **15**, 24432 (2025).

3. Yang, Y. *et al.* Bioinspired Cu(II) defect sites in ZIF-8 for selective methane oxidation. *J. Am. Chem. Soc.* **145**, 22019–22030 (2023).

4. Zan, Y. *et al.* Copper nanoparticles supported on ZIF-8: Comparison of Cu(II) reduction processes and application as benzyl alcohol oxidation catalysts. *ACS Appl. Mater. Interfaces* **15**, 38716–38728 (2023).

5. Nozari, V. *et al.* Ionic liquid facilitated melting of the metal–organic framework ZIF-8. *Nat. Commun.* **12**, 5703 (2021).

6. Nahian, M. S., Pritom, R. & Islam, M. M. Revealing mechanistic insights into amorphous graphite formation from oxygenated polar heavy-end aromatic feedstock. *J. Phys. Chem. C* **127**, 20146–20156 (2023).

7. Gaffney, J. S., Marley, N. A. & Smith, K. J. Characterization of fine mode atmospheric aerosols by Raman microscopy and diffuse reflectance FTIR. *J. Phys. Chem. A* **119**, 4524–4532 (2015).

8. Li, L., An, B., Lahiri, A., Wang, P. & Fang, Y. Doublet of D and 2D bands in graphene deposited with Ag nanoparticles by surface enhanced Raman spectroscopy. *Carbon* **65**, 359–364 (2013).

9. Cheng, H. *et al.* Construction of atomically dispersed Cu–N4 sites via engineered coordination environment for high–efficient CO2 electroreduction. *Chem. Eng. J.* **407**, 126842 (2021).

10. Chen, X. *et al.* Metal–organic framework-derived mesoporous carbon nanoframes embedded with atomically dispersed Fe–Nx active sites for efficient bifunctional oxygen and carbon dioxide electroreduction. *Appl. Catal. B: Environ.***267**, 118720 (2020).

11. Ma, S. *et al.* Ionic exchange of metal–organic frameworks for constructing unsaturated copper single–atom catalysts for boosting oxygen reduction reaction. *Small* **16**, 2001384 (2020).

12. Xie, Z. *et al.* Solar–driven co–production of C2H4 and H2O2 from CO2 and H2O. *Nat. Commun.* (2026).

13. Xiong, Y. *et al.* Construction of dual-active-site copper catalyst containing both Cu–N3 and Cu–N4 sites. *Small* **17**, 2006834 (2021).

14. Young, V. Angular distribution XPS studies on carbon foil. *Carbon* **20**, 35–39 (1982).

15. Du, X. W., Fu, Y., Sun, J., Yao, P. & Cui, L. Intensive light emission from SiCN films by reactive RF magnetron sputtering. *Mater. Chem. Phys.* **103**, 456–460 (2007).

16. Chen, X., Wang, X. & Fang, D. A review on C1s XPS-spectra for some kinds of carbon materials. *Fuller. Nanotub. Car. Nanostruct.* **28**, 1048–1058 (2020).

17. Kau, L. S., Spira-Solomon, D. J., Penner-Hahn, J. E., Hodgson, K. O. & Solomon, E. I. X-ray absorption edge determination of the oxidation state and coordination number of copper. Application to the type 3 site in Rhus vernicifera laccase and its reaction with oxygen. *J. Am. Chem. Soc.* **109**, 6433–6442 (1987).

18. Liao, Y. T. *et al.* Mesoporous TiO2 embedded with a uniform distribution of CuO exhibit enhanced charge separation and photocatalytic efficiency. *ACS Appl. Mater. Interf.* **9**, 42425–42429 (2017).

19. Gong, C. *et al.* Selective electrocatalytic synthesis of urea using entangled iron porphyrins in covalent organic frameworks. *Nat. Synth.* **4**, 720–729 (2025).

20. March, W., Fingerhut, B. & Miller, E. Determination of urea by diacetylmonoxime method. *Clin. Chem* **11**, 624 (1965).

21. Yee, J. Y. & Davis, R. O. E. Determination of ammoniacal and urea nitrogen. *Ind. Eng. Chem. Ana. Ed.* **7**, 259–261 (1935).

22. Chen, L. & Hu, Y. in *2011 International Symposium on Water Resource and Environmental Protection.* 1173–1176.

23. Liu, S. *et al.* Selective electrosynthesis of urea from nitrate and carbon dioxide with low overpotential. *Nat. Commun.* **17**, 1787 (2026).

24. Shibata, M., Yoshida, K. & Furuya, N. Electrochemical synthesis of urea on reduction of carbon dioxide with nitrate and nitrite ions using Cu-loaded gas-diffusion electrode. *J. Electroanal. Chem.* **387**, 143–145 (1995).

25. Shibata, M., Yoshida, K. & Furuya, N. Electrochemical synthesis of urea at gas-diffusion electrodes: IV. Simultaneous reduction of carbon dioxide and nitrate ions with various metal catalysts. *J. Electrochem. Soc.* **145**, 2348 (1998).

26. Shibata, M. & Furuya, N. Electrochemical synthesis of urea at gas-diffusion electrodes: Part VI. Simultaneous reduction of carbon dioxide and nitrite ions with various metallophthalocyanine catalysts. *J. Electroanal. Chem.* **507**, 177–184 (2001).

27. Lv, C. *et al.* Selective electrocatalytic synthesis of urea with nitrate and carbon dioxide. *Nat. Sustainability* **4**, 868–876 (2021).

28. Lv, C. *et al.* A defect engineered electrocatalyst that promotes high–efficiency urea synthesis under ambient conditions. *ACS Nano* **16**, 8213–8222 (2022).

29. Leverett, J. *et al.* Tuning the coordination structure of Cu–N–C single atom catalysts for simultaneous electrochemical reduction of CO2 and NO3– to urea. *Adv. Energy Mater.* **12**, 2201500 (2022).

30. Gerke, C. S. *et al.* Electrochemical C–N bond formation within boron imidazolate cages featuring single copper sites. *J. Am. Chem. Soc.* **145**, 26144–26151 (2023).

31. Zhao, Y. *et al.* Efficient urea electrosynthesis from carbon dioxide and nitrate via alternating Cu–W bimetallic C–N coupling sites. *Nat. Commun.* **14**, 4491 (2023).

32. Tu, X. *et al.* A universal approach for sustainable urea synthesis via intermediate assembly at the electrode/electrolyte interface. *Angew. Chem. Int. Ed.* **136**, e202317087 (2024).

33. Zhang, M. D., Huang, J. R., Liao, P. Q. & Chen, X. M. Utilisation of carbon dioxide and nitrate for urea electrosynthesis with a Cu-based metal-organic framework. *Chem. Commun.* **60**, 3669–3672 (2024).

34. Luo, Y. *et al.* Selective electrochemical synthesis of urea from nitrate and CO2 via relay catalysis on hybrid catalysts. *Nat. Catal.* **6**, 939–948 (2023).

35. Zhao, Q. *et al.* Sustainable and high-rate electrosynthesis of nitrogen fertilizer. *Angew. Chem. Int. Ed.* **62**, e202307123 (2023).

36. Gao, Y. *et al.* Tandem catalysts enabling efficient C−N coupling toward the electrosynthesis of urea. *Angew. Chem. Int. Ed.* **136**, e202402215 (2024).

37. Chen, Y. *et al.* Exploration of a novel electrochemical CN coupling process: Urea synthesis from direct air carbon capture with nitrate wastewater. *Sci. Total Environ.* **913**, 169722 (2024).

38. Cong, M. *et al.* Electrocatalytic urea synthesis from CO2 and nitrate co–reduction on natural vitamin B12 coupled carbon nanotubes. *Appl. Catal. B: Environ.* **351**, 123941 (2024).

39. Zhang, X. *et al.* Identifying and tailoring C–N coupling site for efficient urea synthesis over diatomic Fe–Ni catalyst. *Nat. Commun.* **13**, 5337 (2022).

40. Li, Z. *et al.* Synergistic electrocatalysis of crystal facet and O-vacancy for enhancive urea synthesis from nitrate and CO2. *Appl. Catal. B: Environ.***338**, 122962 (2023).

41. Mao, Y. *et al.* Enhanced performance of oxygen vacancy-rich In-TiO2 materials for electrocatalytic urea synthesis via a relay catalysis strategy. *Chem. Eng. J.* **485**, 150052 (2024).

42. Wei, X. *et al.* Dynamic reconstitution between copper single atoms and clusters for electrocatalytic urea synthesis. *Adv. Mater.* **35**, 2300020 (2023).

43. Geng, J. *et al.* Ambient electrosynthesis of urea with nitrate and carbon dioxide over iron-based dual-sites. *Angew. Chem. Int. Ed.* **62**, e202210958 (2023).

44. Zhao, J. *et al.* Identifying the facet-dependent active sites of Cu2O for selective C–N coupling toward electrocatalytic urea synthesis. *Appl. Catal. B: Environ.* **340**, 123265 (2024).

45. Yin, Y. *et al.* Efficient urea electrosynthesis from CO2 and nitrate mediated by an ionic liquid bridge. *Nat. Sustainability* **9**, 108–116 (2026).

46. Li, J. Y. *et al.* Remote carbon monoxide spillover improves tandem urea electrosynthesis. *Angew. Chem. Int. Ed.* **64**, e202421266 (2025).

47. Xu, M. *et al.* Kinetically matched C–N coupling toward efficient urea electrosynthesis enabled on copper single-atom alloy. *Nat. Commun.* **14**, 6994 (2023).

48. Chen, K. *et al.* Urea electrosynthesis from nitrate and CO2 on diatomic alloys. *Adv. Mater.* **36**, 2402160 (2024).

49. Thompson, A. P. *et al.* LAMMPS – a flexible simulation tool for particle-based materials modeling at the atomic, meso, and continuum scales. *Comput. Phys. Commun.* **271**, 108171 (2022).

50. Kresse, G. & Furthmüller, J. Efficient iterative schemes for ab initio total-energy calculations using a plane-wave basis set. *Phys. Rev. B* **54**, 11169–11186 (1996).

51. Kresse, G. & Furthmüller, J. Efficiency of ab-initio total energy calculations for metals and semiconductors using a plane-wave basis set. *Comput. Mater. Sci.* **6**, 15–50 (1996).

52. Yu, Z. *et al.* D-band-center-engineered platinum-based nanozyme for personalized pharmacovigilance. *Angew. Chem. Int. Ed.* **137**, e202414625 (2025).

53. Liu, L. *et al.* Revealing the dependence of oxygen reduction mechanism and activity on the D-band center difference of Fe–M bimetallic sites. *Appl. Catal. B: Environ.* **384**, 126191 (2026).

54. Lian, H. *et al.* Positive shift of the d-band center in Cu nanoparticles facilitates electrocatalytic hydrogenation of furfural under mild pH conditions. *J. Catal.* **444**, 116003 (2025).

55. Wang, L., Zhang, S., Zhang, L. & Yu, J. Regulating the d–band center of Cu nanoparticles for efficient photo-driven catalytic CO2 reduction. *Appl. Catal. B: Environ.* **355**, 124167 (2024).

56. Zhang, J. *et al.* Size-induced d band center upshift of copper for efficient nitrate reduction to ammonia. *J. Colloid Interface Sci.* **658**, 934–942 (2024).

57. Madden, K. P. & Taniguchi, H. In stu radiolysis time-resolved ESR studies of spin trapping by DMPO:  Reevaluation of hydroxyl radical and hydrated electron trapping rates and spin adduct yields. *J. Phys. Chem.* **100**, 7511–7516 (1996).

58. Park, Y. O., Banholzer, W. F. & Masel, R. I. Adsorption and interaction of CO and NO on Pt(410): I. TPD studies. *Surf. Sci.* **155**, 341–365 (1985).

59. Gorte, R. J. & Schmidt, L. D. Interactions between NO and CO on Pt(111). *Surf. Sci.* **111**, 260–278 (1981).

60. Zhao, Y. *et al.* Elucidating electrochemical CO2 reduction reaction processes on Cu(hkl) single-crystal surfaces by in situ Raman spectroscopy. *Energy Environ. Sci.* **15**, 3968–3977 (2022).

61. Khan, K. M., Krishna, H., Majumder, S. K. & Gupta, P. K. Detection of urea adulteration in milk using near-infrared Raman spectroscopy. *Food Anal. Methods* **8**, 93–102 (2015).

62. Barker, I. K., Fawcett, V. & Long, D. A. Solvent dependence of the resonance Raman spectra of azobenzene, 4-aminoazobenzene, 4-methylaminobenzene and 4–dimethylaminoazobenzene. *J. Raman Spe.* **18**, 71–75 (1987).

63. Chen, S. *et al.* MOF encapsulating N–heterocyclic carbene-ligated copper single–atom site catalyst towards efficient methane electrosynthesis. *Angew. Chem. Int. Ed.* **61** (2022).

64. Mu, S. *et al.* Hydroxyl radicals dominate reoxidation of oxide-derived Cu in electrochemical CO2 reduction. *Nat. Commun.* **13**, 3694 (2022).

65. Bae, S. E., Stewart, K. L. & Gewirth, A. A. Nitrate adsorption and reduction on Cu(100) in acidic solution. *J. Am. Chem. Soc.* **129**, 10171–10180 (2007).

66. Chernyshova, I. V., Somasundaran, P. & Ponnurangam, S. On the origin of the elusive first intermediate of CO2 electroreduction. *Proc. Natl. Acad. Sci.* **115**, E9261–E9270 (2018).

67. Zhao, C. *et al.* Tailoring activation intermediates of CO2 initiates C–N coupling for highly selective urea electrosynthesis. *J. Am. Chem. Soc.* **147**, 8871–8880 (2025).

68. Taraschewski, M., Cammenga, H. K., Tuckermann, R. & Bauerecker, S. FTIR Study of CO2 and H2O/CO2 nanoparticles and their temporal evolution at 80 K. *J. Phys. Chem. A* **109**, 3337–3343 (2005).

69. Derreumaux, P. & Vergoten, G. A new spectroscopic molecular mechanics force field. Parameters for proteins. *J. Chem. Phys.* **102**, 8586–8605 (1995).

70. Perdew, J. P., Burke, K. & Ernzerhof, M. Generalized gradient approximation made simple. *Phys. Rev. Lett.* **77**, 3865–3868 (1996).

71. Feng, D. *et al.* Ni–Fe dual-site polymer catalyst for high performance and stable electrochemical urea synthesis from CO2 and NO3−. *ChemSusChem* **19**, e202502676 (2026).

72. Guan, Y. *et al.* Enhancing the yield of electrocatalytic C–N coupling for urea synthesis: challenges, strategies, and prospects. *Green Chem.* **28**, 783–812 (2026).
